# Supplementary material for: One-pot tandem reduction and site-selective halogenation of nitroarenes
Source: Royal Society of Chemistry journal article supplement (doi:10.1039/d3ob01732j), 2023-12-21
Supplement: d3ob01732j1.pdf [file d3ob01732j1.pdf]

## Supporting Information

### One-Pot Tandem Reduction and Site-Selective Halogenation of Nitroarenes Using a Mixture of Tin Salts

Ganesh Kumar Dhandabani,<sup>#[a]</sup> Li-Te Chang,<sup>#[a]</sup> Hao-Yu Hsieh,<sup>[b]</sup> Chia-Ling Shih,<sup>[b]</sup> and Ling-Wei Hsin <sup>\*[a,b]</sup>

<sup>a</sup> Center for Innovative Therapeutics Discovery, National Taiwan University, 17, Xuzhou Road, Room 936, Taipei 10055, Taiwan.

<sup>b</sup> School of Pharmacy, College of Medicine, National Taiwan University, 33, Linsen S. Road, Taipei 10050, Taiwan.

# Equal contribution to this manuscript

\* Correspondence author: Email: lwhsin@ntu.edu.tw

# Table of Contents

|                                                               |           |
|---------------------------------------------------------------|-----------|
| 1) General Information                                        | S3        |
| 2) Studies on Parameters                                      | S4-S8     |
| 3) General Experimental Procedures, Spectral Characterization | S9-S27    |
| 4) References                                                 | S28-29    |
| 5) Copies of $^1\text{H}$ -NMR, $^{13}\text{C}$ -NMR spectra  | S30-116   |
| 6) LC and GC data                                             | S117-S153 |

## 1) General Information

NMR spectra were recorded on Bruker DPX-200, AV-400 and AV-600 FT-NMR spectrometers. The chemical shift ( $\delta$ ) values are reported in parts per million (ppm), and the coupling constants ( $J$ ) are given in Hz. The spectra were recorded using  $\text{CDCl}_3$  or  $\text{DMSO-}d_6$  as a solvent.  $^1\text{H}$  NMR chemical shifts are referenced to tetramethylsilane (TMS) (0 ppm).  $^{13}\text{C}$  NMR was referenced to  $\text{CDCl}_3$  (77.16 ppm). The abbreviations used are as follows: s, singlet; d, doublet; t, triplet; q, quartet; dd, doublet of doublets; ddd, doublet of doublet of doublets; dt, doublet of triplets; td, triplet of doublets; m, multiplet. Thin-layer chromatography (TLC) was performed on Merck (art. 5715) silica gel plates and visualized under UV light (254 nm), upon treatment with iodine vapor, or upon heating after treatment with 5% phosphomolybdic acid in ethanol. Flash column chromatography was performed with Merck (art. 9385) 40 – 63  $\mu\text{m}$  silica gel 60. Anhydrous tetrahydrofuran (THF) was distilled from sodium-benzophenone prior to use. Methane sulfonyl chloride (MsCl) was distilled from phosphorus pentoxide under reduced pressure prior to use. Mass spectra and high-resolution mass spectra (HRMS) was measured using the ESI (FT-MS solariX) at Academia Sinica, Taipei. Melting points were determined on an EZ-Melt (Automated melting point apparatus). All products reported showed  $^1\text{H}$  NMR and  $^{13}\text{C}$  NMR spectra in agreement with the assigned structures. Reaction progress and product mixtures were routinely monitored by TLC using Merck TLC aluminum sheets (silica gel 60 F254). Column chromatography was carried out with 230–400 mesh silica gel 60 (Merck)/neutral alumina and a mixture of *n*-hexane/ethyl acetate, or dichloromethane/methanol as an eluent. All the starting material was commercially available or prepared by following the reported literature methods.<sup>1-13</sup>

## 2) Studies on Parameters

**Table 1 Optimization of chlorination reaction conditions.**

**1a**

$\xrightarrow[\text{EtOH, 75 } ^\circ\text{C}]{\text{SnX}_4, \text{SnCl}_2, \text{HX (X = Cl or Br)}}$

$\text{H}_3\text{C}$ ,  $\text{NO}_2$ ,  $\text{S}$ ,  $\text{N(CH}_3)_2$ ,  $\text{OCH}_3$

$\text{H}_3\text{C}$ ,  $\text{NH}_2$ ,  $\text{S}$ ,  $\text{N(CH}_3)_2$ ,  $\text{OCH}_3$ ,  $\text{X}$

**2a - *p*-Cl-BP** X = Cl  
**3a - P** X = H  
**4a' - EtO-BP** X = OEt  
**4a - *p*-Br-BP** X = Br

| Entry | SnCl <sub>2</sub> eq. | SnX <sub>4</sub> <sup>a</sup> | HX <sup>a</sup> | Results (LC area%)           |                |                      |                              |                 |
|-------|-----------------------|-------------------------------|-----------------|------------------------------|----------------|----------------------|------------------------------|-----------------|
|       |                       |                               |                 | <i>p</i> -Cl-BP<br><b>2a</b> | P<br><b>3a</b> | EtO-BP<br><b>4a'</b> | <i>p</i> -Br-BP<br><b>4a</b> | SM<br><b>1a</b> |
| 1     | 5.0                   | -                             | Cl (1N)         | 30                           | 61             | 4                    | -                            | -               |
| 2     | 3.0                   | -                             | Cl (1N)         | 51                           | 31             | 12                   | -                            | -               |
| 3     | -                     | Cl                            | Cl (2N)         | 6                            | 2              | 1                    | -                            | 88              |
| 4     | 0.5                   | Cl                            | Cl (2N)         | 17                           | 2              | 2                    | -                            | 76              |
| 5     | 1.0                   | Cl                            | Cl (2N)         | 36                           | 6              | 9                    | -                            | 45              |
| 6     | 1.5                   | Cl                            | Cl (2N)         | 54                           | 8              | 12                   | -                            | 20              |
| 7     | 2.0                   | Cl                            | Cl (2N)         | 63                           | 13             | 15                   | -                            | 3               |
| 8     | 2.5                   | Cl                            | Cl (2N)         | 65                           | 15             | 15                   | -                            | -               |
| 9     | 3.0                   | Cl                            | Cl (2N)         | 64                           | 10             | 15                   | -                            | -               |
| 10    | 4.0                   | Br                            | Cl (2N)         | 6                            | 58             | 2                    | 26                           | -               |
| 11    | 3.0                   | Br                            | Br (2.9N)       | 1                            | 41             | 2                    | 40                           | -               |

<sup>a</sup> Reaction condition: 5 eq SnX<sub>4</sub>, 5 mL/mmol HX, 50 mL/mmol EtOH.

**Table 2 Optimization of bromination reaction conditions.**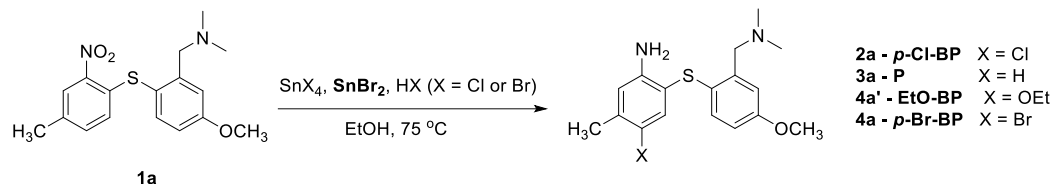

| Entry | SnBr <sub>2</sub> eq. | SnX <sub>4</sub> <sup>a</sup> | HX <sup>a</sup> | Results (LC area%)           |                |                      |                              |                 |
|-------|-----------------------|-------------------------------|-----------------|------------------------------|----------------|----------------------|------------------------------|-----------------|
|       |                       |                               |                 | <i>p</i> -Cl-BP<br><b>2a</b> | P<br><b>3a</b> | EtO-BP<br><b>4a'</b> | <i>p</i> -Br-BP<br><b>4a</b> | SM<br><b>1a</b> |
| 1     | -                     | Br                            | Cl (2N)         | -                            | 1              | 2                    | -                            | 95              |
| 2     | 0.5                   | Br                            | Cl (2N)         | 1                            | 7              | 3                    | 14                           | 73              |
| 3     | 1.0                   | Br                            | Cl (2N)         | 1                            | 18             | 2                    | 11                           | 64              |
| 4     | 1.5                   | Br                            | Cl (2N)         | 2                            | 32             | 3                    | 17                           | 42              |
| 5     | 2.0                   | Br                            | Cl (2N)         | 2                            | 41             | 2                    | 24                           | 24              |
| 6     | 2.5                   | Br                            | Cl (2N)         | 3                            | 46             | 2                    | 30                           | 10              |
| 7     | 3.0                   | Br                            | Cl (2N)         | 3                            | 52             | 2                    | 33                           | -               |
| 8     | 3.5                   | Br                            | Cl (2N)         | 3                            | 52             | 2                    | 34                           | -               |
| 9     | 4.0                   | Br                            | Br (2.9N)       | -                            | 56             | 2                    | 31                           | -               |
| 10    | 0.5                   | Cl                            | Br (2.9N)       | 2                            | 7              | 2                    | 4                            | 85              |
| 11    | 1.0                   | Cl                            | Br (2.9N)       | 3                            | 11             | 2                    | 7                            | 75              |
| 12    | 1.5                   | Cl                            | Br (2.9N)       | 4                            | 19             | 2                    | 13                           | 60              |
| 13    | 2.0                   | Cl                            | Br (2.9N)       | 3                            | 16             | 3                    | 11                           | 63              |
| 14    | 2.5                   | Cl                            | Br (2.9N)       | 6                            | 33             | 3                    | 19                           | 35              |
| 15    | 3.0                   | Cl                            | Br (2.9N)       | 7                            | 35             | 3                    | 22                           | 30              |
| 16    | 3.5                   | Cl                            | Br (2.9N)       | 7                            | 32             | 4                    | 23                           | 29              |
| 17    | 4.0                   | Cl                            | Br (2.9N)       | 7                            | 45             | 5                    | 24                           | 15              |

<sup>a</sup> Reaction condition: 5 eq SnX<sub>4</sub>, 5 mL/mmol HX, 50 mL/mmol EtOH.

**Table 3 Attempt for fluorination reaction.<sup>a,b</sup>**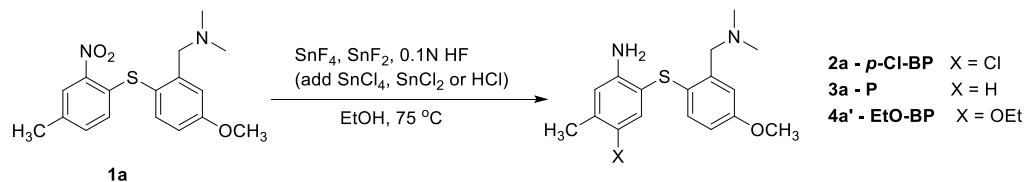

| Entry | SnCl <sub>2</sub><br>equiv. | SnCl <sub>4</sub><br>equiv. | HCl              | Results (LC area%)           |                |                      |                 |
|-------|-----------------------------|-----------------------------|------------------|------------------------------|----------------|----------------------|-----------------|
|       |                             |                             |                  | <i>p</i> -Cl-BP<br><b>2a</b> | P<br><b>3a</b> | EtO-BP<br><b>4a'</b> | SM<br><b>1a</b> |
| 1     | -                           | -                           | -                | -                            | 4              | 4                    | 92              |
| 2     | -                           | -                           | +3N <sup>c</sup> | 29                           | 35             | 21                   | 12              |
| 3     | -                           | 5.0                         | -                | 17                           | 30             | 17                   | 34              |
| 4     | 0.5                         | -                           | -                | 5                            | 18             | 27                   | 45              |
| 5     | 1.5                         | -                           | -                | 11                           | 29             | 48                   | -               |
| 6     | 3.0                         | -                           | -                | 10                           | 31             | 49                   | -               |

<sup>a</sup> Reaction condition: 5 eq SnF<sub>4</sub>, 3 eq SnF<sub>2</sub>, 5 mL/mmol of 0.1N HF, 50 mL/mmol EtOH; <sup>b</sup> no any fluorination product was detected in these studies; <sup>c</sup>use conc. HCl to form 3N HCl reaction mixture.

**Table 4 Study of solvent effect for the *para*-substitution reactions.<sup>a,b</sup>**

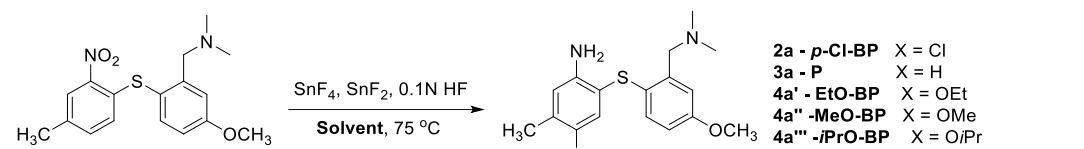

**2a - *p*-Cl-BP** X = Cl  
**3a - P** X = H  
**4a' - EtO-BP** X = OEt  
**4a'' - MeO-BP** X = OMe  
**4a''' - *i*PrO-BP** X = OiPr

| S.No | SnCl <sub>2</sub> eq. | Solvent           | Results (LC area% of products) |           |            |           |             |                  |
|------|-----------------------|-------------------|--------------------------------|-----------|------------|-----------|-------------|------------------|
|      |                       |                   | <i>p</i> -Cl-BP                | P         | EtO-BP     | SM        | MeO-BP      | <i>i</i> -PrO-BP |
|      |                       |                   | <b>2a</b>                      | <b>3a</b> | <b>4a'</b> | <b>1a</b> | <b>4a''</b> | <b>4a'''</b>     |
| 1    | 0.5                   | EtOH              | 5                              | 18        | 27         | 45        | -           | -                |
|      | 1.0                   |                   | 16                             | 23        | 34         | 16        | -           | -                |
|      | 1.5                   |                   | 11                             | 29        | 48         | -         | -           | -                |
|      | 2.0                   |                   | 12                             | 38        | 43         | -         | -           | -                |
|      | 2.5                   |                   | 9                              | 29        | 49         | -         | -           | -                |
|      | 3.0                   |                   | 10                             | 31        | 49         | -         | -           | -                |
| 2    | 0.5                   | <i>i</i> -PrOH    | -                              | 3         | -          | 90        | -           | 3                |
|      | 1.0                   |                   | 6                              | 9         | -          | 65        | -           | 11               |
|      | 1.5                   |                   | 13                             | 18        | -          | 46        | -           | 18               |
|      | 2.0                   |                   | 20                             | 33        | -          | -         | -           | 27               |
|      | 3.0                   |                   | 20                             | 33        | -          | -         | -           | 27               |
| 3    | 1.0                   | DMF               | 1                              | 5         | -          | 60        | -           | -                |
|      | 2.0                   |                   | 6                              | 10        | -          | 23        | -           | -                |
|      | 3.0                   |                   | 6                              | 18        | -          | -         | -           | -                |
| 4    | 1.0                   | <i>t</i> -BuOH    | 5                              | 5         | -          | 88        | -           | -                |
|      | 2.0                   |                   | 21                             | 27        | -          | 23        | -           | -                |
|      | 3.0                   |                   | 35                             | 54        | -          | -         | -           | -                |
| 5    | 1.0                   | MeOH <sup>c</sup> | 1                              | 2         | -          | 95        | 2           | -                |
|      | 2.0                   |                   | 21                             | 12        | -          | 42        | 23          | -                |
|      | 3.0                   |                   | 38                             | 30        | -          | 12        | 16          | -                |
| 6    | 1.0                   | Dioxane           | -                              | 2         | -          | 96        | -           | -                |
|      | 2.0                   |                   | -                              | 4         | -          | 77        | -           | -                |
|      | 3.0                   |                   | -                              | 13        | -          | 43        | -           | -                |

<sup>a</sup> Reaction condition: 5 eq SnF<sub>4</sub>, 5 mL/mmol of 0.1N HF, 50 mL/mmol solvent; <sup>b</sup> no any fluorination product was detected in these studies; <sup>c</sup> oil bath at 70°C.

**Table 5 Study of solvent effect for *para*-chlorination reactions.<sup>a</sup>**

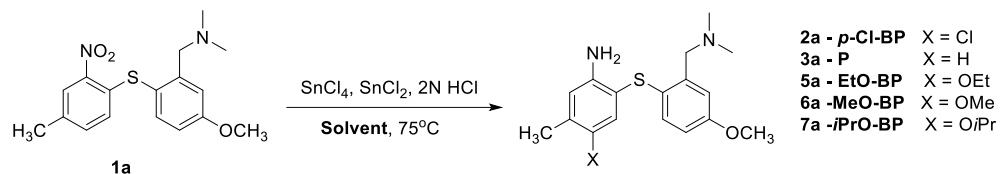

| S.No | SnCl <sub>2</sub> eq. | Solvent           | Results (LC area%)           |                |                      |                 |                     |
|------|-----------------------|-------------------|------------------------------|----------------|----------------------|-----------------|---------------------|
|      |                       |                   | <i>p</i> -Cl-BP<br><b>2a</b> | P<br><b>3a</b> | EtO-BP<br><b>4a'</b> | SM<br><b>1a</b> | MeO-BP<br><b>6a</b> |
| 1    | -                     | EtOH              | 6                            | 2              | 1                    | 88              | -                   |
|      | 0.5                   |                   | 17                           | 2              | 2                    | 76              | -                   |
|      | 1.0                   |                   | 36                           | 6              | 9                    | 45              | -                   |
|      | 1.5                   |                   | 54                           | 8              | 12                   | 20              | -                   |
|      | 2.0                   |                   | 63                           | 13             | 15                   | 3               | -                   |
|      | 2.5                   |                   | 65                           | 15             | 15                   |                 | -                   |
| 2    | 1.0                   | <i>t</i> -BuOH    | 37                           | 9              |                      | 48              | -                   |
|      | 2.0                   |                   | 65                           | 19             |                      | 2               | -                   |
|      | 3.0                   |                   | 63                           | 22             |                      |                 | -                   |
| 3    | 1.0                   | MeOH <sup>b</sup> | 35                           | 3              |                      | 58              | 2                   |
|      | 2.0                   |                   | 69                           | 9              |                      | 8               | 12                  |
|      | 3.0                   |                   | 75                           | 14             |                      |                 | 9                   |

<sup>a</sup> Reaction condition: 5 eq SnCl<sub>4</sub>, 5 mL/mmol of 2N HCl, 50 mL/mmol solvent; <sup>b</sup> oil bath at 70°C.



### 3) General Experimental Procedures, Spectral Characterization.

#### 3.1) General Experimental Procedures and Spectral Characterization of Starting Materials.

##### General Procedure A: Synthesis of *N,N*-Dimethyl-2-(2-nitro-4-methylphenylthio)-5-methoxybenzylamine (**1a**).<sup>1-12</sup>

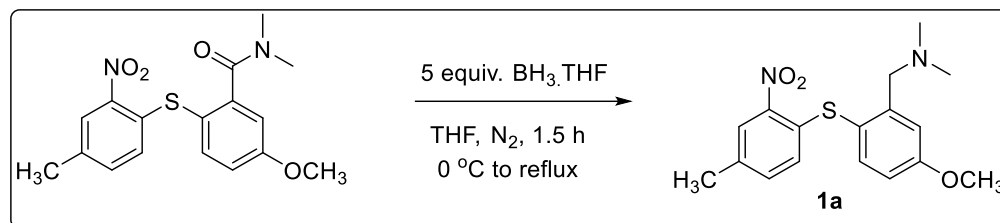

To a solution of 5-methoxy-2-(4-methyl-2-nitrophenylthio)-*N,N*-dimethylbenzamide<sup>1</sup> (368 mg, 1.06 mmol) in dry THF (32 mL) was added borane tetrahydrofuran complex solution (1 M in THF, 5.3 mL, 5.31 mmol) at 0°C. The mixture was stirred at reflux temperature under  $\text{N}_2$  for 1.5 h and then cooled to rt. The conc. HCl (2.8 mL) was added to the mixture, stirred at rt under  $\text{N}_2$  for 10 min and evaporated to afford a yellow oil. Water (31 mL) was added to the yellow oil and the solution was stirred at reflux temperature under  $\text{N}_2$  for 30 min. The solution was adjusted to pH = 10-11 by sat.  $\text{Na}_2\text{CO}_3$  and extracted with  $\text{CH}_2\text{Cl}_2$  (30 mL  $\times$  3). The combined organic extracts were washed with brine, dried ( $\text{MgSO}_4$ ), filtered, and evaporated. The crude product was chromatographed (silica gel, 1-2% MeOH in  $\text{CH}_2\text{Cl}_2$ ) to afford a yellow oil **1a** (259 mg, 74%). <sup>1</sup>H NMR (400 MHz,  $\text{CDCl}_3$ )  $\delta$  2.19 (s, 6H,  $-\text{N}(\text{CH}_3)_2$ ), 2.35 (s, 3H, 4'- $\text{CH}_3$ ), 3.49 (s, 2H, 1- $\text{CH}_2\text{N}(\text{CH}_3)_2$ ), 3.88 (s, 3H, 5- $\text{OCH}_3$ ), 6.54 (d,  $J = 8.3$  Hz, 1H, H-4), 6.88 (dd,  $J = 2.9, 8.5$  Hz, 1H, H-5'), 7.11 (dd,  $J = 1.6, 8.3$  Hz, 1H, H-3), 7.27 (s, 1H, H-6), 7.47 (d,  $J = 8.5$  Hz, 1H, H-6'), 8.06 (s, 1H, H-3'); <sup>13</sup>C NMR (100 MHz,  $\text{CDCl}_3$ )  $\delta$  20.4 (4- $\text{CH}_3$ ), 45.5 ( $-\text{N}(\text{CH}_3)_2$ ), 55.5 (5- $\text{OCH}_3$ ), 61.1 (1- $\text{CH}_2\text{N}(\text{CH}_3)_2$ ), 114.3 (C-4), 115.3 (C-6), 120.6 (C-1'), 126.0 (C-3'), 127.5 (C-3), 134.5 (C-6'), 134.9 (C-2), 136.7 (C-4'), 138.8 (C-5'), 144.5 (C-1), 145.8 (C-2'), 161.5 (C-5).

## General Procedures B: Synthesis of (4-methoxyphenyl)(4-methyl-2-nitrophenyl)sulfane

(1b)<sup>1</sup>

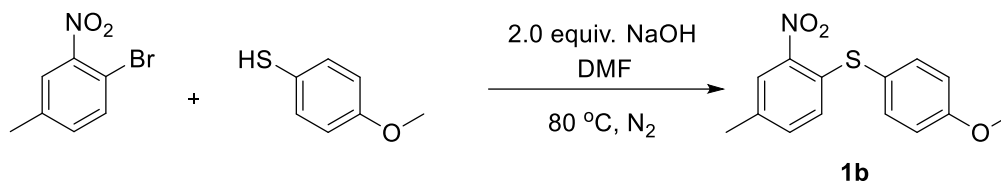

A mixture of 1-bromo-4-methyl-2-nitrobenzene (216 mg, 1.00 mmol), 4-methoxybenzenethiol (113 mL, 1.10 mmol), and NaOH (80 mg, 2.00 mmol) in dimethylformamide (5.0 mL) was flushed with N<sub>2</sub>, and stirred at 80°C for 2 h. The reaction mixture was extracted with water (50 mL) and ethyl acetate (5 mL × 3). The combined organic extracts were washed with brine, dried (MgSO<sub>4</sub>), filtered, and evaporated. The crude product was purified with flash column chromatography (silica gel, 20% CH<sub>2</sub>Cl<sub>2</sub> in hexanes (500 mL)) to afford **1b** 269 mg (98%) as a yellow solid. <sup>1</sup>H NMR (400 MHz, CDCl<sub>3</sub>) δ 8.03 (s, 1H), 7.48 (d, *J* = 8.5 Hz, 2H), 7.14 (dd, *J* = 8.3, 1.7 Hz, 1H), 6.99 (d, *J* = 8.6 Hz, 2H), 6.71 (d, *J* = 8.3 Hz, 1H), 3.87 (s, 3H), 2.35 (s, 3H); <sup>13</sup>C NMR (151 MHz, CDCl<sub>3</sub>) δ 161.31, 144.81, 137.87, 137.39, 135.36, 134.79, 128.13, 126.03, 121.87, 115.84, 55.69, 20.63.

### Synthesis of (2-Nitrophenyl)(phenyl)sulfane (4-methyl-2-nitrophenyl)(phenyl)sulfane (**1c**)<sup>1</sup>

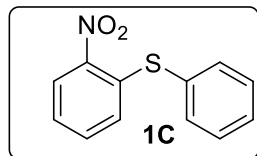

Compound **1c** was synthesized using 1-bromo-2-nitrobenzene (202 mg, 1.00 mmol), following general procedure B as a yellow color solid with 71% yield. <sup>1</sup>H NMR (400 MHz, CDCl<sub>3</sub>) δ 6.86 (d, *J* = 8.2 Hz, 1H), 7.21 (td, *J* = 7.3, 0.8 Hz, 1H), 7.34 (td, *J* = 7.7, 1.1 Hz, 1H), 7.46-7.52 (m, 3H), 7.56-7.60 (m, 2H), 8.23 (dd, *J* = 8.2, 0.8 Hz, 1H); <sup>13</sup>C NMR (100 MHz, CDCl<sub>3</sub>) δ 125.0, 125.8, 128.4, 130.1, 130.2 (2C), 131.0, 133.5, 135.9 (2C), 139.5, 144.9.

### Synthesis of (4-Methyl-2-nitrophenyl)(phenyl)sulfane (**1d**)<sup>1</sup>

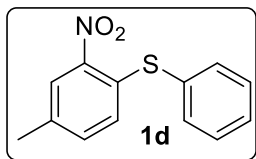

Compound **1d** was synthesized using 1-bromo-4-methyl-2-nitrobenzene (216 mg, 1.00 mmol) following general procedure B as a yellow solid with 81% yield. <sup>1</sup>H NMR (400 MHz, CDCl<sub>3</sub>) δ 2.34 (s, 3H), 6.76 (d, *J* = 8.3 Hz, 1H), 7.15 (dd, *J* = 8.4, 1.5 Hz, 1H), 7.44-7.48 (m, 3H), 7.55-7.57 (m, 2H), 8.03 (d, *J* = 1.0 Hz, 1H); <sup>13</sup>C NMR (100 MHz, CDCl<sub>3</sub>) δ 20.5, 125.8, 128.5, 129.9, 130.1 (2C), 131.5, 134.7, 135.6, 135.7 (2C), 135.8, 145.1.

## Synthesis of (4-Fluoro-2-nitrophenyl)(phenyl)sulfane (**1e**) and *N,N*-Dimethyl-3-nitro-4-(phenylthio)aniline (**1h**)<sup>2</sup>

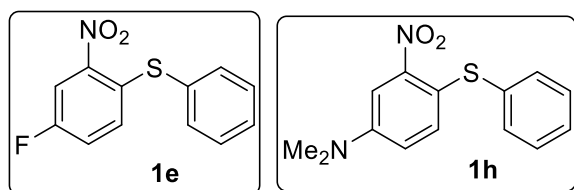

Compound **1e** & **1h** were synthesized using 1-bromo-4-fluoro-2-nitrobenzene (220 mg, 1.00 mmol) following general procedure B as yellow solid and orange solid with 12% and 71% (the

source of  $N(CH_3)_2$  is DMF) yield, respectively. **1e**:  $^1H$  NMR (400 MHz,  $CDCl_3$ )  $\delta$  2.98 (s, 6H), 6.75 (dd,  $J = 9.0, 2.9$ , 1H), 6.91 (d,  $J = 9.0$  Hz, 1H), 7.34-7.40 (m, 4H), 7.43-7.46 (m, 2H);  $^{13}C$  NMR (100 MHz,  $CDCl_3$ )  $\delta$  40.4 (2C), 107.4, 117.7, 120.6, 128.5, 129.6 (2C), 131.9, 133.6 (2C), 134.2, 148.6, 148.9; HRMS (ESI) calcd for  $C_{14}H_{14}N_2NaO_2S$  [ $M+Na$ ]<sup>+</sup>, 297.0668; found, 297.0673. **1h**:  $^1H$  NMR (400 MHz,  $CDCl_3$ )  $\delta$  6.85 (dd,  $J = 9.0, 5.2$  Hz, 1H), 7.11 (td,  $J = 8.1, 2.8$  Hz, 1H), 7.47-7.50 (m, 3H), 7.56-7.58 (m, 2H), 7.94 (dd,  $J = 8.3, 2.7$  Hz, 1H);  $^{13}C$  NMR (100 MHz,  $CDCl_3$ )  $\delta$  112.8 (d,  $J = 27$  Hz), 121.5 (d,  $J = 21$  Hz), 130.1 (d,  $J = 8$  Hz), 130.3, 130.3 (2C), 130.9, 135.0 (d,  $J = 3$  Hz), 135.9 (2C), 145.2 (d,  $J = 9$  Hz) 159.5 (d,  $J = 248$  Hz).

## Synthesis of (4-Methoxy-2-nitrophenyl)(phenyl)sulfane (**1f**)<sup>8</sup>

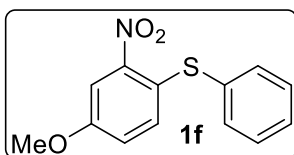

Compound **1f** was synthesized using 1-bromo-4-methoxy-2-nitrobenzene (232 mg, 1.00 mmol) following general procedure B as a yellow solid with 81% yield.  $^1H$  NMR (400 MHz,  $CDCl_3$ )  $\delta$  3.83 (s, 3H), 6.82 (d,  $J = 9.0$  Hz, 1H), 6.96 (dd,  $J = 9.0, 2.7$  Hz, 1H), 7.44 (d,  $J = 2.3$  Hz, 3H), 7.53 (t,  $J = 3.6$  Hz, 2H), 7.68 (d,  $J = 2.6$  Hz, 1H);  $^{13}C$  NMR (100 MHz,  $CDCl_3$ )  $\delta$  65.0, 109.1, 121.7, 129.6, 129.6, 130.0 (2C), 130.2, 132.1, 135.3 (2C), 146.1, 157.4

## Synthesis of (2-Nitro-4-(trifluoromethyl)phenyl)(phenyl)sulfane (**1g**)<sup>9</sup>

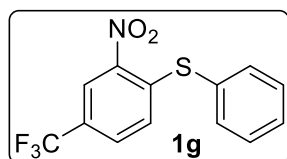

Compound **1g** was synthesized using 1-bromo-2-nitro-4-(trifluoromethyl)benzene (270 mg, 1.00 mmol) following general procedure B as a yellow solid with 89% yield.  $^1H$  NMR (400 MHz,  $CDCl_3$ )  $\delta$  6.96 (d,  $J = 8.6$  Hz, 1H), 7.53-7.61 (m, 6H), 8.50 (s, 1H);  $^{13}C$  NMR (100 MHz,  $CDCl_3$ )  $\delta$  123.0 (q,  $J = 271$  Hz), 123.3 (q,  $J = 4$  Hz), 127.2 (q,  $J = 34$  Hz), 129.0, 129.6 (q,  $J = 3$  Hz), 129.8, 130.6 (2C), 130.8, 136.1 (2C), 144.3, 144.8.

### Synthesis of (2-Methyl-6-nitrophenyl)(phenyl)sulfane (**1i**)<sup>10</sup>

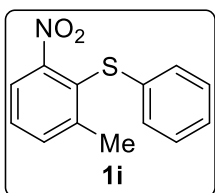

Compound **1i** was synthesized using 2-bromo-1-methyl-3-nitrobenzene (216mg, 1.00 mmol) following general procedure B as a yellow solid with 84% yield. <sup>1</sup>H NMR (400 MHz, CDCl<sub>3</sub>) δ 2.36 (s, 3H), 7.07-7.09 (m, 2H), 7.14-7.17 (m, 1H), 7.20-7.25 (m, 2H), 7.38-7.46 (m, 2H), 7.54 (dd, *J* = 7.4, 0.9 Hz, 1H); <sup>13</sup>C NMR (100 MHz, CDCl<sub>3</sub>) δ 21.6, 121.2, 125.5, 126.5, 128.2 (2C), 129.3 (2C), 129.7, 133.8, 135.5, 145.6, 155.7.

### Synthesis of (2-Methoxy-6-nitrophenyl)(phenyl)sulfane (**1j**)

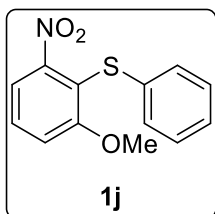

Compound **1j** was synthesized using 2-bromo-1-methoxy-3-nitrobenzene (464 mg, 2.00 mmol) following general procedure B as a yellow solid with 81% yield. <sup>1</sup>H NMR (400 MHz, CDCl<sub>3</sub>) δ 3.72 (s, 3H), 7.06 (dd, *J* = 8.2, 0.7 Hz, 1H), 7.16-7.21 (m, 5H), 7.33 (dd, *J* = 8.0, 1.0 Hz, 1H), 8.44 (d, *J* = 8.1 Hz, 1H); <sup>13</sup>C NMR (100 MHz, CDCl<sub>3</sub>) δ 56.7, 114.7, 115.6, 116.6, 126.7, 128.9 (2C), 129.7 (2C), 130.4, 135.5, 155.1, 160.5; HRMS (ESI) calcd for C<sub>13</sub>H<sub>11</sub>NaNO<sub>3</sub>S [M+Na]<sup>+</sup>, 284.0352; found, 284.0375.

### Synthesis of 3-Nitro-2-(phenylthio)benzoic acid (**1k**)<sup>13</sup>

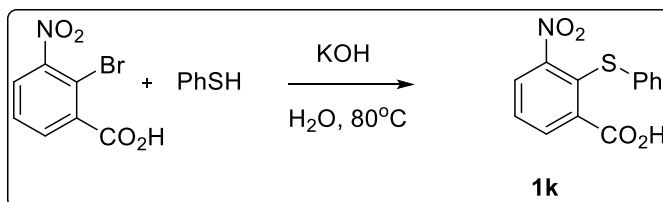

A mixture of 2-bromo-3-nitrobenzoic acid (403.2 mg, 2.00 mmol), benzenethiol (225.2 mL, 2.20 mmol), and KOH (316.8 mg, 4.40 mmol) in water (10.0 mL) was flushed with N<sub>2</sub>, and stirred at 80°C for 1 h. The reaction mixture was extracted with water (40 mL) and CH<sub>2</sub>Cl<sub>2</sub> (10 mL × 3). The combined organic extracts were washed with brine, dried (MgSO<sub>4</sub>), filtered, and evaporated. The crude product was purified with flash column chromatography (silica gel, 4% MeOH in CH<sub>2</sub>Cl<sub>2</sub>) to afford **1k** (253.2 mg, 46%) as a brown solid. <sup>1</sup>H NMR (400 MHz, CDCl<sub>3</sub>) δ 7.19-7.25 (m, 5H), 7.47 (t, *J* = 7.9 Hz, 1H), 7.88-7.91 (m, 2H), 8.47 (bs, 1H); <sup>13</sup>C NMR (100 MHz, CDCl<sub>3</sub>) δ 127.4, 128.1, 128.2, 129.4 (2C), 131.6 (2C), 132.3, 133.8, 134.6, 136.5, 153.4, 170.9.

### Synthesis of (2-Nitrophenyl)(propyl)sulfane (**1l**)<sup>4</sup>

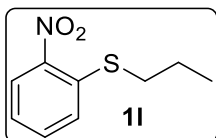

Compound **1l** was synthesized using 1-bromo-2-nitrobenzene (202 mg, 1.00 mmol) following the general procedure B as a yellow solid with 74% yield.

<sup>1</sup>H NMR (400 MHz, CDCl<sub>3</sub>) δ 1.10 (t, *J* = 7.4 Hz, 3H), 1.77 (q, *J* = 7.4 Hz, 2H), 2.95 (t, *J* = 7.4 Hz, 2H), 7.22-7.27 (m, 1H), 7.41 (d, *J* = 8.0 Hz, 1H),

7.53-7.57 (m, 1H), 8.19 (dd, *J* = 8.3, 1.3 Hz, 1H); <sup>13</sup>C NMR (100 MHz, CDCl<sub>3</sub>) δ 13.7, 21.4, 34.3, 124.3, 126.1, 126.7, 133.5, 138.2, 146.1.

### Synthesis of (4-Methyl-2-nitrophenyl)(propyl)sulfane (**1m**)<sup>3</sup>

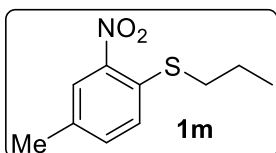

Compound **1m** was synthesized using 1-bromo-4-methyl-2-nitrobenzene (216 mg, 1.00 mmol) following general procedure B as a yellow solid with 82% yield. <sup>1</sup>H NMR (400 MHz, CDCl<sub>3</sub>) δ 1.09 (t, *J* = 7.3 Hz, 3H),

1.71-1.80 (m, 2H), 2.39 (s, 3H), 2.92 (t, *J* = 7.3 Hz, 2H), 7.29 (d, *J* = 8.3 Hz, 1H), 7.36 (dd, *J* = 8.4, 1.7 Hz, 1H), 8.00 (d, *J* = 0.8 Hz, 1H); <sup>13</sup>C NMR (100 MHz, CDCl<sub>3</sub>) δ 13.8, 20.5, 21.6, 34.5, 126.3, 126.8, 134.5, 134.6, 134.9, 146.3.

### Synthesis of (4-Fluoro-2-nitrophenyl)(propyl)sulfane (**1n**)<sup>5</sup>

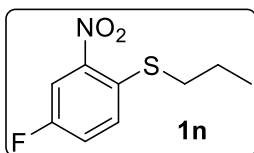

Compound **1n** was synthesized using 1-bromo-4-fluoro-2-nitrobenzene (220 mg, 1.00 mmol) following general procedure B as a yellow solid with 51% yield. <sup>1</sup>H NMR (400 MHz, CDCl<sub>3</sub>) δ 1.10 (t, *J* = 7.3 Hz, 3H), 1.77 (q,

*J* = 7.4 Hz, 2H), 2.94 (t, *J* = 7.3 Hz, 2H), 7.41 (td, *J* = 7.2, 2.6 Hz, 1H), 7.38-7.42 (m, 1H), 7.92 (dd, *J* = 8.4, 2.6 Hz, 1H); <sup>13</sup>C NMR (100 MHz, CDCl<sub>3</sub>) δ 13.8, 21.5, 34.8, 113.3 (d, *J* = 26 Hz), 121.4 (d, *J* = 22 Hz), 128.5 (d, *J* = 7 Hz), 133.5 (d, *J* = 3 Hz), 146.6 (d, *J* = 8 Hz), 159.2 (d, *J* = 247 Hz).

### Synthesis of (3-Nitrophenyl)(phenyl)sulfane (**1o**)<sup>12</sup>

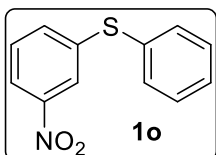

Compound **1o** was synthesized using 1-bromo-3-nitrobenzene (202 mg, 1.00 mmol) following general procedure B as a yellow solid with 52% yield. <sup>1</sup>H

NMR (400 MHz, CDCl<sub>3</sub>) δ 7.38-7.42 (m, 4H), 7.46-7.50 (m, 3H), 7.98 (dt, *J* = 8.0, 1.0 Hz, 1H), 8.02 (t, *J* = 1.7 Hz, 1H); <sup>13</sup>C NMR (100 MHz, CDCl<sub>3</sub>) δ 121.0, 123.2, 129.0, 129.8, 129.9 (2C), 132.2, 133.5 (2C), 133.3, 140.6, 148.7.

### Synthesis of (3-Nitro-5-(trifluoromethyl)phenyl)(phenyl)sulfane (**1p**)<sup>11</sup>

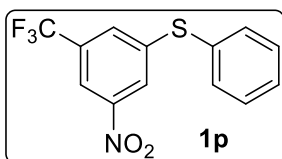

Compound **1p** was synthesized using 1-bromo-3-nitro-5-(trifluoromethyl)benzene (270 mg, 1.00 mmol) following general procedure B as a yellow solid with 67% yield. <sup>1</sup>H NMR (400 MHz, CDCl<sub>3</sub>) δ 7.46-7.48 (m, 3H), 7.51-7.55 (m, 2H), 7.67 (s, 1H), 8.07 (s, 1H), 8.20 (s, 1H); <sup>13</sup>C NMR (100 MHz, CDCl<sub>3</sub>) δ 117.6 (q, *J* = 4 Hz), 122.7 (q, *J* = 272 Hz), 124.9, 129.3 (q, *J* = 4 Hz), 130.2, 130.4 (2C), 132.4 (q, *J* = 4 Hz), 134.5 (2C), 144.8, 148.9.

### Synthesis of 1-Nitro-2-phenoxybenzene (**1q**)

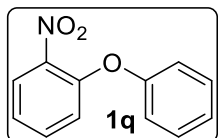

Compound **1q** was synthesized using 1-bromo-2-nitrobenzene (202 mg, 1.00 mmol) following general procedure B as a yellow solid with 74% of yield. <sup>1</sup>H NMR (400 MHz, CDCl<sub>3</sub>) δ 7.00 (dd, *J* = 8.4, 0.8 Hz, 1H), 7.03 (d, *J* = 3.3 Hz, 2H) 7.16-7.25 (m, 2H), 7.36-7.40 (m, 2H), 7.47-7.51 (m, 1H), 7.94 (dd, *J* = 8.1, 1.7 Hz, 1H); <sup>13</sup>C NMR (100 MHz, CDCl<sub>3</sub>) δ 119.3 (2C), 120.5, 123.2, 124.6, 125.7, 130.1 (2C), 134.3, 141.3, 150.7, 155.8

### Synthesis of 4-Methyl-2-nitro-1-phenoxybenzene (**1r**)<sup>6</sup>

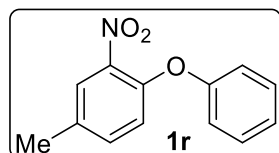

Compound **1r** was synthesized using 1-bromo-4-methyl-2-nitrobenzene (216 mg, 1.00 mmol) following general procedure B as a dark red solid with 65% yield. <sup>1</sup>H NMR (400 MHz, CDCl<sub>3</sub>) δ 2.40 (s, 3H), 6.94 (d, *J* = 8.4 Hz, 1H), 6.99-7.02 (m, 2H), 7.12-7.16 (m, 1H), 7.30-7.36 (m, 3H), 7.75 (d, *J* = 1.7 Hz, 1H); <sup>13</sup>C NMR (100 MHz, CDCl<sub>3</sub>) δ 20.5, 118.7 (2C), 121.2, 124.2, 125.8, 130.0 (2C), 133.8, 135.0, 141.3, 148.2, 156.5

### Synthesis of 4-Fluoro-2-nitro-1-phenoxybenzene (**1s**)<sup>7</sup>

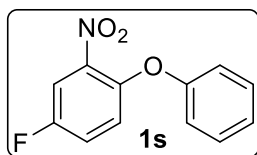

Compound **1s** was synthesized using 1-bromo-4-fluoro-2-nitrobenzene (220 mg, 1.00 mmol) following general procedure B as a yellow solid with 47% yield. <sup>1</sup>H NMR (400 MHz, CDCl<sub>3</sub>) δ 7.00-7.06 (m, 3H), 7.17 (t, *J* = 7.4 Hz, 1H) 7.23-7.28 (m, 1H), 7.34-7.41 (m, 2H), 7.69 (dd, *J* = 7.7, 3.1 Hz, 1H); <sup>13</sup>C NMR (100 MHz, CDCl<sub>3</sub>) δ 112.9, 118.7 (2C), 121.5 (d, *J* = 23 Hz), 122.7, 124.6, 130.2 (2C), 141.4 (d, *J* = 9 Hz) 146.9, 156.0, 158.3

## Synthesis of (2-Nitrophenyl)(phenyl)selane (**1t**)<sup>1</sup>

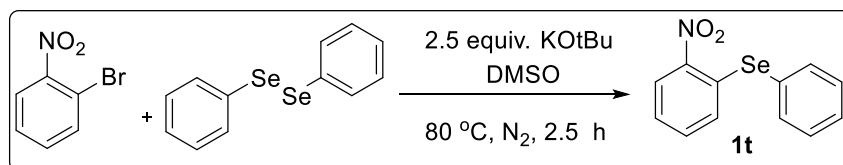

A mixture of 1-bromo-2-nitrobenzene (202 mg, 1.00 mmol), 1,2-diphenyldiselenane (156 mg, 0.5 mmol), and *t*-BuOK (280 mg, 2.50 mmol) in DMSO (1.0 mL) was flushed with N<sub>2</sub>, and stirred at 80°C for 2.5 h. The reaction mixture was extracted with water (50 mL) and ethyl acetate (5 mL × 3). The combined organic extracts were washed with brine, dried (MgSO<sub>4</sub>), filtered, and evaporated. The crude product was purified with flash column chromatography (silica gel, 20% CH<sub>2</sub>Cl<sub>2</sub> in hexanes (500 mL)) to afford **1t** (149 mg, 0.61 mmol, 61%) as a dark solid. <sup>1</sup>H NMR (400 MHz, CDCl<sub>3</sub>) δ 6.99 (d, *J* = 7.6 Hz, 1H), 7.26-7.33 (m, 2H), 7.45-7.52 (m, 3H), 7.70-7.72 (m, 2H), 8.32-8.34 (m, 1H); <sup>13</sup>C NMR (100 MHz, CDCl<sub>3</sub>) δ 125.9, 126.1, 128.2, 130.0, 130.2 (2C), 130.3, 133.8, 136.0, 137.5 (2C), 145.6.

**General Procedure C: Synthesis of 1-(5-(2-Fluoroethoxy)-2-(4-methyl-2-nitrophenyl thio)-phenyl)-*N,N*-dimethylmethanamine (2a).**

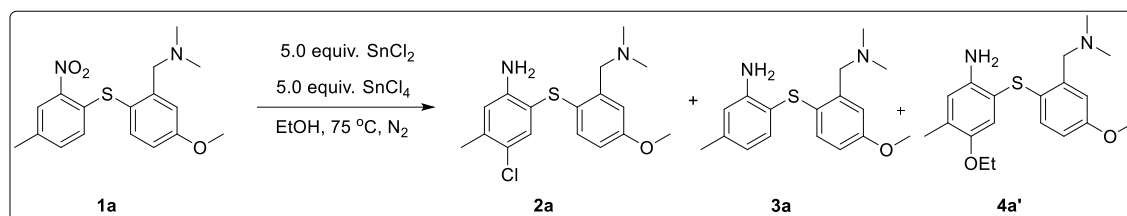

To a solution of compound **1a** (109 mg, 0.33 mmol) in ethanol (16.5 mL) and 2N HCl (1.7 mL) was added SnCl<sub>4</sub> (0.19 mL, 1.64 mmol) at rt. The reaction mixture was stirred at reflux temperature under N<sub>2</sub> for 0.5 h and SnCl<sub>2</sub> (31 mg, 0.16 mmol) was added every 0.5 h for six times at the same temperature. After 2 h, reaction completion was confirmed by TLC. Then, the mixture was evaporated and quenched with water (10 mL). The crude mixture was basified with 10% NaOH to pH > 12, extracted with CH<sub>2</sub>Cl<sub>2</sub> (25 mL × 3), washed with brine, dried over MgSO<sub>4</sub> and evaporated. The crude product was chromatographed (silica gel, 2-3% MeOH (with 10% NH<sub>4</sub>OH) in CH<sub>2</sub>Cl<sub>2</sub>) to afford a white oil **2a** (48.6 mg, 52%), **3a** (5.1 mg, 5%) and **4a'** (8 mg, 6%). **2a**: <sup>1</sup>H NMR (400 MHz, CDCl<sub>3</sub>) δ 2.28 (s, 3H), 2.29 (s, 6H), 3.53 (s, 2H), 3.77 (s, 3H), 6.56 (s, 1H), 6.69 (dd, *J* = 2.7, 8.6 Hz, 1H), 6.84 (d, *J* = 2.4 Hz, 1H), 6.97 (d, *J* = 8.6 Hz, 1H), 7.37 (s, 1H); <sup>13</sup>C NMR (100 MHz, CDCl<sub>3</sub>) δ 20.0, 45.2, 55.3, 62.5, 113.6, 115.7, 116.1, 117.1, 122.4, 126.7, 130.9, 135.8, 137.9, 139.1, 147.0, 158.1; ESIHRMS calcd. for C<sub>17</sub>H<sub>21</sub>ClN<sub>2</sub>NaOS [M+Na]<sup>+</sup>, 359.0961; found, 359.0957. **3a**: <sup>1</sup>H NMR (400 MHz, CDCl<sub>3</sub>) δ 2.26 (s, 3H), 2.30 (s, 6H), 3.55 (s, 2H), 3.75 (s, 3H), 6.52 (d, *J* = 6.0 Hz, 1H), 6.53 (s, 1H), 6.65 (dd, *J* = 2.8, 8.6 Hz, 1H), 6.85 (d, *J* = 2.8 Hz, 1H), 6.89 (d, *J* = 8.6 Hz, 1H), 7.30 (d, *J* = 8.2 Hz, 1H); <sup>13</sup>C NMR (100 MHz, CDCl<sub>3</sub>) δ 21.3, 45.2, 55.3, 62.2, 113.4, 113.5, 115.79, 115.82, 119.3, 127.7, 129.9, 136.6, 138.5, 140.6, 148.3, 157.8; ESIHRMS calcd for C<sub>17</sub>H<sub>23</sub>N<sub>2</sub>OS [M+H]<sup>+</sup> and [M+Na]<sup>+</sup>, 303.1531 and 325.1351; found, 303.1512 and 325.1355. **4a'**: <sup>1</sup>H NMR (400 MHz, CDCl<sub>3</sub>) δ 1.36 (t, *J* = 7.0 Hz, 3H), 2.18 (s, 3H), 2.30 (s, 6H), 3.54 (s, 2H), 3.76 (s, 3H), 3.92 (q, *J* = 7.0 Hz, 2H), 6.58 (s, 1H), 6.66 (dd, *J* = 4.3, 13.0 Hz, 1H), 6.86 (d, *J* = 12.6 Hz, 1H), 6.86 (s, 1H), 6.91 (s, 1H); <sup>13</sup>C NMR (100 MHz, CDCl<sub>3</sub>) δ 15.0, 16.2, 45.3, 55.3, 62.3, 64.4, 113.47, 113.54, 115.8, 118.2, 119.6, 127.7, 129.4, 130.2, 138.4, 142.1, 149.9, 157.8; ESIHRMS calcd for C<sub>19</sub>H<sub>27</sub>N<sub>2</sub>O<sub>2</sub>S [M+H]<sup>+</sup> and C<sub>19</sub>H<sub>26</sub>N<sub>2</sub>NaO<sub>2</sub>S [M+Na]<sup>+</sup>, 347.1793 and 369.1613; found, 347.1807 and 369.1623.



## Synthesis of 4-Chloro-2-((4-methoxyphenyl)thio)-5-methylaniline (**2b**) and 2-((4-Methoxyphenyl)thio)-5-methylaniline (**3b**)

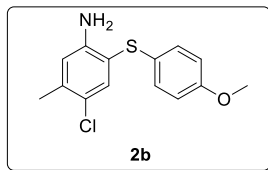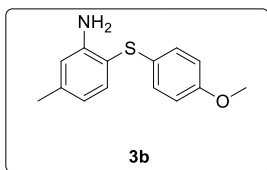

Compound **2b** & **3b** were synthesized using (4-methoxyphenyl)(4-methyl-2-nitrophenyl)sulfane (**1b**) following general procedure C for 2 h as white color solid **2w** and yellow color solid **3w** with 54% and 24% yield, respectively. **2b**: mp = 74-76°C; <sup>1</sup>H NMR (600 MHz, CDCl<sub>3</sub>) δ 7.36 (s, 1H), 7.17 – 7.12 (m, 2H), 6.83 – 6.78 (m, 2H), 6.65 (s, 1H), 3.76 (s, 3H), 2.28 (s, 3H); <sup>13</sup>C NMR (151 MHz, CDCl<sub>3</sub>) δ 158.60, 146.12, 138.28, 135.59, 130.03, 126.28, 123.45, 117.59, 115.96, 114.90, 55.37, 20.03; ESIHRMS calcd for C<sub>19</sub>H<sub>27</sub>N<sub>2</sub>O<sub>2</sub>S [M+H]<sup>+</sup> and C<sub>19</sub>H<sub>26</sub>N<sub>2</sub>NaO<sub>2</sub>S [M+Na]<sup>+</sup>, 347.1793 and 369.1613. **3b**: mp = 48-50°C. <sup>1</sup>H NMR (600 MHz, CDCl<sub>3</sub>) δ 7.30 (d, *J* = 7.7 Hz, 1H), 7.09 (d, *J* = 8.8 Hz, 2H), 6.77 (d, *J* = 8.8 Hz, 2H), 6.56 (d, *J* = 12.0 Hz, 1H), 6.55 (d, *J* = 7.7 Hz, 1H), 3.74 (s, 3H), 2.26 (s, 3H); <sup>13</sup>C NMR (151 MHz, CDCl<sub>3</sub>) δ 158.23, 148.28, 141.09, 136.77, 129.15, 127.66, 119.97, 116.11, 114.85, 113.23, 55.44, 21.50; ESIHRMS calcd. for C<sub>19</sub>H<sub>27</sub>N<sub>2</sub>O<sub>2</sub>S [M+H]<sup>+</sup> and C<sub>19</sub>H<sub>26</sub>N<sub>2</sub>NaO<sub>2</sub>S [M+Na]<sup>+</sup>, 347.1793 and 369.1613; found, 347.1807 and 369.1623.

## Synthesis of 4-Chloro-2-(phenylthio)aniline (**2c**)<sup>14</sup> and 2-(Phenylthio)aniline (**3c**).

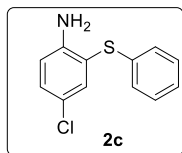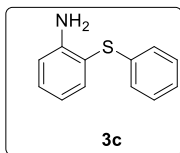

Compounds **2c** & **3c** were synthesized using (2-nitrophenyl)(phenyl)sulfane (**1c**) following general procedure C for 2 h to afford **2c** & **3c** as brown oils. **2c**: <sup>1</sup>H NMR (600 MHz, CDCl<sub>3</sub>) δ 7.43 (d, *J* = 2.4 Hz, 1H), 7.26-7.23 (m, 2H), 7.19-7.13 (m, 2H), 7.13-7.08 (m, 2H), 6.71 (d, *J* = 8.6 Hz, 1H), 4.28 (s, 2H); <sup>13</sup>C NMR (150 MHz, CDCl<sub>3</sub>) δ 147.38, 136.25, 135.88, 131.03, 129.30, 127.15, 126.10, 122.70, 116.41, 116.28. **3c**: <sup>1</sup>H NMR (600 MHz, CDCl<sub>3</sub>) δ 7.45 (dd, *J* = 7.7, 1.3 Hz, 1H), 7.29-7.18 (m, 3H), 7.15-7.03 (m, 3H), 6.81-6.73 (m, 2H), 4.28 (s, 2H); <sup>13</sup>C NMR (150 MHz, CDCl<sub>3</sub>) δ 148.97, 137.61, 136.96, 131.27, 129.14, 126.62, 125.56, 118.89, 115.50, 114.53.

### Synthesis of 4-Chloro-5-methyl-2-(phenylthio)aniline (**2d**) and 5-Methyl-2-(phenylthio)aniline (**3d**).

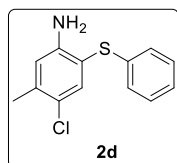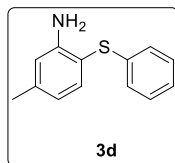

Compounds **2d** & **3d** were synthesized using (4-methyl-2-nitrophenyl)(phenyl)sulfane (**1d**) following general procedure **C** for 2 h to afford **2d** as a green semi-solid and **3d** as a brown oil. **2d**:  $^1\text{H NMR}$  (600 MHz,  $\text{CDCl}_3$ )  $\delta$  7.43 (s, 1H), 7.24 - 7.20 (m, 2H), 7.15 - 7.07 (m, 3H), 6.66 (s, 1H), 4.20 (s, 2H), 2.31 (s, 3H);  $^{13}\text{C NMR}$  (150 MHz,  $\text{CDCl}_3$ )  $\delta$  147.51, 139.25, 136.84, 136.47, 129.21, 126.70, 125.80, 123.23, 117.45, 113.20, 20.25; ESIHRMS calcd. for  $\text{C}_{13}\text{H}_{13}\text{ClNS}$   $[\text{M}+\text{H}]^+$ , 250.0457; found, 250.0457. **3d**:  $^1\text{H NMR}$  (600 MHz,  $\text{CDCl}_3$ )  $\delta$  7.34 (d,  $J = 7.8$  Hz, 1H), 7.21 (t,  $J = 7.7$  Hz, 2H), 7.10 (dd,  $J = 7.8, 3.0$  Hz, 1H), 7.07 (dd,  $J = 5.7, 4.7$  Hz, 2H), 6.62 (s, 1H), 6.59 (dd,  $J = 7.6, 1.7$  Hz, 1H), 4.22 (s, 2H), 2.30 (s, 3H);  $^{13}\text{C NMR}$  (150 MHz,  $\text{CDCl}_3$ )  $\delta$  148.91, 141.76, 137.61, 129.08, 126.29, 125.34, 120.08, 116.66, 116.11, 111.15, 21.60.

### Synthesis of 4-Chloro-5-fluoro-2-(phenylthio)aniline (**2e**) and 5-Fluoro-2-(phenylthio)aniline (**3e**)

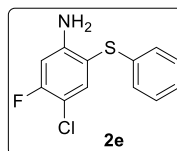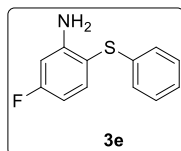

Compound **2e** & **3e** were synthesized using (4-fluoro-2-nitrophenyl)(phenyl)sulfane (**1e**) following general procedure **C** for 1 h as brown color solid **2e** and pale-yellow solid **3e** with 20% and 67% yield, respectively. **2e**: mp = 95-90°C;  $^1\text{H NMR}$  (600 MHz,  $\text{CDCl}_3$ )  $\delta$  7.50 (d,  $J = 8.0$  Hz, 1H), 7.24 (t,  $J = 7.2$  Hz, 2H), 7.15 (t,  $J = 7.4$  Hz, 1H), 7.08 (d,  $J = 7.6$  Hz, 2H), 6.57 (d,  $J = 10.6$  Hz, 1H), 4.42 (s, 2H);  $^{13}\text{C NMR}$  (151 MHz,  $\text{CDCl}_3$ )  $\delta$  160.35 ( $J_F = 249.15$ ), 149.47 ( $J_F = 10.57$ ), 138.52, 135.84, 129.19, 126.56, 125.96, 110.92, 109.39 ( $J_F = 18.12$ ), 102.91 ( $J_F = 24.16$ ); ESIHRMS calcd for  $\text{C}_{19}\text{H}_{27}\text{N}_2\text{O}_2\text{S}$   $[\text{M}+\text{H}]^+$  and  $\text{C}_{19}\text{H}_{26}\text{N}_2\text{NaO}_2\text{S}$   $[\text{M}+\text{Na}]^+$ , 347.1793 and 369.1613; found, 347.1807 and 369.1623. **3e**: mp = 55-57°C.  $^1\text{H NMR}$  (600 MHz,  $\text{CDCl}_3$ )  $\delta$  7.42 (t,  $J = 7.2$  Hz, 1H), 7.21 (t,  $J = 7.7$  Hz, 2H), 7.10 (t,  $J = 7.4$  Hz, 1H), 7.05 (d,  $J = 7.8$  Hz, 2H), 6.55 - 6.40 (m, 2H), 4.40 (s, 2H);  $^{13}\text{C NMR}$  (151 MHz,  $\text{CDCl}_3$ )  $\delta$  165.01 ( $J_F = 247.64$ ), 150.54 ( $J_F = 12.08$ ), 139.35 ( $J_F = 6.04$ ), 136.79, 129.05, 126.13, 125.49, 109.51, 105.81 ( $J_F = 21.14$ ), 101.91 ( $J_F = 25.67$ ). ESIHRMS calcd for  $\text{C}_{19}\text{H}_{27}\text{N}_2\text{O}_2\text{S}$   $[\text{M}+\text{H}]^+$  and  $\text{C}_{19}\text{H}_{26}\text{N}_2\text{NaO}_2\text{S}$   $[\text{M}+\text{Na}]^+$ , 347.1793 and 369.1613; found, 347.1807 and 369.1623.

**Synthesis of 4-Chloro-5-methoxy-2-(phenylthio)aniline (2f) and 5-Methoxy-2-(phenylthio)aniline (3f)**

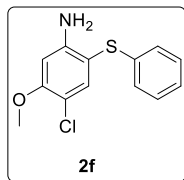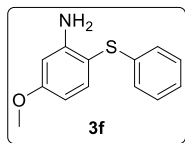

Compound **2f** & **3f** were synthesized using (4-Methoxy-2-nitrophenyl)(phenyl)sulfane (**1f**) following general procedure C for 2 h as yellow color solid **2f** and off-white color solid **3f** with 45% and 20% yield, respectively. **2f**: mp = 68-70°C;  $^1\text{H NMR}$  (600 MHz,  $\text{CDCl}_3$ )  $\delta$  7.46 (s, 1H), 7.22 (t,  $J = 7.5$  Hz, 2H), 7.11 (t,  $J = 7.3$  Hz, 1H), 7.06 (d,  $J = 7.7$  Hz, 2H), 6.36 (s, 1H), 4.35 (s, 2H), 3.88 (s, 3H);  $^{13}\text{C NMR}$  (151 MHz,  $\text{CDCl}_3$ )  $\delta$  157.32, 149.13, 138.19, 136.96, 129.05, 126.07, 125.49, 111.46, 105.92, 98.86, 56.11; ESIHRMS calcd for  $\text{C}_{19}\text{H}_{27}\text{N}_2\text{O}_2\text{S}$   $[\text{M}+\text{H}]^+$  and  $\text{C}_{19}\text{H}_{26}\text{N}_2\text{NaO}_2\text{S}$   $[\text{M}+\text{Na}]^+$ , 347.1793 and 369.1613; found, 347.1807 and 369.1623. **3f**: mp = 90-92°C;  $^1\text{H NMR}$  (600 MHz,  $\text{CDCl}_3$ )  $\delta$  7.37 (d,  $J = 8.4$  Hz, 1H), 7.20 (t,  $J = 7.4$  Hz, 2H), 7.06 (t,  $J = 12.8$  Hz, 3H), 6.40 – 6.31 (m, 2H), 4.31 (s, 2H), 3.79 (s, 3H);  $^{13}\text{C NMR}$  (151 MHz,  $\text{CDCl}_3$ )  $\delta$  162.42, 150.33, 139.02, 137.86, 128.94, 125.78, 125.10, 105.67, 105.22, 100.32, 55.27; ESIHRMS calcd for  $\text{C}_{19}\text{H}_{27}\text{N}_2\text{O}_2\text{S}$   $[\text{M}+\text{H}]^+$  and  $\text{C}_{19}\text{H}_{26}\text{N}_2\text{NaO}_2\text{S}$   $[\text{M}+\text{Na}]^+$ , 347.1793 and 369.1613; found, 347.1807 and 369.1623.

**Synthesis of 4-Chloro-2-(phenylthio)-5-(trifluoromethyl)aniline (2g) and 2-(Phenylthio)-5-(trifluoromethyl)aniline (3g).**

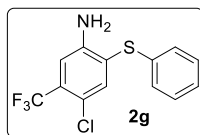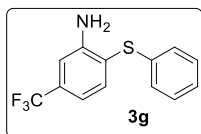

Compounds **2g** & **3g** were synthesized using (2-nitro-4-(trifluoromethyl)phenyl)(phenyl)sulfane (**1g**) following general procedure C for 2 h to afford **2g** as a off-white solid and **3g** as a yellow oil. **2g**: mp = 48 - 49 °C;  $^1\text{H NMR}$  (600 MHz,  $\text{CDCl}_3$ )  $\delta$  7.48 (s, 1H), 7.29 (t,  $J = 7.6$  Hz, 2H), 7.25-7.20 (m, 1H), 7.18 (dd,  $J = 5.2, 3.3$  Hz, 2H), 7.05 (s, 1H), 4.41 (s, 2H);  $^{13}\text{C NMR}$  (150 MHz,  $\text{CDCl}_3$ )  $\delta$  146.50, 137.83, 134.04, 129.59, 128.49, 127.05, 120.96, 119.72, 113.88; ESIHRMS calcd. for  $\text{C}_{13}\text{H}_{10}\text{ClF}_3\text{NS}$   $[\text{M}+\text{H}]^+$ , 304.0175; found, 304.0179. **3g**:  $^1\text{H NMR}$  (600 MHz,  $\text{CDCl}_3$ )  $\delta$  7.50 (d,  $J = 8.0$  Hz, 1H), 7.33 – 7.21 (m, 2H), 7.21 – 7.15 (m, 1H), 7.14 – 7.06 (m, 2H), 6.98 (s, 1H), 6.98 – 6.94 (m, 1H), 4.54 – 4.36 (m, 2H);  $^{13}\text{C NMR}$  (150 MHz,  $\text{CDCl}_3$ )  $\delta$  148.49, 137.19, 135.25, 132.81 (d,  $J = 32.4$ ), 129.38, 127.67, 126.40, 124.02 (d,  $J = 272.6$  Hz), 119.19, 114.96, 111.76.

**Synthesis of 6-Chloro-*N,N*-dimethyl-4-(phenylthio)benzene-1,3-diamine (2h) and *N,N*-Dimethyl-4-(phenylthio)benzene-1,3-diamine (3h).**

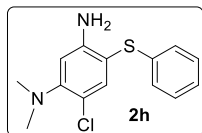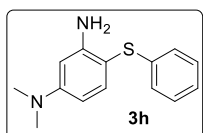

Compound **2h** & **3h** were synthesized using *N,N*-dimethyl-3-nitro-4-(phenylthio)aniline (**1h**) following general procedure **C** for 2 h to afford **2h** as a brown semi-solid and

**3h** as a brown semi-solid. **2h**:  $^1\text{H NMR}$  (600 MHz,  $\text{CDCl}_3$ )  $\delta$  7.43 (s, 1H), 7.17 – 7.24 (m, 2H), 7.04 – 7.13 (m, 3H), 6.44 (s, 1H), 6.16 (dd,  $J = 8.6, 2.7$  Hz, 1H), 2.83 (s, 6H);  $^{13}\text{C NMR}$  (150 MHz,  $\text{CDCl}_3$ )  $\delta$  153.04, 148.55, 137.07, 129.15, 126.33, 125.59, 125.55, 116.55, 107.81, 106.27, 43.62; ESIHRMS calcd. for  $\text{C}_{14}\text{H}_{15}\text{ClN}_2\text{S}$   $[\text{M}+\text{H}]^+$ , 279.0723; found, 279.0732.

**3h**:  $^1\text{H NMR}$  (600 MHz,  $\text{CDCl}_3$ )  $\delta$  7.30 (d,  $J = 8.6$  Hz, 1H), 7.21 – 7.17 (m, 2H), 7.09 – 7.02 (m, 3H), 6.20 (dd,  $J = 8.6, 2.7$  Hz, 1H), 6.11 (d,  $J = 2.7$  Hz, 1H), 4.23 (s, 2H), 2.97 (s, 6H);  $^{13}\text{C NMR}$  (150 MHz,  $\text{CDCl}_3$ )  $\delta$  153.13, 150.16, 139.12, 138.82, 128.94, 125.59, 124.84, 104.34, 100.78, 98.20, 40.39.

**Synthesis of 4-Chloro-3-methyl-2-(phenylthio)aniline (2i) and 3-Methyl-2-(phenylthio)aniline (3i).**

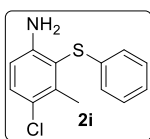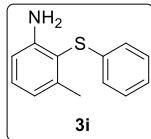

Compound **2i** & **3i** were synthesized using (2-methyl-6-nitro phenyl) (phenyl)sulfane (**1i**) following general procedure **C** for 2 h to afford

**2i** as a brown semi-solid and **3i** as a white solid. **2i**:  $^1\text{H NMR}$  (600 MHz,  $\text{CDCl}_3$ )  $\delta$  7.21 (t,  $J = 7.8$  Hz, 3H), 7.11 (t,  $J = 7.0$  Hz, 1H), 7.00 (d,  $J = 7.8$  Hz, 2H), 6.63 (d,  $J = 8.6$  Hz, 1H), 4.42 (s, 2H), 2.49 (s, 3H);  $^{13}\text{C NMR}$  (150 MHz,  $\text{CDCl}_3$ )  $\delta$  148.51, 141.83, 136.03, 131.35, 129.14, 125.77, 125.39, 123.46, 113.56, 18.97; ESIHRMS calcd. for  $\text{C}_{13}\text{H}_{12}\text{ClNS}$   $[\text{M}+\text{H}]^+$ , 250.0457; found, 250.0462. **3i**: mp = 63 - 65 °C;  $^1\text{H NMR}$  (600 MHz,  $\text{CDCl}_3$ )  $\delta$  7.22 – 7.16 (m, 2H), 7.13 (d,  $J = 7.7$  Hz, 1H), 7.08 (t,  $J = 7.4$  Hz, 1H), 7.03 – 6.98 (m, 2H), 6.74 – 6.69 (m, 1H), 6.66 (dd,  $J = 8.1, 0.7$  Hz, 1H), 4.36 (s, 2H), 2.38 (s, 3H).  $^{13}\text{C NMR}$  (150 MHz,  $\text{CDCl}_3$ )  $\delta$  149.87, 144.84, 136.82, 130.67, 129.13, 125.71, 125.12, 120.19, 113.84, 113.02, 21.71.

## Synthesis of (5-Chloro-2-nitrophenyl)(propyl)sulfane (2l) and (5-Chloro-2-nitrophenyl)(propyl)sulfane (3l)

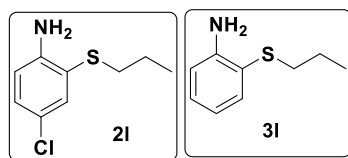

Compound **2l** & **3l** were synthesized using (2-nitrophenyl)(propyl)sulfane (**1l**) following general procedure C for 2 h as colorless oil **2l** and colorless oil **3l** with 63% and 21% yield, respectively. **2l**:  $^1\text{H NMR}$  (600 MHz,  $\text{CDCl}_3$ )  $\delta$  7.33 (d,  $J = 2.4$  Hz, 1H), 7.05 (dd,  $J = 8.5, 2.4$  Hz, 1H), 6.64 (d,  $J = 8.5$  Hz, 1H), 4.31 (s, 2H), 2.84 – 2.64 (m, 2H), 1.64 – 1.53 (m, 2H), 0.99 (t,  $J = 7.3$  Hz, 3H);  $^{13}\text{C NMR}$  (151 MHz,  $\text{CDCl}_3$ )  $\delta$  146.54, 134.28, 129.12, 122.42, 119.94, 115.71, 36.83, 22.91, 13.30; ESIHRMS calcd for  $\text{C}_{19}\text{H}_{27}\text{N}_2\text{O}_2\text{S}$   $[\text{M}+\text{H}]^+$  and  $\text{C}_{19}\text{H}_{26}\text{N}_2\text{NaO}_2\text{S}$   $[\text{M}+\text{Na}]^+$ , 347.1793 and 369.1613; found, 347.1807 and 369.1623. **3l**:  $^1\text{H NMR}$  (600 MHz,  $\text{CDCl}_3$ )  $\delta$  7.36 (dd,  $J = 7.7, 1.3$  Hz, 1H), 7.15 – 7.04 (m, 1H), 6.77 – 6.60 (m, 2H), 4.33 (s, 2H), 2.71 (t,  $J = 7.3$  Hz, 2H), 1.58 (dd,  $J = 14.7, 7.3$  Hz, 2H), 0.98 (t,  $J = 7.4$  Hz, 3H);  $^{13}\text{C NMR}$  (151 MHz,  $\text{CDCl}_3$ )  $\delta$  148.17, 135.72, 129.44, 118.46, 118.30, 114.86, 36.89, 23.01, 13.35. ESIHRMS calcd for  $\text{C}_{19}\text{H}_{27}\text{N}_2\text{O}_2\text{S}$   $[\text{M}+\text{H}]^+$  and  $\text{C}_{19}\text{H}_{26}\text{N}_2\text{NaO}_2\text{S}$   $[\text{M}+\text{Na}]^+$ , 347.1793 and 369.1613; found, 347.1807 and 369.1623.

## Synthesis of 4-Chloro-5-methyl-2-(propylthio)aniline (2m) and (4-Methyl-2-nitrophenyl)(propyl)sulfane (3m).

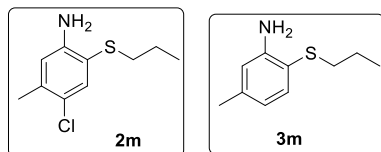

Compound **2m** & **3m** were synthesized using (4-methyl-2-nitrophenyl)(propyl)sulfane (**1m**) following general procedure C for 2 h to afford **2m** & **3m** as brown oils. **2m**:  $^1\text{H NMR}$  (600 MHz,  $\text{CDCl}_3$ )  $\delta$  7.33 (s, 1H), 6.60 (s, 1H), 4.26 (s, 2H), 2.73 – 2.64 (m, 2H), 2.26 (s, 3H), 1.57 (d,  $J = 7.4$  Hz, 2H), 0.98 (t,  $J = 7.3$  Hz, 2H);  $^{13}\text{C NMR}$  (150 MHz,  $\text{CDCl}_3$ )  $\delta$  146.91, 137.39, 135.39, 122.96, 117.03, 116.98, 37.29, 23.08, 20.07, 13.44; ESIHRMS calcd. for  $\text{C}_{10}\text{H}_{14}\text{ClN}$ s  $[\text{M}+\text{H}]^+$ , 216.0614; found, 216.0620. **3m**:  $^1\text{H NMR}$  (600 MHz,  $\text{CDCl}_3$ )  $\delta$  7.26 (d,  $J = 2.6$  Hz, 1H), 6.56 (d,  $J = 0.9$  Hz, 1H), 6.53 – 6.48 (m, 1H), 4.30 (s, 2H), 2.74 – 2.57 (m, 2H), 2.25 (s, 3H), 1.65 – 1.48 (m, 2H), 0.97 (t,  $J = 7.3$  Hz, 2H);  $^{13}\text{C NMR}$  (150 MHz,  $\text{CDCl}_3$ )  $\delta$  148.33, 139.98, 136.22, 119.66, 115.66, 115.08, 37.34, 23.14, 21.42, 13.45.

### Synthesis of 4-Chloro-5-fluoro-2-(propylthio)aniline (**2n**) and 5-Fluoro-2-(propylthio)aniline (**3n**).

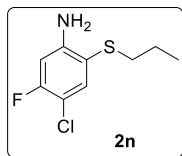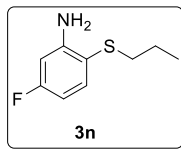

Compound **2n** & **3n** were synthesized using ((4-fluoro-2-nitrophenyl)(propyl)sulfane (**1n**) following general procedure **C** for 2 h to afford **2n** & **3n** as colorless oils. **2n**:  $^1\text{H NMR}$  (600 MHz,  $\text{CDCl}_3$ )  $\delta$  7.39 (d,  $J = 8.1$  Hz, 1H), 6.50 (d,  $J = 10.6$  Hz, 1H), 4.48 (s, 2H), 2.66 (dd,  $J = 7.6$ , 7.1 Hz, 2H), 1.56 (q,  $J = 7.7$  Hz, 2H), 0.98 (t,  $J = 7.3$  Hz, 3H);  $^{13}\text{C NMR}$  (150 MHz,  $\text{CDCl}_3$ )  $\delta$   $^{13}\text{C NMR}$  (150 MHz,  $\text{CDCl}_3$ )  $\delta$  158.99 (d,  $J = 247.8$  Hz), 148.62 (d,  $J = 10.4$  Hz), 137.33, 114.56, 108.87, 102.48 (d,  $J = 24.7$  Hz), 37.46, 23.03, 13.39; ESIHRMS calcd. for  $\text{C}_9\text{H}_{11}\text{ClFNS}$   $[\text{M}+\text{H}]^+$ , 220.0363; found, 220.0362. **3n**:  $^1\text{H NMR}$  (600 MHz,  $\text{CDCl}_3$ )  $\delta$  7.34 - 7.31 (dd,  $J = 6.7$ , 8.1 Hz, 1H), 6.42 (dd,  $J = 10.5$ , 2.7 Hz, 1H), 6.38 (td,  $J = 8.5$ , 2.7 Hz, 1H), 4.49 (s, 2H), 2.73 - 2.20 (m, 2H), 1.69 - 1.40 (m, 2H), 1.13 - 0.84 (m, 3H);  $^{13}\text{C NMR}$  (150 MHz,  $\text{CDCl}_3$ ) 164.05 (d,  $J = 245.6$  Hz), 149.99 (d,  $J = 11.6$  Hz), 137.96 (d,  $J = 10.0$  Hz), 113.19, 105.31 (d,  $J = 22.0$  Hz), 101.35 (d,  $J = 25.2$  Hz), 37.29, 22.91, 13.28.

### Synthesis of 4-Chloro-2-phenoxyaniline (**2q**)<sup>14</sup> and 2-Phenoxyaniline (**3q**).

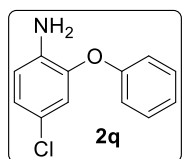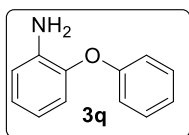

Compound **2q** & **3q** were synthesized using 1-nitro-2-phenoxybenzene (**1q**) following general procedure **C** for 90 minutes to afford **2q** as a brown oil and **3q** as an off-white solid. **2q**:  $^1\text{H NMR}$  (600 MHz,  $\text{CDCl}_3$ )  $\delta$  7.33 (t,  $J = 7.8$  Hz, 2H), 7.10 (td,  $J = 7.4$ , 0.5 Hz, 1H), 7.01 - 6.96 (m, 2H), 6.92 (dd,  $J = 8.5$ , 2.2 Hz, 1H), 6.82 (d,  $J = 2.3$  Hz, 1H), 6.72 (d,  $J = 8.5$  Hz, 1H), 3.80 (s, 2H);  $^{13}\text{C NMR}$  (150 MHz,  $\text{CDCl}_3$ )  $\delta$  156.79, 143.99, 137.30, 130.01, 124.54, 123.52, 122.78, 119.76, 117.85, 116.94. **3q**: mp = 42 - 44 °C;  $^1\text{H NMR}$  (600 MHz,  $\text{CDCl}_3$ )  $\delta$  7.32 - 7.26 (m, 2H), 7.04 (t,  $J = 7.4$  Hz, 1H), 6.98 - 6.95 (m, 3H), 6.87 (d,  $J = 1.1$  Hz, 1H), 6.80 (dd,  $J = 7.9$ , 1.4 Hz, 1H), 6.74 - 6.68 (m, 1H), 3.77 (s, 2H);  $^{13}\text{C NMR}$  (150 MHz,  $\text{CDCl}_3$ )  $\delta$  157.60, 143.16, 138.86, 129.81, 125.01, 122.73, 120.38, 118.86, 117.20, 117.58.

### Synthesis of 4-Chloro-5-methyl-2-phenoxyaniline (**2r**) and 5-Methyl-2-phenoxyaniline (**3r**)

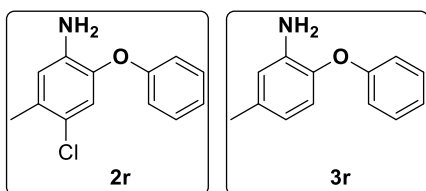

Compound **2r** & **3r** were synthesized using 4-methyl-2-nitro-1-phenoxybenzene (**1r**) following general procedure C for 3 h as brown color solid **2r** and off-white color solid **3r** with 72% and 20% yield, respectively. **2r**: mp = 52-54°C;  $^1\text{H}$  NMR (600 MHz,  $\text{CDCl}_3$ )  $\delta$  7.36 – 7.29 (m, 2H), 7.08 (dd,  $J = 10.6, 4.2$  Hz, 1H), 7.00 – 6.94 (m, 2H), 6.85 (s, 1H), 6.68 (s, 1H), 3.73 (s, 2H), 2.28 (s, 3H);  $^{13}\text{C}$  NMR (151 MHz,  $\text{CDCl}_3$ )  $\delta$  157.19, 141.54, 137.24, 132.20, 129.82, 123.01, 122.70, 120.55, 118.10, 117.16, 19.52; ESIHRMS calcd for  $\text{C}_{19}\text{H}_{27}\text{N}_2\text{O}_2\text{S}$   $[\text{M}+\text{H}]^+$  and  $\text{C}_{19}\text{H}_{26}\text{N}_2\text{NaO}_2\text{S}$   $[\text{M}+\text{Na}]^+$ , 347.1793 and 369.1613; found, 347.1807 and 369.1623. **3r**: mp = 36-38°C;  $^1\text{H}$  NMR (600 MHz,  $\text{CDCl}_3$ )  $\delta$  7.28 (t,  $J = 8.0$  Hz, 2H), 7.02 (t,  $J = 7.3$  Hz, 1H), 6.98 – 6.91 (m, 2H), 6.78 (d,  $J = 8.1$  Hz, 1H), 6.64 (s, 1H), 6.53 (d,  $J = 8.1$  Hz, 1H), 3.70 (s, 2H), 2.27 (s, 3H);  $^{13}\text{C}$  NMR (151 MHz,  $\text{CDCl}_3$ )  $\delta$  157.89, 140.64, 138.54, 134.82, 129.66, 122.33, 120.54, 119.45, 117.18, 116.67, 21.02; ESIHRMS calcd for  $\text{C}_{19}\text{H}_{27}\text{N}_2\text{O}_2\text{S}$   $[\text{M}+\text{H}]^+$  and  $\text{C}_{19}\text{H}_{26}\text{N}_2\text{NaO}_2\text{S}$   $[\text{M}+\text{Na}]^+$ , 347.1793 and 369.1613; found, 347.1807 and 369.1623.

### Synthesis of 4-Chloro-5-fluoro-2-phenoxyaniline (**2s**) and 5-Fluoro-2-phenoxyaniline (**3s**).

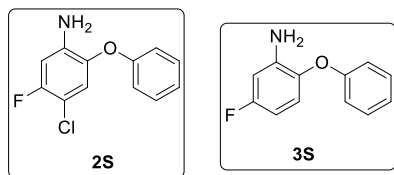

Compounds **2s** & **3s** were synthesized using 4-fluoro-2-nitro-1-phenoxybenzene (**1s**) following general procedure C for 2h to afford **2s** & **3s** as colorless oils; **2s**:  $^1\text{H}$  NMR (600 MHz,  $\text{CDCl}_3$ )  $\delta$  7.37 – 7.29 (m, 2H), 7.10 (tt,  $J = 7.7, 1.0$  Hz, 1H), 7.02 – 6.92 (m, 2H), 6.87 (d,  $J = 7.0$  Hz, 1H), 6.60 (d,  $J = 10.2$  Hz, 1H), 3.92 (s, 2H);  $^{13}\text{C}$  NMR (150 MHz,  $\text{CDCl}_3$ )  $\delta$  157.13,  $\delta$  155.27 (d,  $J = 243.0$  Hz), 139.25, 138.85 (d,  $J = 9.7$  Hz), 130.06, 123.44, 121.55, 117.23, 108.54 (d,  $J = 19.7$  Hz), 103.76 (d,  $J = 25.8$  Hz); ESIHRMS calcd. for  $\text{C}_{12}\text{H}_9\text{ClFNO}$   $[\text{M}+\text{H}]^+$ , 238.0435; found, 238.0440. **3s**:  $^1\text{H}$  NMR (600 MHz,  $\text{CDCl}_3$ )  $\delta$  7.31 – 7.27 (m, 2H), 7.04 (t,  $J = 7.4$  Hz, 1H), 6.95 – 6.91 (m, 2H), 6.82 (dd,  $J = 8.8, 5.4$  Hz, 1H), 6.51 (dd,  $J = 9.9, 2.9$  Hz, 1H), 6.42 – 6.37 (m, 1H), 3.87 (s, 2H);  $^{13}\text{C}$  NMR (150 MHz,  $\text{CDCl}_3$ )  $\delta$  160.21 (d,  $J = 240.5$  Hz), 157.82, 140.34 (d,  $J = 11.4$  Hz), 138.74, 129.83 (d,  $J = 13.2$  Hz), 122.74, 121.66 (d,  $J = 10.2$  Hz), 116.66, 104.76 (d,  $J = 23.5$  Hz), 103.11 (d,  $J = 26.6$  Hz).

### Synthesis of 4-Chloro-2-(phenylselanyl)aniline (**2t**)<sup>15</sup> and 2-(Phenylselanyl)aniline (**3t**).

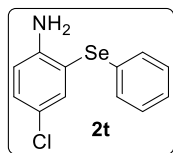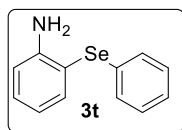

Compounds **2t** & **3t** were synthesized using (2-nitrophenyl)(phenyl)selane (**1t**) following general procedure **C** for 2h to afford **2t** as a brown oil and **3t** as a brown oil. **2t**: <sup>1</sup>H NMR (600 MHz, CDCl<sub>3</sub>) δ 7.55 (d, *J* = 2.4 Hz, 1H), 7.32 – 7.12 (m, 6H), 6.71 (d, *J* = 8.6 Hz, 1H), 4.27 (s, 2H); <sup>13</sup>C NMR (150 MHz, CDCl<sub>3</sub>) δ 147.19, 137.30, 130.93, 130.90, 129.95, 129.53, 126.80, 122.66, 115.98, 114.10. **3t**: <sup>1</sup>H NMR (600 MHz, CDCl<sub>3</sub>) δ 7.58 (dd, *J* = 7.6, 1.5 Hz, 1H), 7.25 – 7.12 (m, 6H), 6.80 (dd, *J* = 8.0, 1.3 Hz, 1H), 6.70 (td, *J* = 7.5, 1.3 Hz, 1H), 4.29 (s, 2H); <sup>13</sup>C NMR (150 MHz, CDCl<sub>3</sub>) δ 148.73, 138.70, 131.81, 131.20, 129.48, 129.39, 126.34, 118.97, 115.16, 112.88.

### Synthesis of 2-Bromo-4-chloroaniline (**2u**).<sup>16</sup>

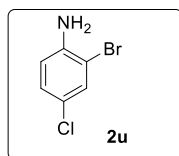

Compound **2u** was synthesized using 1-bromo-2-nitrobenzene (**1u**) following general procedure **C** for 2 h to afford **2u** as a white solid. **2u**: mp = 60 - 62 °C; <sup>1</sup>H NMR (600 MHz, CDCl<sub>3</sub>) δ 7.40 (d, *J* = 2.3 Hz, 1H), 7.07 (dd, *J* = 8.6, 2.3 Hz, 1H), 6.69 (d, *J* = 8.6 Hz, 1H), 4.08 (s, 2H); <sup>13</sup>C NMR (150 MHz, CDCl<sub>3</sub>) δ 142.98, 131.98, 128.49, 123.16, 116.34, 109.28.

### Synthesis of 2-Bromo-4-chloro-5-methylaniline (**2v**) and 2-Bromo-5-methylaniline (**3v**).

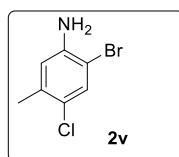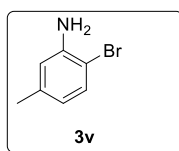

Compounds **2v** & **3v** were synthesized using 1-bromo-4-methyl-2-nitrobenzene (**1v**) following general procedure **C** for 2 h to afford **2v** as a white solid and **3v** as a colorless oil. **2v**: mp = 66 - 68 °C; <sup>1</sup>H NMR (600 MHz, CDCl<sub>3</sub>) δ 7.37 (s, 1H), 6.63 (d, *J* = 0.4 Hz, 1H), 3.99 (s, 2H), δ 2.24 (s, 3H); <sup>13</sup>C NMR (150 MHz, CDCl<sub>3</sub>) δ 142.71, 136.13, 131.91, 123.52, 117.36, 106.25, 19.76; ESIHRMS calcd. for C<sub>7</sub>H<sub>7</sub>BrClN [M+H]<sup>+</sup>, 219.9529; found, 219.9527. **3v**: <sup>1</sup>H NMR (600 MHz, CDCl<sub>3</sub>) δ 7.25 (d, *J* = 0.9 Hz, 1H), 6.59 (d, *J* = 1.2 Hz, 1H), 6.48 – 6.47 (m, 1H), 3.99 (s, 2H), 2.22 (s, 3H); <sup>13</sup>C NMR (150 MHz, CDCl<sub>3</sub>) δ 143.88, 138.53, 132.35, 120.64, 116.59, 106.28, 21.15.



**Synthesis of *N,N*-Dimethyl-2-(2-amino-4-methyl-5-bromophenylthio)-5-methoxybenzylamine (5a)**

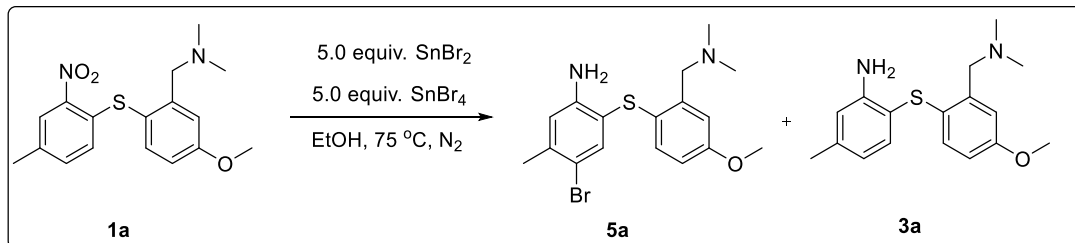

To a solution of compound **1a** (100 mg, 0.30 mmol) in EtOH (15 mL) and 2N HCl (1.5 mL) was added SnBr<sub>4</sub> (665 mg, 1.52 mmol) at rt. The reaction mixture was stirred at reflux temperature under N<sub>2</sub> for 0.5 h and SnBr<sub>2</sub> (42 mg, 0.15 mmol) was added every 0.5 h for seven times at the same temperature. Then the mixture was evaporated and quenched with water (10 mL). The crude mixture was basified with 10% NaOH to pH > 12, extracted with CH<sub>2</sub>Cl<sub>2</sub> (25 mL × 3), IPA/CH<sub>2</sub>Cl<sub>2</sub> (1/4, 10 mL × 2), washed with brine, dried over MgSO<sub>4</sub> and evaporated. The crude product was chromatographed (silica gel, 1-4% MeOH (with 10% NH<sub>4</sub>OH) in CH<sub>2</sub>Cl<sub>2</sub>) to afford a white oil **3a** (43.5 mg, 48%), **5a** (24.6 mg, 22%) <sup>1</sup>H NMR (400 MHz, CDCl<sub>3</sub>) δ 2.29 (s, 9H), 3.53 (s, 2H), 3.76 (s, 3H), 6.57 (s, 1H), 6.69 (dd, *J* = 2.9, 8.7 Hz, 1H), 6.83 (d, *J* = 2.8 Hz, 1H), 6.97 (d, *J* = 8.6 Hz, 1H), 7.55 (s, 1H); <sup>13</sup>C NMR (100 MHz, CDCl<sub>3</sub>) δ 22.8, 45.2, 55.3, 62.4, 111.5, 113.6, 116.1, 116.2, 117.1, 126.7, 131.0, 138.9, 139.1, 139.6, 147.6, 158.2; ESIHRMS calcd for C<sub>17</sub>H<sub>22</sub>BrN<sub>2</sub>OS [M+H]<sup>+</sup> and C<sub>17</sub>H<sub>21</sub>BrN<sub>2</sub>NaOS [M+Na]<sup>+</sup>, 381.0636 and 403.0456; found, 381.0650 and 403.0474.

**Synthesis of 1-(5-(2-Fluoroethoxy)-2-(4-methyl-2-nitrophenylthio)-phenyl)-*N,N*-dimethylmethanamine (9a).**

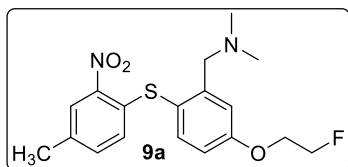

Compound **9a** was synthesized following general procedure A as a yellow oil with 73% yield. <sup>1</sup>H NMR (200 MHz, CDCl<sub>3</sub>) δ 2.19 (s, 6H), 2.35 (s, 3H), 3.49 (s, 2H), 4.31 (dt, *J* = 28.0, 4.1 Hz, 2H), 4.80 (dt, *J* = 47.3, 4.1 Hz, 2H), 6.53 (d, *J* = 8.3 Hz, 1H), 6.90 (dd, *J* = 8.5, 2.9 Hz, 1H), 7.12 (dd, *J* = 8.3, 1.9 Hz, 1H), 7.27-7.31 (m, 1H), 7.47 (d, *J* = 8.5 Hz, 1H), 8.06 (m, 1H), <sup>13</sup>C NMR (50 MHz, CDCl<sub>3</sub>) 20.5, 45.6 (2C), 61.1, 67.3 (d, *J* = 20.2 Hz), 81.9 (d, *J* = 170.1 Hz), 115.0, 115.9, 121.4, 126.1, 127.6, 134.7, 135.2, 136.6, 138.9, 144.7 146.1, 160.5; ESIHRMS calcd for C<sub>18</sub>H<sub>21</sub>FN<sub>2</sub>NaO<sub>3</sub>S [M+Na]<sup>+</sup>, 387.1155; found, 387.1141.

**Synthesis of 1-(5-(2-(2-(2-Fluoroethoxy)ethoxy)ethoxy)ethoxy)-2-((4-methyl-2-nitrophenyl)thio)phenyl)-N,N-dimethylmethanamine (9b).**

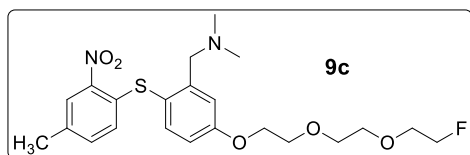

Compound **9b** was synthesized following general procedure A as a yellow oil with 72% yield. <sup>1</sup>H NMR (600 MHz, CDCl<sub>3</sub>) δ 2.27 (s, 3H), 2.28 (s, 6H), 3.52 (s, 2H), 3.69-3.73 (m, 5H), 3.77 (m, 1H), 3.83 (t, *J* = 4.8 Hz, 2H), 4.09 (t, *J* = 4.8 Hz, 2H), 4.56 (dt, *J* = 47.7, 4.2 Hz, 2H), 6.56 (s, 1H), 6.70 (dd, *J* = 8.6, 2.8 Hz, 1H), 6.87 (d, *J* = 2.8 Hz, 1H), 6.95 (d, *J* = 8.6 Hz, 1H), 7.36 (s, 1H); <sup>13</sup>C NMR (150 MHz, CDCl<sub>3</sub>) δ 20.1, 45.4, 45.4, 62.6, 67.7, 69.9, 70.6 (d, *J* = 19.5 Hz), 71.0, 71.0, 83.3 (d, *J* = 168.0 Hz), 114.5, 115.9, 116.9, 117.3, 122.6, 127.1, 131.1, 135.9, 138.1, 139.3, 147.1, 157.6; ESIHRMS calcd for C<sub>22</sub>H<sub>30</sub>ClFN<sub>2</sub>NaO<sub>3</sub>S [M+Na]<sup>+</sup>, 479.1547; found 479.1547.

**Synthesis of 4-Chloro-2-(2-((dimethylamino)methyl)-4-(2-fluoroethoxy)phenylthio)-5-methyl-benzenamine (10a) and 2-(2-((Dimethylamino)methyl)-4-(2-fluoroethoxy)phenylthio)-5-methyl-benzenamine (11a)**

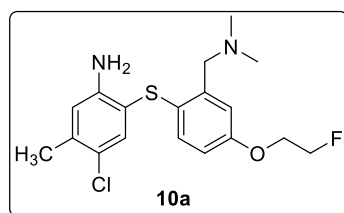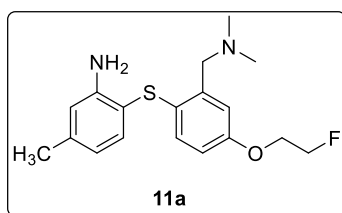

Compound **10a & 11a** were synthesized using 1-(5-(2-fluoroethoxy)-2-(4-methyl-2-nitrophenylthio)phenyl)-N,N-dimethylmethanamine (**9a**) following general procedure C as color loss oil **10a** and color loss oil **11a** with 18% and 36% yield, respectively. **10a**: <sup>1</sup>H NMR (600 MHz, CDCl<sub>3</sub>) δ 2.28 (s, 3H), 2.29 (s, 6H), 3.52 (s, 2H), 4.17 (dt, *J* = 27.7, 4.2 Hz, 2H), 4.51 (bs, 2H), 4.72 (dt, *J* = 47.4, 4.2 Hz, 2H), 6.57 (s, 1H), 6.70 (dd, *J* = 8.5, 2.8 Hz, 1H), 6.89 (d, *J* = 2.8 Hz, 1H), 6.96 (d, *J* = 8.6 Hz, 1H), 7.37 (s, 1H); <sup>13</sup>C NMR (150 MHz, CDCl<sub>3</sub>) δ 20.1, 45.4, 62.5, 67.4 (d, *J* = 21.0 Hz), 82.0 (d, *J* = 169.5 Hz), 114.4, 115.7, 116.9, 117.3, 122.7, 127.7, 131.0, 136.0, 138.2, 139.4, 147.2, 157.2; ESIHRMS calcd for C<sub>18</sub>H<sub>23</sub>ClFN<sub>2</sub>OS [M+H]<sup>+</sup>, 369.1204; found, 369.1218. **11a**: <sup>1</sup>H NMR (400 MHz, CDCl<sub>3</sub>) δ 2.27 (s, 3H), 2.30 (s, 6H), 3.54 (s, 2H), 4.16 (dt, *J* = 28.0, 4.1 Hz, 2H), 4.34 (bs, 2H), 4.71 (dt, *J* = 47.4, 4.1 Hz, 2H), 6.53-6.55 (m, 2H), 6.67 (dd, *J* = 8.6, 3.0 Hz, 1H), 6.87-6.90 (m, 2H), 7.30 (d, *J* = 8.0 Hz, 1H); <sup>13</sup>C NMR (100 MHz, CDCl<sub>3</sub>) δ 21.5, 45.5, 62.4, 67.3 (d, *J* = 20.0 Hz), 82.0 (d, *J* = 170.0 Hz), 113.3, 114.3, 116.0, 116.6, 119.6, 128.7, 129.9, 136.9, 138.8, 140.9, 148.6, 156.8; ESIHRMS calcd for C<sub>18</sub>H<sub>24</sub>FN<sub>2</sub>OS [M+H]<sup>+</sup>, 335.1593; found, 335.1593.

**Synthesis of 4-Chloro-2-(2-((dimethylamino)-methyl)-4-(2-(2-(2-fluoroethoxy)ethoxy)ethoxy)phenylthio)-5-methyl-benzenamine (10b) and 2-(2-((Dimethylamino)methyl)-4-(2-(2-(2-fluoroethoxy)ethoxy)ethoxy)-phenylthio)-5-methylbenzenamine (11b).**

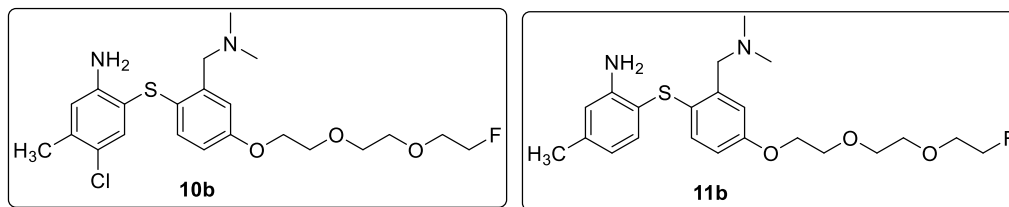

Compound **10b** & **11b** were synthesized using 1-(5-(2-(2-(2-fluoroethoxy)ethoxy)ethoxy)-2-((4-methyl-2-nitrophenyl)thio) phenyl)-N,N-dimethylmethanamine (**9c**) following general procedure C as color loss oil **10b** and color loss oil **11b** with 16% and 33% yield, respectively. **10b**:  $^1\text{H}$  NMR (600 MHz,  $\text{CDCl}_3$ )  $\delta$  2.27 (s, 3H), 2.28 (s, 6H), 3.52 (s, 2H), 3.69-3.73 (m, 5H), 3.77 (m, 1H), 3.83 (t,  $J = 4.8$  Hz, 2H), 4.09 (t,  $J = 4.8$  Hz, 2H), 4.56 (dt,  $J = 47.7, 4.2$  Hz, 2H), 6.56 (s, 1H), 6.70 (dd,  $J = 8.6, 2.8$  Hz, 1H), 6.87 (d,  $J = 2.8$  Hz, 1H), 6.95 (d,  $J = 8.6$  Hz, 1H), 7.36 (s, 1H);  $^{13}\text{C}$  NMR (150 MHz,  $\text{CDCl}_3$ ) 20.1, 45.4, 45.4, 62.6, 67.7, 69.9, 70.6 (d,  $J = 19.5$  Hz), 71.0, 71.0, 83.3 (d,  $J = 168.0$  Hz), 114.5, 115.9, 116.9, 117.3, 122.6, 127.1, 131.1, 135.9, 138.1, 139.3, 147.1, 157.6; ESIHRMS calcd for  $\text{C}_{22}\text{H}_{30}\text{ClFN}_2\text{NaO}_3\text{S}$   $[\text{M}+\text{Na}]^+$ , 479.1547; found 479.1547. **11b**:  $^1\text{H}$  NMR (400 MHz,  $\text{CDCl}_3$ )  $\delta$  2.26 (s, 3H), 2.29 (s, 6H), 3.53 (s, 2H), 3.64-3.73 (m, 5H), 3.80-3.85 (m, 3H), 4.06-4.10 (m, 2H), 4.55 (dt,  $J = 47.7, 4.2$  Hz, 2H), 6.52-6.54 (m, 2H), 6.67 (dd,  $J = 8.7, 2.8$  Hz, 1H), 6.87-6.89 (m, 2H), 7.30 (d,  $J = 7.5$  Hz, 1H);  $^{13}\text{C}$  NMR (100 MHz,  $\text{CDCl}_3$ )  $\delta$  21.5, 45.4, 45.4, 62.4, 67.6, 69.9, 70.6 (d,  $J = 19.0$  Hz), 71.0, 71.0, 83.3 (d,  $J = 168.0$  Hz), 113.5, 114.4, 116.0, 116.7, 119.6, 128.1, 130.0, 136.8, 138.7, 140.8, 148.4, 157.2; ESIHRMS calcd for  $\text{C}_{22}\text{H}_{32}\text{FN}_2\text{O}_3\text{S}$   $[\text{M}+\text{H}]^+$ , 423.2118; found, 423.2116.

## 4. References

1. a) Kumar, A.; Bhakuni, B. S.; Prasad, C. D.; Kumar, S.; Kumar, S. Potassium tert-butoxide-mediated synthesis of unsymmetrical diaryl ethers, sulfides, and selenides from aryl bromides. *Tetrahedron* **2013**, *69*, 5383-5392. b) Y.-Y. Huang, L.-T. Chang, H.-Y. Shen, Y.-H. Chen, K.-Y. Tzen, C.-Y. Shiue, L.-W. Hsin, *Bioorg. Chem.*, **2020**, *97*, 103654.
2. Yuan, H.; Beard, R. L.; Liu, X. X.; Donello, J. E.; Viswanath, V.; Garst, M. E. Benzofuran-2-sulfonamides derivatives as chemokine receptor modulators. *US20130231338 A1*, Sep 5, **2013**.
3. Crosignani, S.; Prêtre, A.; Jorand-Lebrun, C.; Fraboulet, G.; Seenisamy, J.; Augustine, J. K.; Missotten, M.; Humbert, Y.; Cleva, C.; Abla, N.; Daff, H.; Schott, O.; Schneider, M.; Burgat-Charvillon, F.; Rivron, D.; Hamernig, I.; Arrighi, J. F.; Gaudet, M.; Zimmerli, S. C.; Juillard, P.; Johnson, Z. Discovery of potent, selective, and orally bioavailable alkynylphenoxyacetic acid CRTH2 (DP2) receptor antagonists for the treatment of allergic inflammatory diseases. *J. Med. Chem.* **2011**, *54*, 7299–7317.
4. Zienkiewicz, J.; Kaszynski, P. Fused-ring thiadiazines: preparation and crystallographic characterization of 3-phenyl derivative of benzo-, pyridio[2,3-*e*]-pyrazino[2,3-*e*]-, and tetrafluorobenzo-[1,2,4]thiadiazines. *J. Org. Chem.* **2004**, *69*, 2551-2561.
5. Otsubo, K.; Ochi, Y.; Nakai, M.; Mori, A. Quinolone compound and pharmaceutical composition. *WO2008150029 A1*, Dec 11, **2008**.
6. Wassmundt, F. W.; Pedemonte, R. P. An improved synthesis of dibenzofurans by a free-radical. *J. Org. Chem.* **1996**, *60*, 4991-4994.
7. Wang, M.; Gao, M.; Hutchins, G. D.; Zheng Q. H. Synthesis of [<sup>11</sup>C]FEDAA1106 as a new PET imaging probe of peripheral benzodiazepine receptor expression. *Eur. J. Med. Chem.* **2009**, *44*, 2748–2753.
8. Bonnet, B.; Soullez, D.; Davioud-Charvet, E.; Landry, V.; Horvath, D.; Sergheraert, C.; New spermine and spermidine derivatives as potent inhibitors of *Trypanosoma cruzi* trypanothione reductase. *Bioorg. Med. Chem.* **1997**, *7*, 1249-1256.

9. Liu, C.; Zang, X.; Yu, B.; Yu, X.; Xu, Q. An efficient synthesis of unsymmetrical diaryl thionethers. *Synlett.* **2011**, 8, 1143–1148.
10. Moore, G. G. I.; Kenneth, H. J. Werkwijze ter bereiding van een herbicide verbinding. *DE2118190 A1*, Mar 9, **1972**.
11. Khalfina, I. A.; Rogozhnikova, O. Y.; Vlasov, V. M. Nucleophilic substitution of nitro group in 3,5-dinitrobenzotrifluoride. *Russ. J. Org. Chem.* **1996**, 32, 1325-1331.
12. Itoh, T.; Mase, T. A general palladium-catalyzed coupling of aryl bromides/triflates and thiols. *Org. Lett.* **2004**, 6, 4587-4590.
13. Pelz, K., Ernest, I.; Adlerová, E.; Metyšová J.; Protiva M. Neurotrope und psychotrope substanzen XXII. Weitere chloridivate des 10-(4-methylpiperazino)-10,11-dihydrodibenzo[*b,f*]thiepins und einige verwandte stoffe. *Collect. Czech. Chem. Commun.* **1968**, 33, 1852-1872.
14. H. Tian, H. Yang, C. Zhu and H. Fu, Arylthiolation of Arylamine Derivatives with (Arylthio)-pyrrolidine-2,5-diones. *Adv. Synth. Catal.*, 2015, **357**, 481-488.
15. J. Rodrigues, S. Saba, A. C. Joussef, J. Rafique and A. L. Braga, KIO<sub>3</sub>-Catalyzed C(sp<sup>2</sup>)-H Bond Selenylation/Sulfenylation of (Hetero)arenes: Synthesis of Chalcogenated (Hetero)arenes and their Evaluation for Anti-Alzheimer Activity. *Asian J. Org. Chem.*, 2018, **7**, 1819-1824.
16. A. A. Ageshina, G. A. Chesnokov, M. A. Topchiy, I. V. Alabugin, M. S. Nechaev and A. F. Asachenko, Making endo-cyclizations favorable again: a conceptually new synthetic approach to benzotriazoles via azide group directed lithiation/cyclization of 2-azidoaryl bromides. *Org. Biomol. Chem.*, 2019, **17**, 4523-4534.

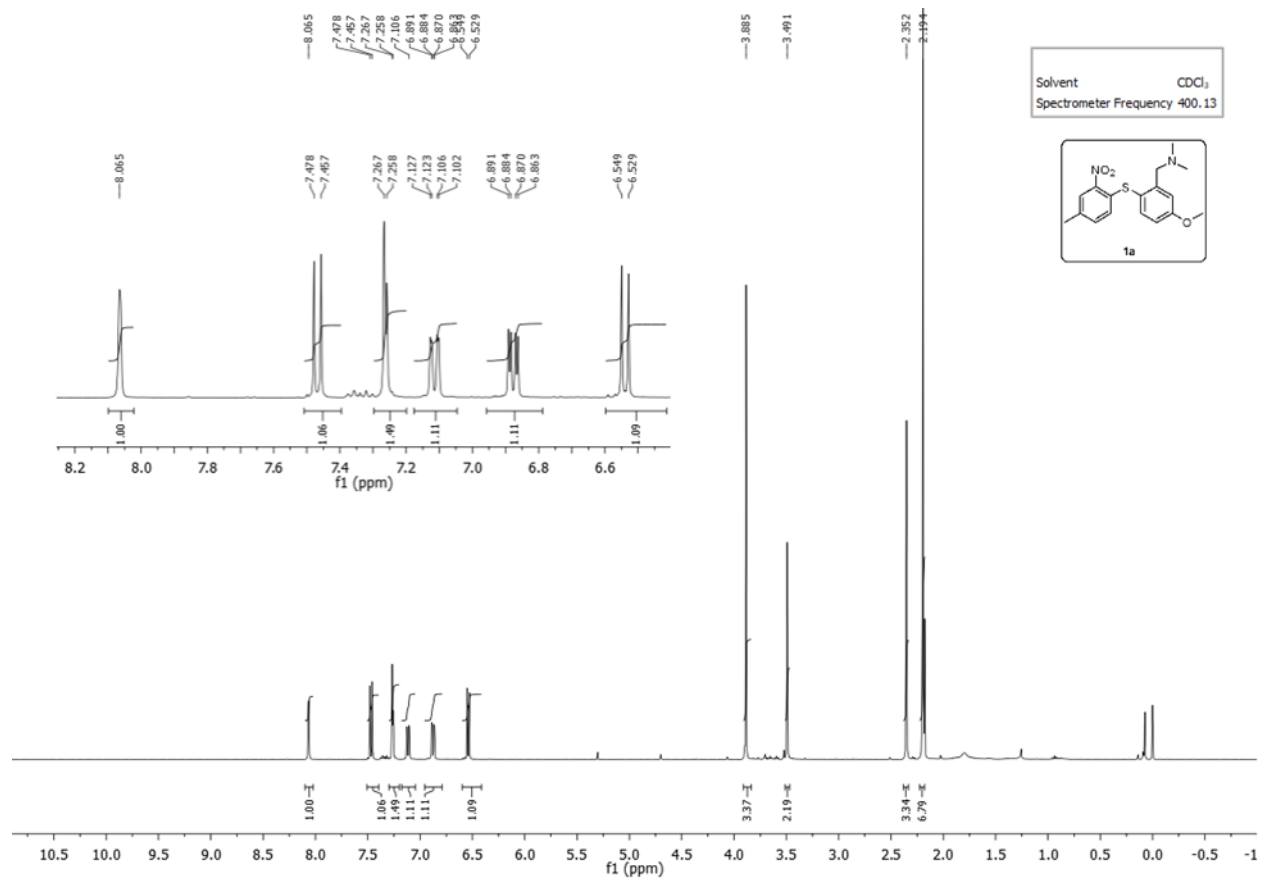

Compound **1a**,  $^1\text{H-NMR}$ , 100MHz,  $\text{CDCl}_3$

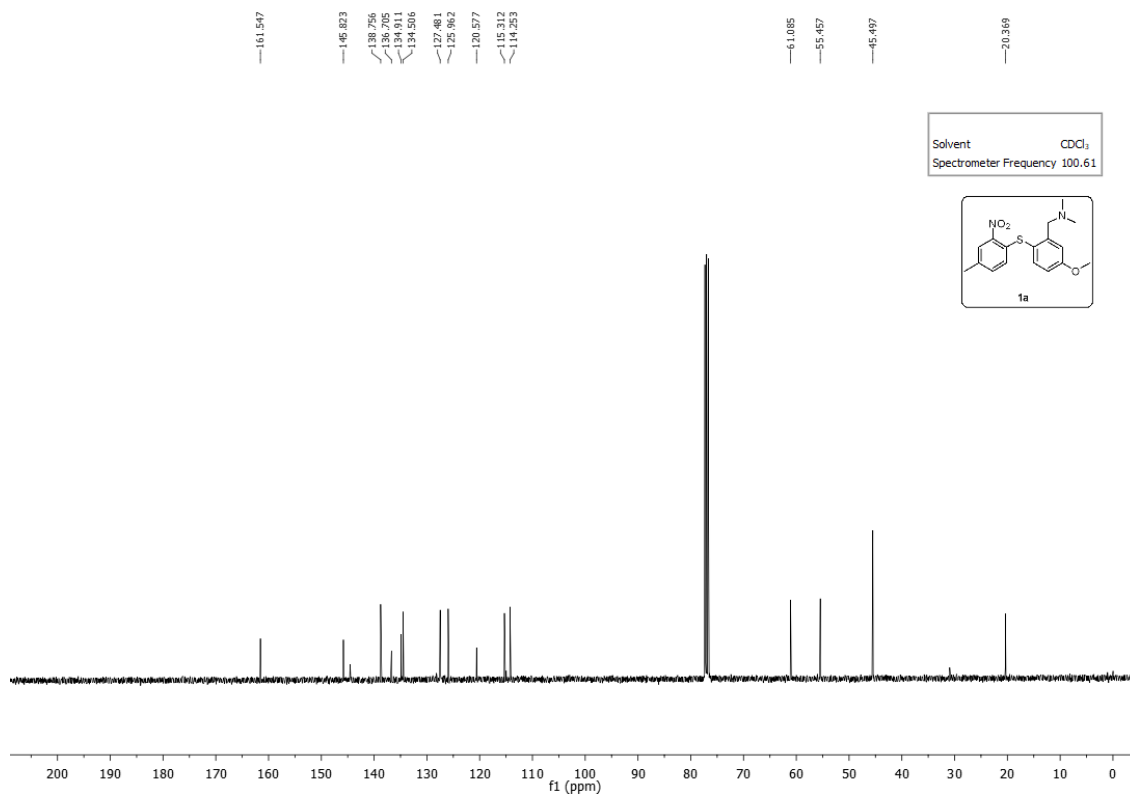

Compound **1a**,  $^{13}\text{C-NMR}$ , 100MHz,  $\text{CDCl}_3$

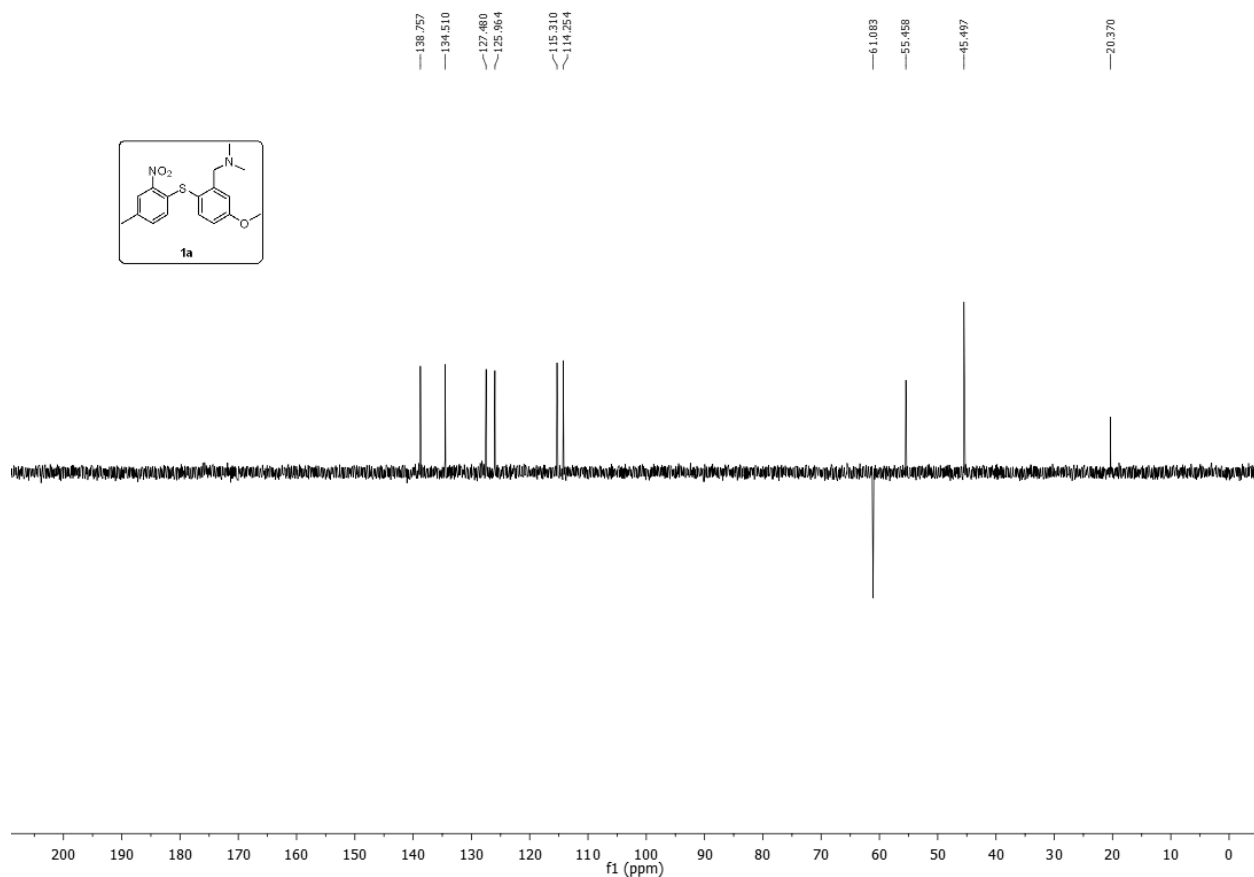

Compound **1a**, Dept135, 100MHz, CDCl<sub>3</sub>

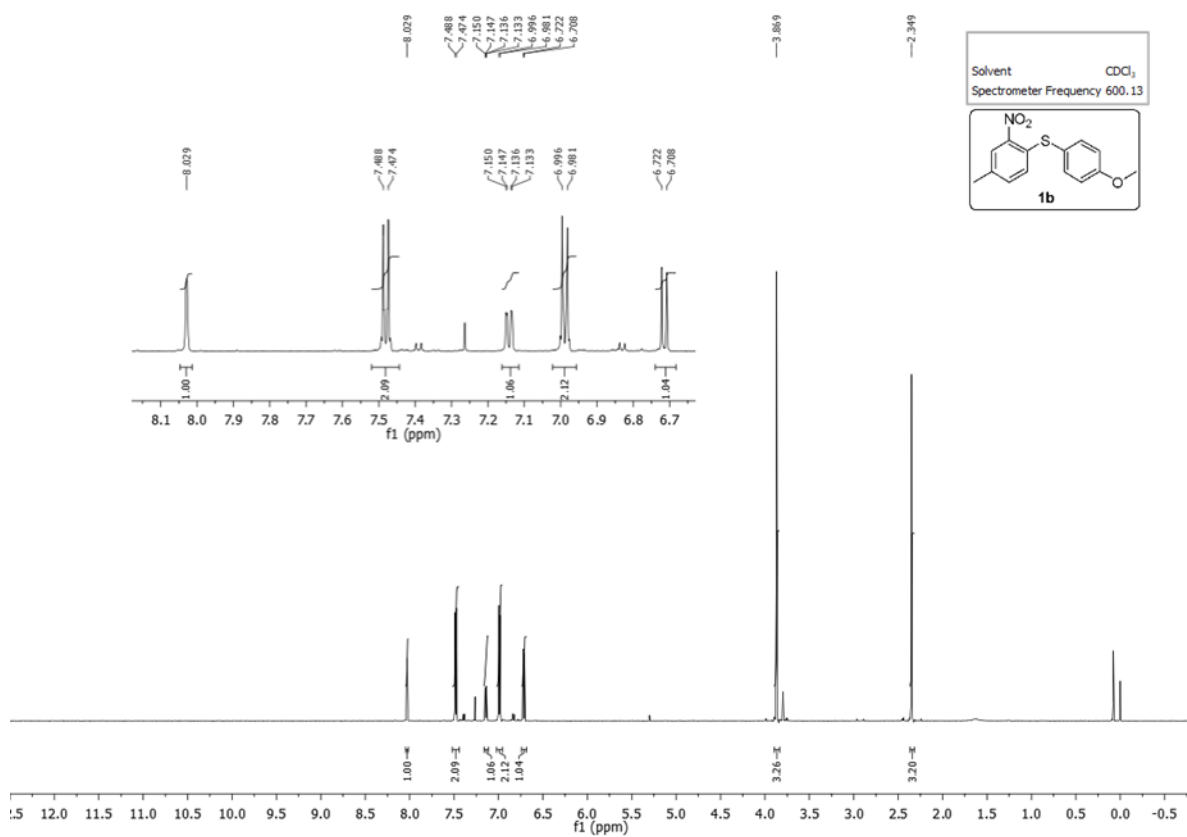

Compound **1b**, <sup>1</sup>H-NMR, 600MHz, CDCl<sub>3</sub>

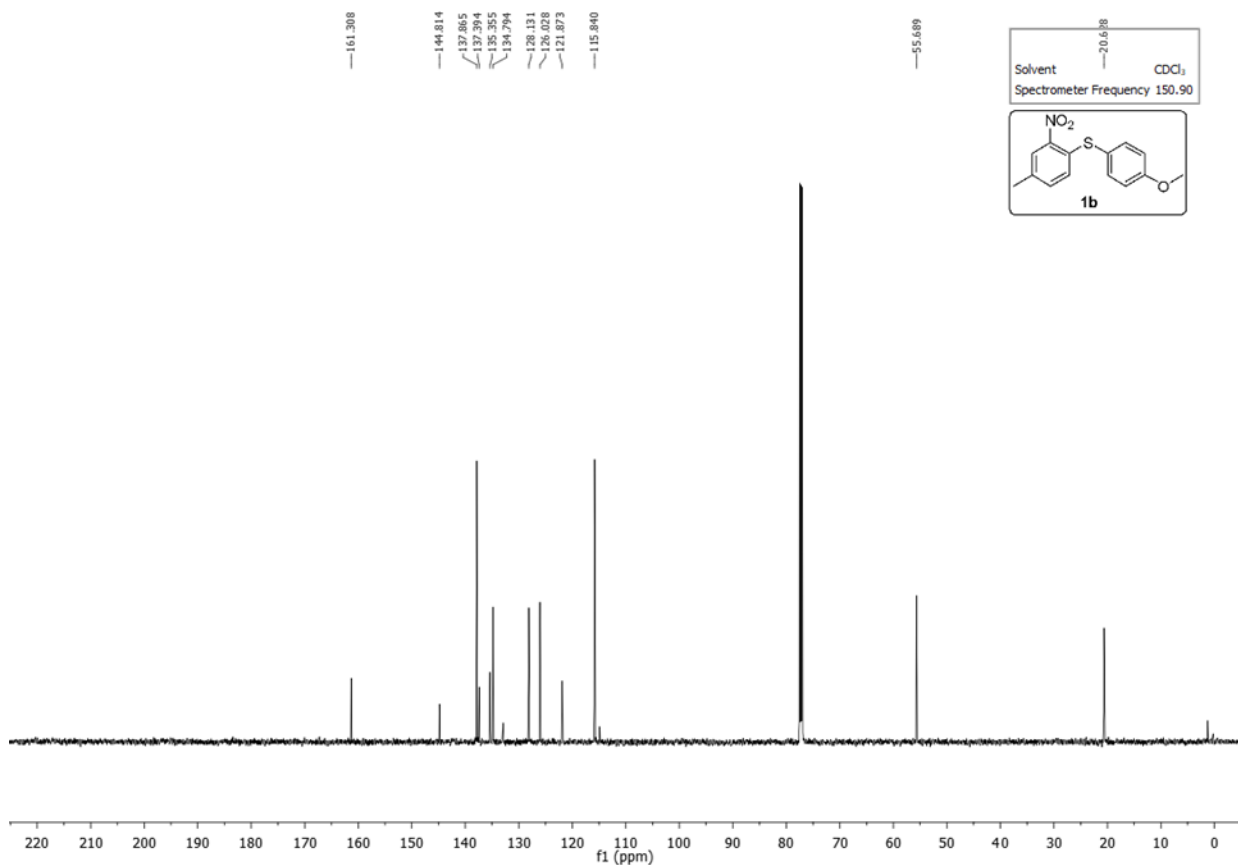

Compound **1b**, <sup>13</sup>C-NMR, 600MHz, CDCl<sub>3</sub>

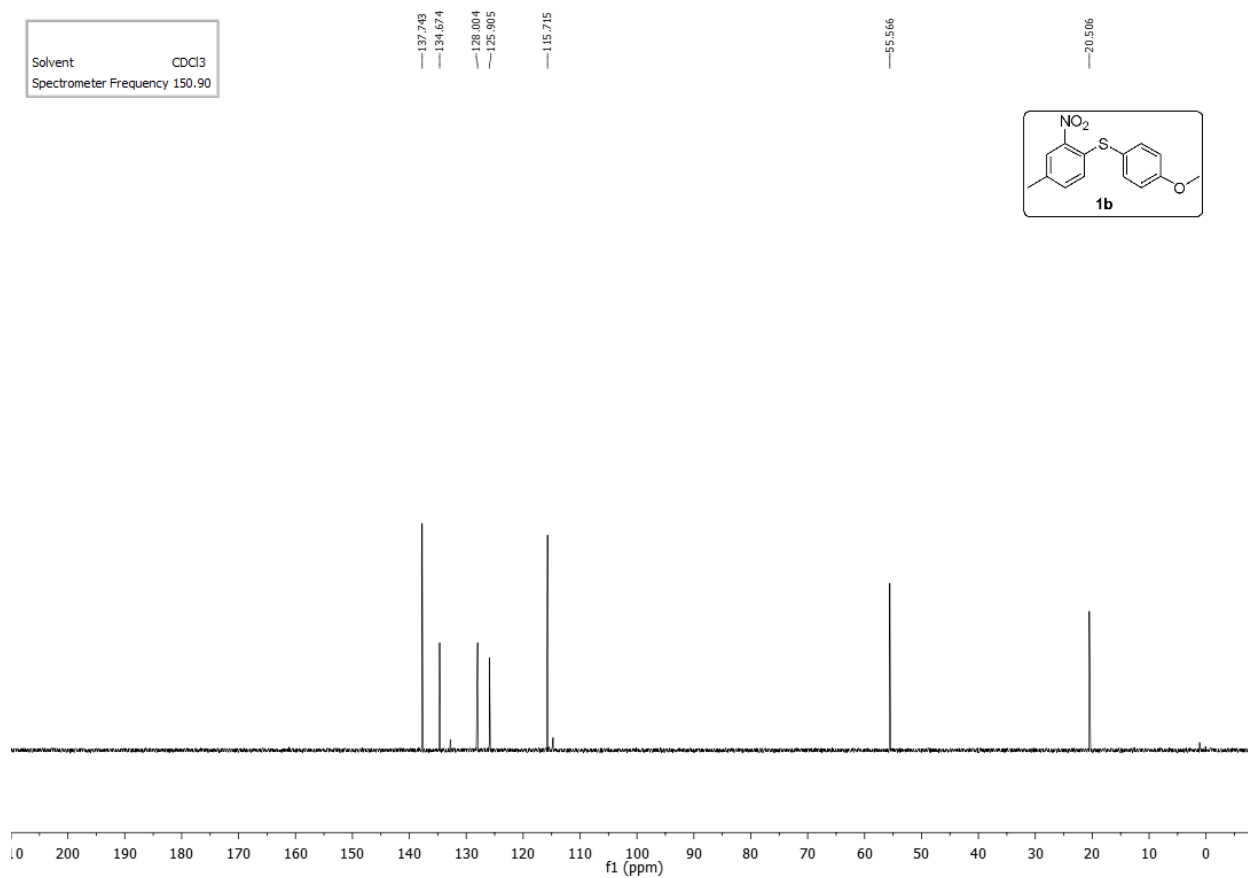

Compound **1b**, Dept135, <sup>13</sup>C-NMR, 155 MHz, CDCl<sub>3</sub>



compound 7 H CDCl3

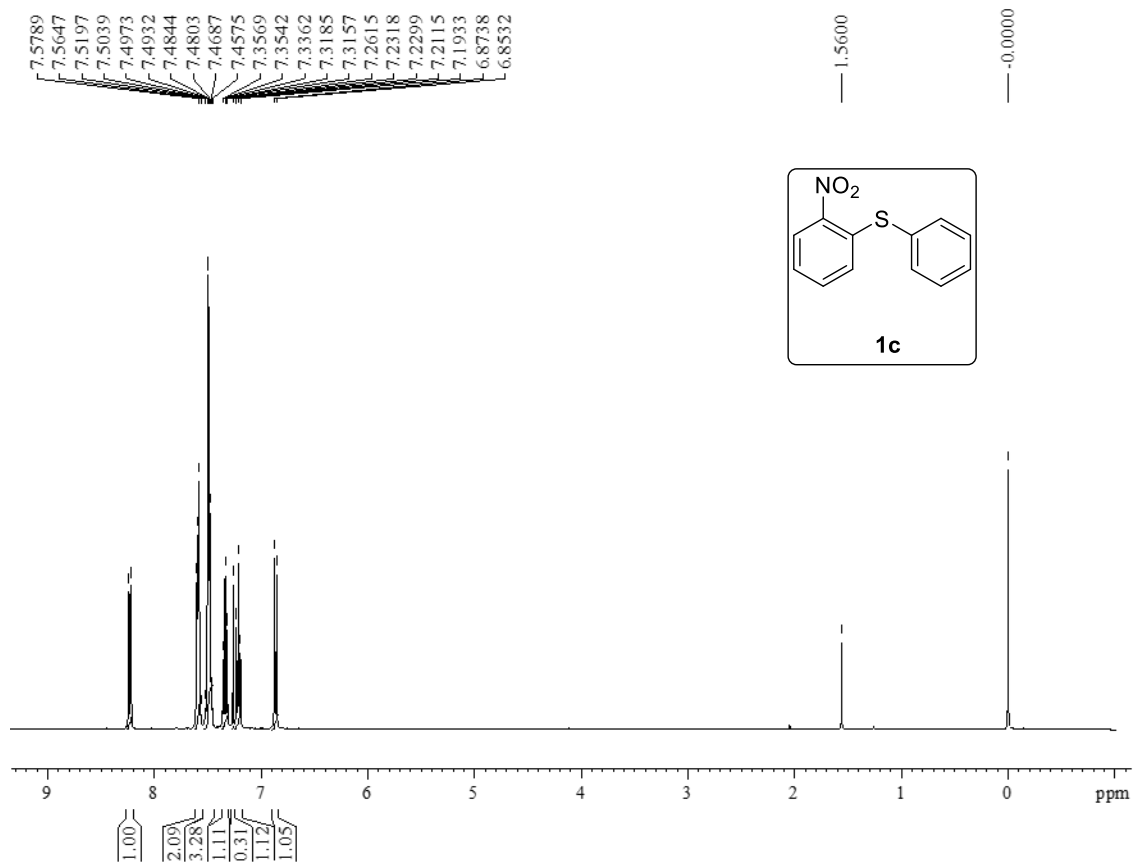

Compound 1c, <sup>1</sup>H-NMR, 400MHz, CDCl<sub>3</sub>

Compound 7 C13 CDCl3

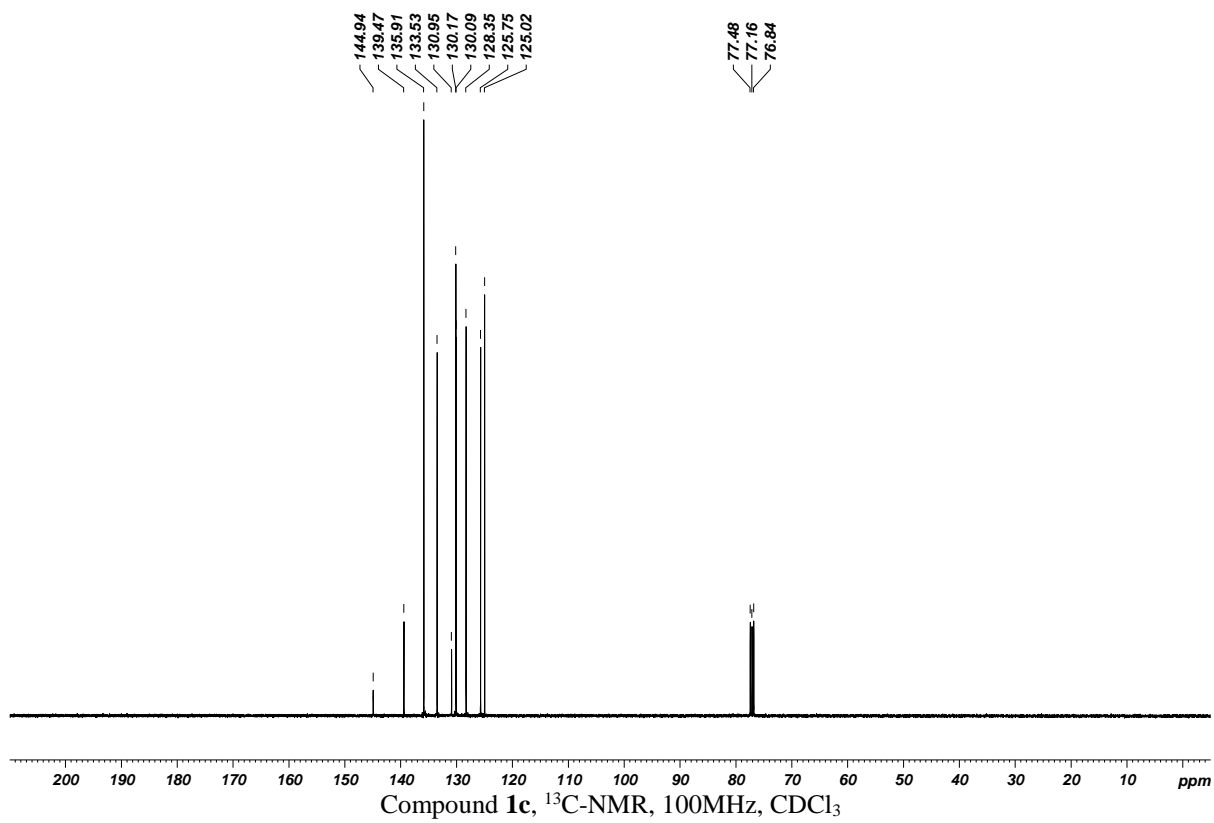

Compound 1c, <sup>13</sup>C-NMR, 100MHz, CDCl<sub>3</sub>

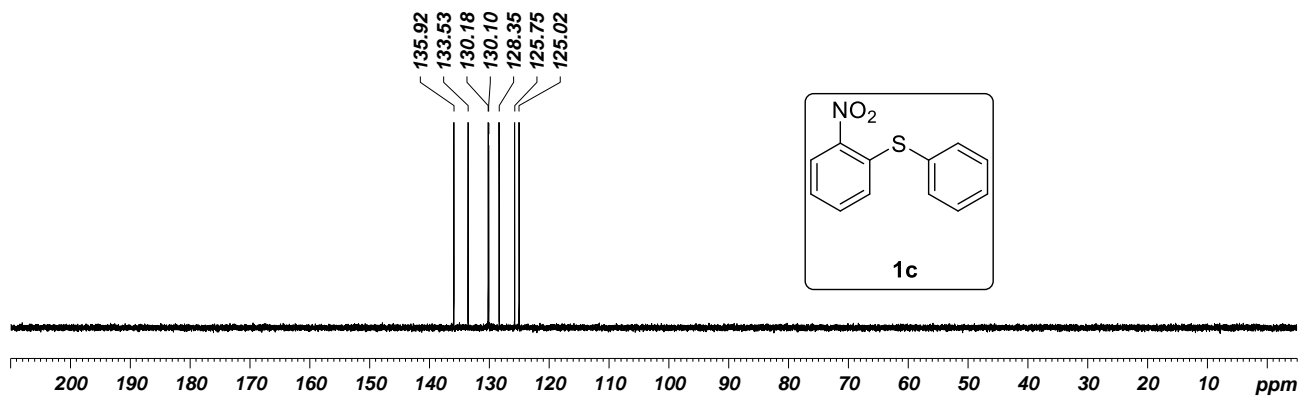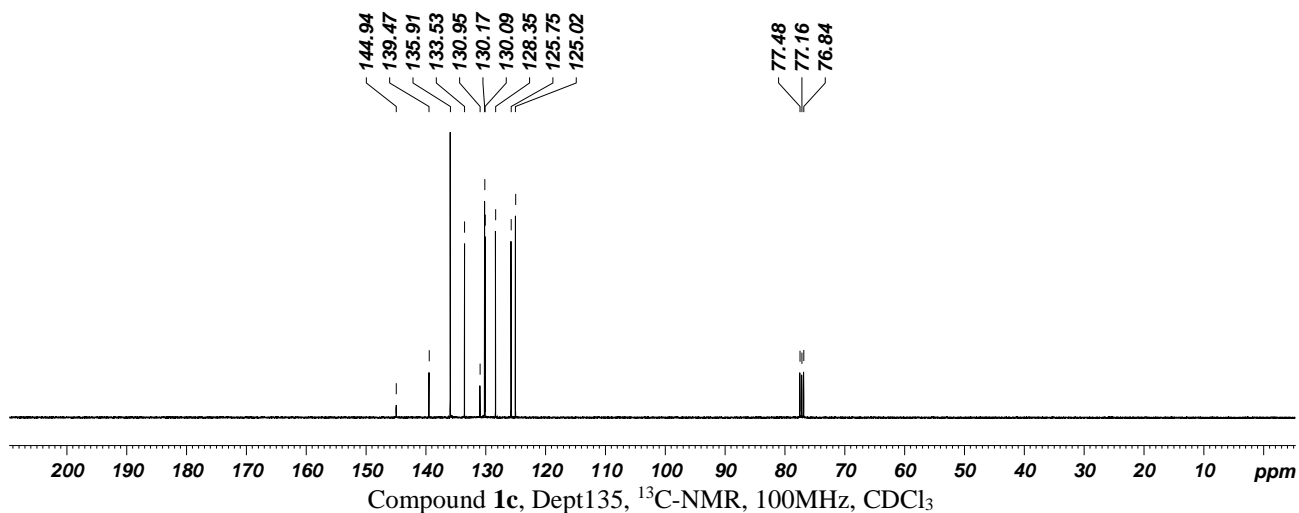

Compound 8 H CDCl<sub>3</sub>

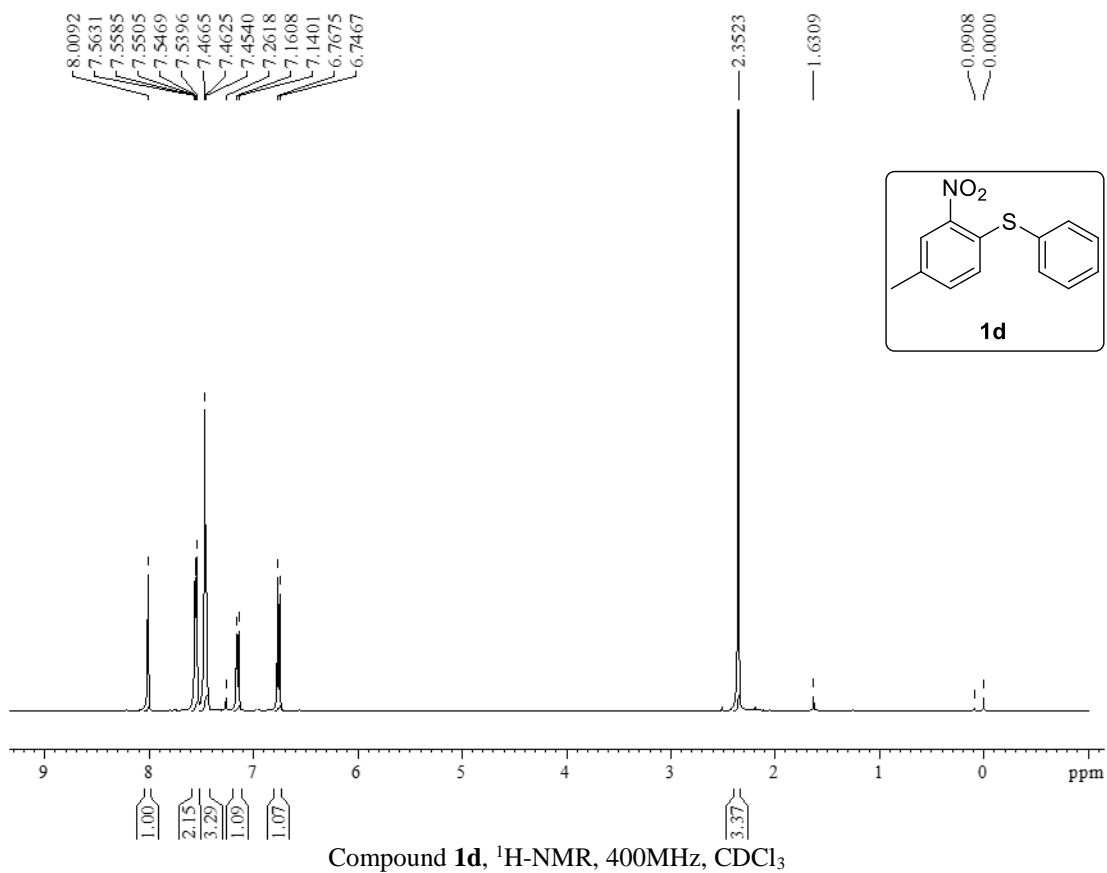

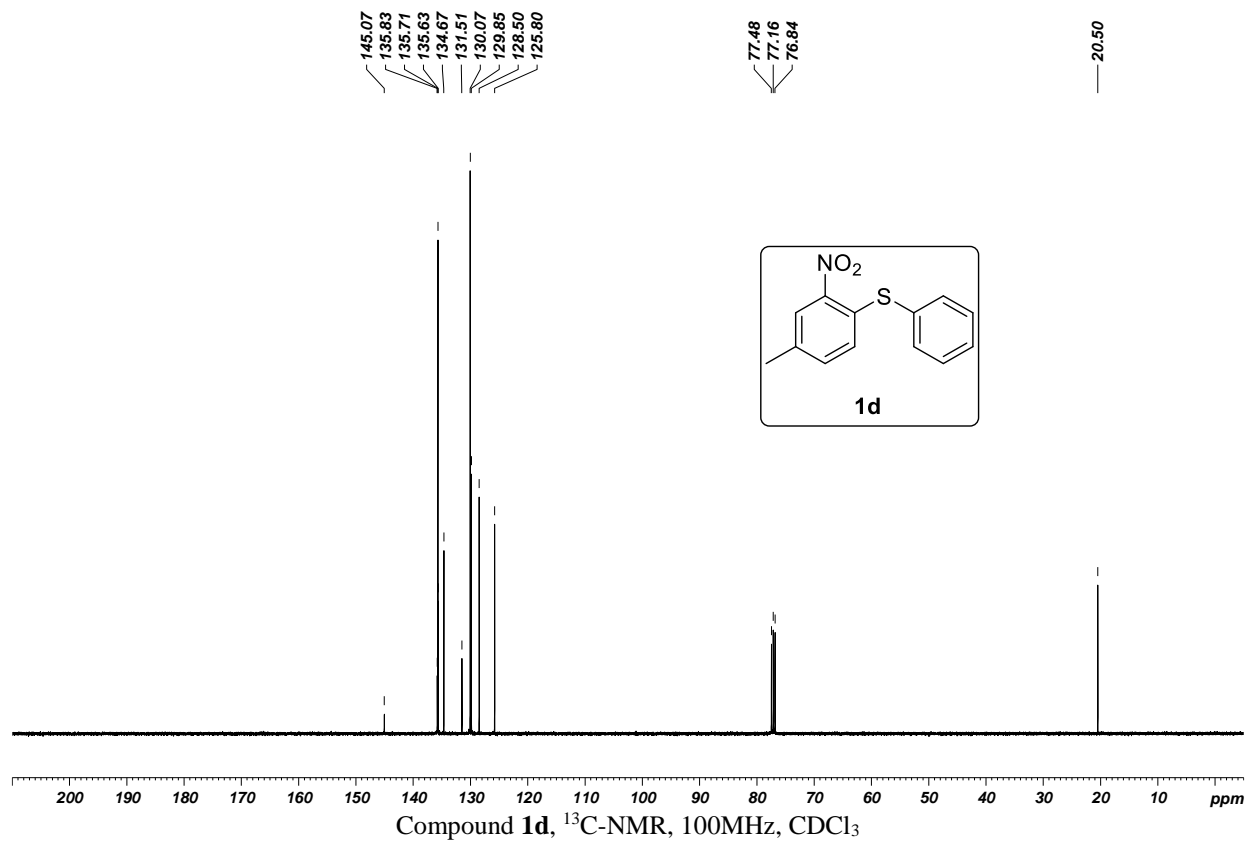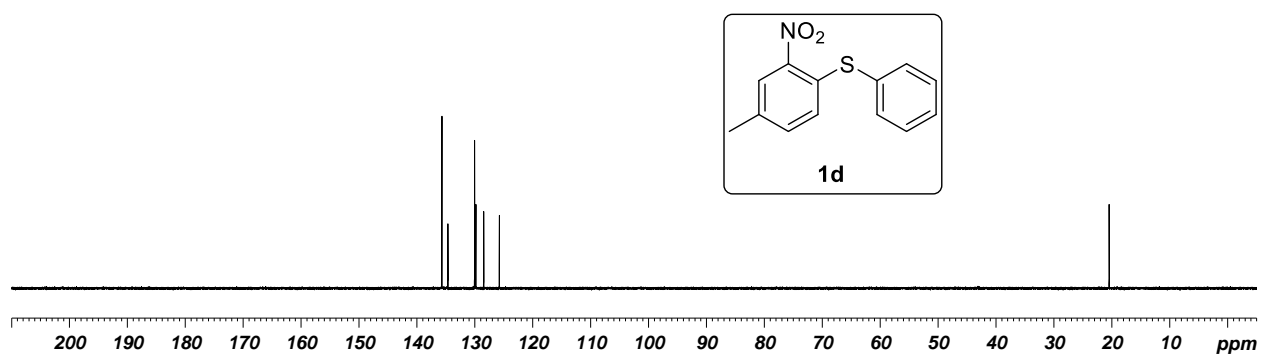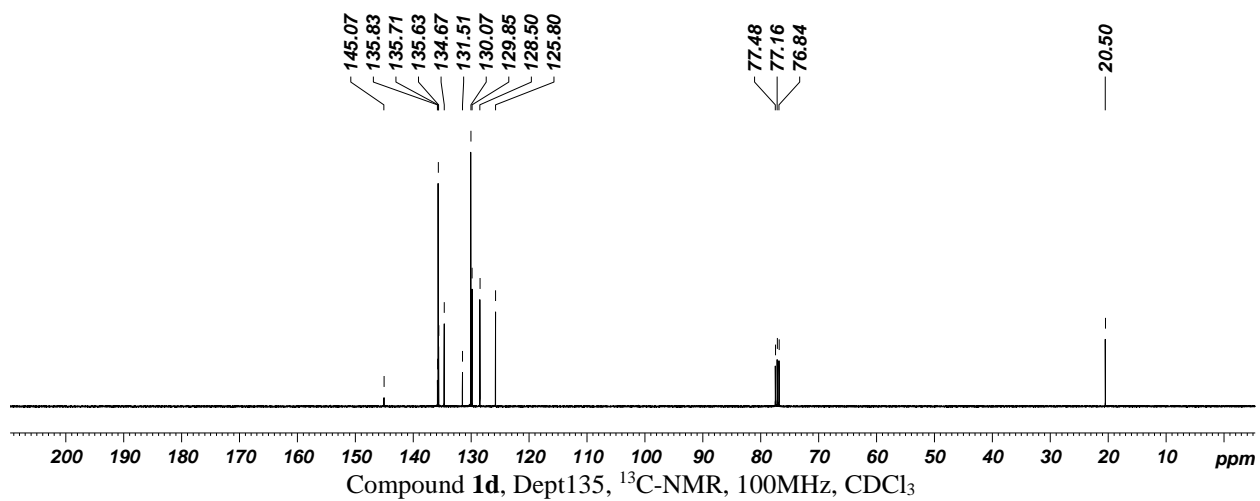

Compound 9 H CDCl3

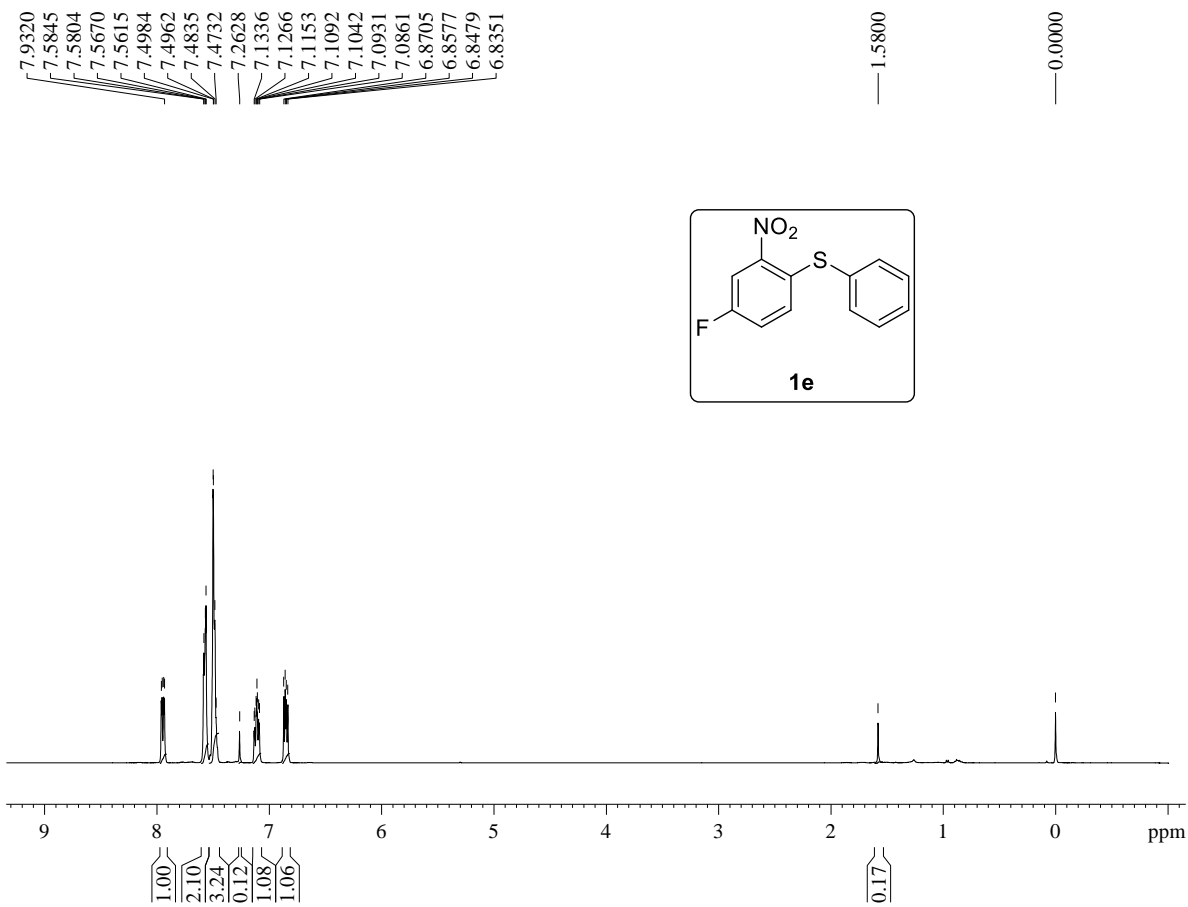

Compound 9 C13 CDCl3

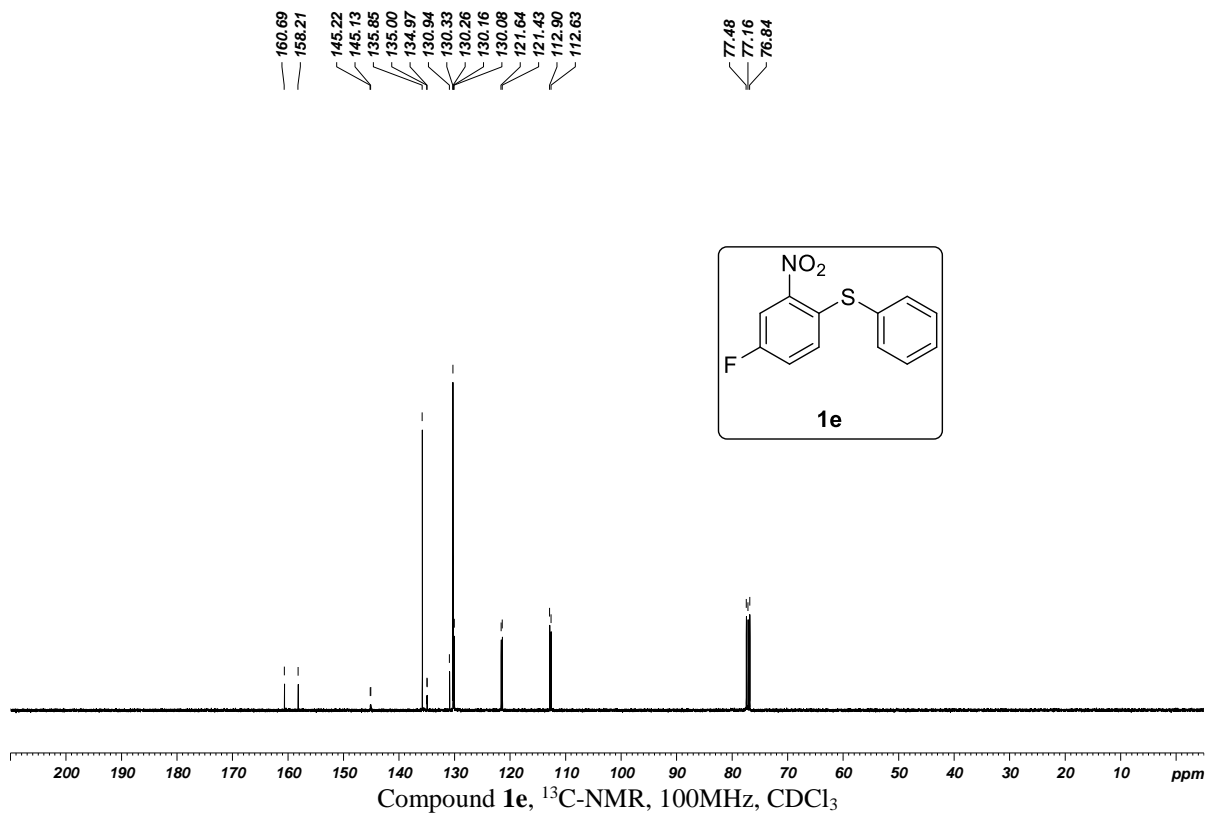

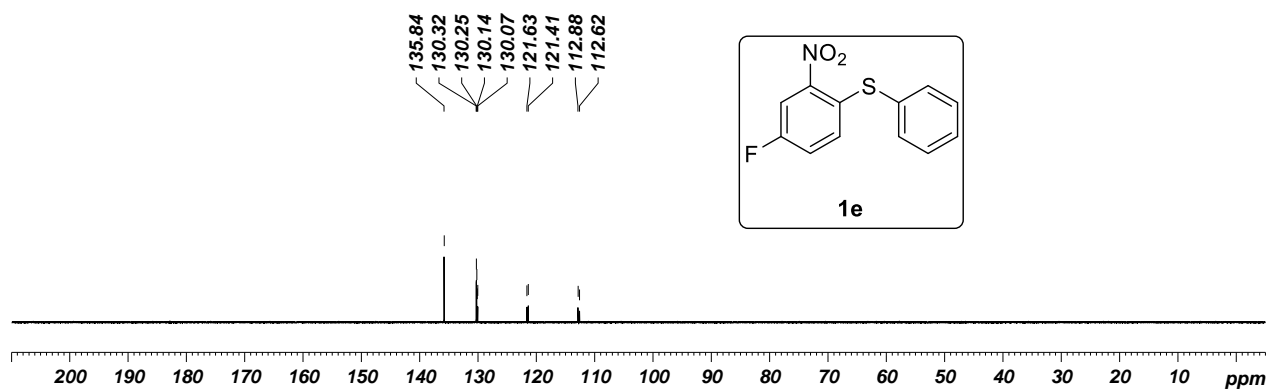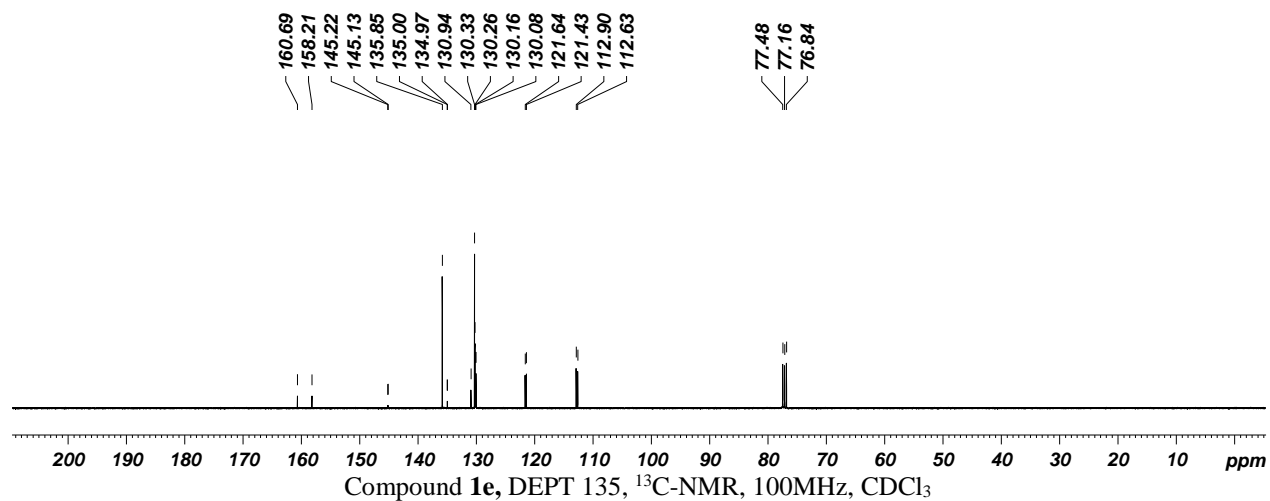

Compound 10 H CDC13

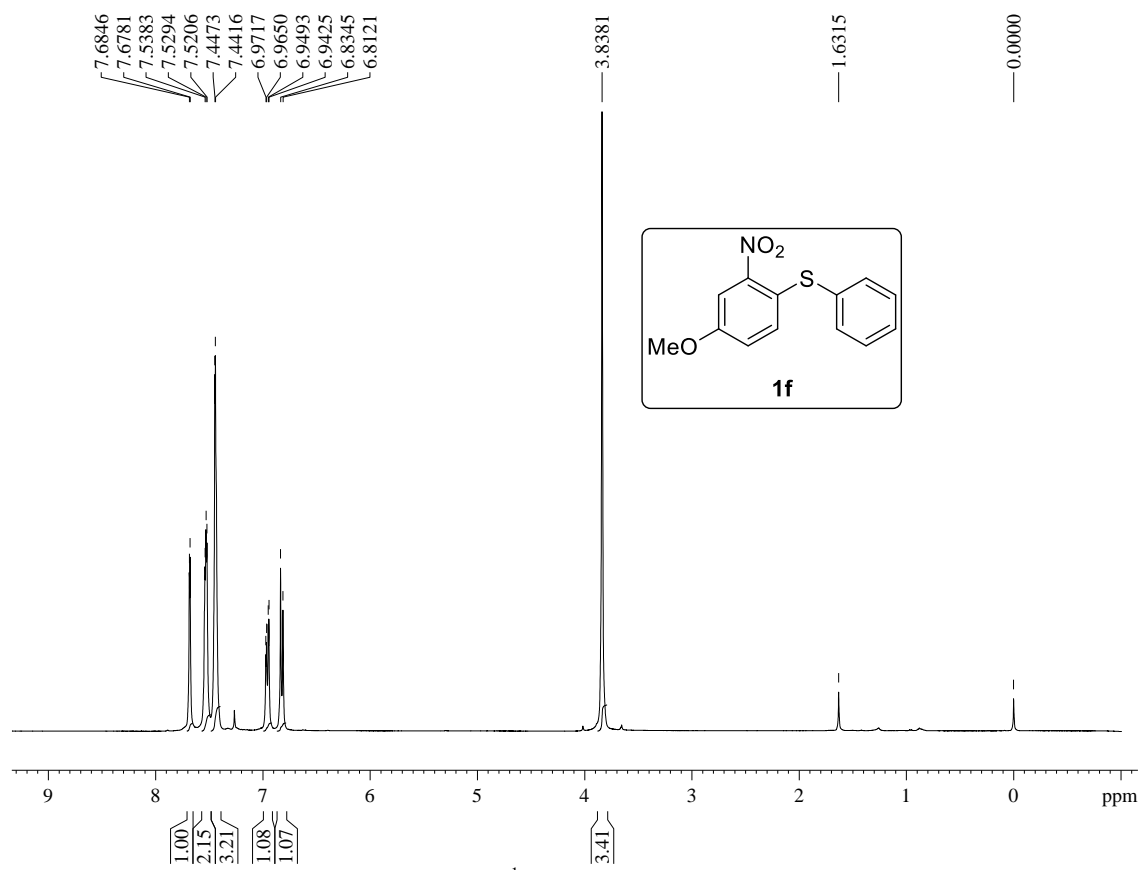

Compound **1f**, <sup>1</sup>H-NMR, 400MHz, CDCl<sub>3</sub>

Compound 10 C13 CDC13

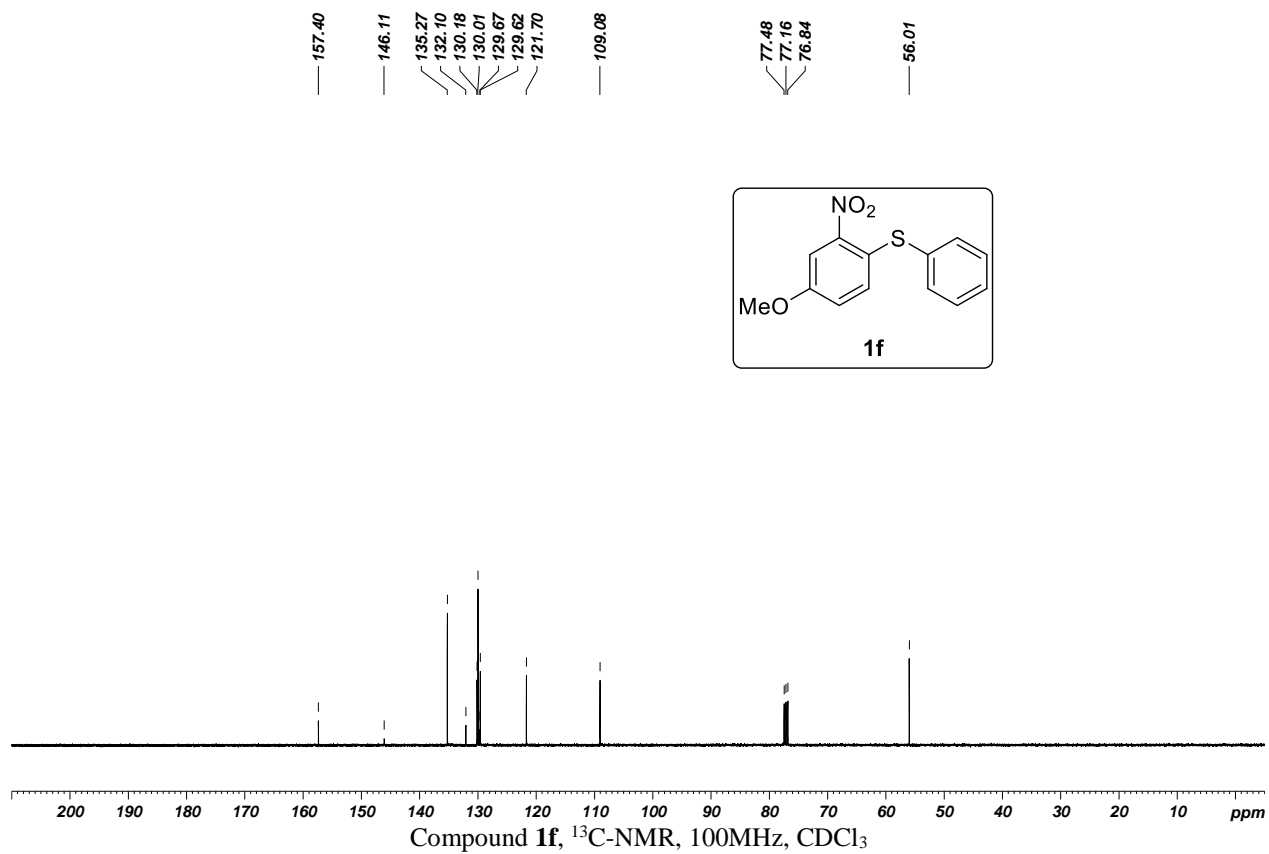

Compound **1f**, <sup>13</sup>C-NMR, 100MHz, CDCl<sub>3</sub>

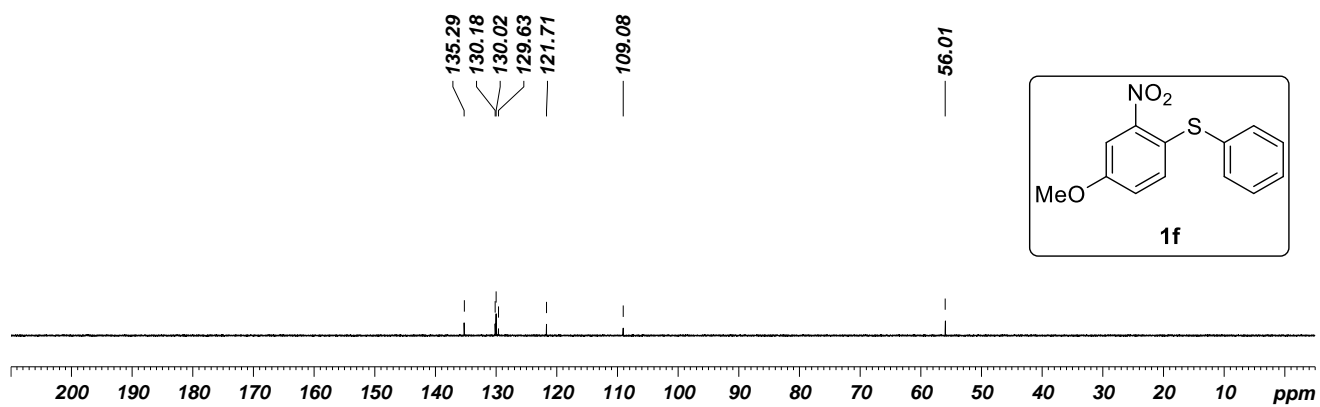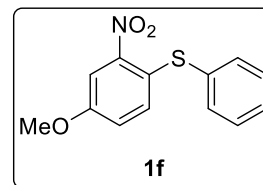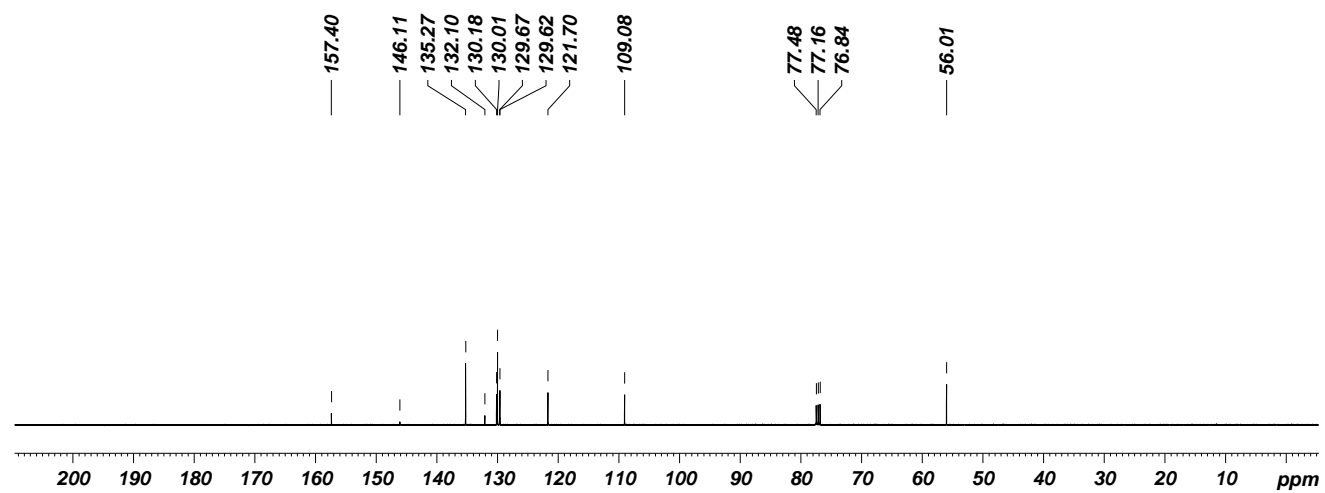

Compound 1f, Dept135, <sup>13</sup>C-NMR, 100MHz, CDCl<sub>3</sub>

Compound 11 H CDC13

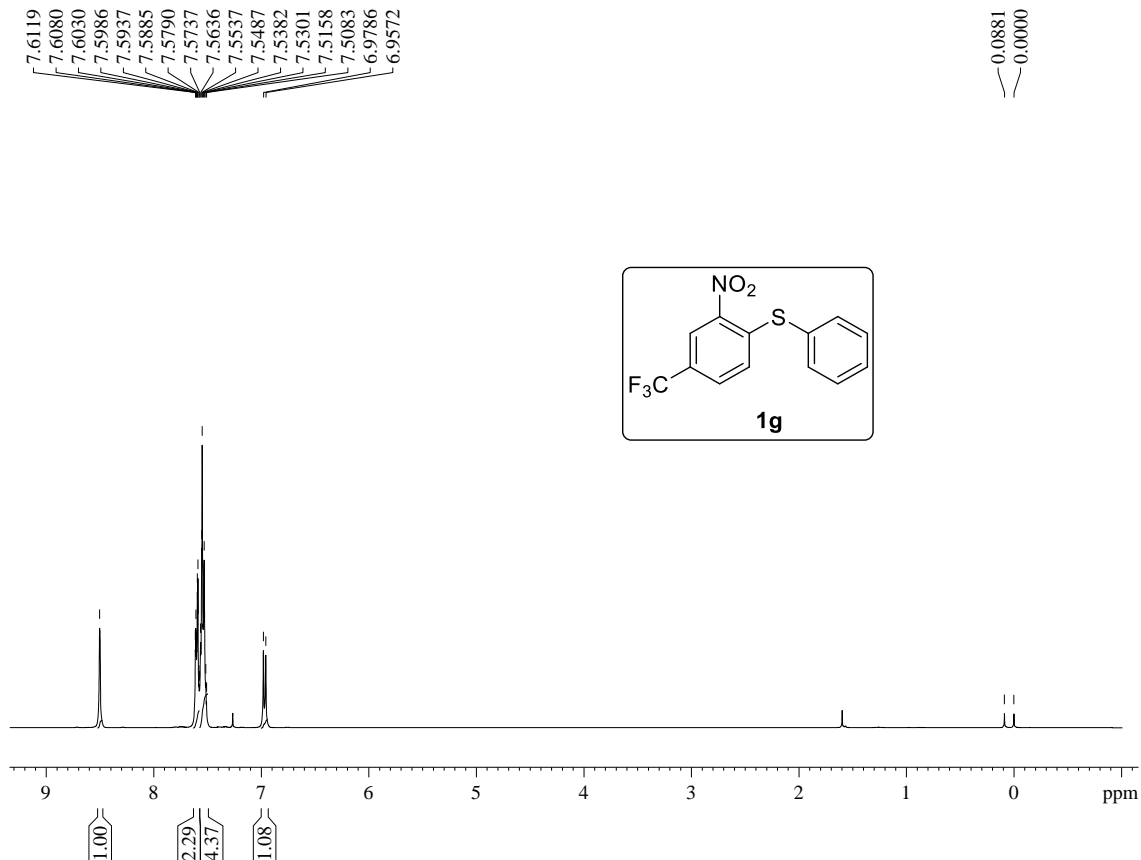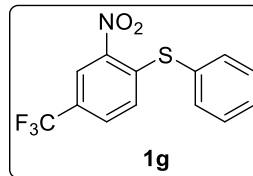

Compound **1g**, <sup>1</sup>H-NMR, 400MHz, CDCl<sub>3</sub>

Compound 11 C13 CDC13

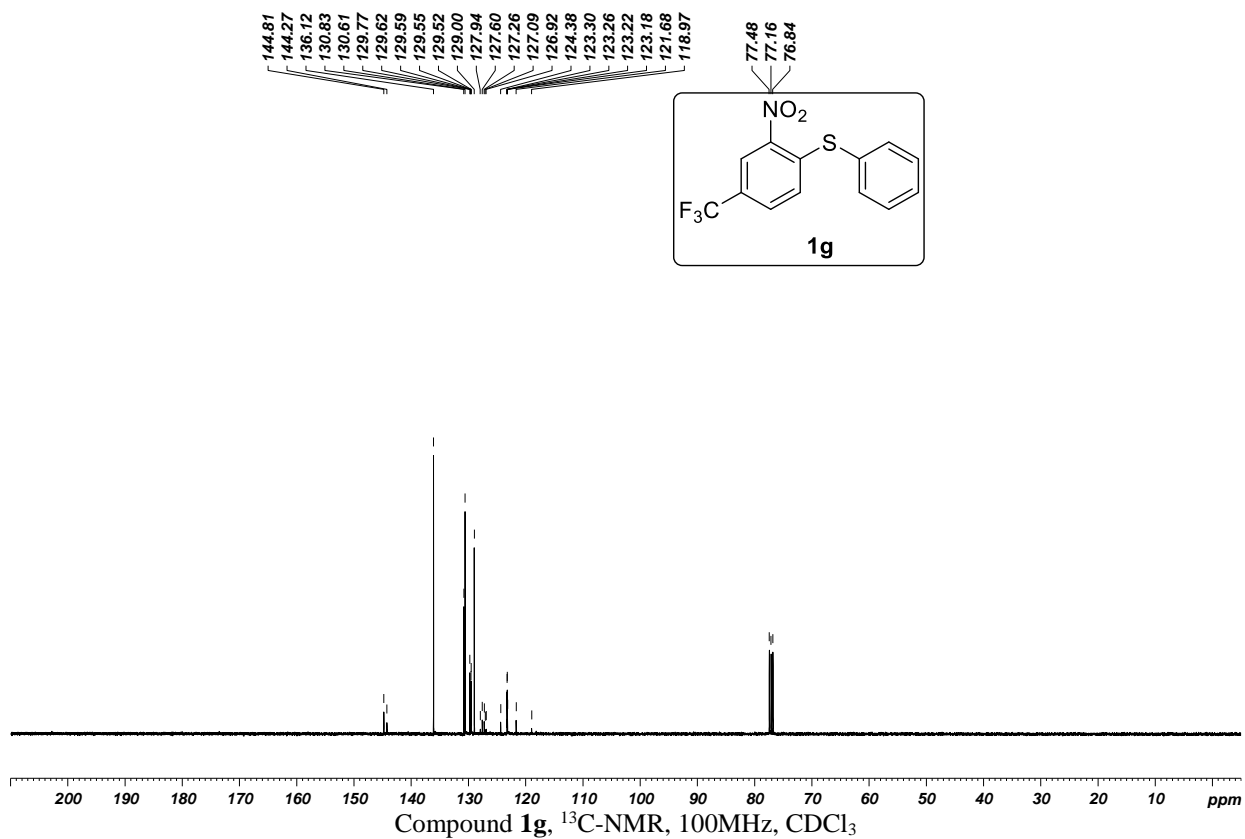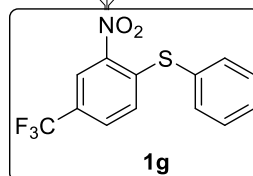

Compound **1g**, <sup>13</sup>C-NMR, 100MHz, CDCl<sub>3</sub>



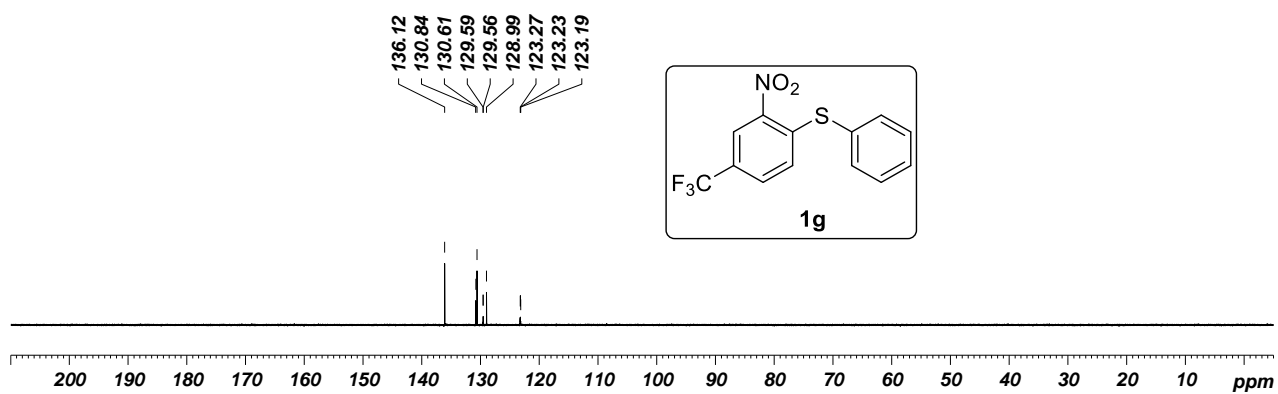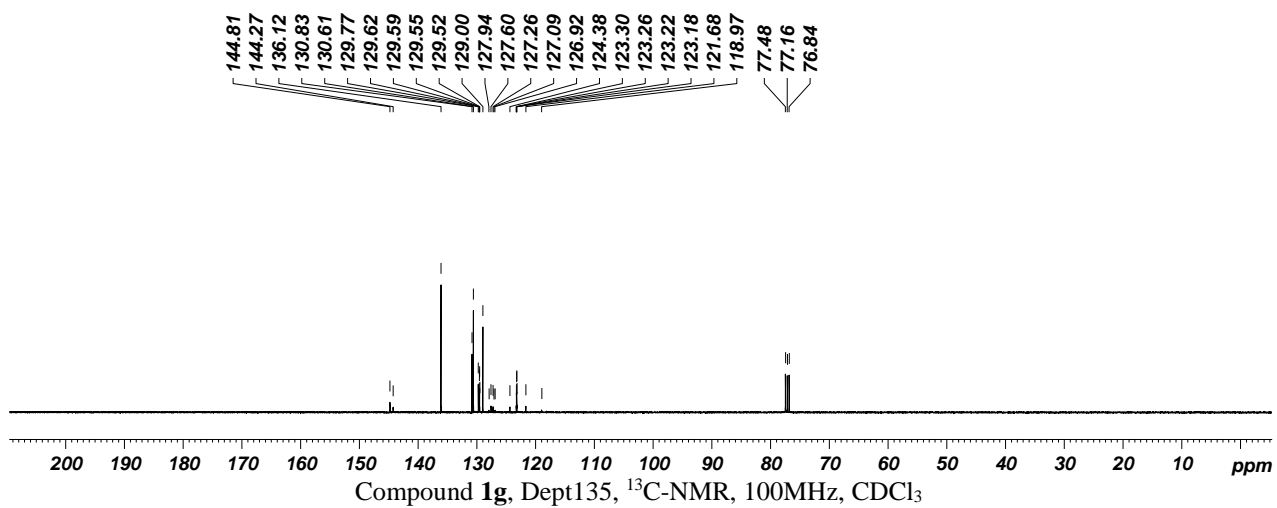

Compound 12 H CDCL3

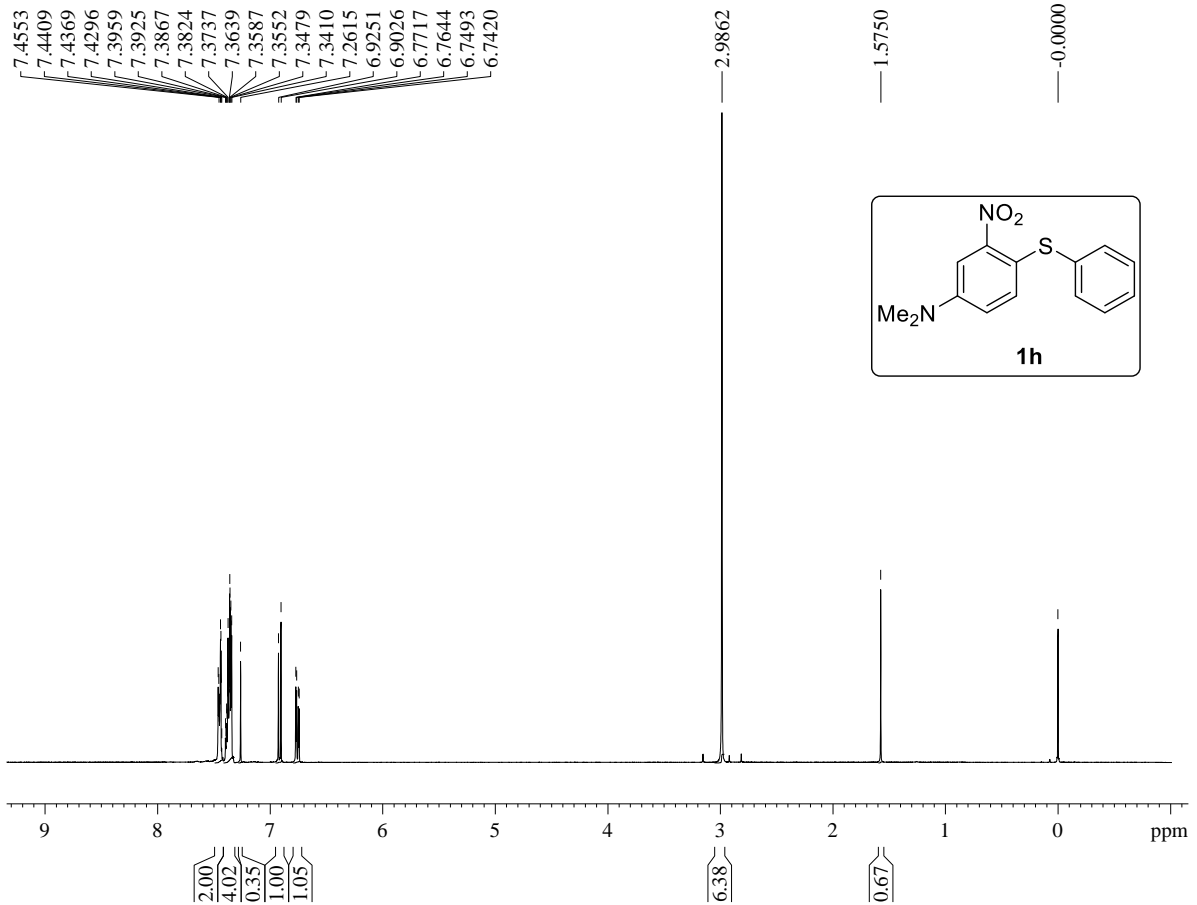

Compound **1h**, <sup>1</sup>H-NMR, 400MHz, CDCl<sub>3</sub>

Compound 12 C13 CDCl3

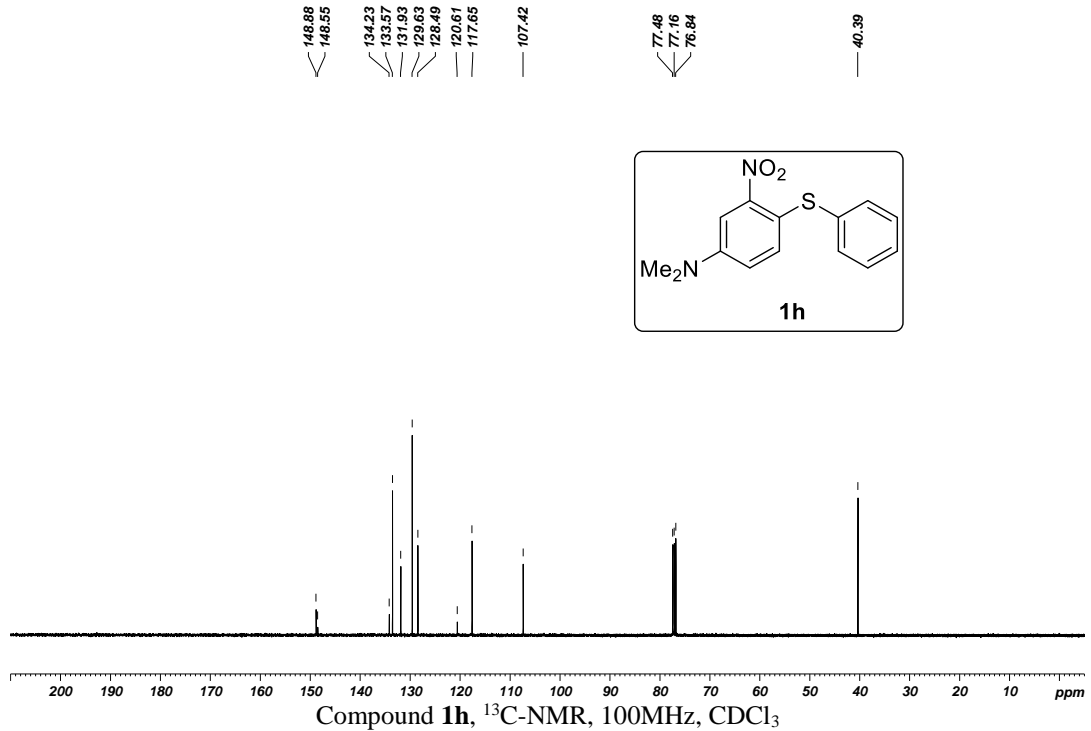

Compound **1h**, <sup>13</sup>C-NMR, 100MHz, CDCl<sub>3</sub>

Compound 12 DEPT135 CDCl<sub>3</sub>

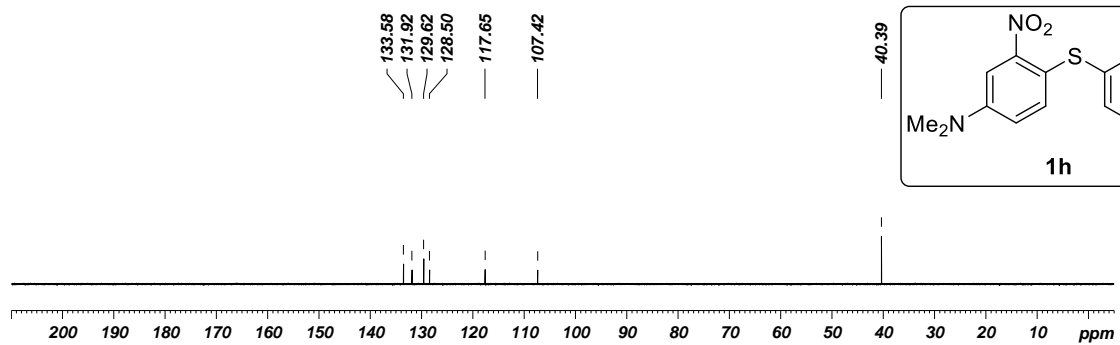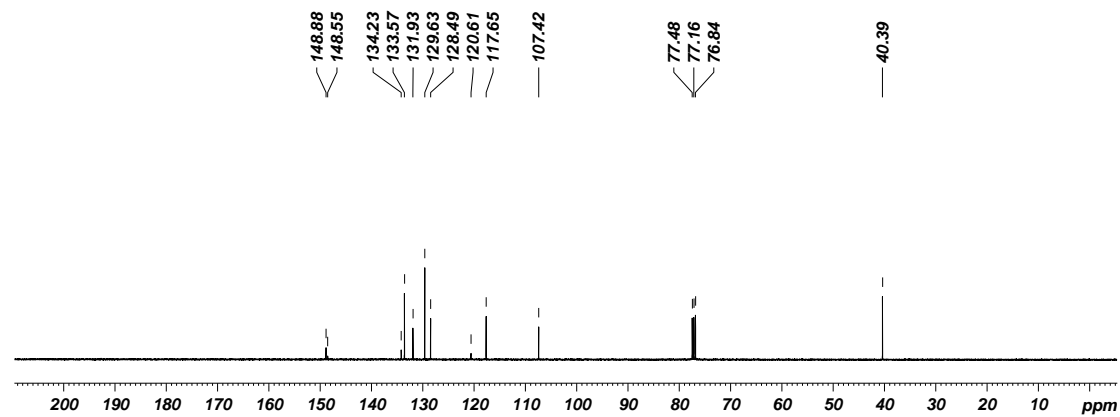

Compound 1h, Dept135, <sup>13</sup>C-NMR, 100MHz, CDCl<sub>3</sub>

Compound 13 H CDCl3

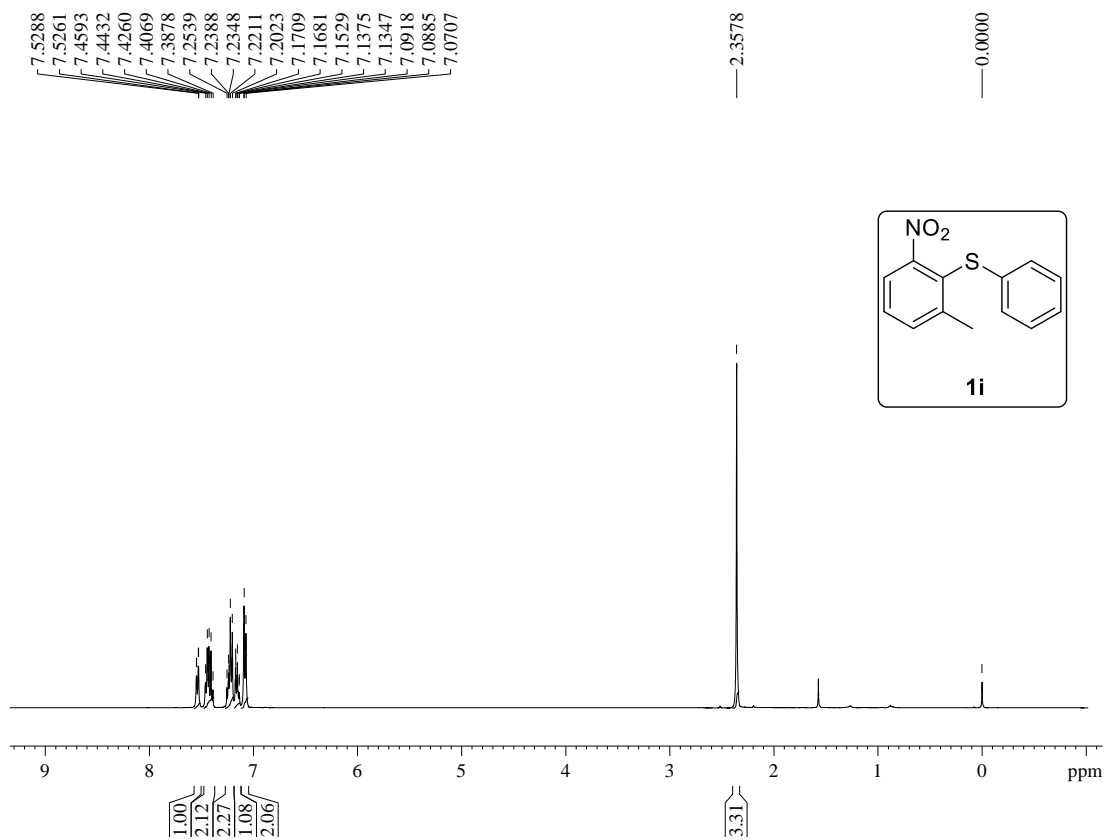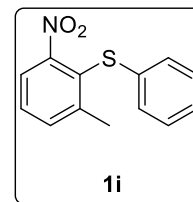

Compound **1i**, <sup>1</sup>H-NMR, 400MHz, CDCl<sub>3</sub>

Compound 13 C13 CDCl3

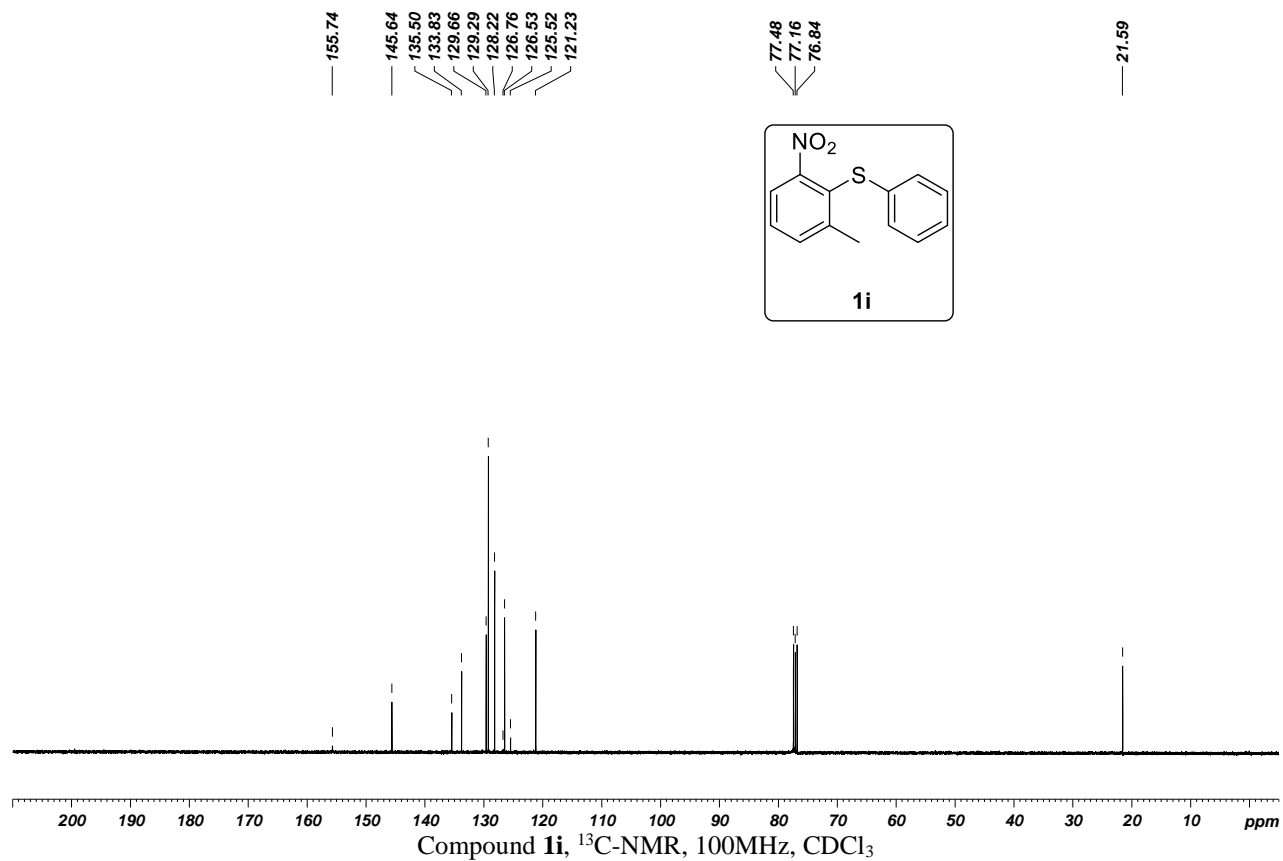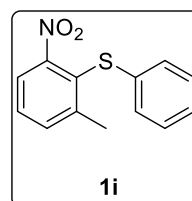

Compound **1i**, <sup>13</sup>C-NMR, 100MHz, CDCl<sub>3</sub>

Compound 13 DEPT135 CDCl<sub>3</sub>

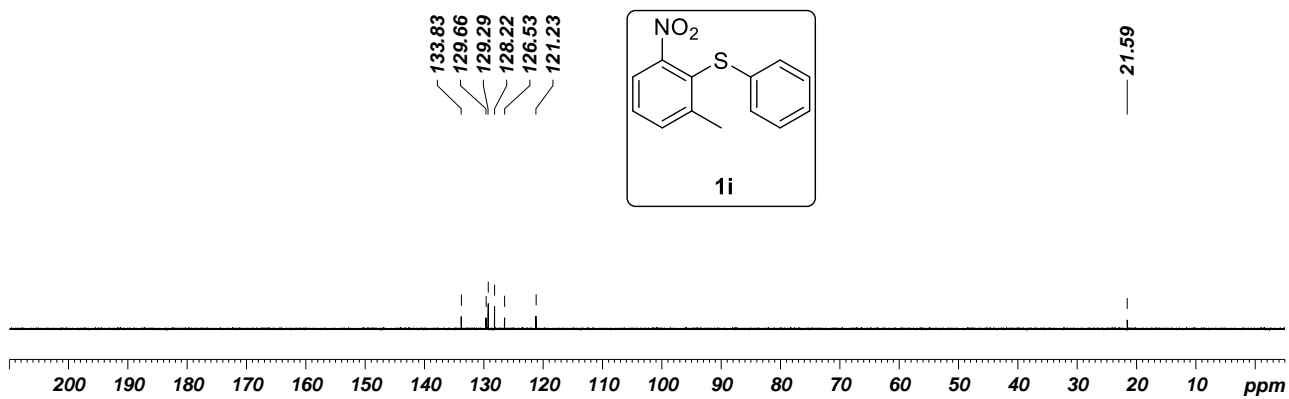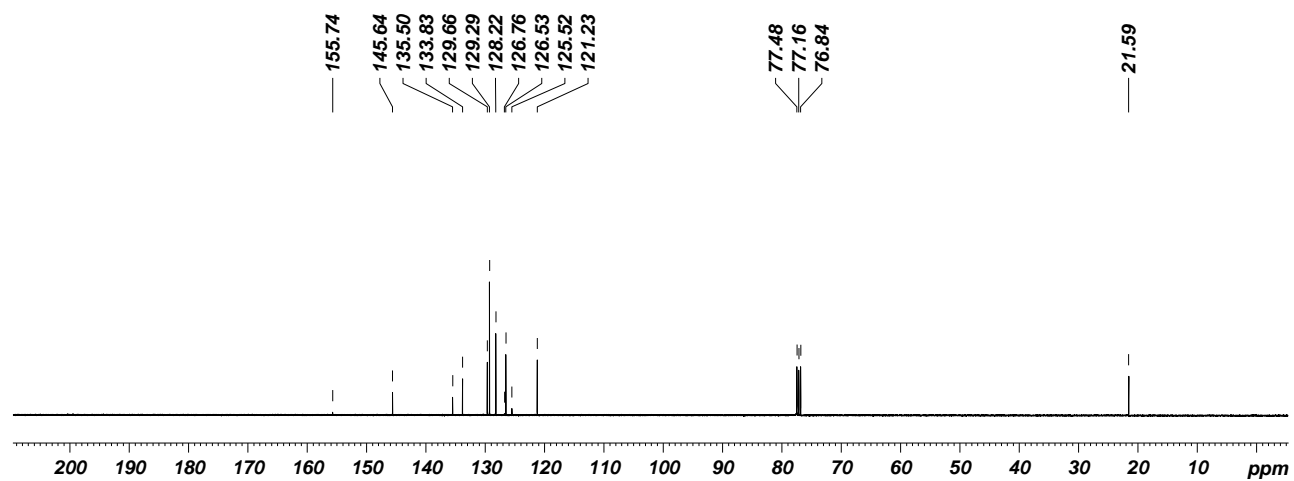

Compound **1i**, DEPT135, <sup>13</sup>C-NMR, 100MHz, CDCl<sub>3</sub>

Compound 14 H CDC13

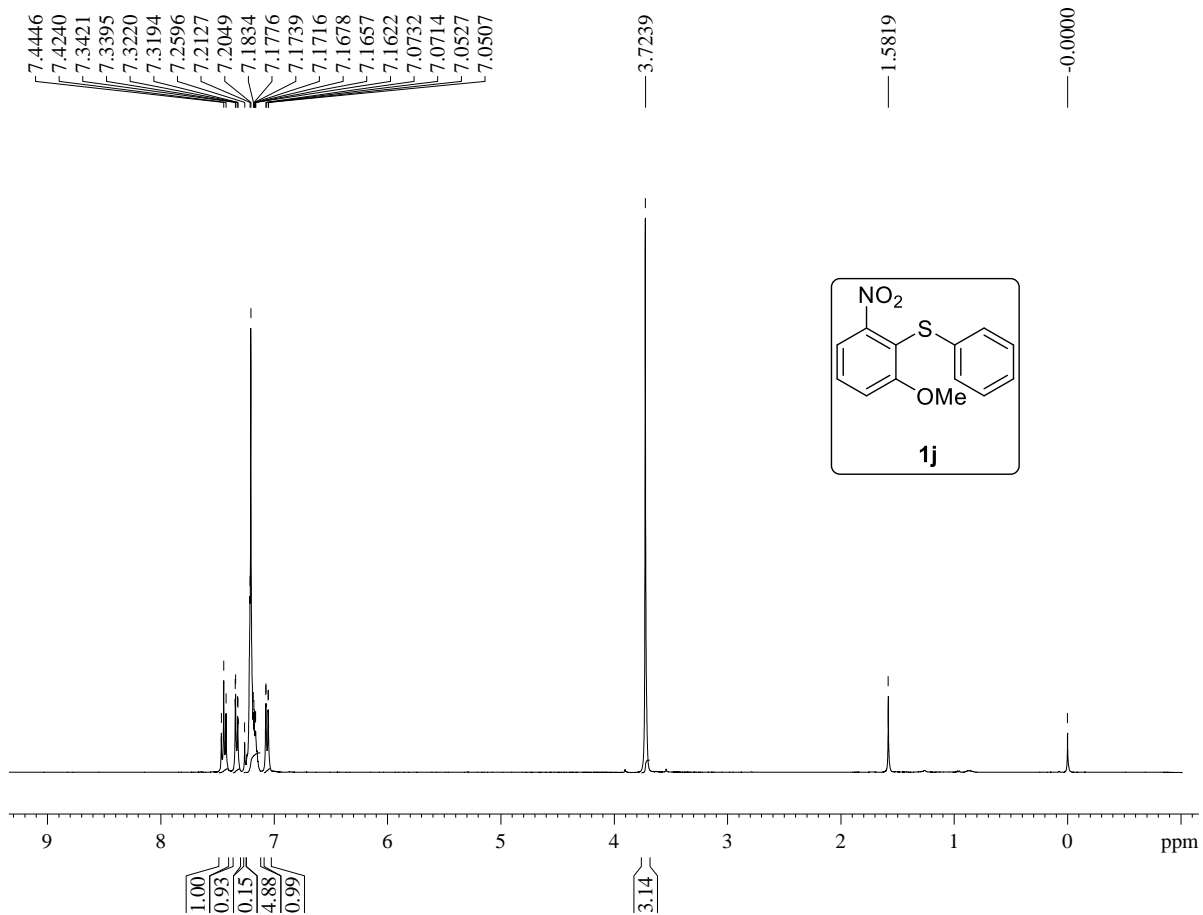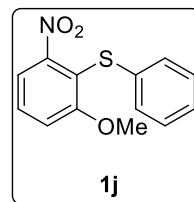

Compound **1j**, Dept135, <sup>1</sup>H-NMR, 400MHz, CDCl<sub>3</sub>

Compound 14 C13 CDC13

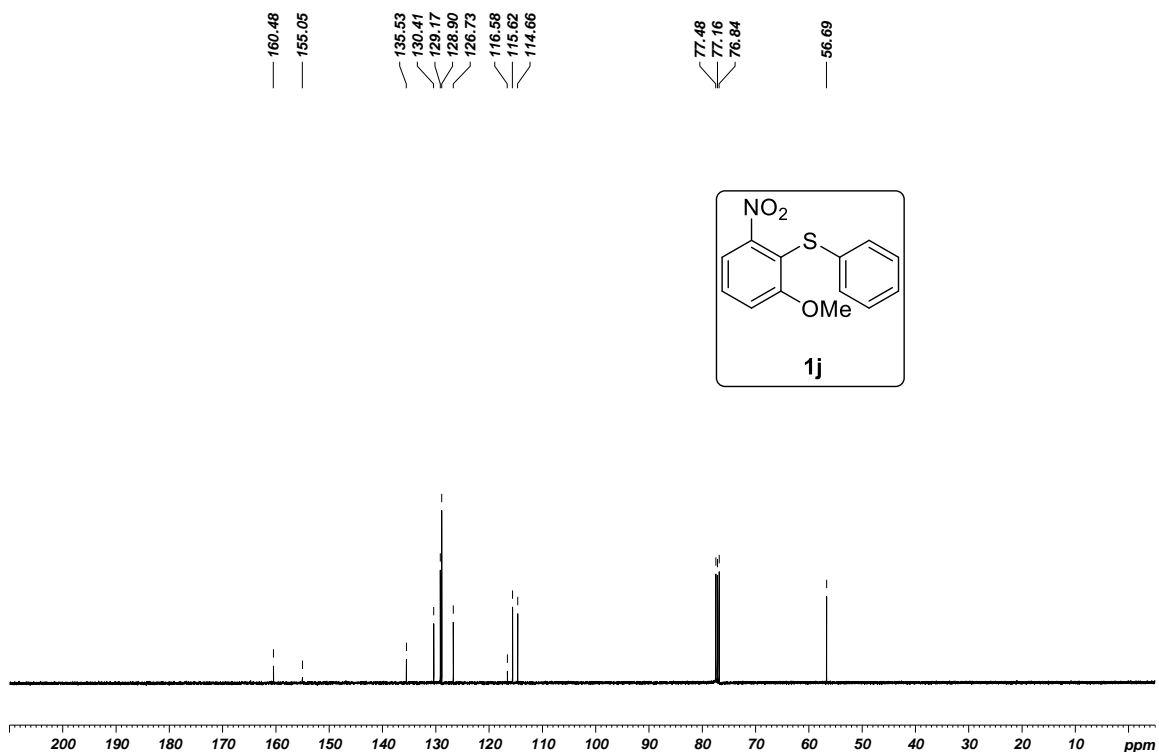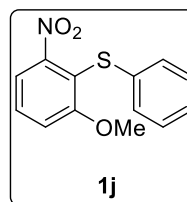

Compound **1j**, <sup>13</sup>C-NMR, 100MHz, CDCl<sub>3</sub>

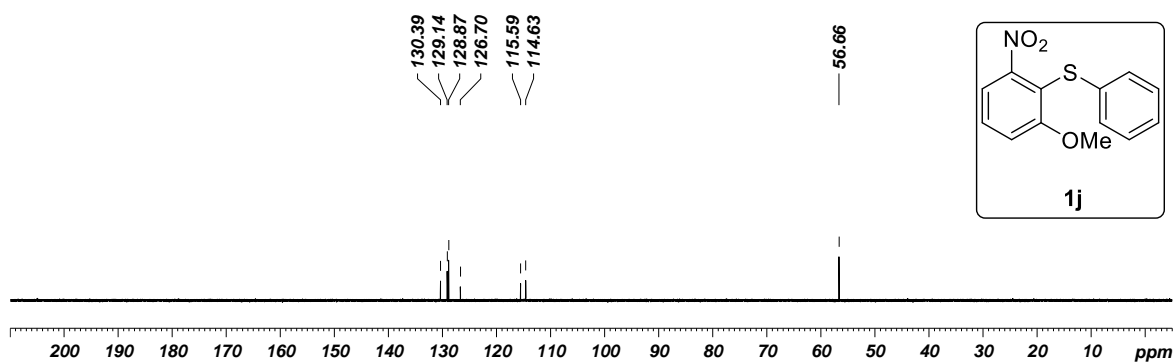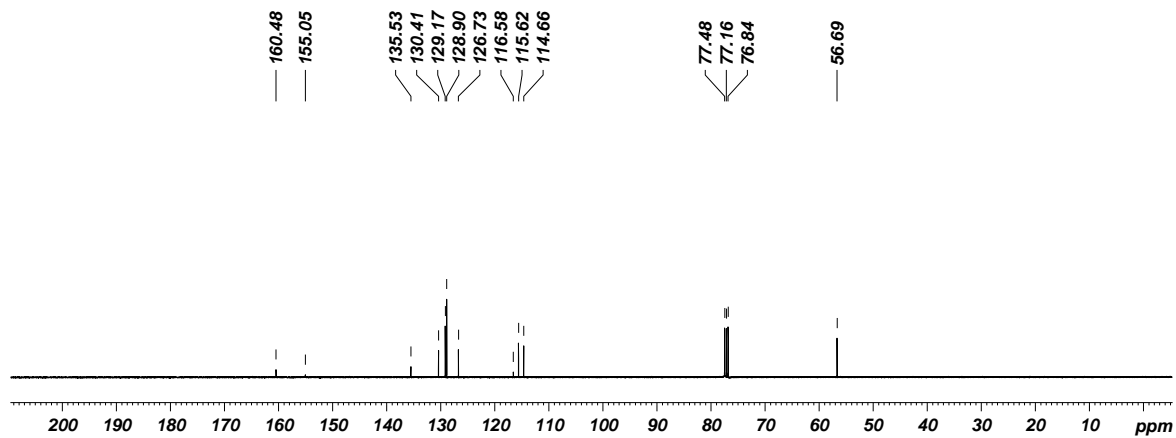Compound 1j, Dept135, <sup>13</sup>C-NMR, 100MHz, CDCl<sub>3</sub>

Compound 15 H CDCl3

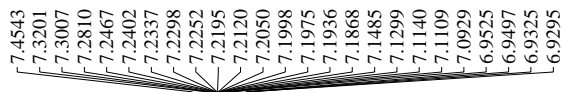

-0.0000

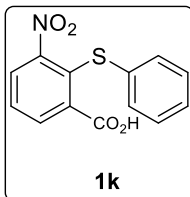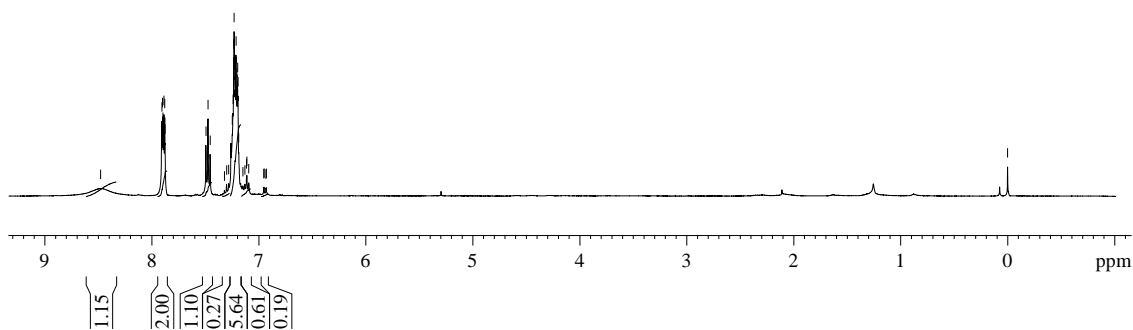

Compound **1k**, <sup>1</sup>H-NMR, 400MHz, CDCl<sub>3</sub>

Compound 15 C13 CDCl3

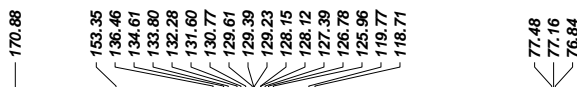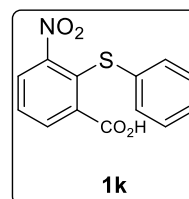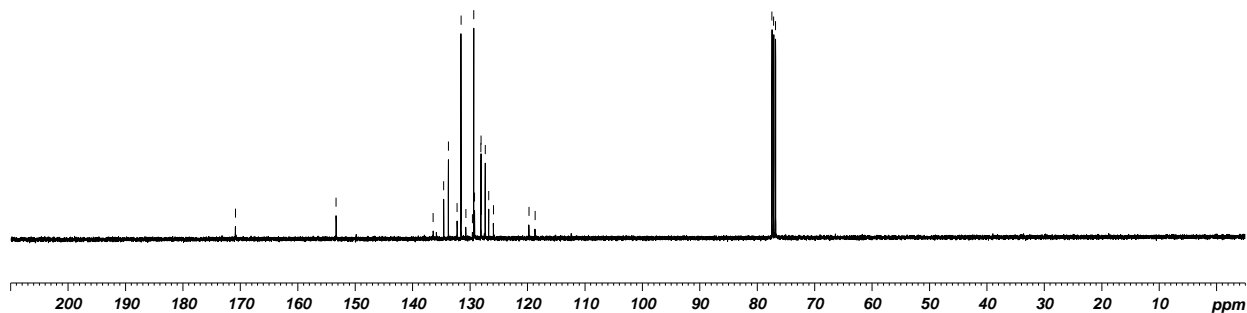

Compound **1k**, <sup>13</sup>C-NMR, 100MHz, CDCl<sub>3</sub>



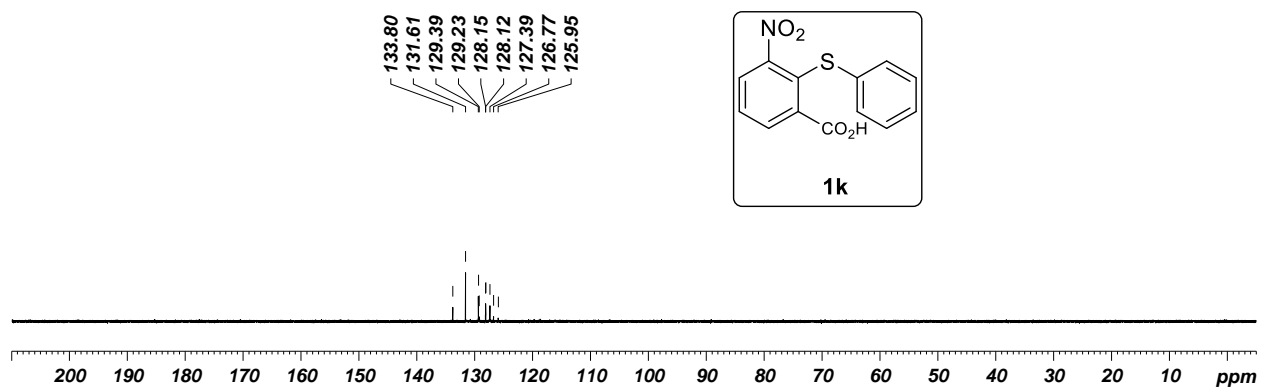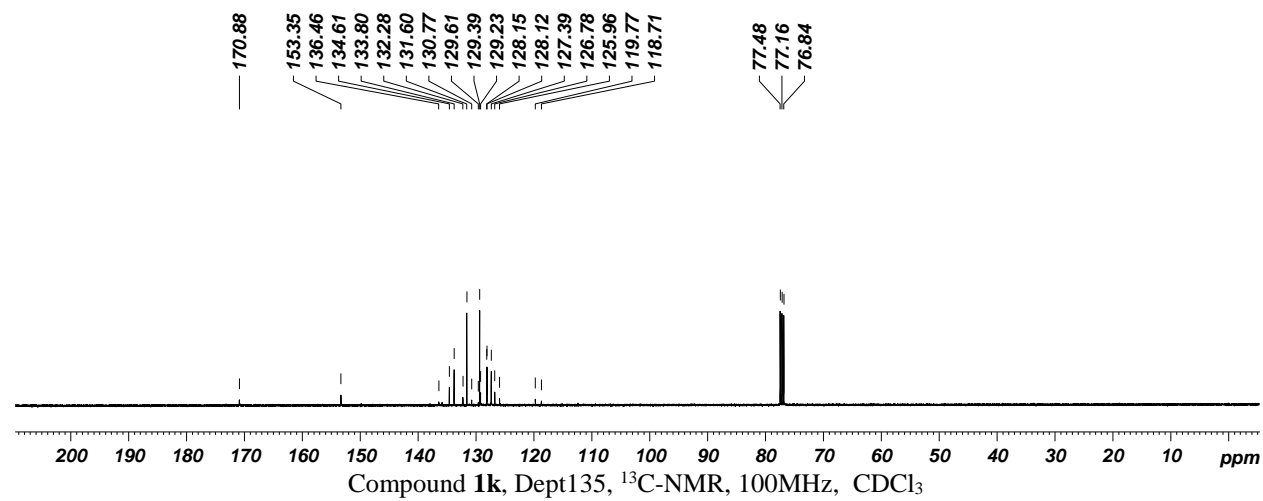

Compound 16 H CDCl3

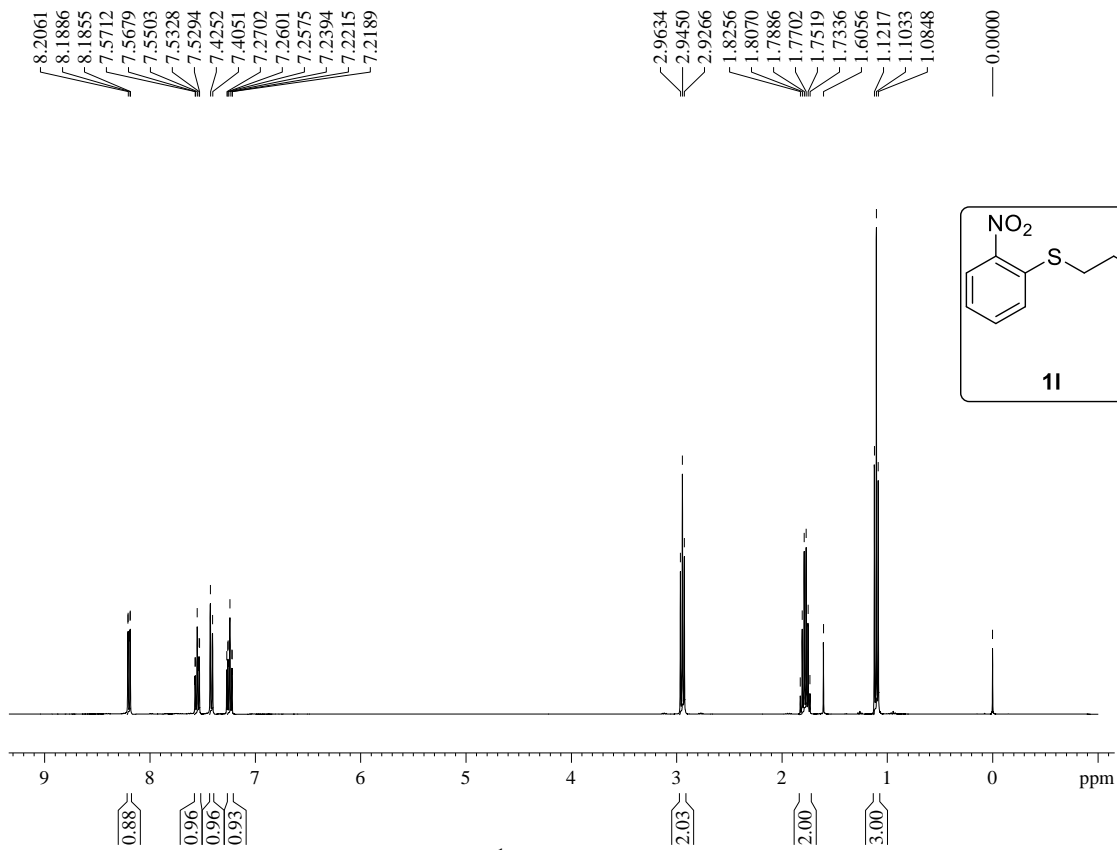

Compound **11**, <sup>1</sup>H-NMR, 400MHz, CDCl<sub>3</sub>

Compound 16 C13 CDCl3

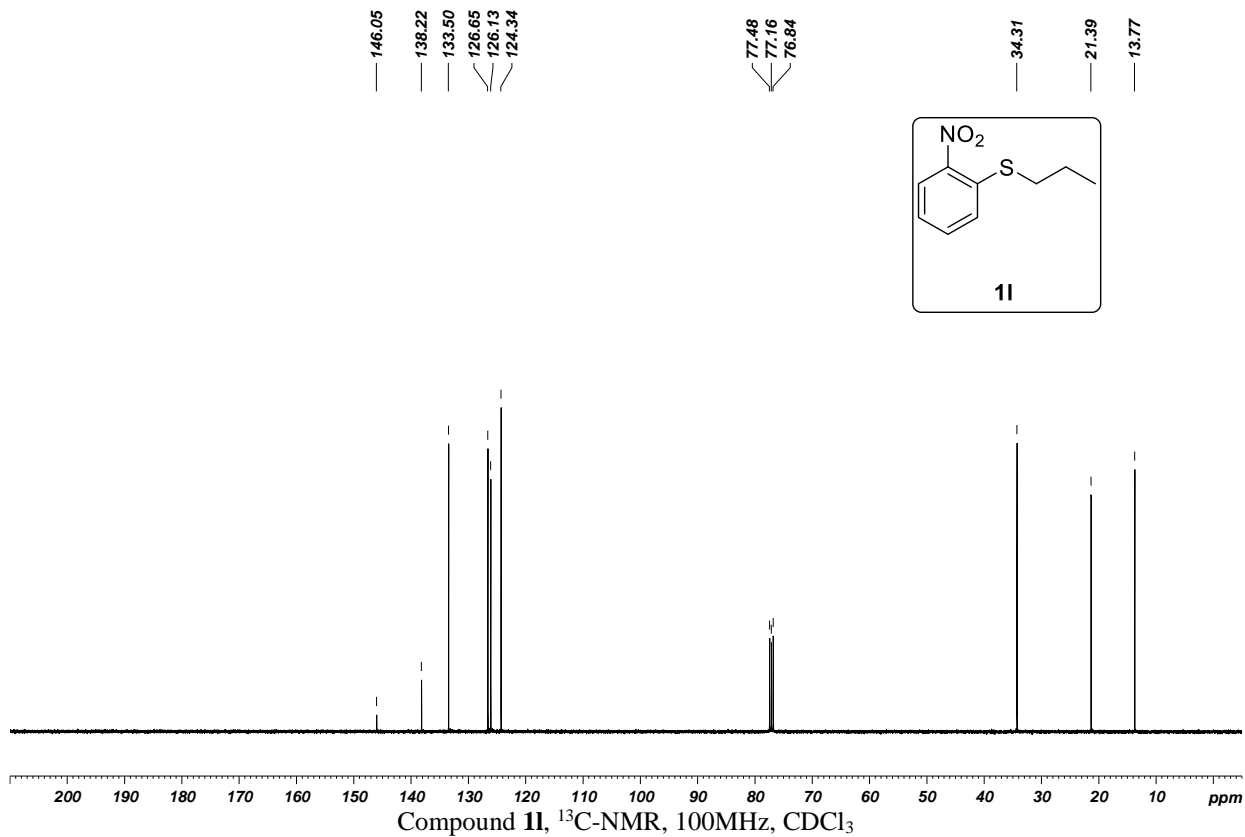

Compound **11**, <sup>13</sup>C-NMR, 100MHz, CDCl<sub>3</sub>

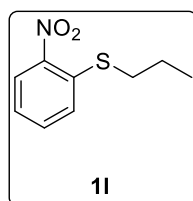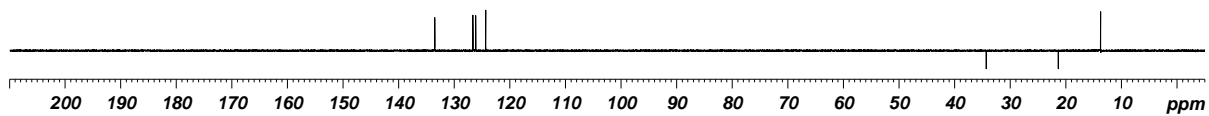

146.05  
138.22  
133.50  
126.65  
126.13  
124.34

77.48  
77.16  
76.84

34.31  
21.39  
13.77

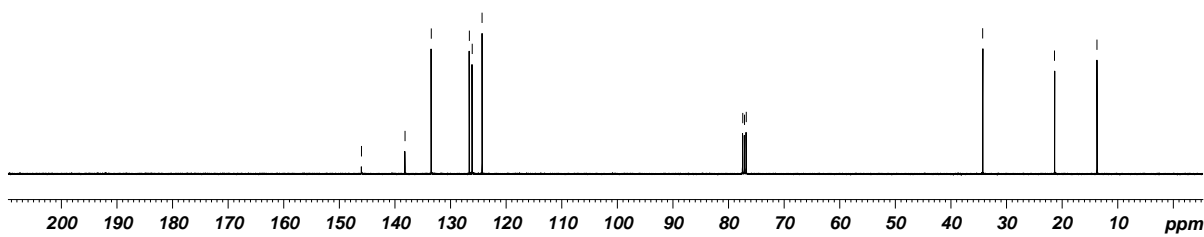Compound **11**, Dept135,  $^{13}\text{C}$ -NMR, 100MHz,  $\text{CDCl}_3$

compound 17

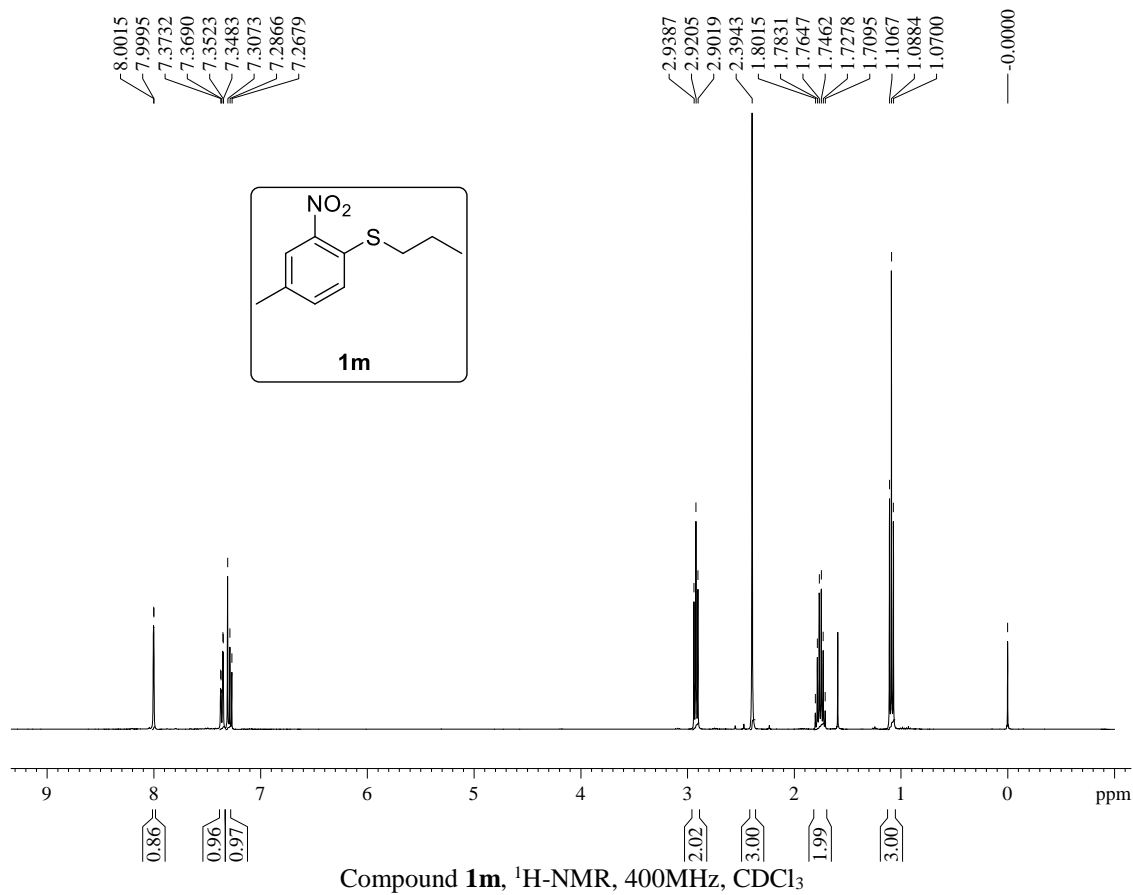

Compound 17 C13  $\text{CDCl}_3$

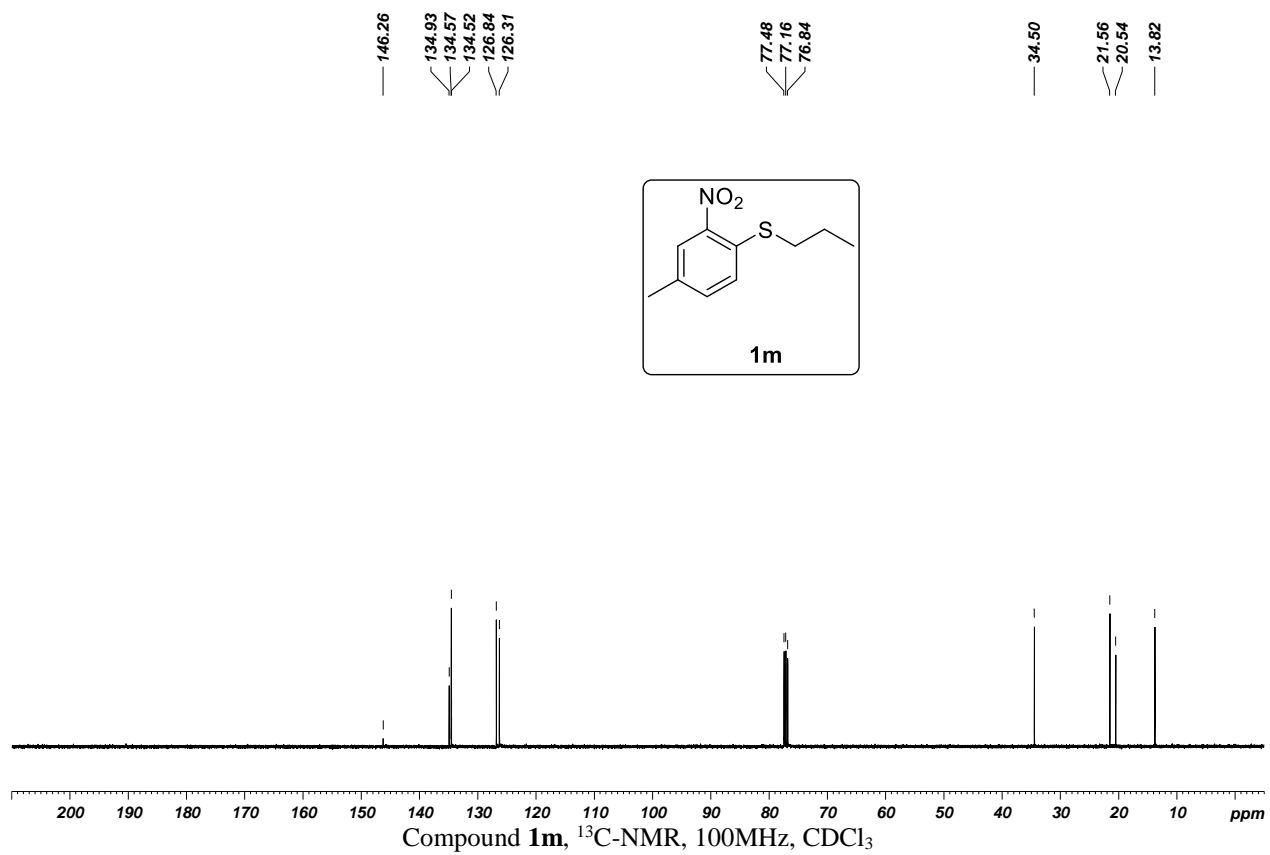

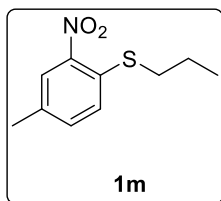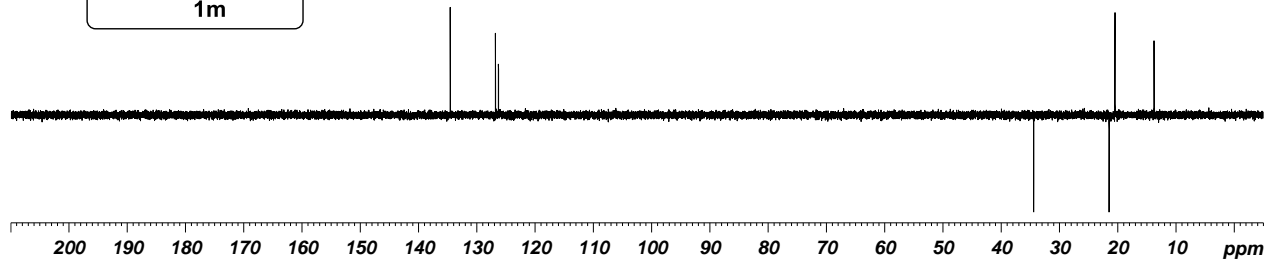

146.26  
134.93  
134.57  
134.52  
126.84  
126.31  
77.48  
77.16  
76.84  
34.50  
21.56  
20.54  
13.82

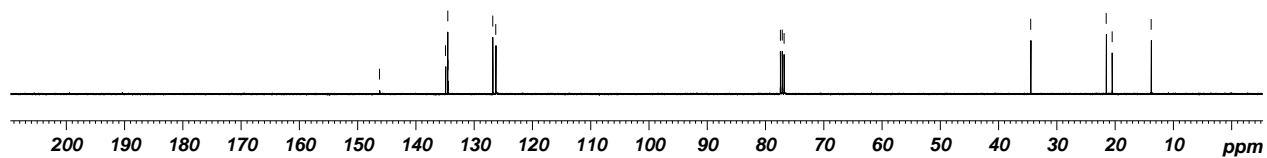Compound **1m**, Dept135, <sup>13</sup>C-NMR, 100MHz, CDCl<sub>3</sub>

Compound 18 H CDCl3

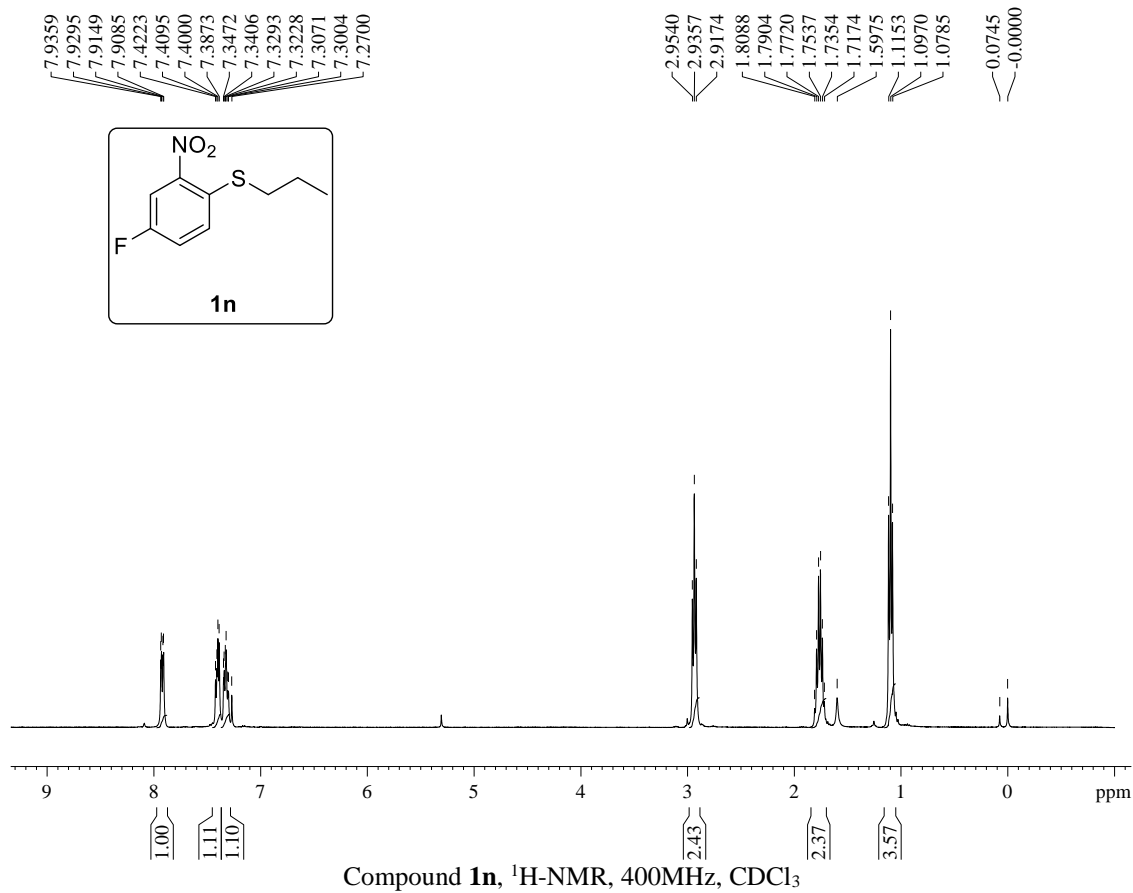

Compound 18 C13 CDCL3

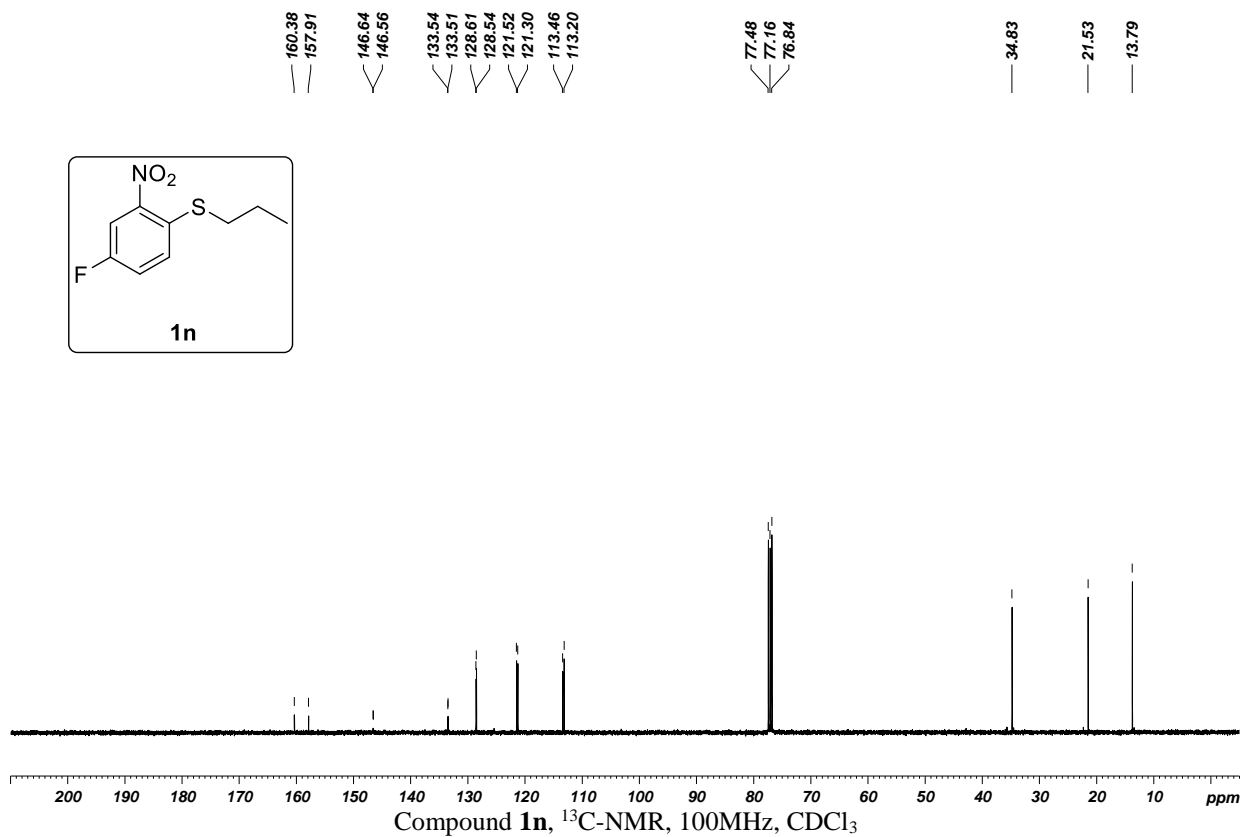

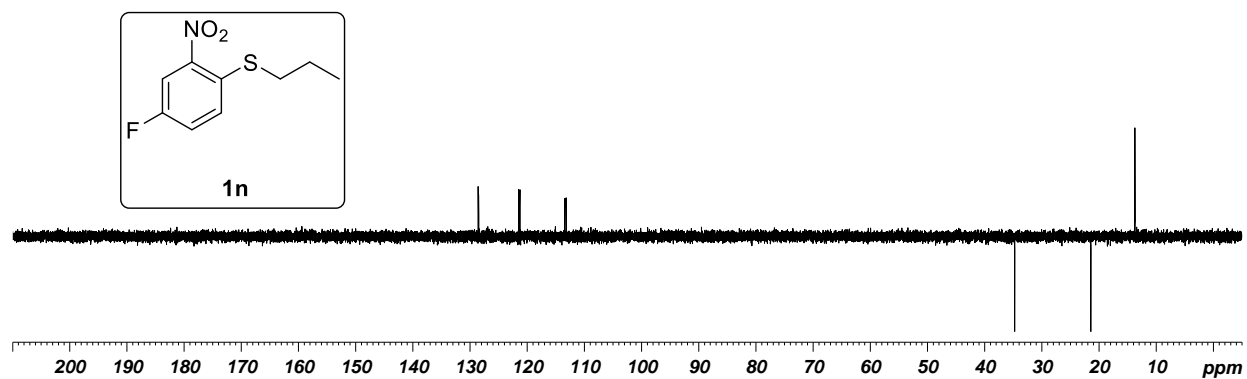

160.38  
157.91  
146.64  
146.56  
133.54  
133.51  
128.61  
128.54  
121.52  
121.30  
113.46  
113.20  
77.48  
77.16  
76.84  
34.83  
21.53  
13.79

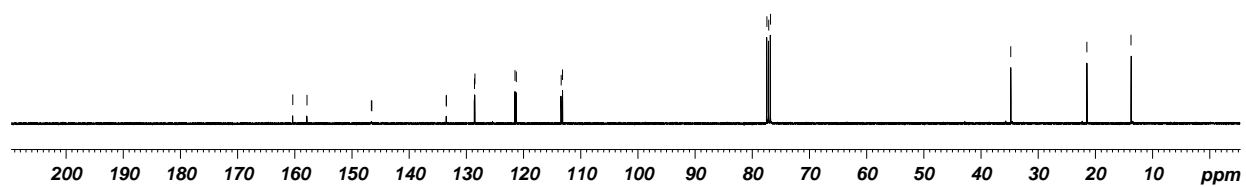Compound **1n**, Dept135, <sup>13</sup>C-NMR, 100MHz, CDCl<sub>3</sub>

Compound 19 H CDCl3

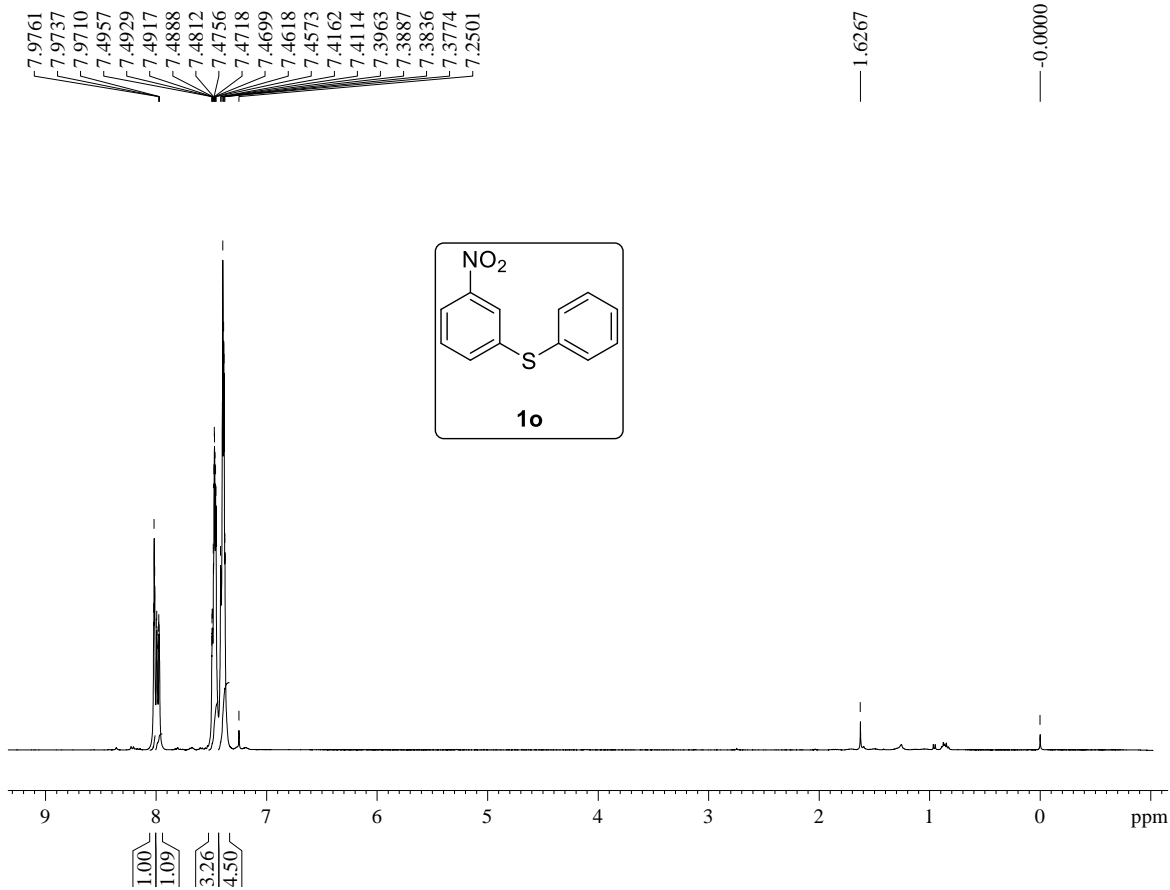

Compound **1o**, <sup>1</sup>H-NMR, 400MHz, CDCl<sub>3</sub>

Compound 19 C13 CDCl3

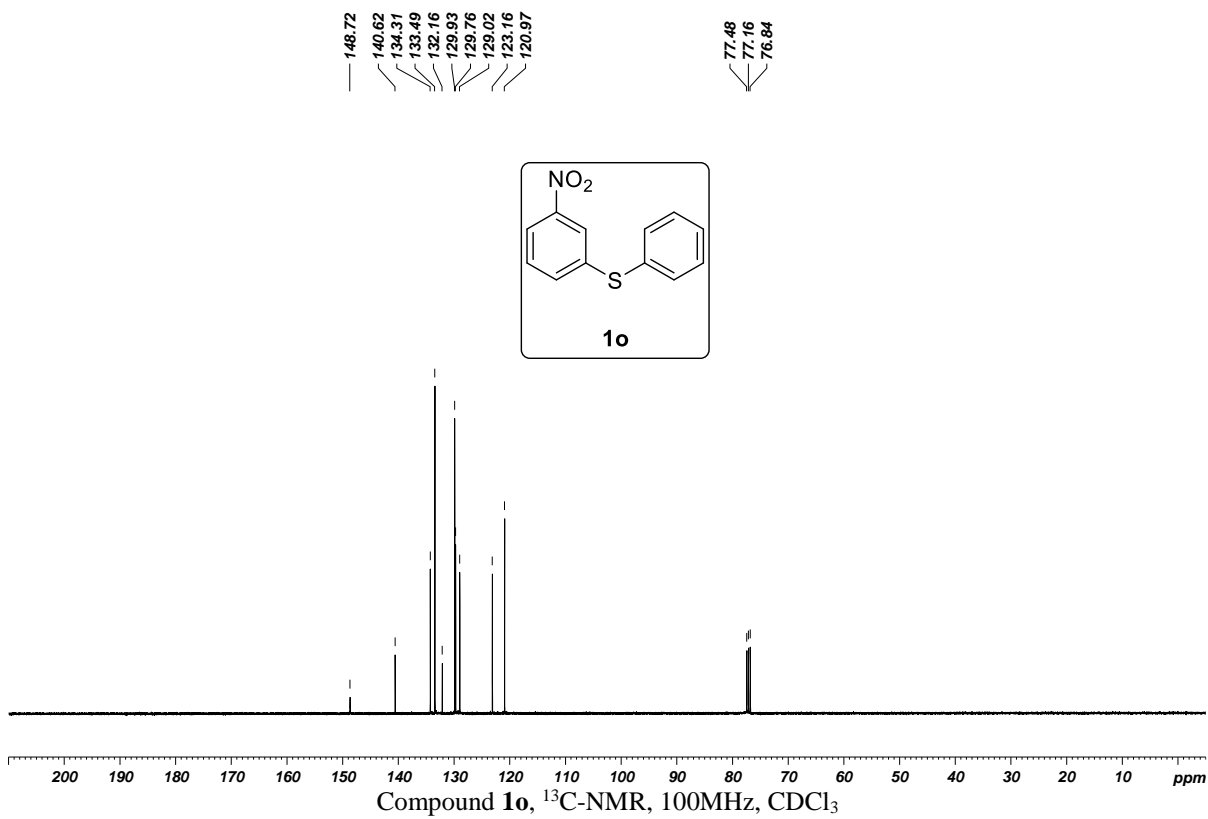

Compound **1o**, <sup>13</sup>C-NMR, 100MHz, CDCl<sub>3</sub>



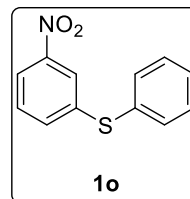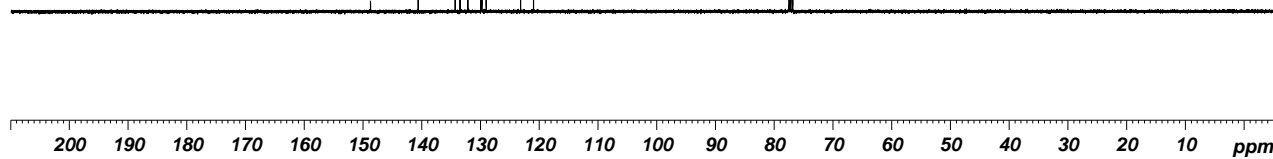

148.72  
140.62  
134.31  
133.49  
132.76  
129.93  
129.76  
129.02  
123.16  
120.97

77.48  
77.16  
76.84

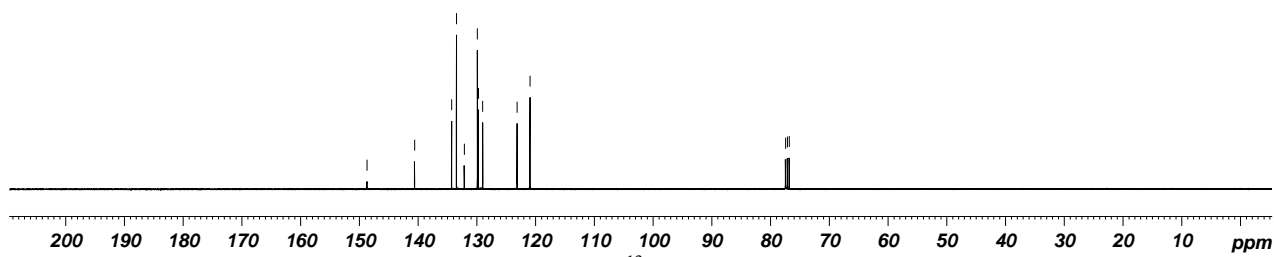

Compound **1o**, DEPT135, <sup>13</sup>C-NMR, 100MHz, CDCl<sub>3</sub>

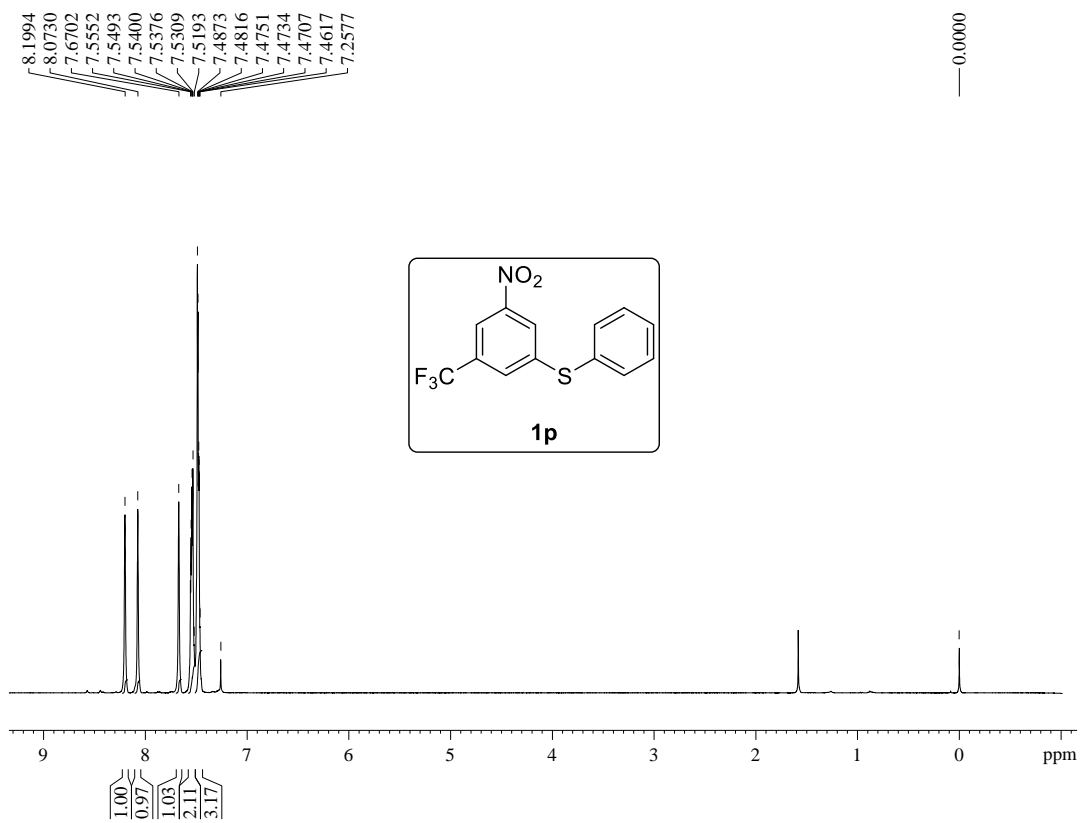Compound **1p**, <sup>1</sup>H-NMR, 400MHz, CDCl<sub>3</sub>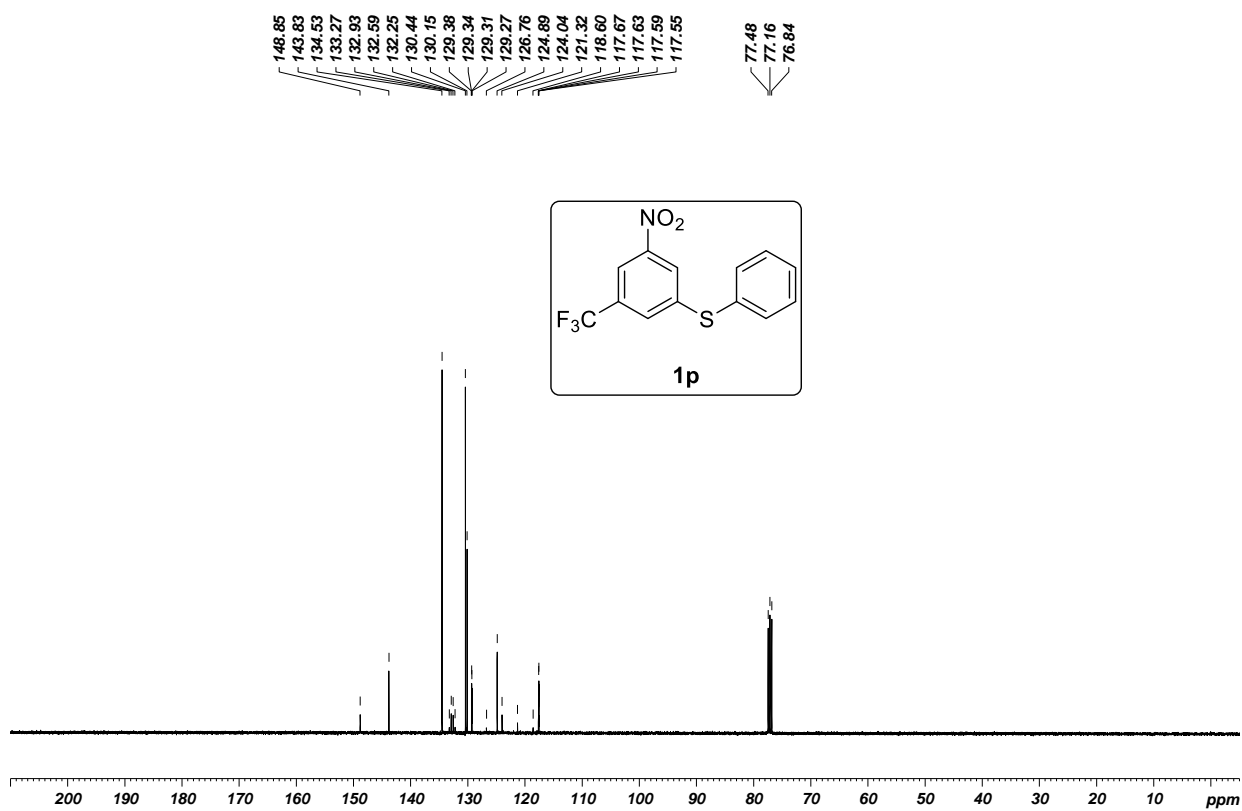Compound **1p**, <sup>13</sup>C-NMR, 100MHz, CDCl<sub>3</sub>

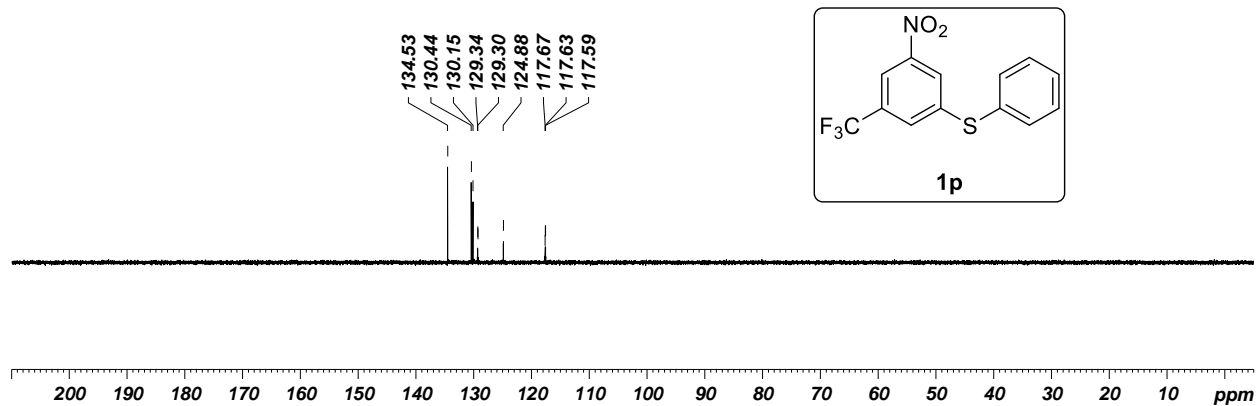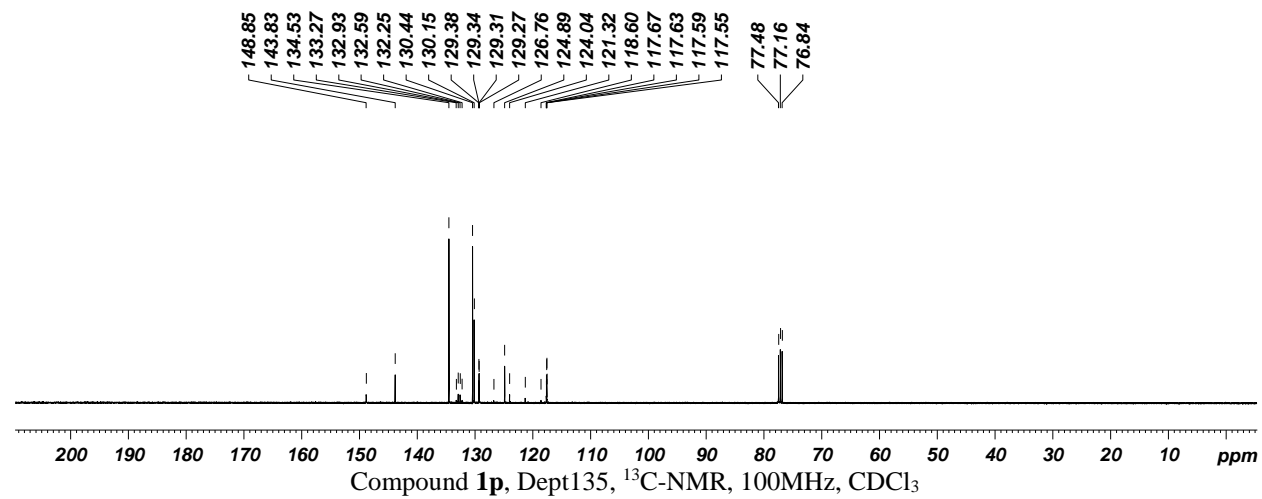

Compound 25 H CDCl3

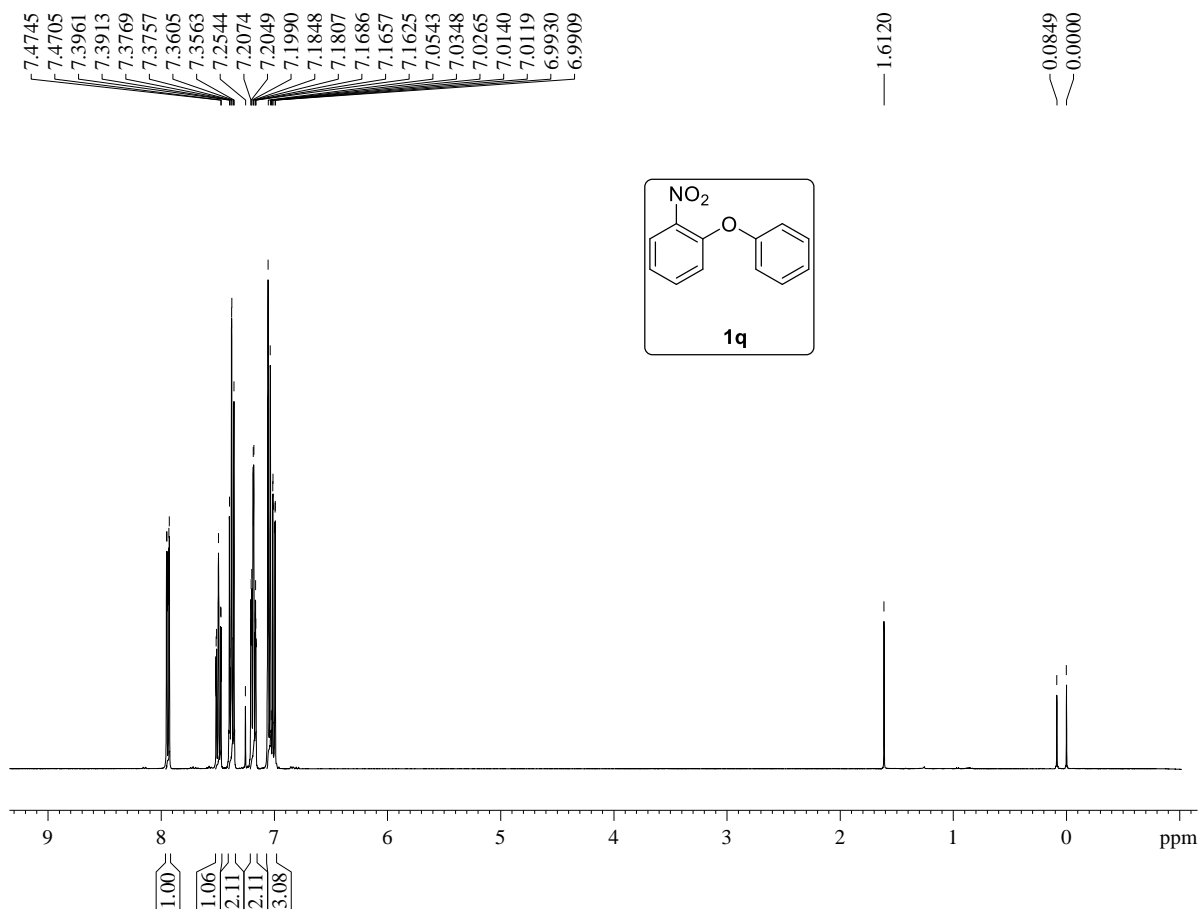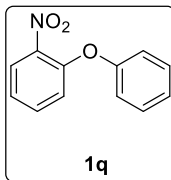

Compound **1q**, <sup>1</sup>H-NMR, 400MHz, CDCl<sub>3</sub>

Compound 25 C13 CDCl3

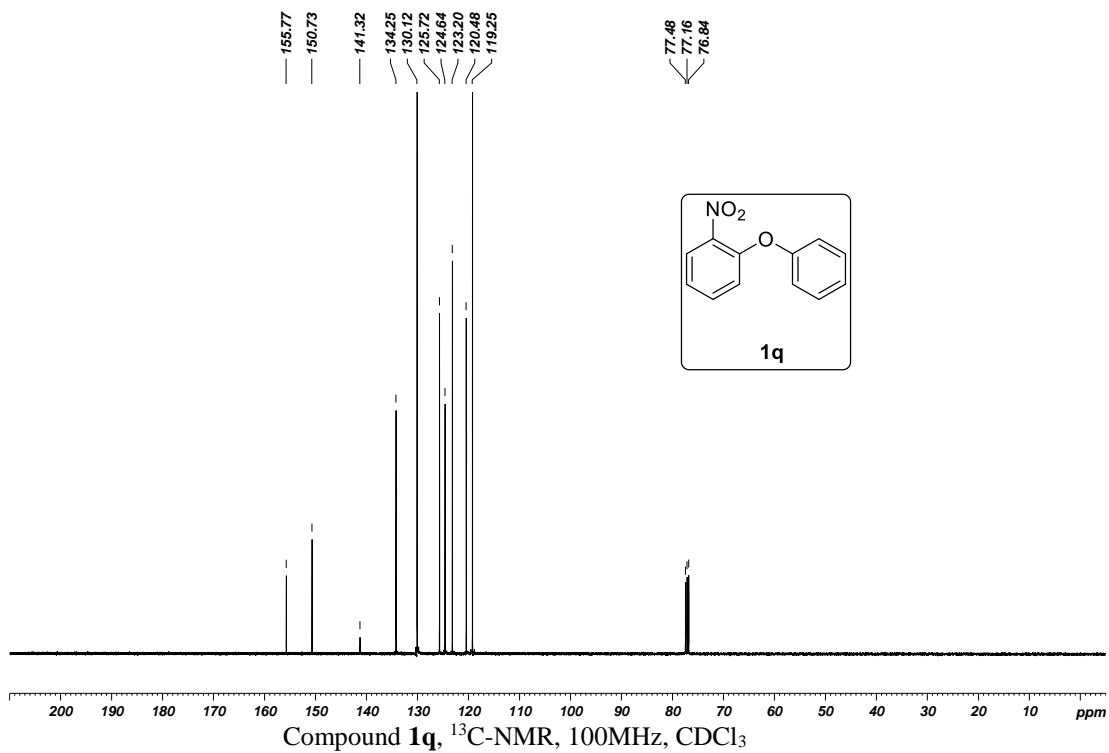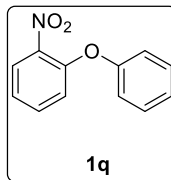

Compound **1q**, <sup>13</sup>C-NMR, 100MHz, CDCl<sub>3</sub>

Compound 25 DEPT135 CDCl<sub>3</sub>

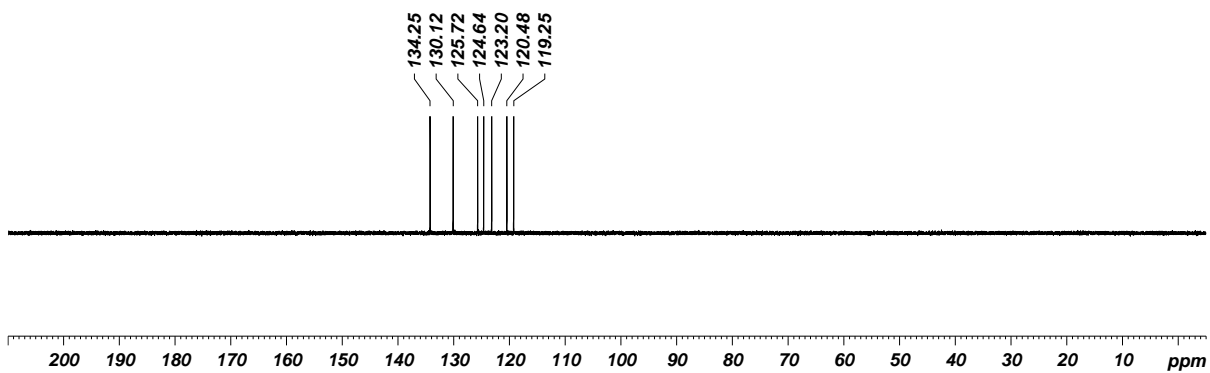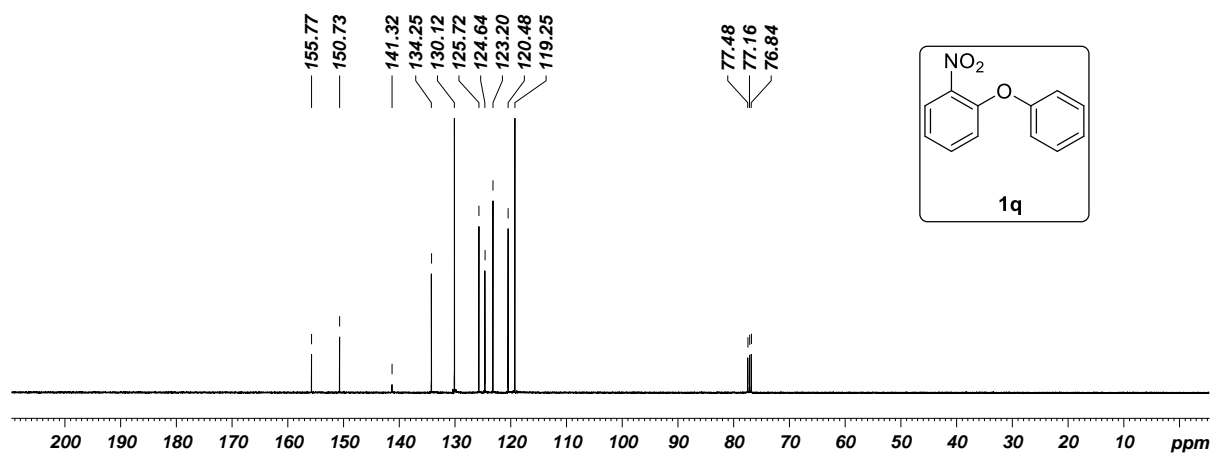

Compound **1q**, Dept135, <sup>13</sup>C-NMR, 100MHz, CDCl<sub>3</sub>

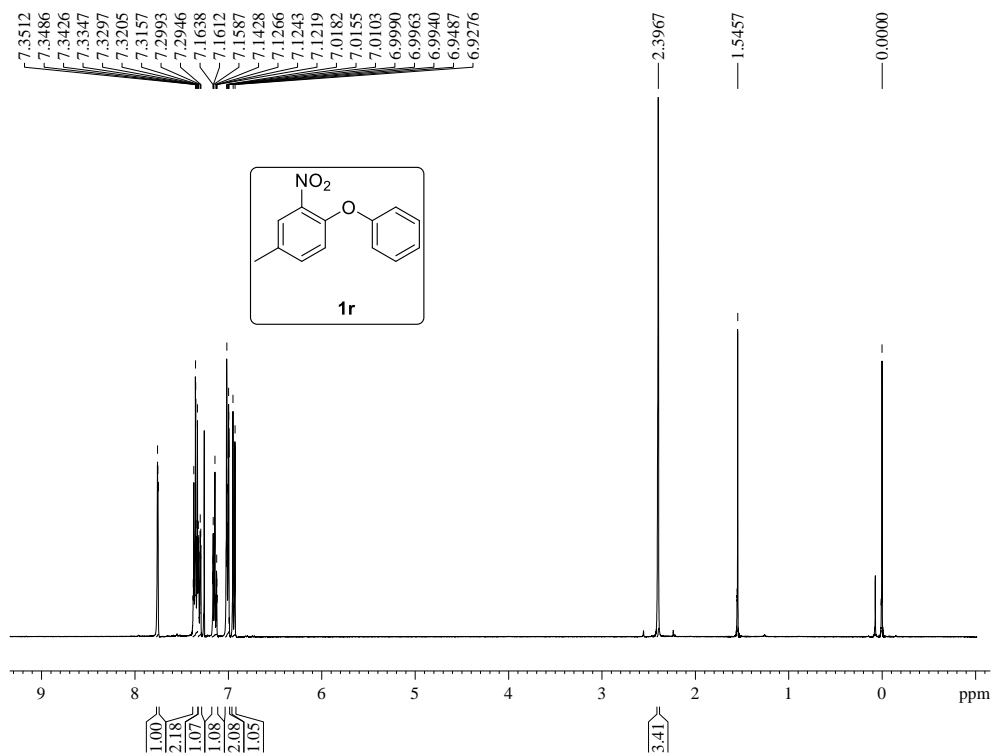Compound **1r**, <sup>1</sup>H-NMR, 400MHz, CDCl<sub>3</sub>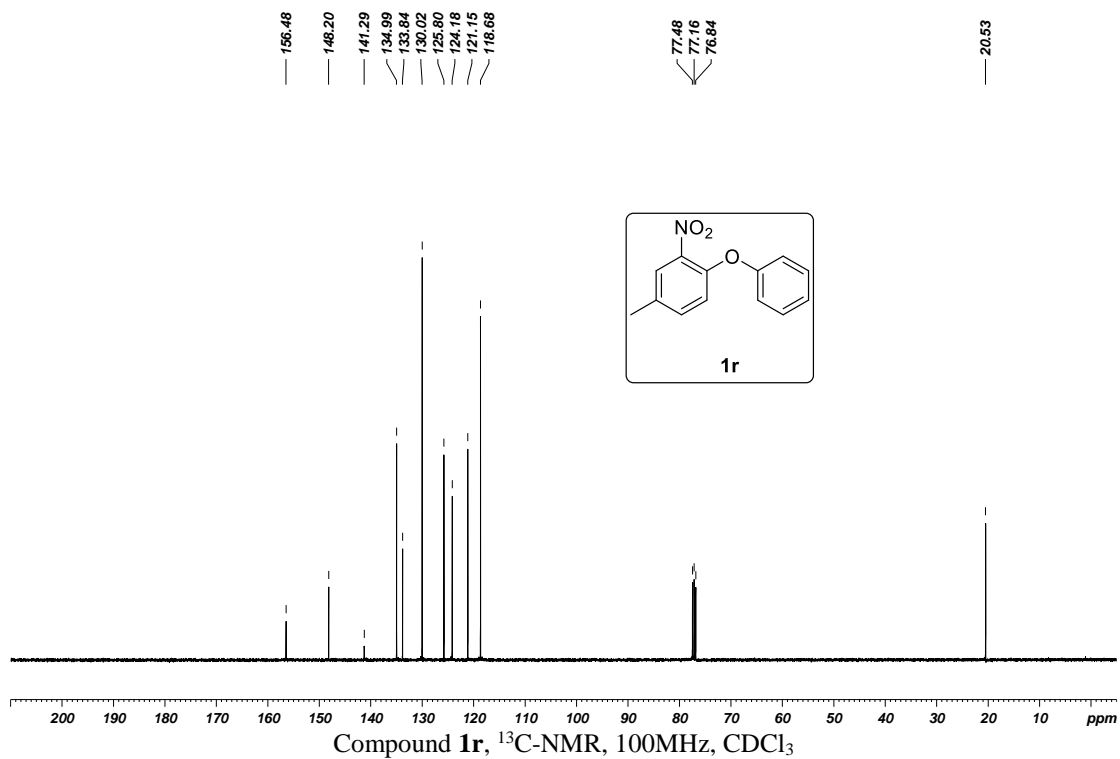Compound **1r**, <sup>13</sup>C-NMR, 100MHz, CDCl<sub>3</sub>

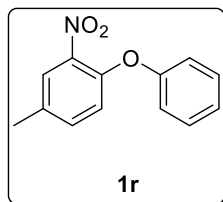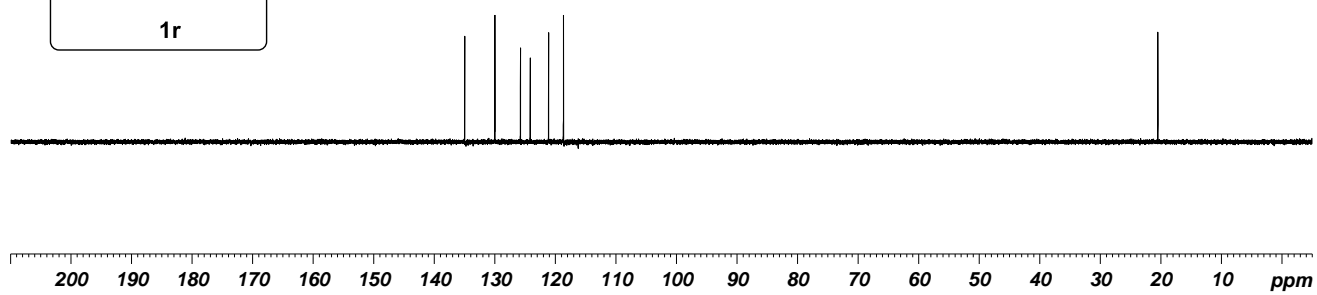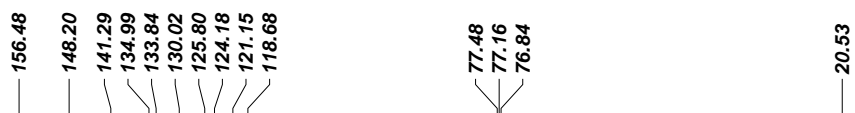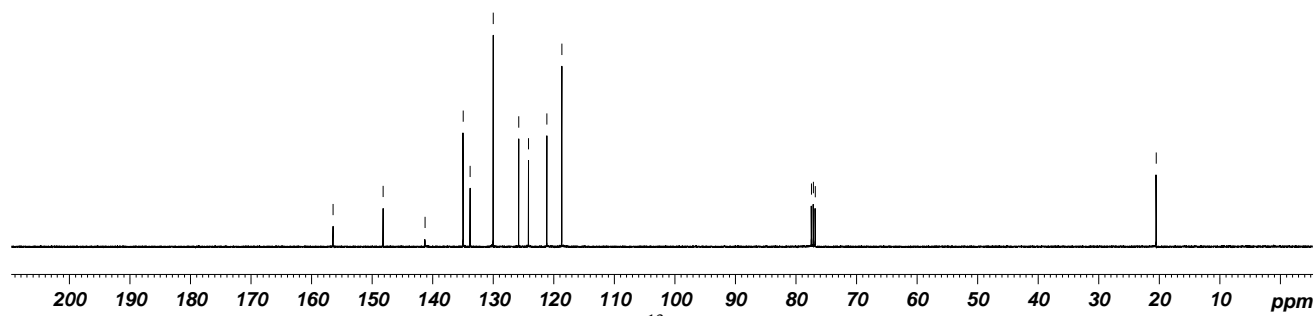Compound **1r**, Dept135,  $^{13}\text{C}$ -NMR, 100MHz,  $\text{CDCl}_3$

Compound 27 H CDCl3

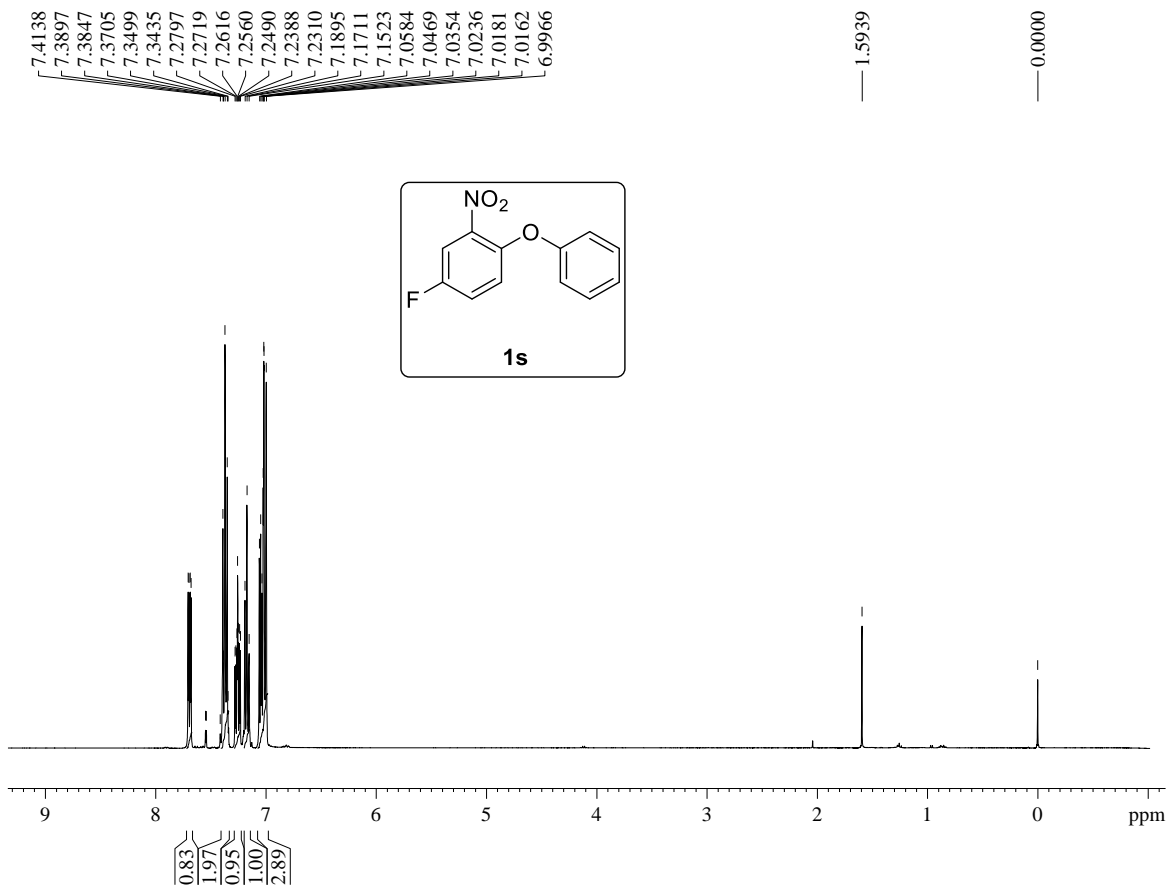

Compound **1s**, <sup>1</sup>H-NMR, 400MHz, CDCl<sub>3</sub>

Compound 27 C13 CDCl3

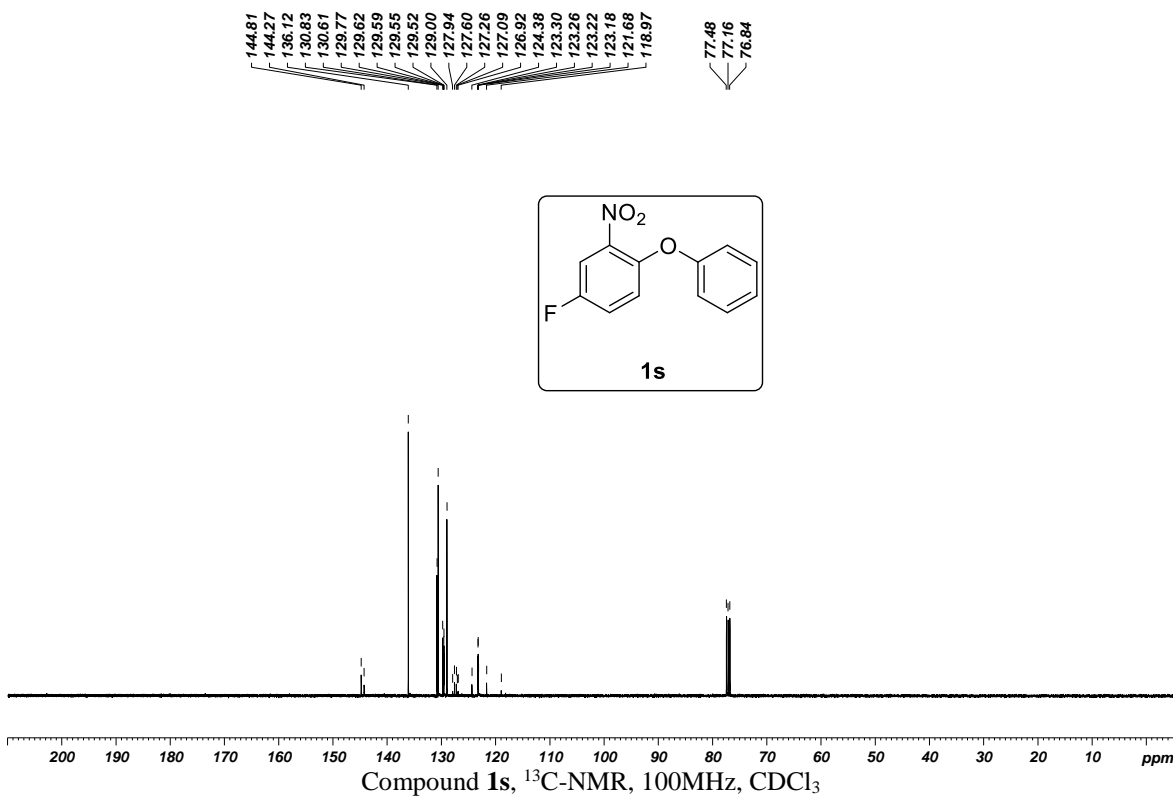

Compound **1s**, <sup>13</sup>C-NMR, 100MHz, CDCl<sub>3</sub>



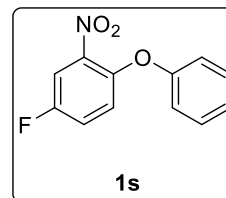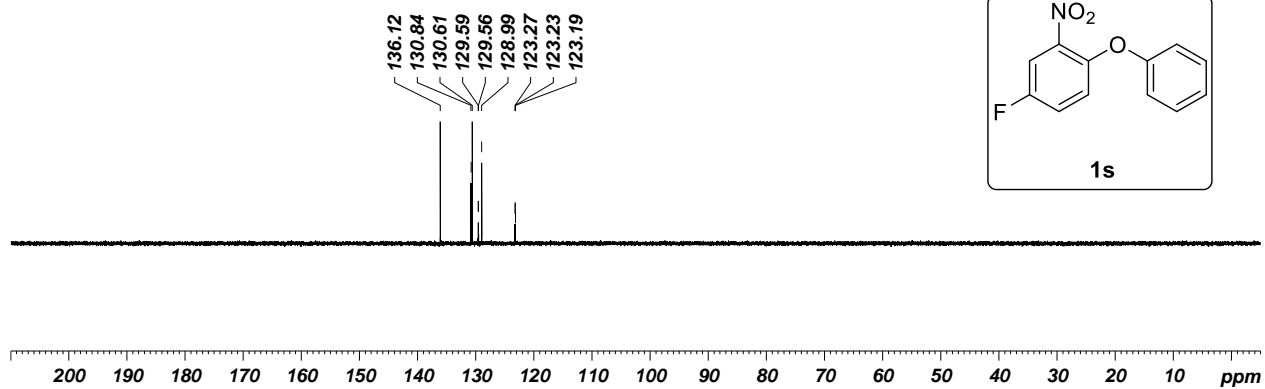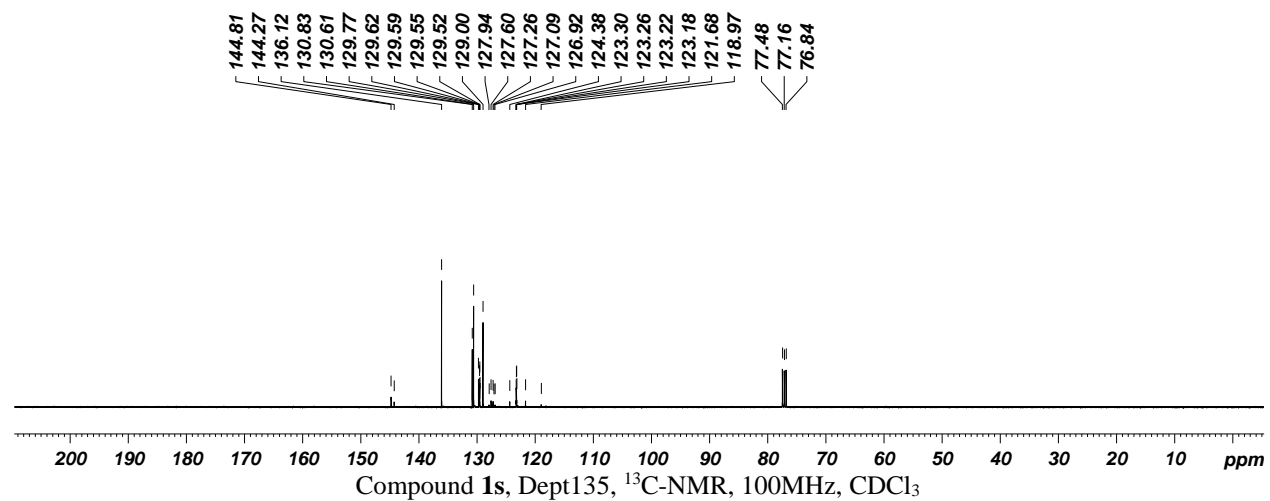

7.5329  
7.5220  
7.5146  
7.5086  
7.4967  
7.4775  
7.4590  
7.4418  
7.3253  
7.3216  
7.3072  
7.3036  
7.2885  
7.2842  
7.2641  
7.2610  
7.2467  
7.2435  
7.0023  
6.9986  
6.9823  
6.9795

— -0.0000

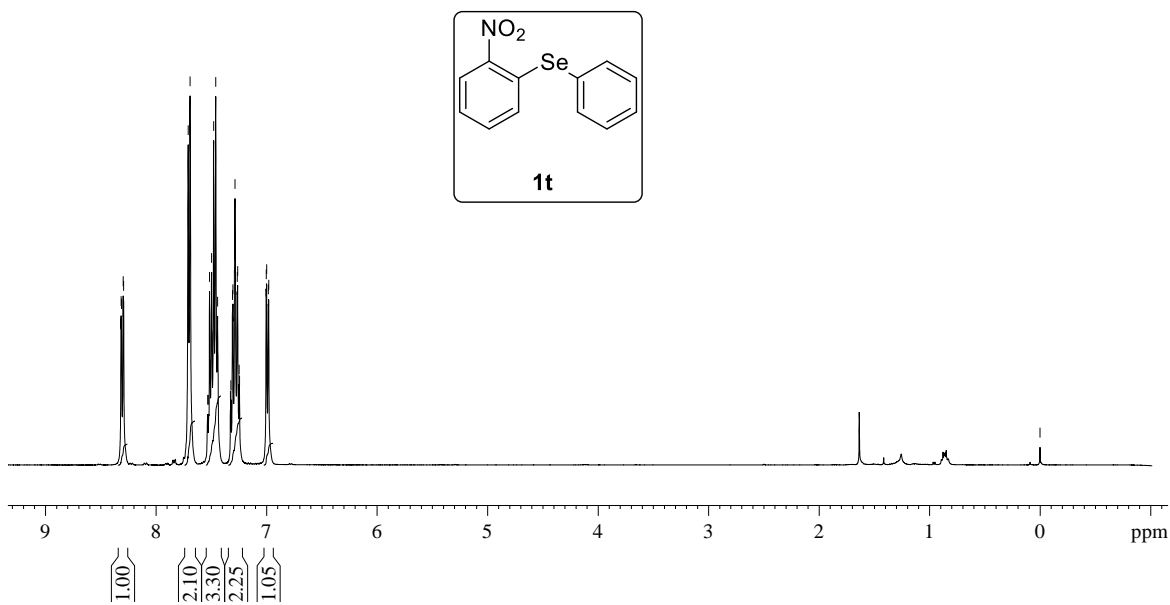

Compound 1t,  $^1\text{H-NMR}$ , 400MHz,  $\text{CDCl}_3$   
Compound 24 C13 CDCl3

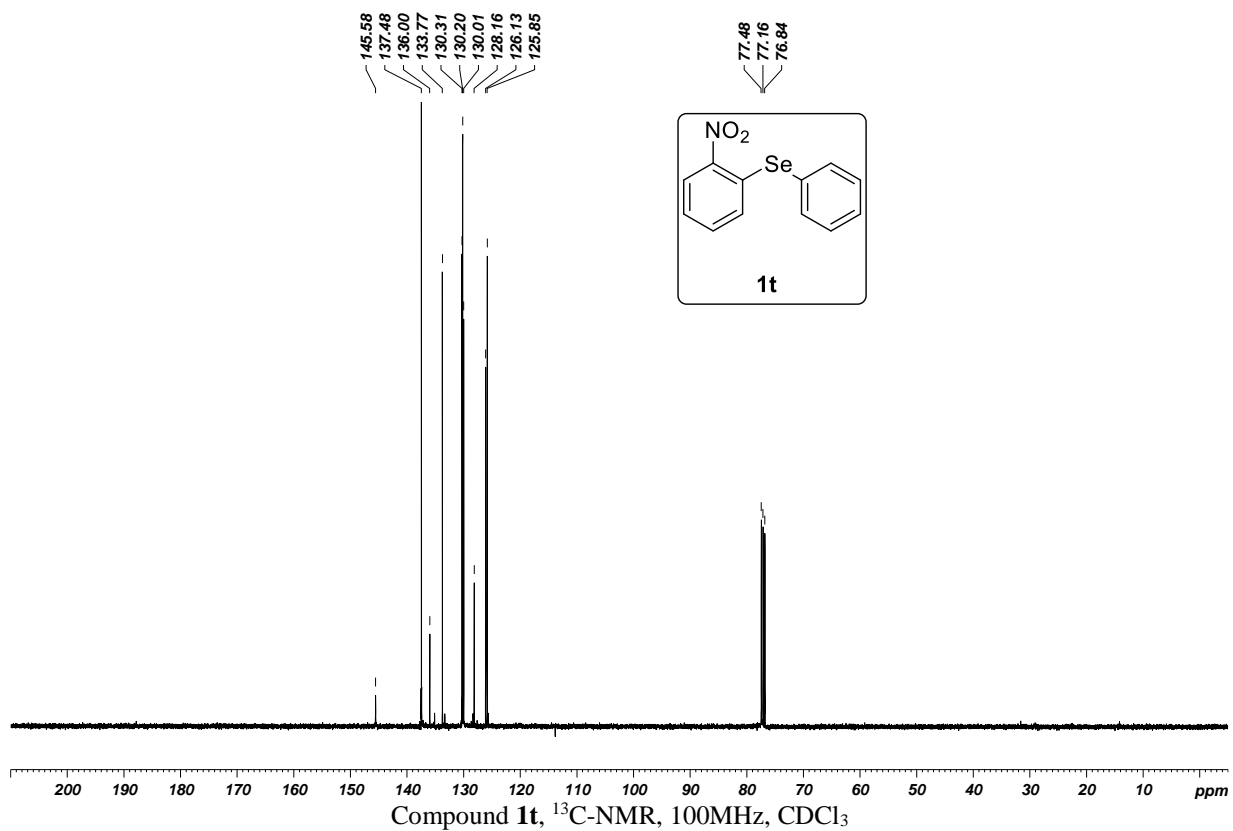

Compound 1t,  $^{13}\text{C-NMR}$ , 100MHz,  $\text{CDCl}_3$

compound 24 DEPT135 CDCl3

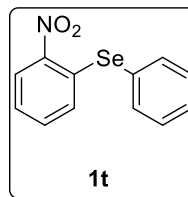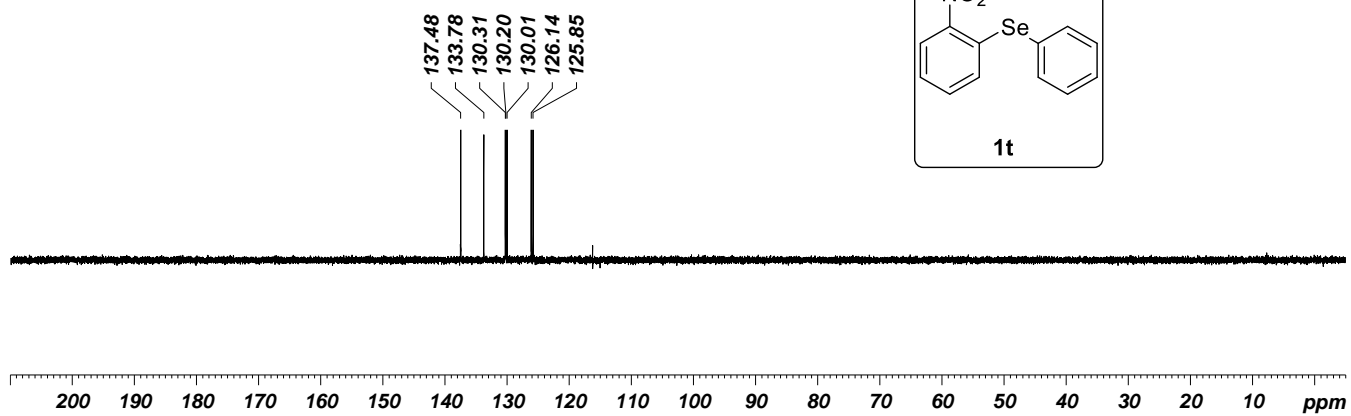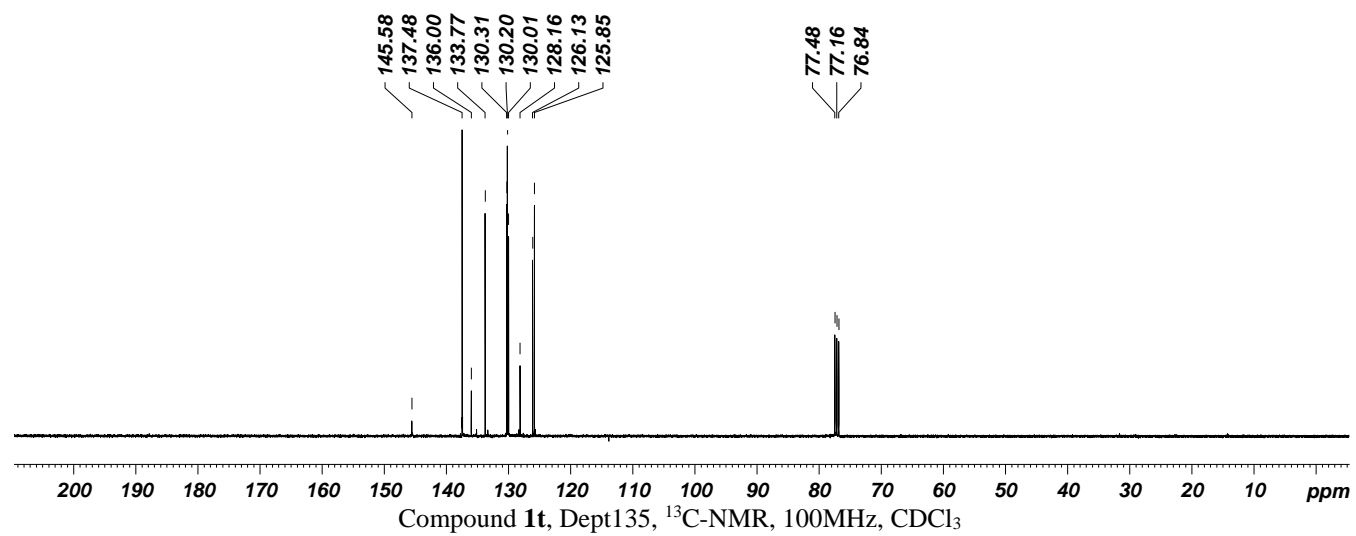

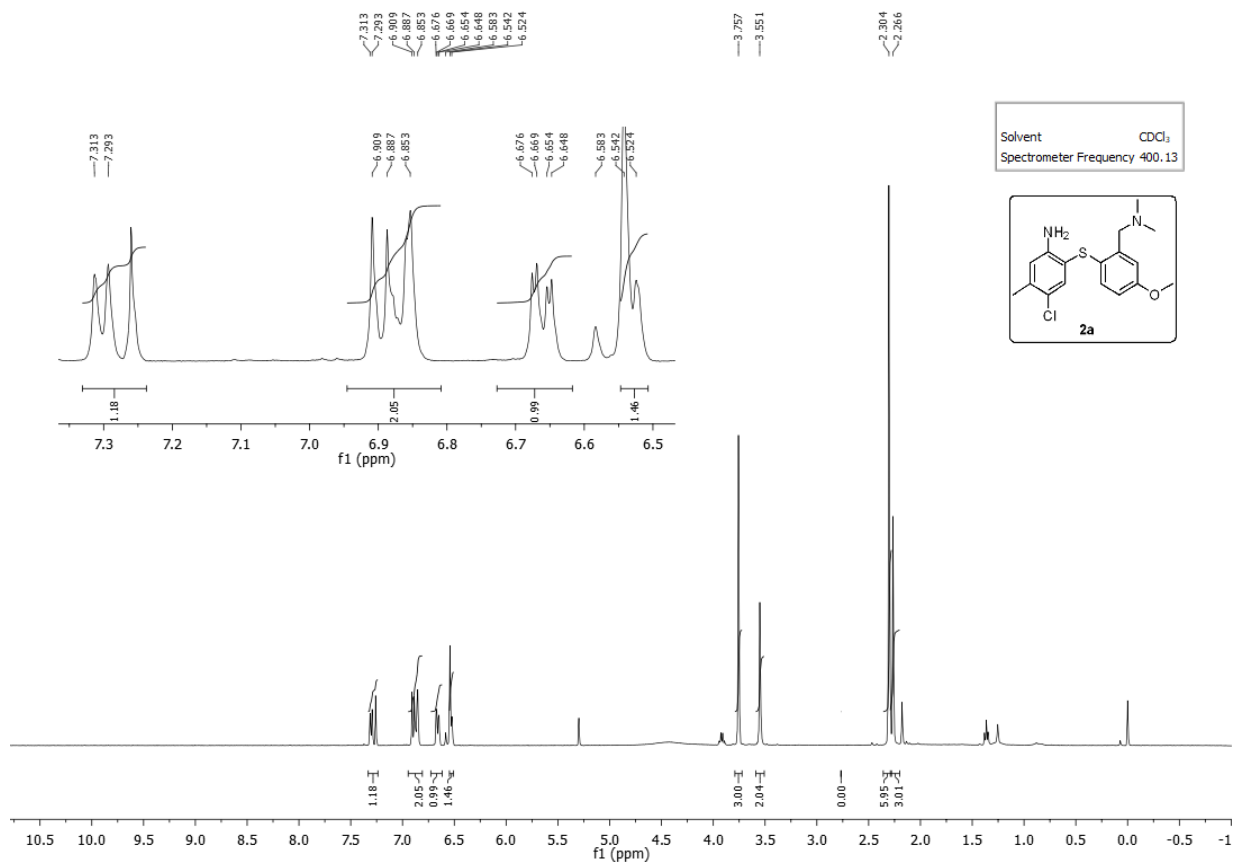

Compound **2a**,  $^1\text{H-NMR}$ , 400MHz,  $\text{CDCl}_3$

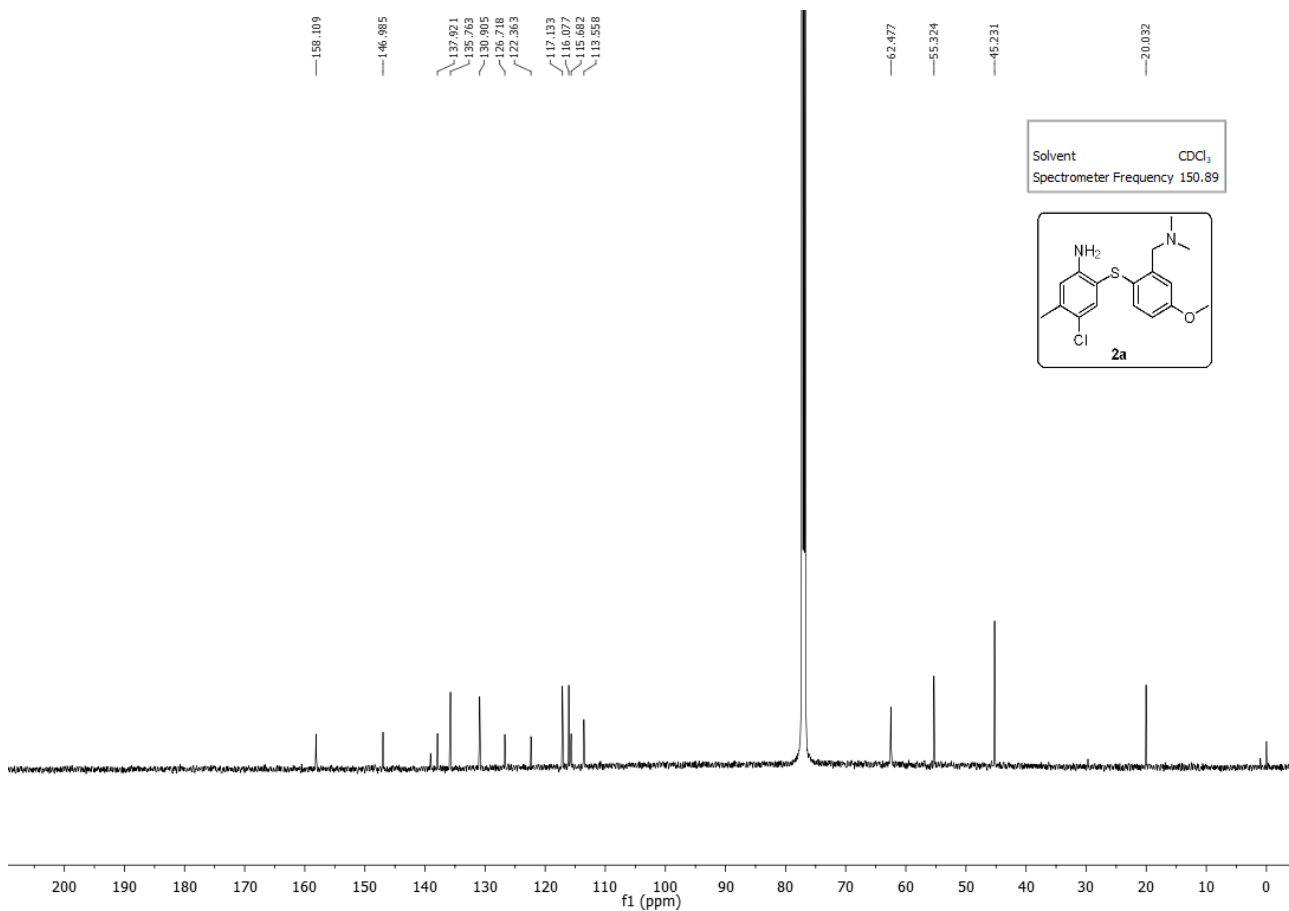

Compound **2a**,  $^{13}\text{C-NMR}$ , 150MHz,  $\text{CDCl}_3$

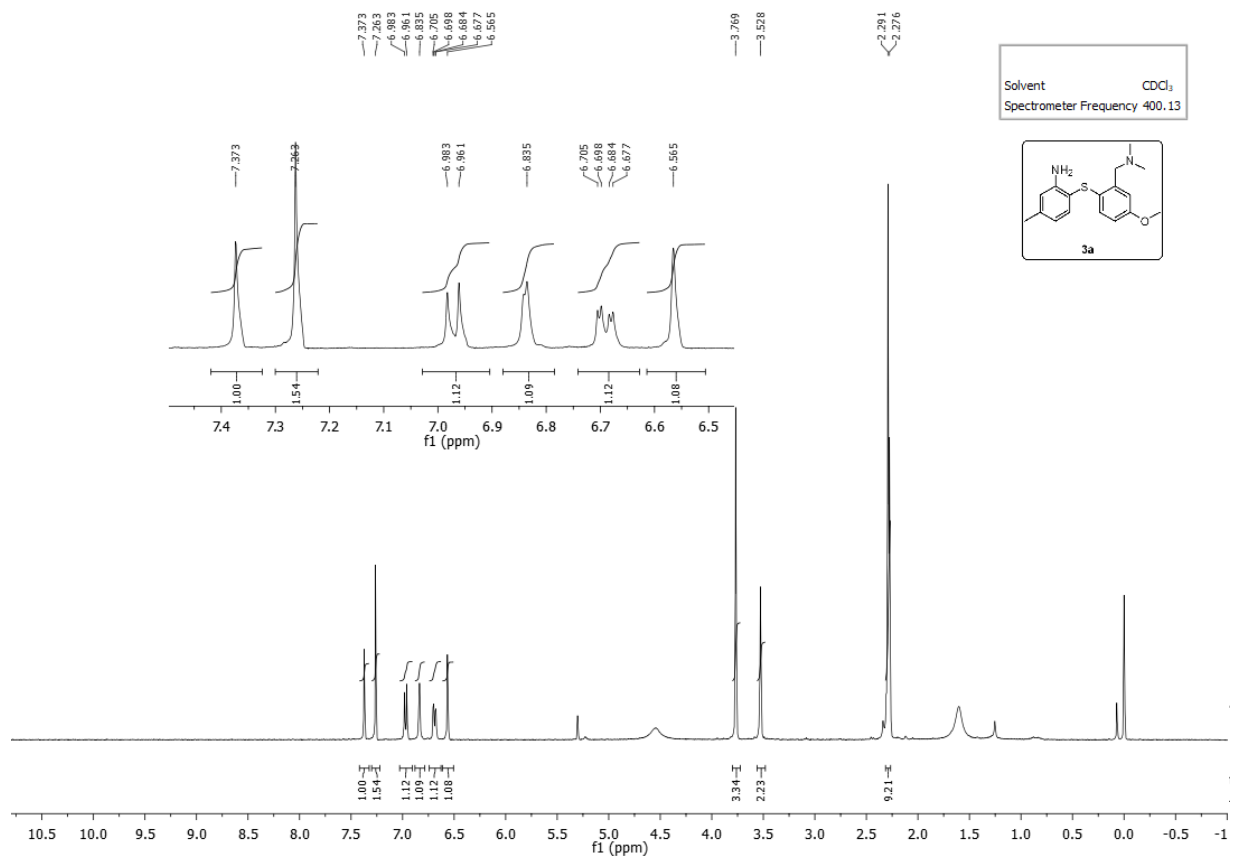

Compound **3a**,  $^1\text{H-NMR}$ , 400MHz,  $\text{CDCl}_3$

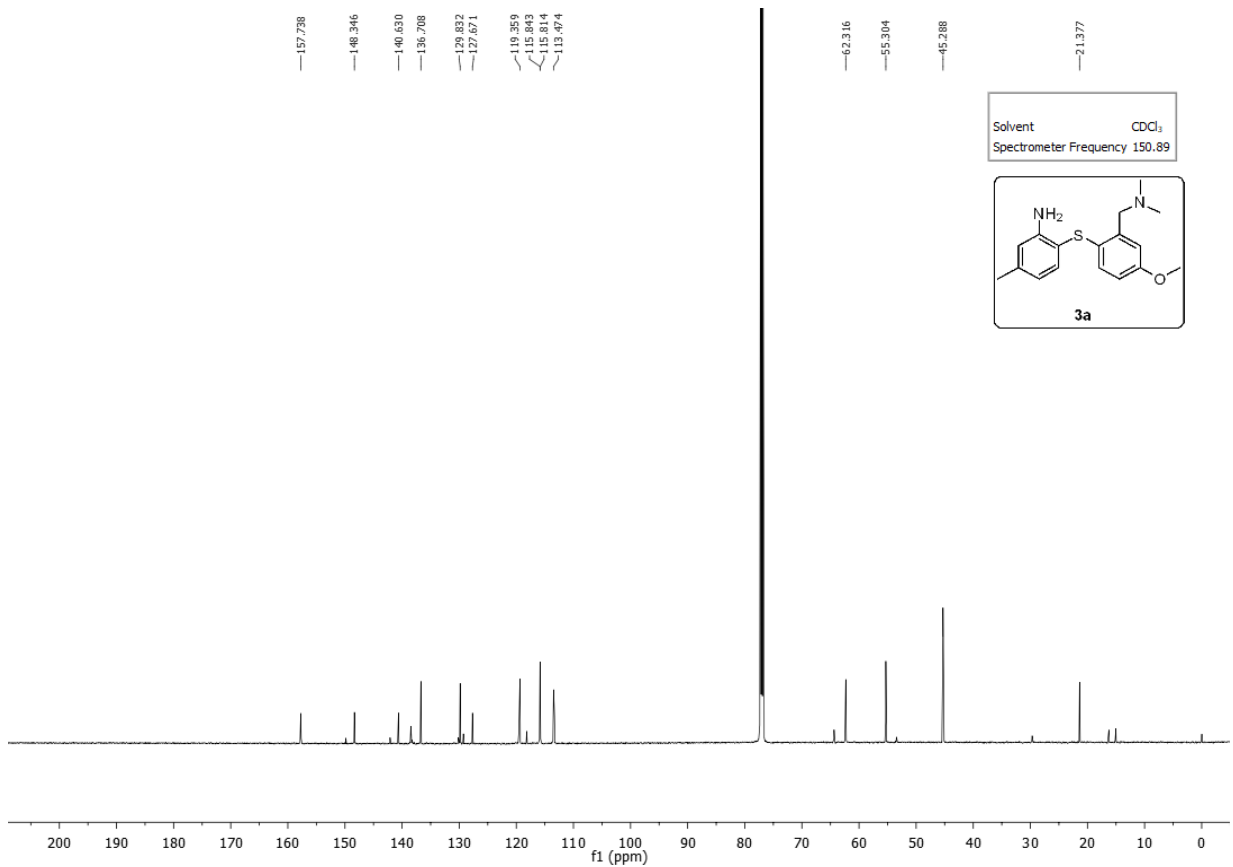

Compound **3a**,  $^{13}\text{C-NMR}$ , 150MHz,  $\text{CDCl}_3$

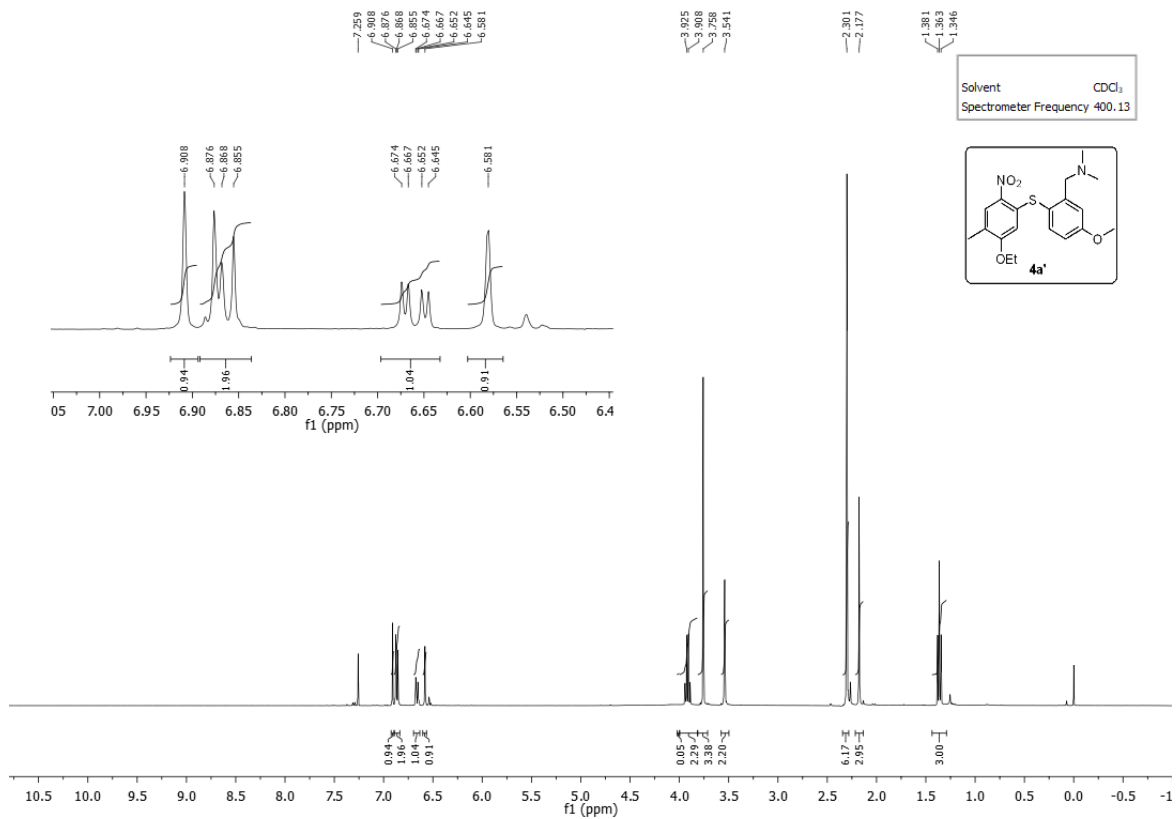

Compound **4a'**,  $^1\text{H-NMR}$ , 400MHz,  $\text{CDCl}_3$

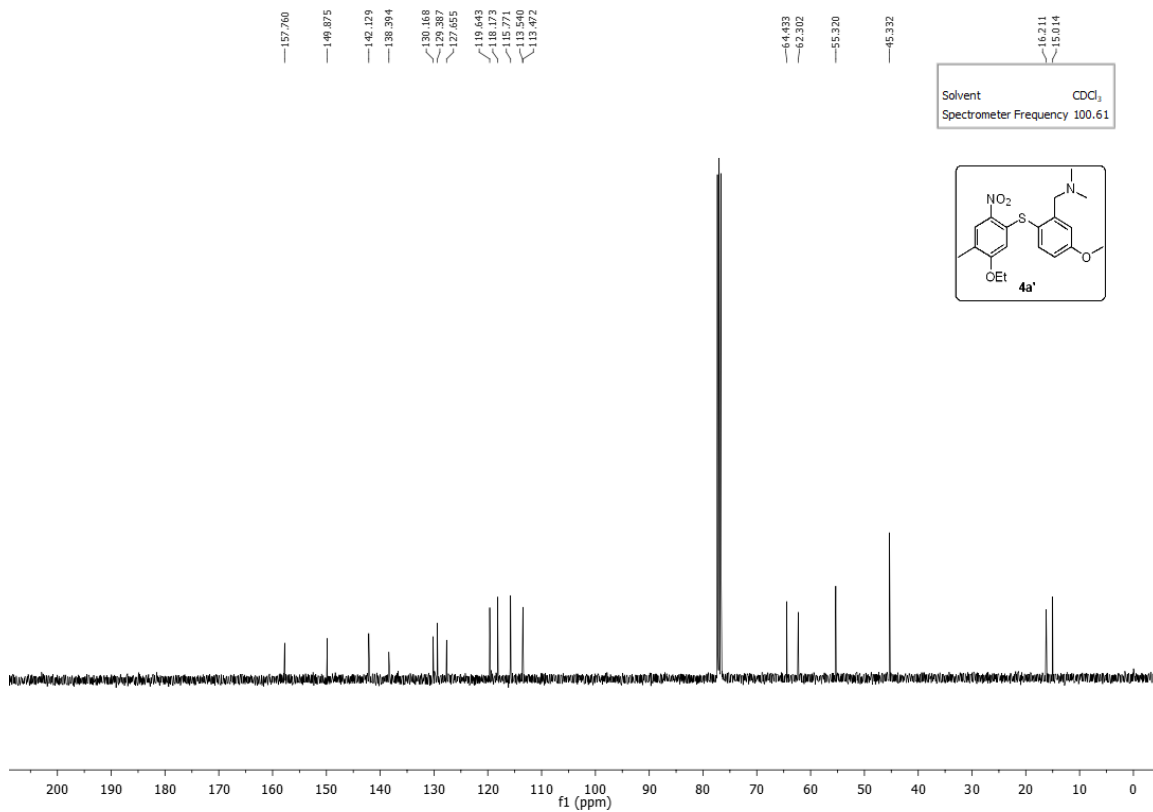

Compound **4a'**,  $^{13}\text{C-NMR}$ , 100MHz,  $\text{CDCl}_3$

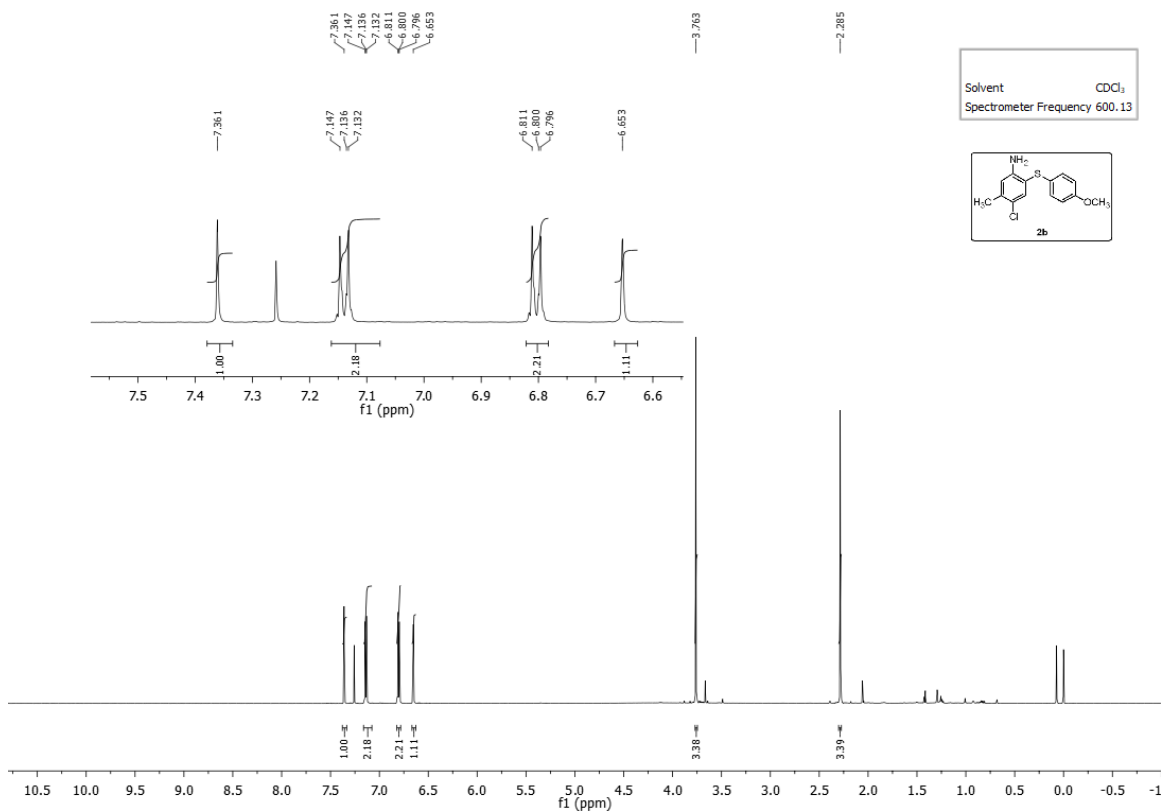

Compound **2b**,  $^1\text{H-NMR}$ , 600MHz,  $\text{CDCl}_3$

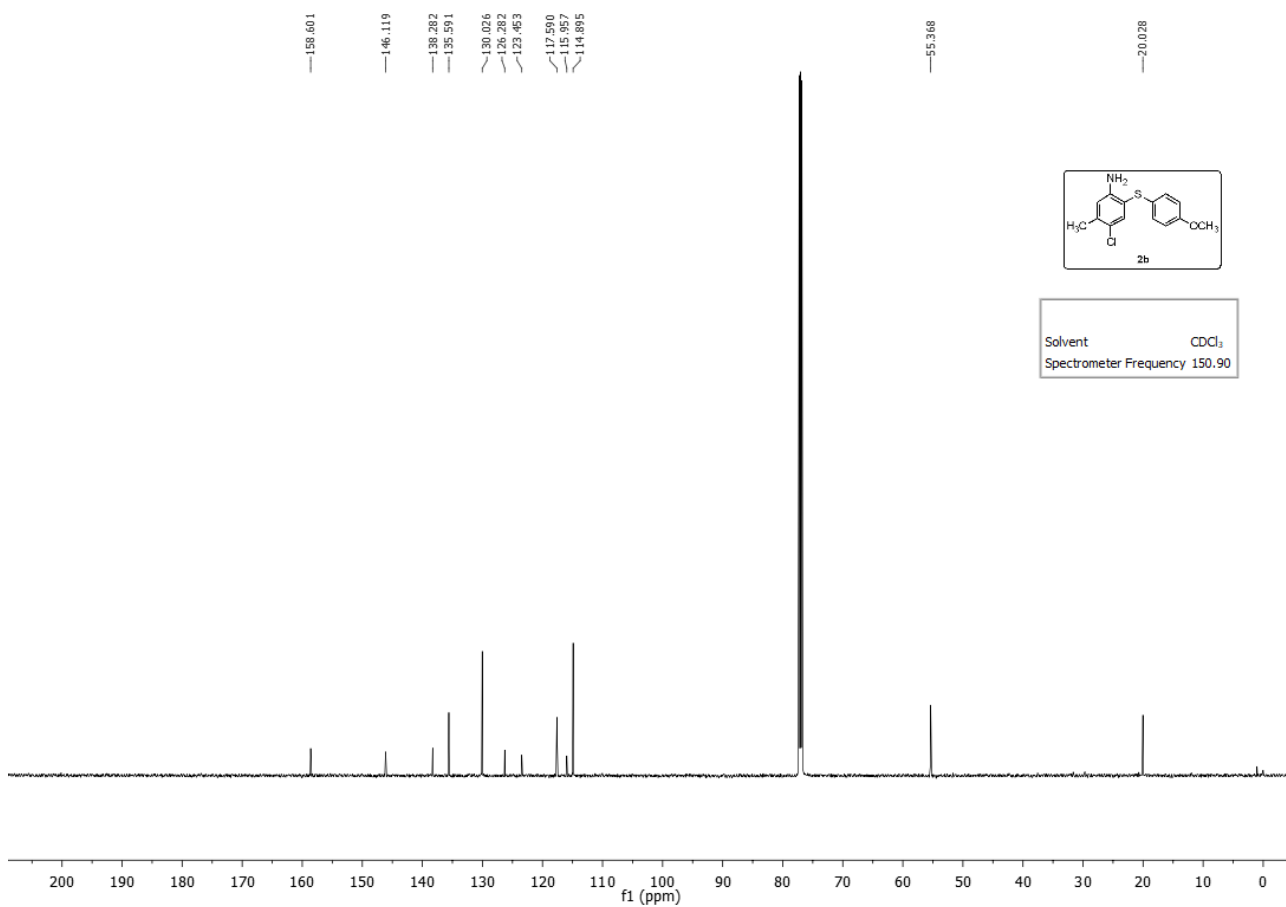

Compound **2b**,  $^{13}\text{C-NMR}$ , 150MHz,  $\text{CDCl}_3$

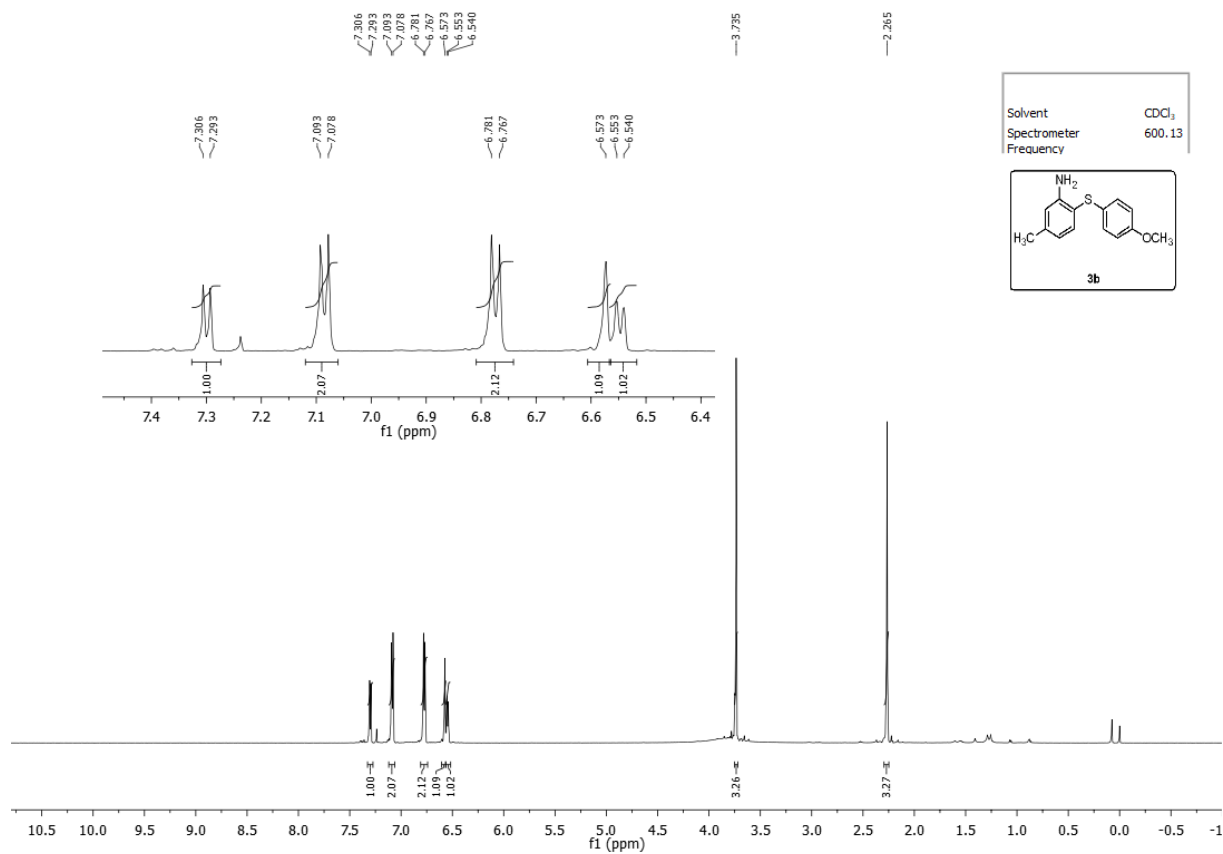

Compound **3b**,  $^1\text{H-NMR}$ , 600MHz,  $\text{CDCl}_3$

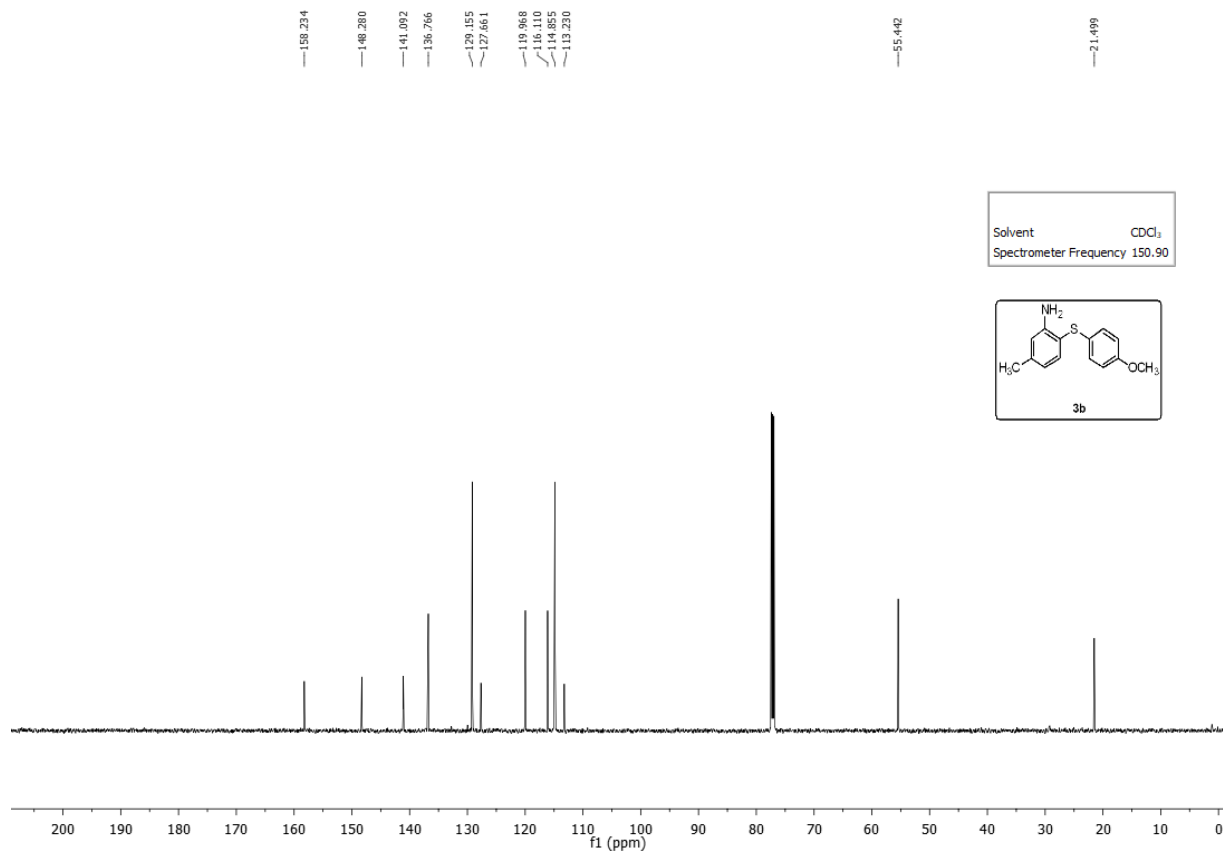

Compound **3b**,  $^{13}\text{C-NMR}$ , 150MHz,  $\text{CDCl}_3$



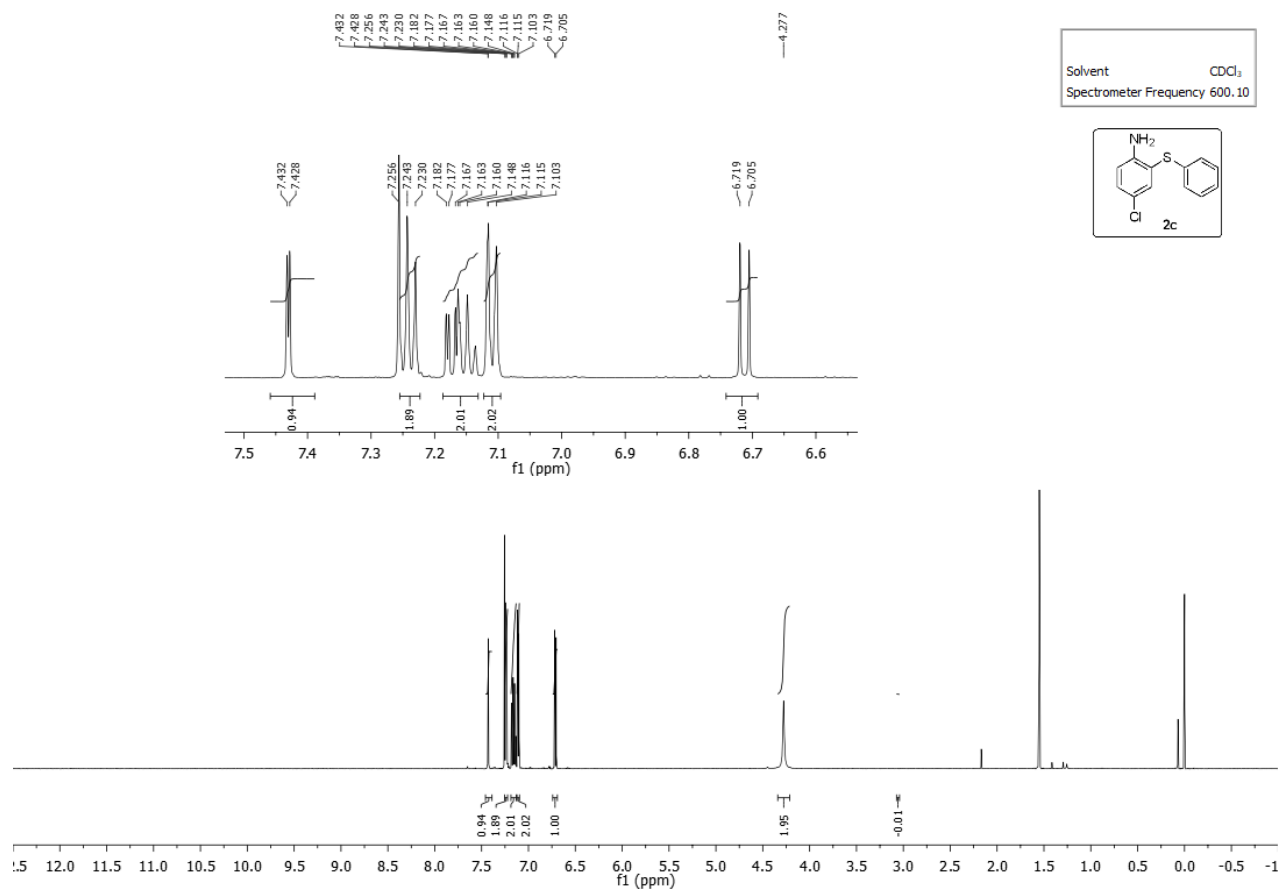

Compound 2c,  $^1\text{H-NMR}$ , 600MHz,  $\text{CDCl}_3$

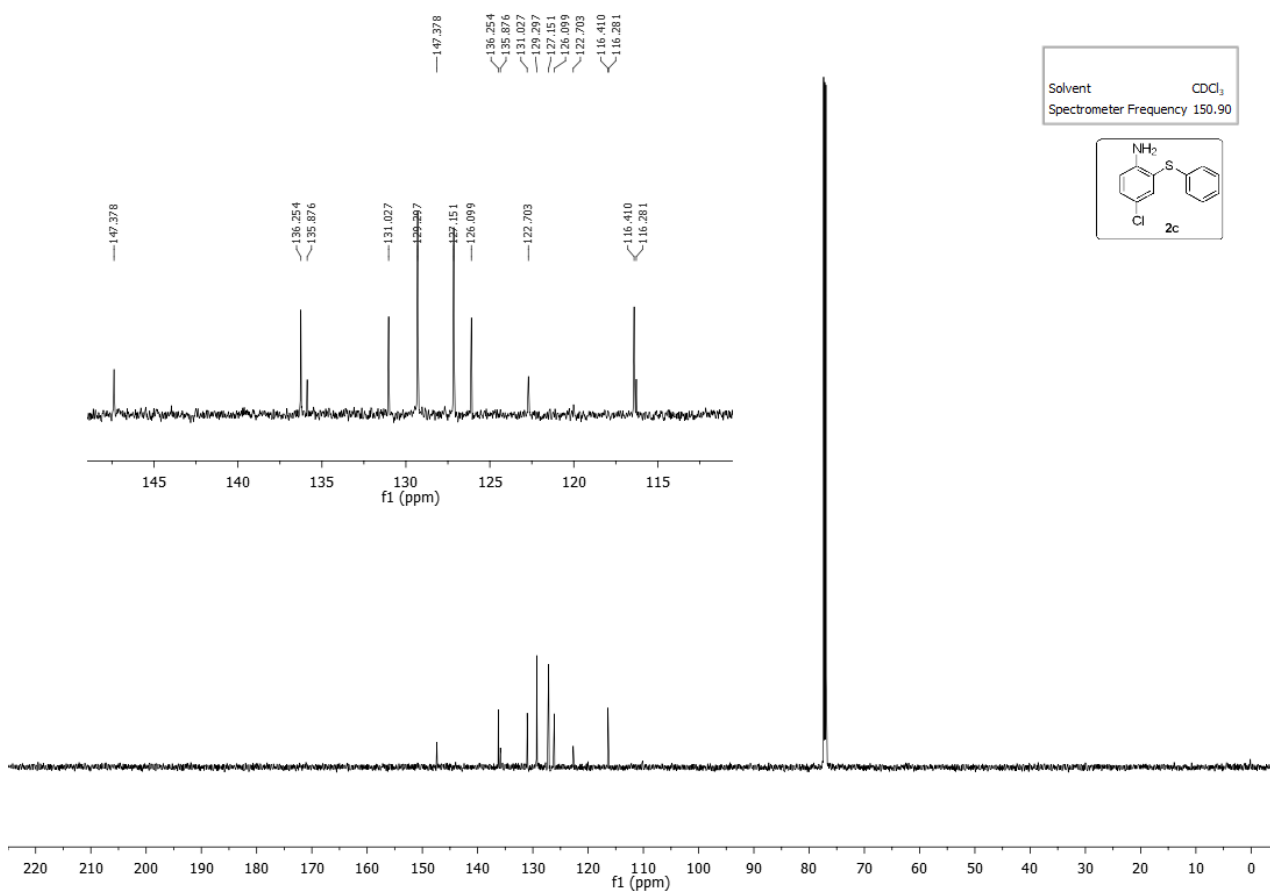

Compound 2c,  $^{13}\text{C-NMR}$ , 150MHz,  $\text{CDCl}_3$

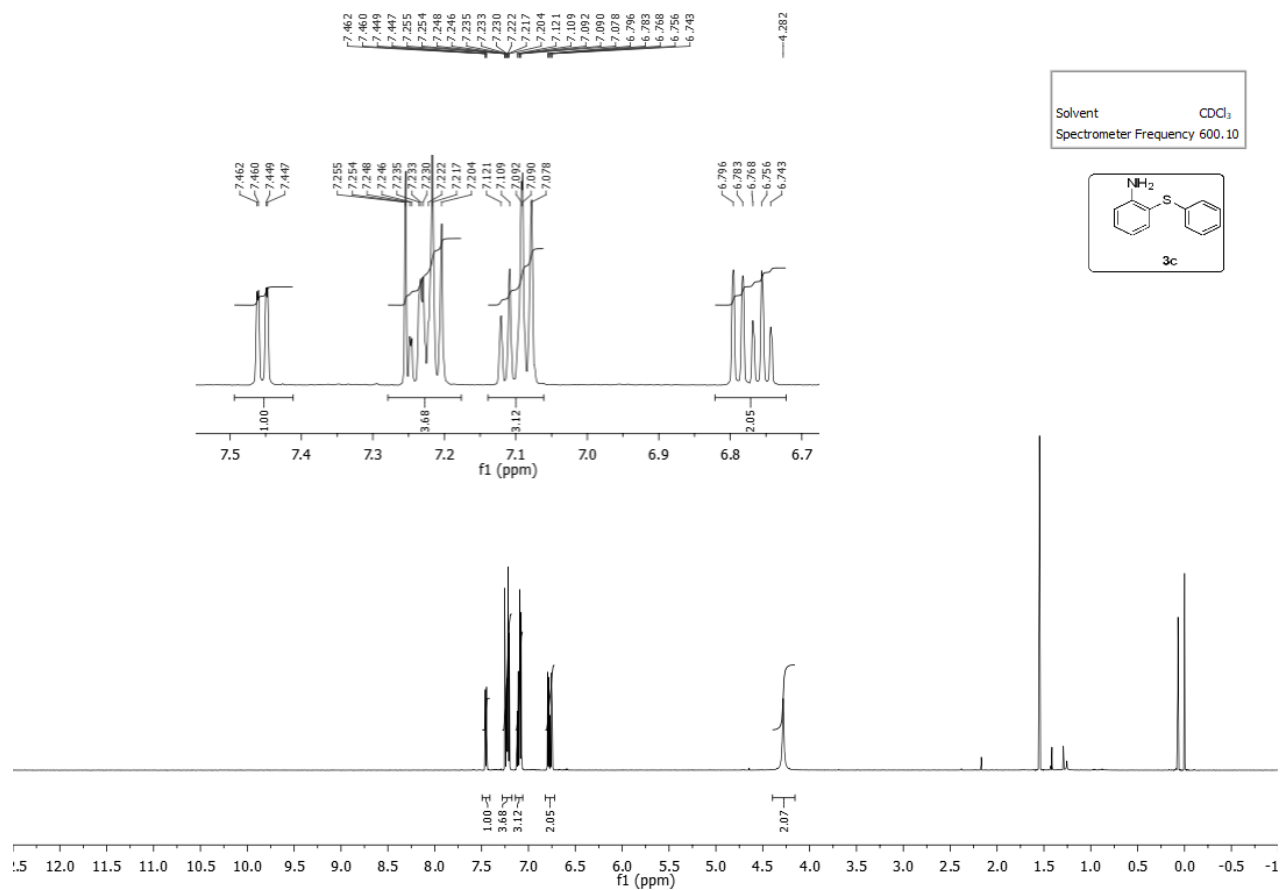

Compound **3c**,  $^1\text{H-NMR}$ , 600MHz,  $\text{CDCl}_3$

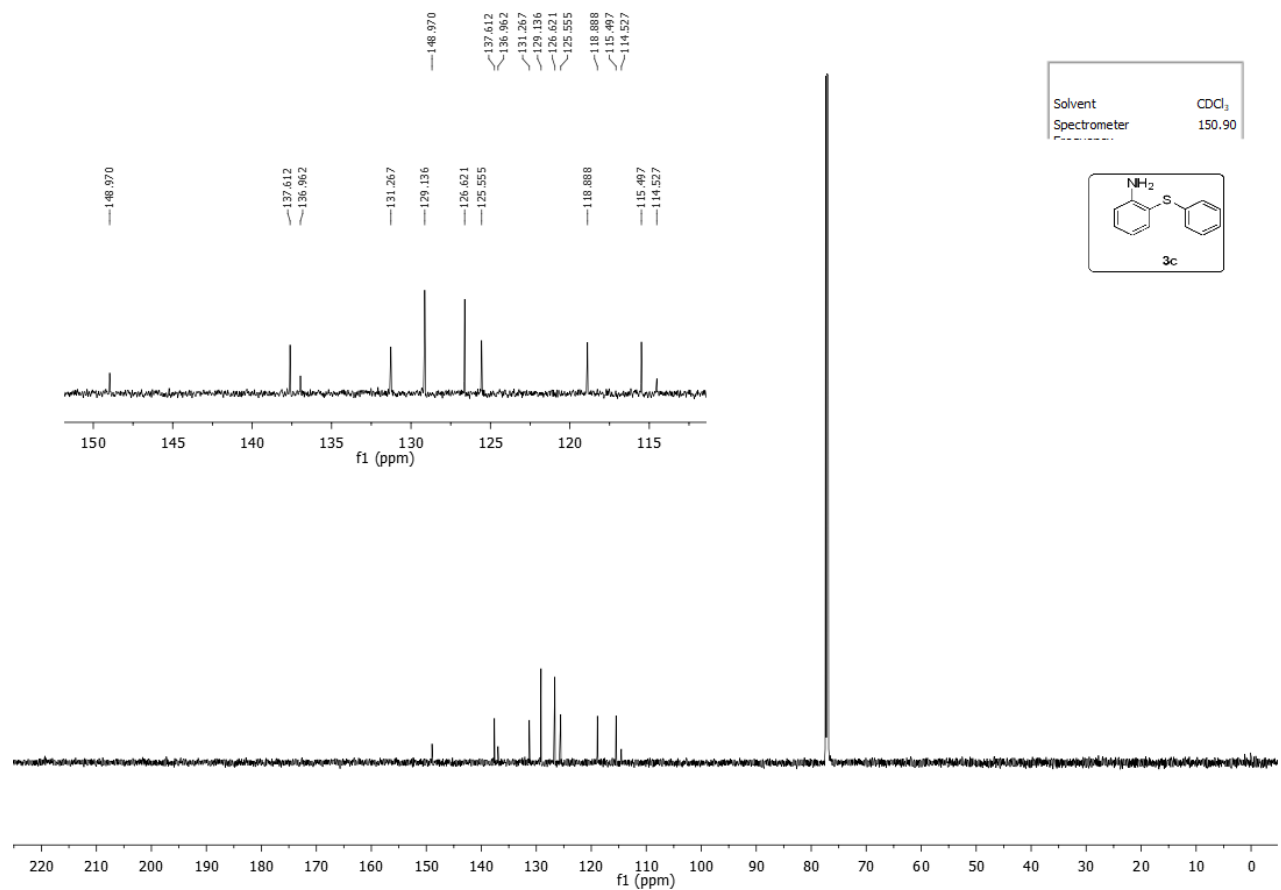

Compound **3c**,  $^{13}\text{C-NMR}$ , 150MHz,  $\text{CDCl}_3$

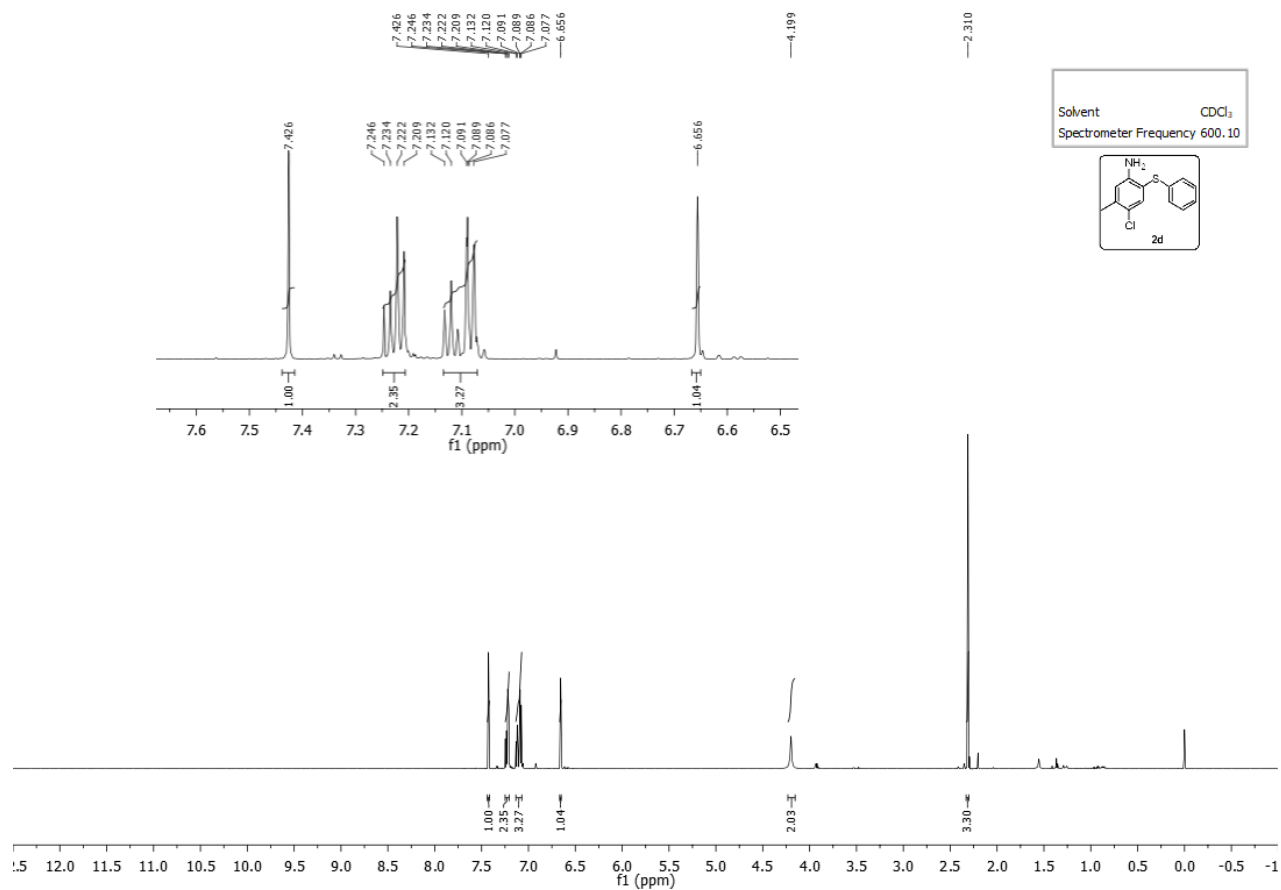

Compound 2d,  $^1\text{H-NMR}$ , 600MHz,  $\text{CDCl}_3$

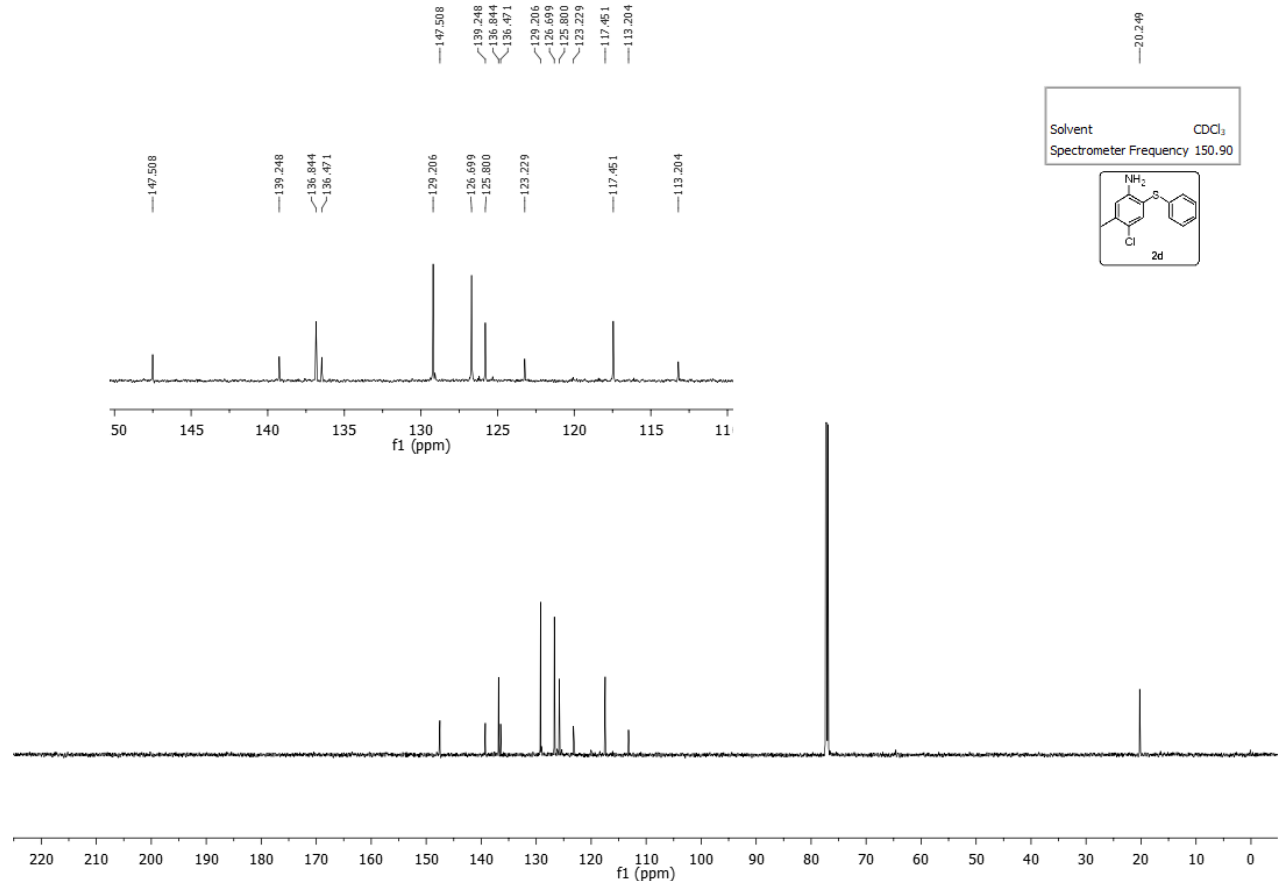

Compound 2d,  $^{13}\text{C-NMR}$ , 150MHz,  $\text{CDCl}_3$

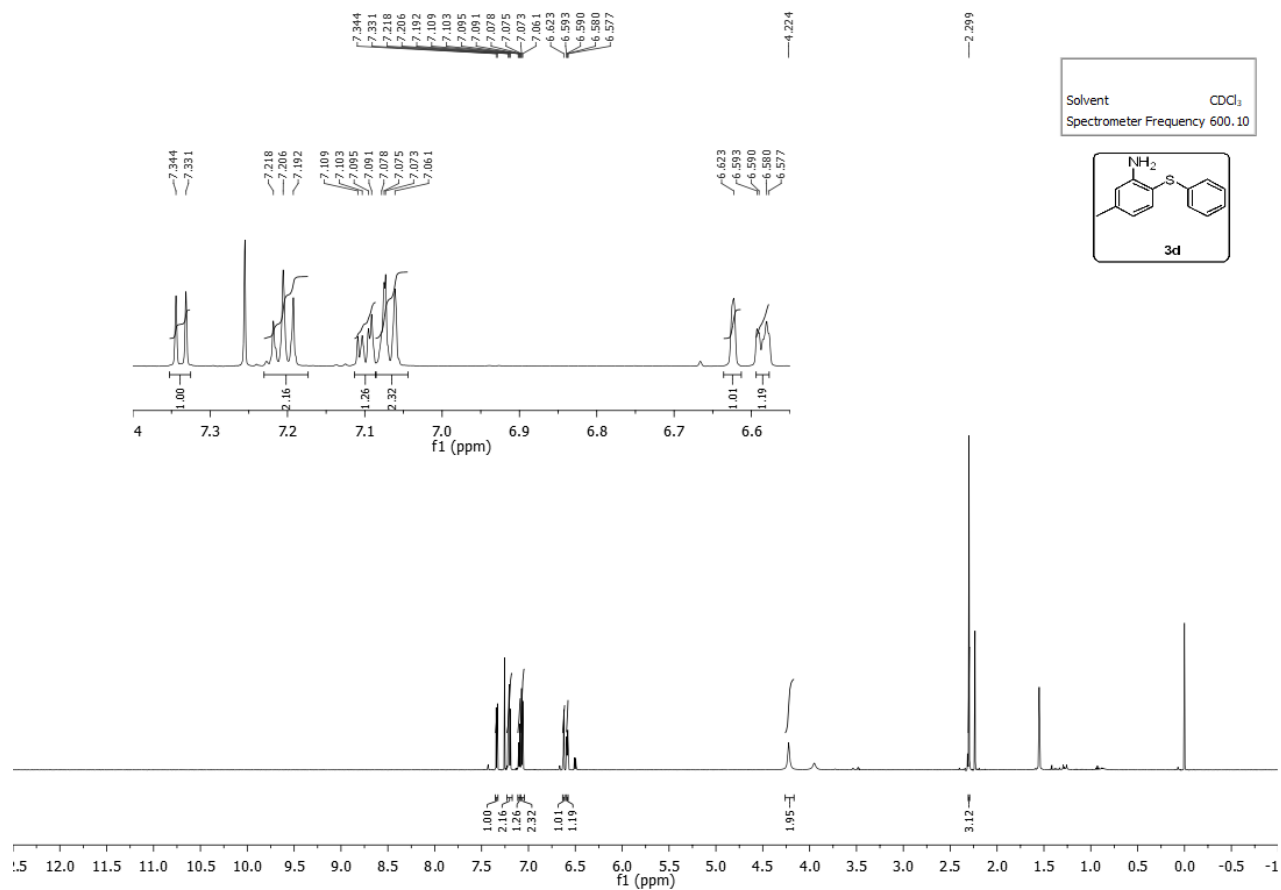

Compound **3d**,  $^1\text{H-NMR}$ , 600MHz,  $\text{CDCl}_3$

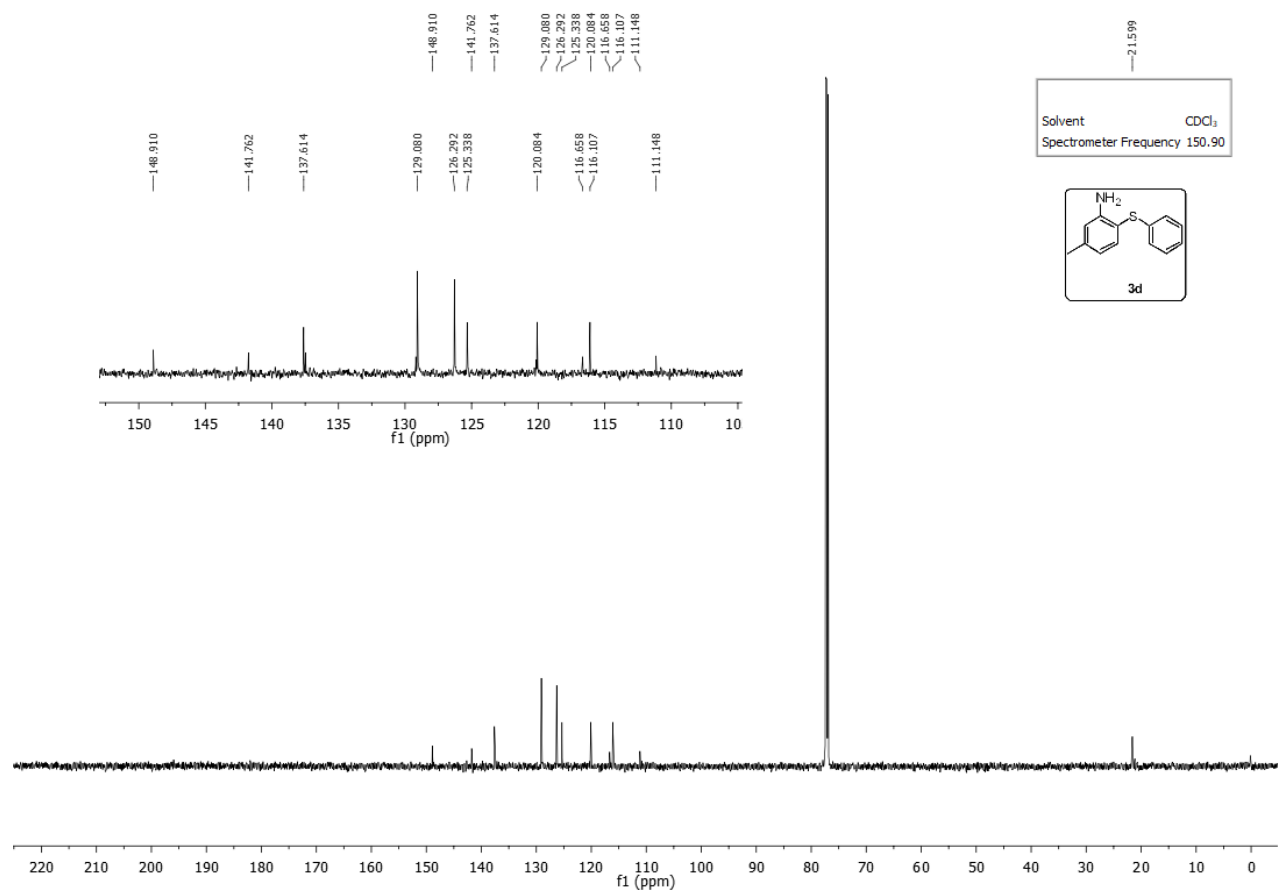

Compound **3d**,  $^{13}\text{C-NMR}$ , 150MHz,  $\text{CDCl}_3$

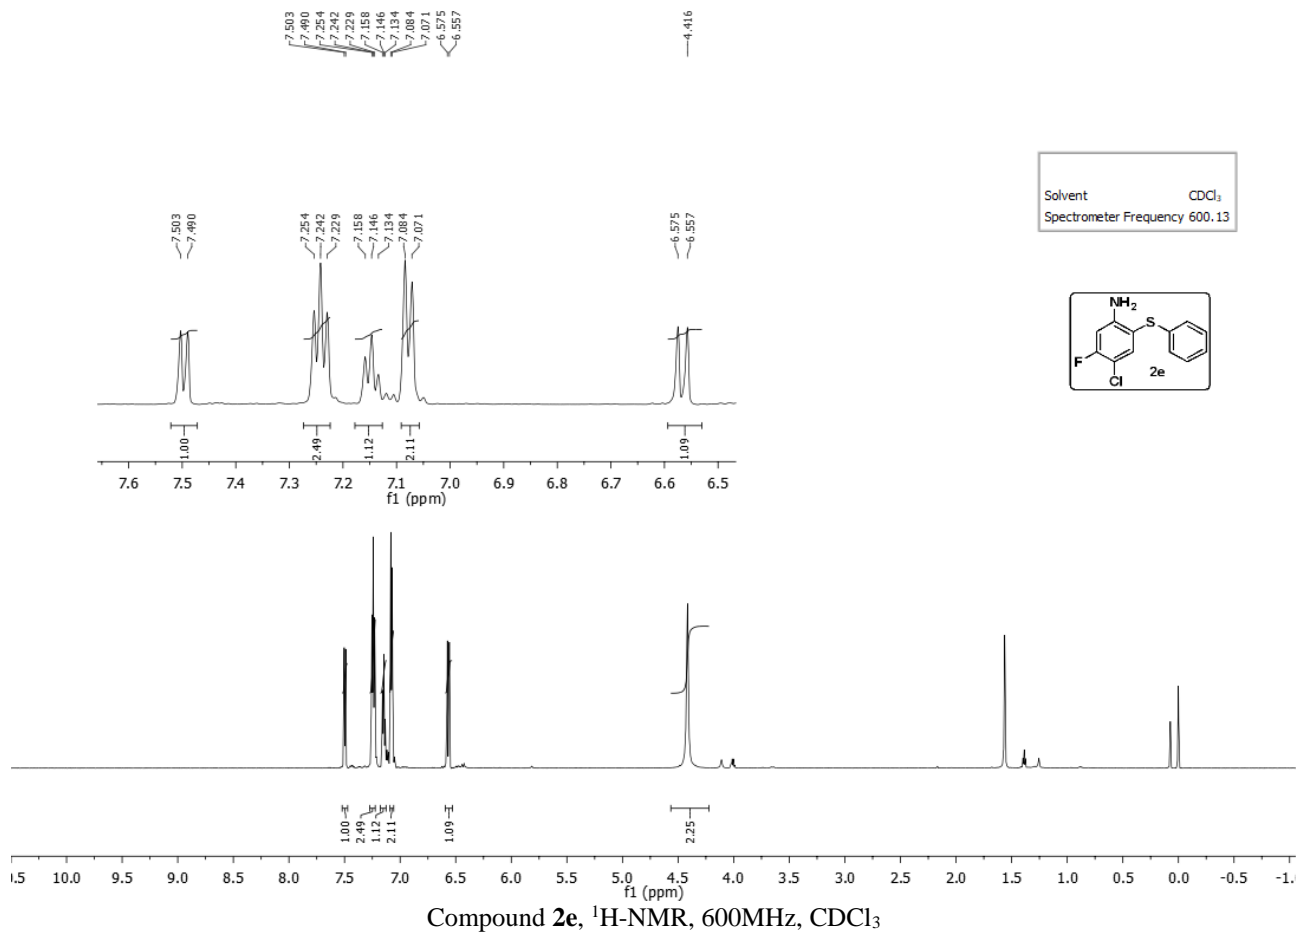

Compound 2e,  $^1\text{H-NMR}$ , 600MHz,  $\text{CDCl}_3$

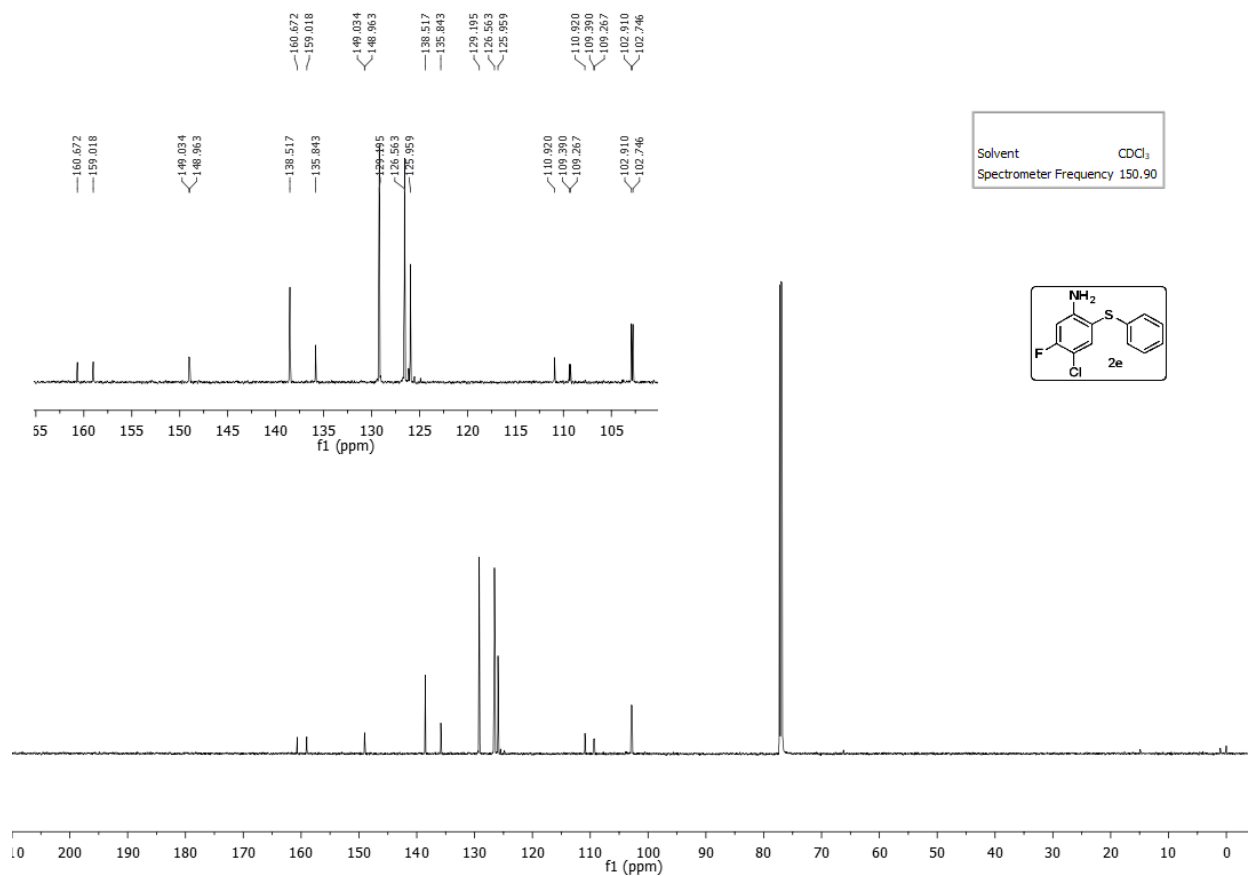

Compound 2e,  $^{13}\text{C-NMR}$ , 150MHz,  $\text{CDCl}_3$

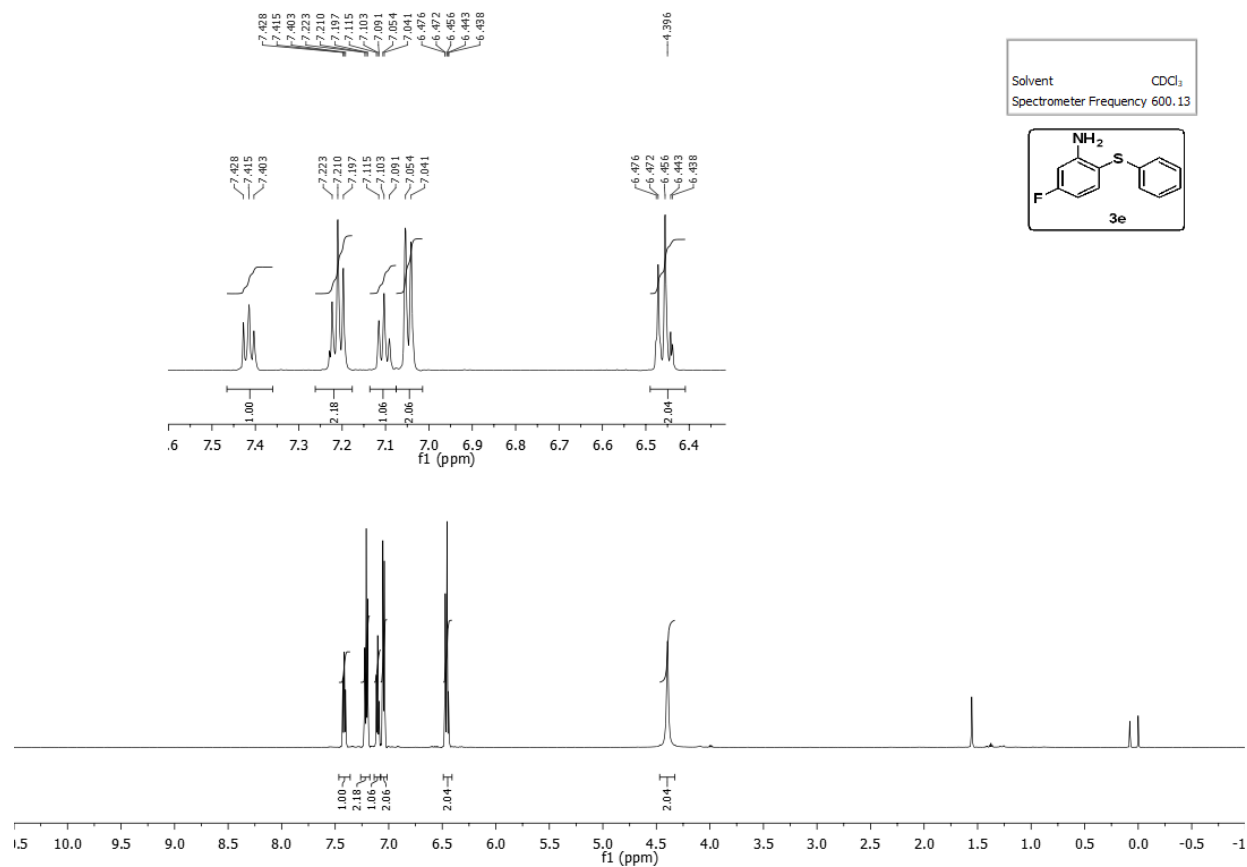

Compound 3e,  $^1\text{H-NMR}$ , 600MHz,  $\text{CDCl}_3$

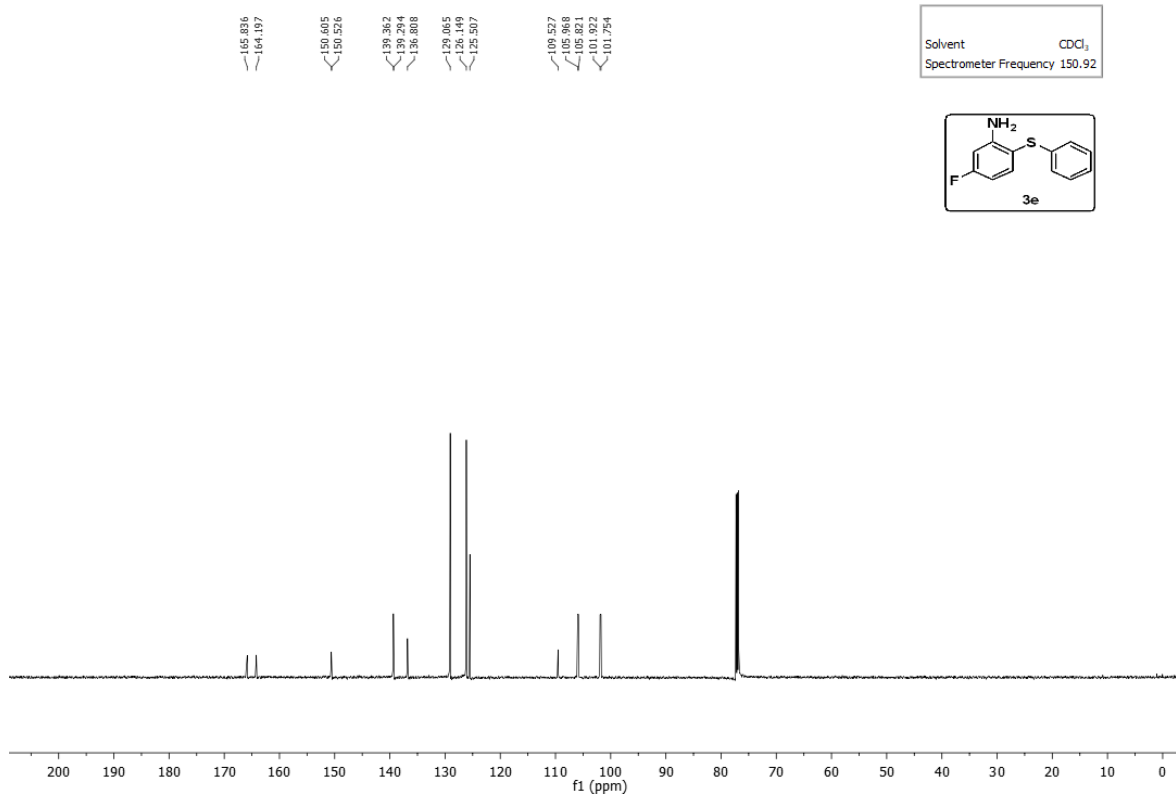

Compound 3e,  $^{13}\text{C-NMR}$ , 150MHz,  $\text{CDCl}_3$

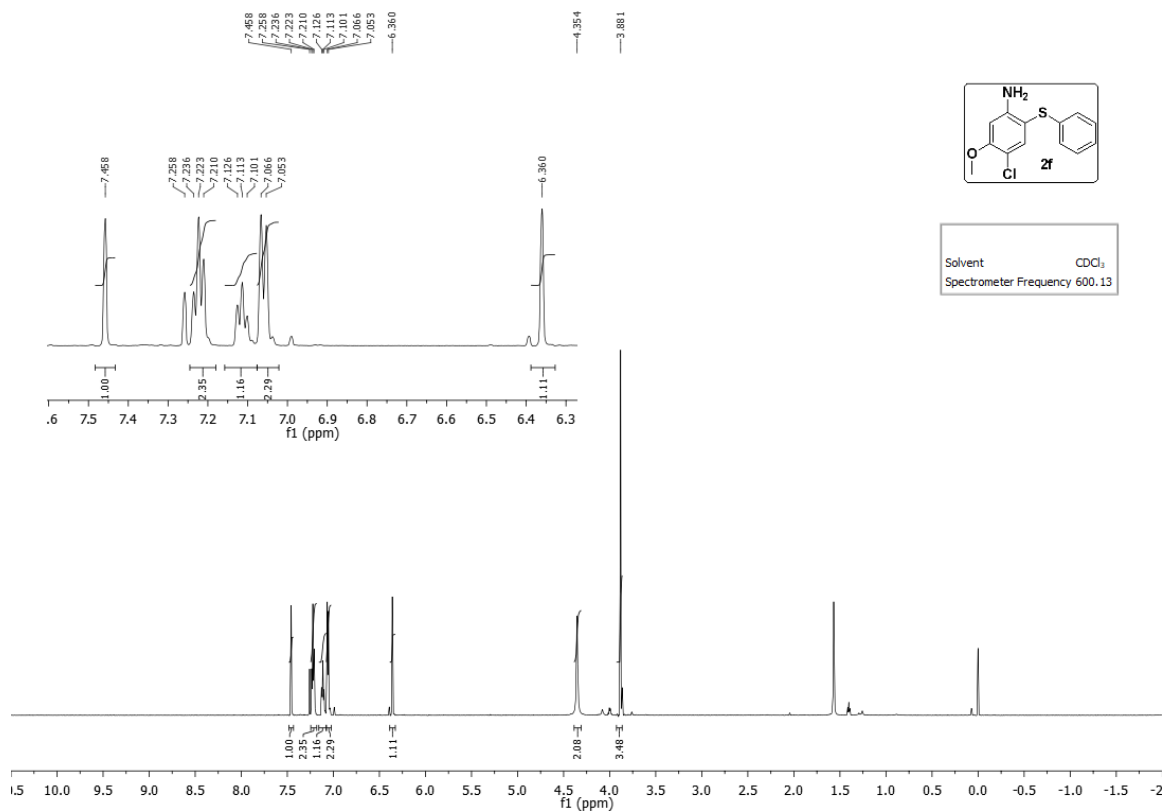

Compound **2f**,  $^1\text{H-NMR}$ , 600MHz,  $\text{CDCl}_3$

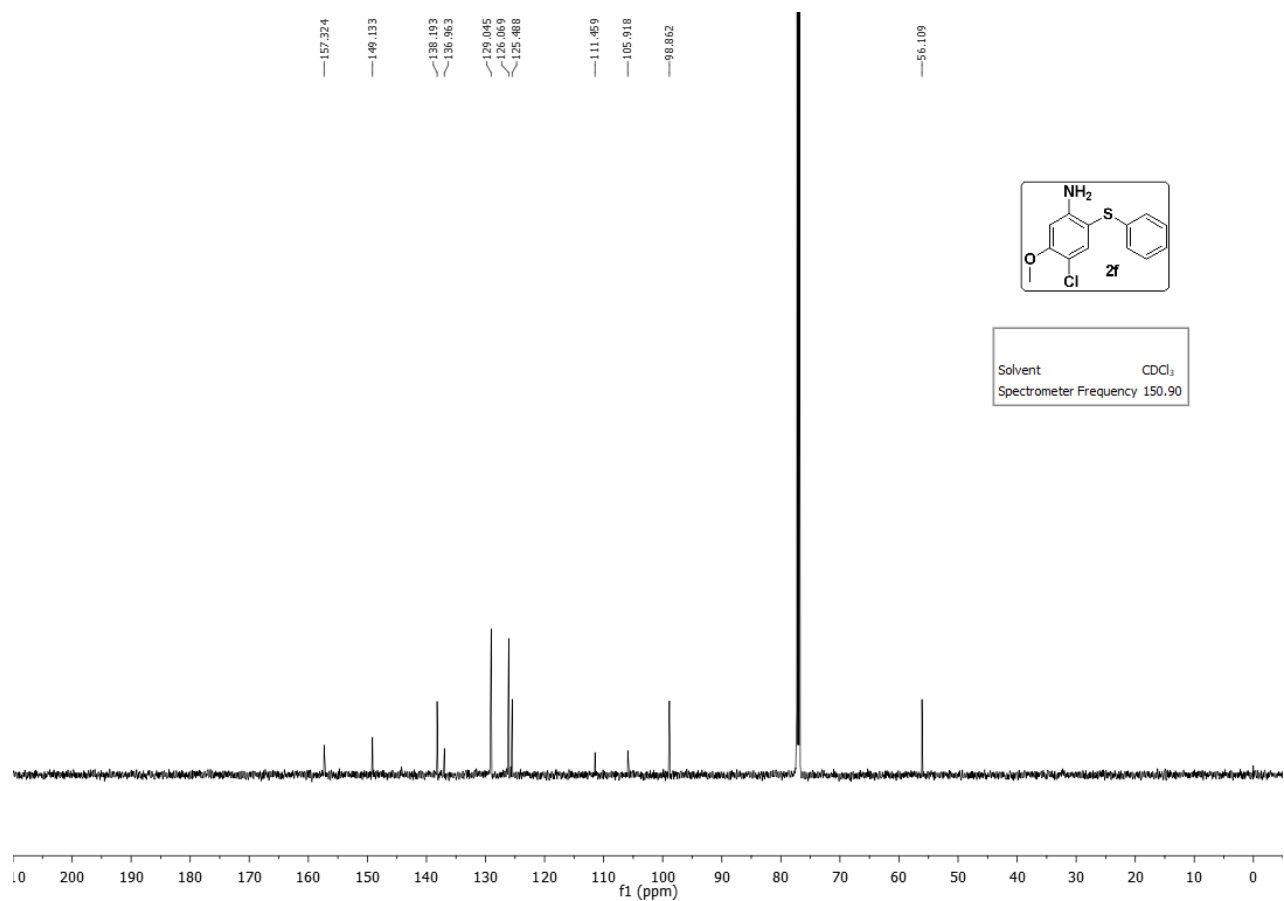

Compound **2f**,  $^{13}\text{C-NMR}$ , 150MHz,  $\text{CDCl}_3$

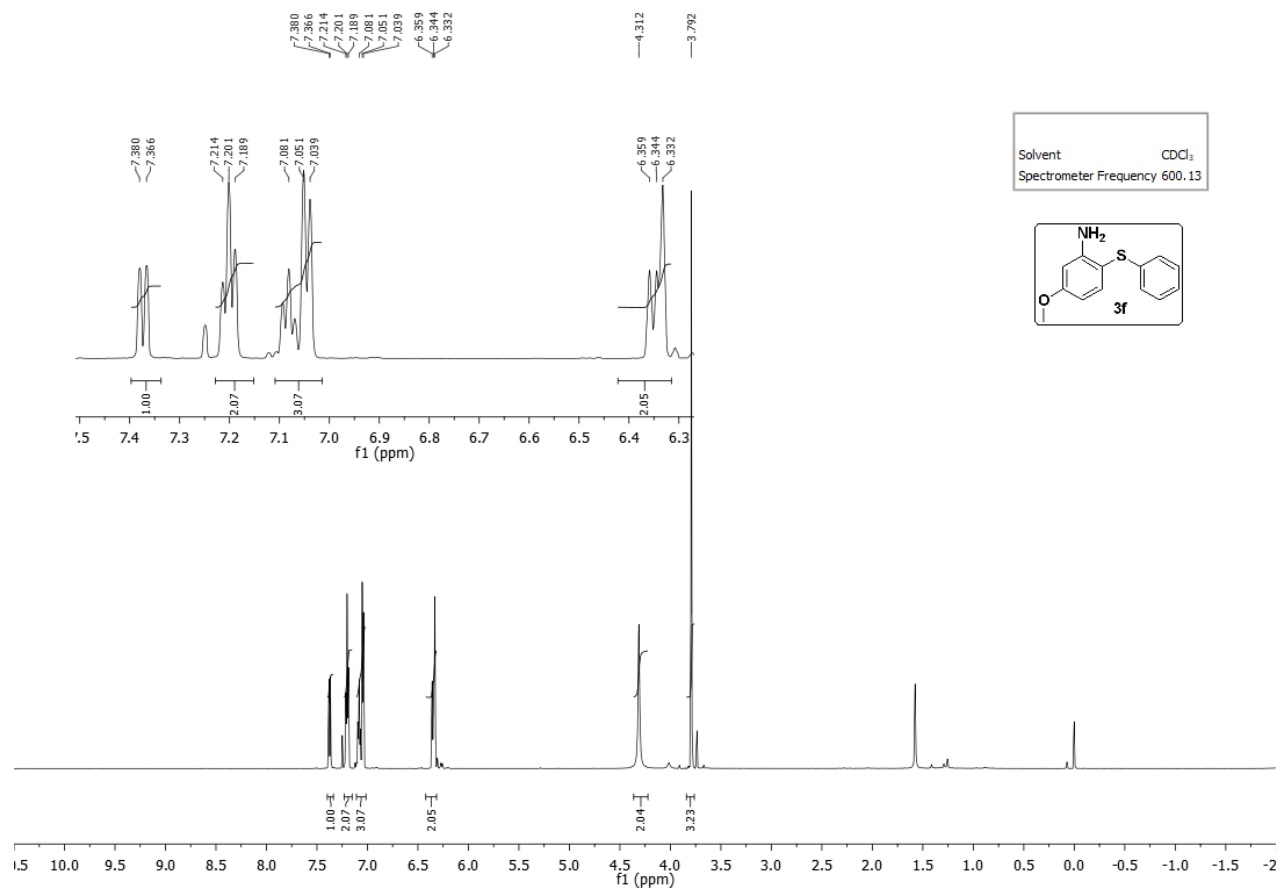

Compound **3f**,  $^1\text{H-NMR}$ , 600MHz,  $\text{CDCl}_3$

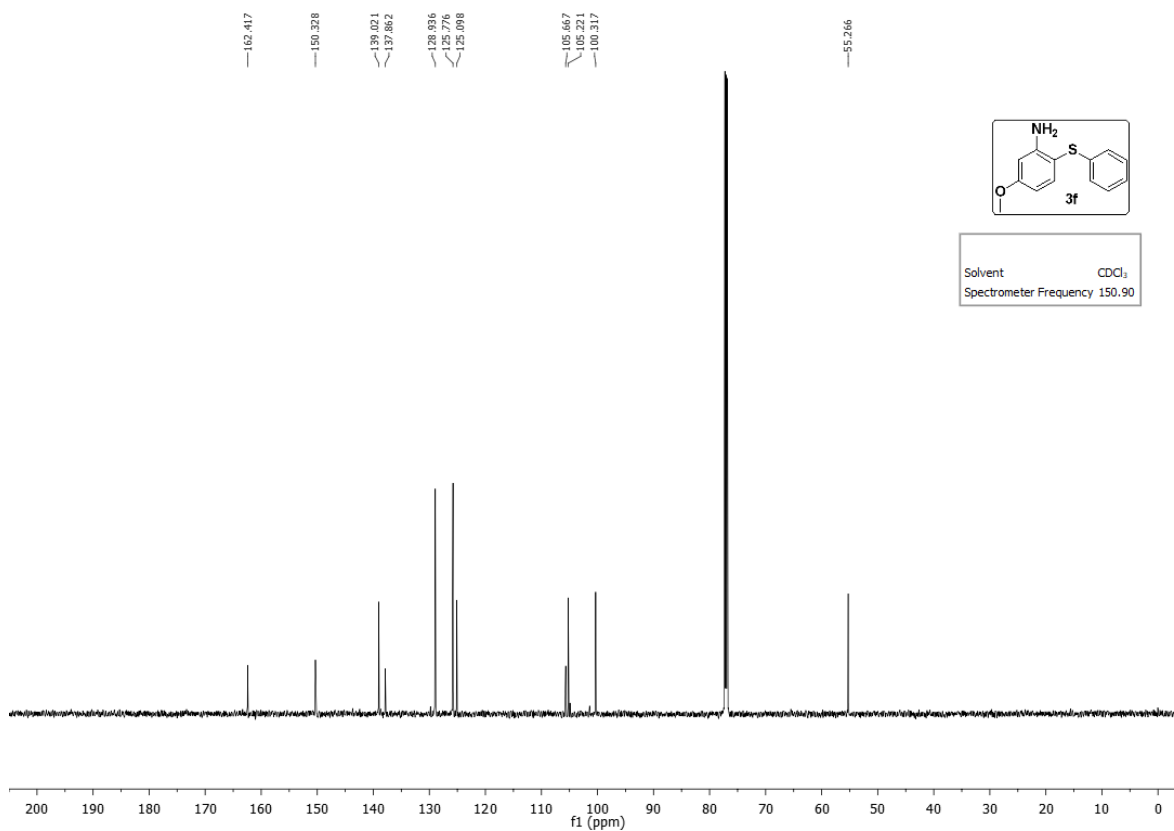

Compound **3f**,  $^{13}\text{C-NMR}$ , 150MHz,  $\text{CDCl}_3$



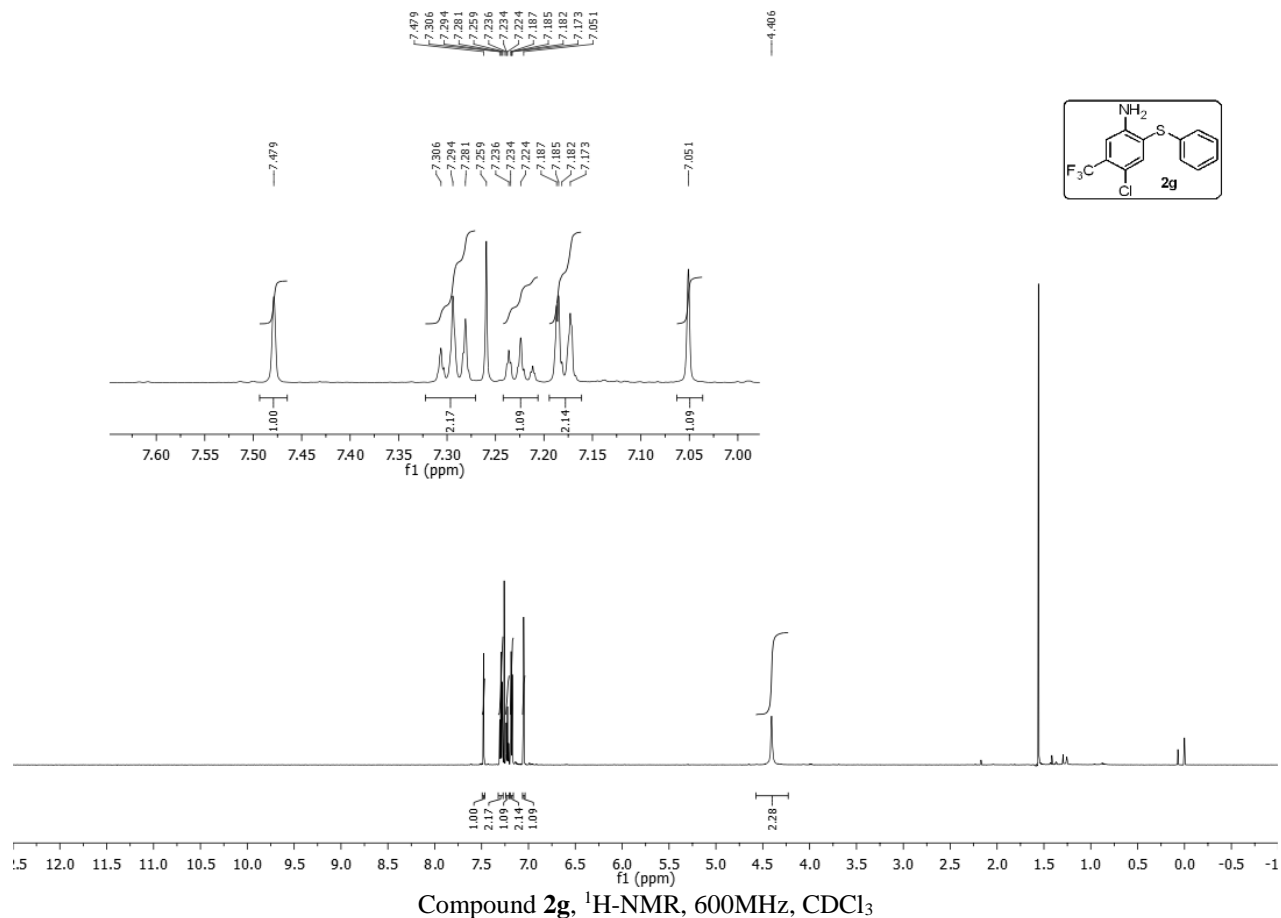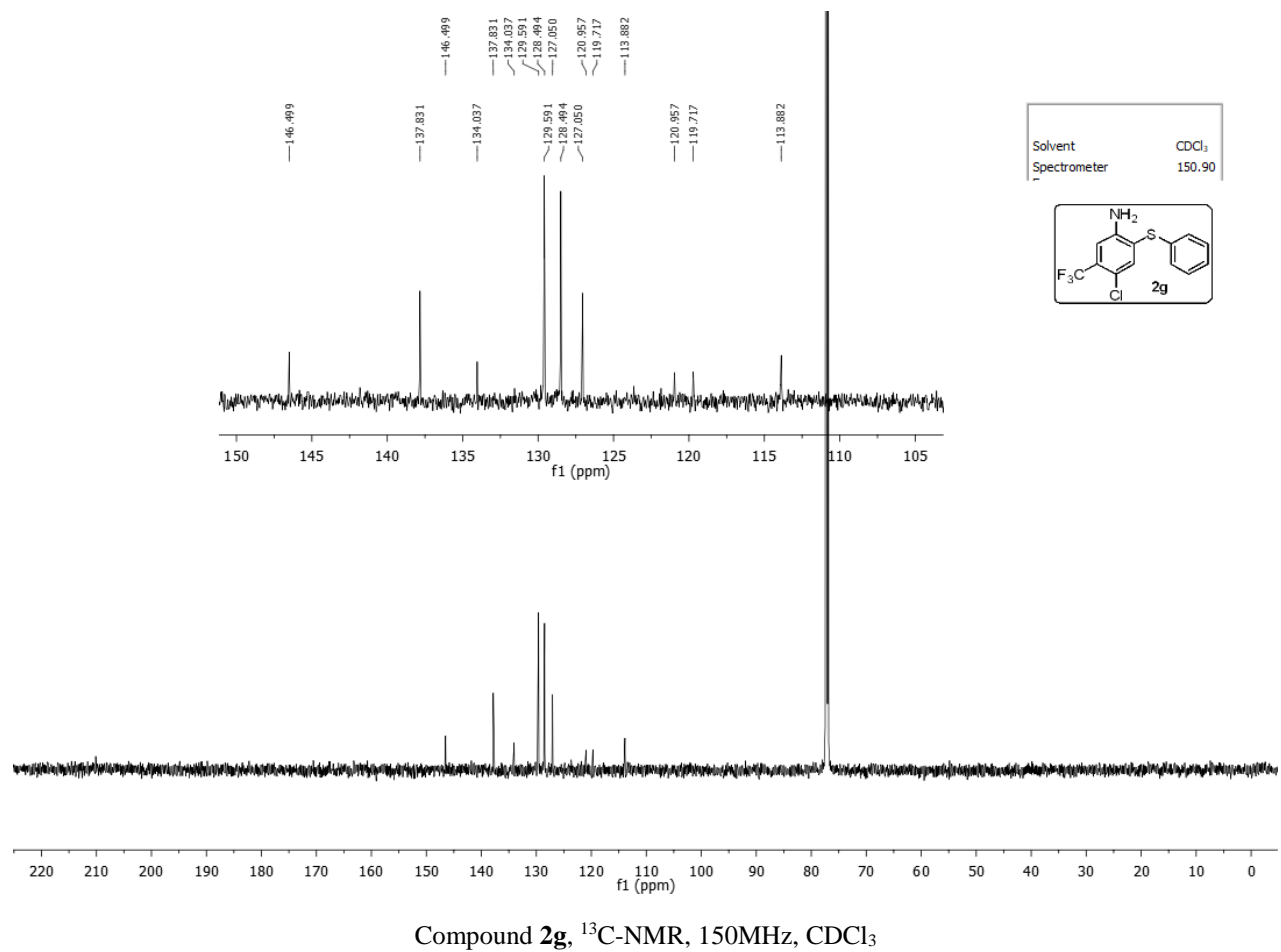



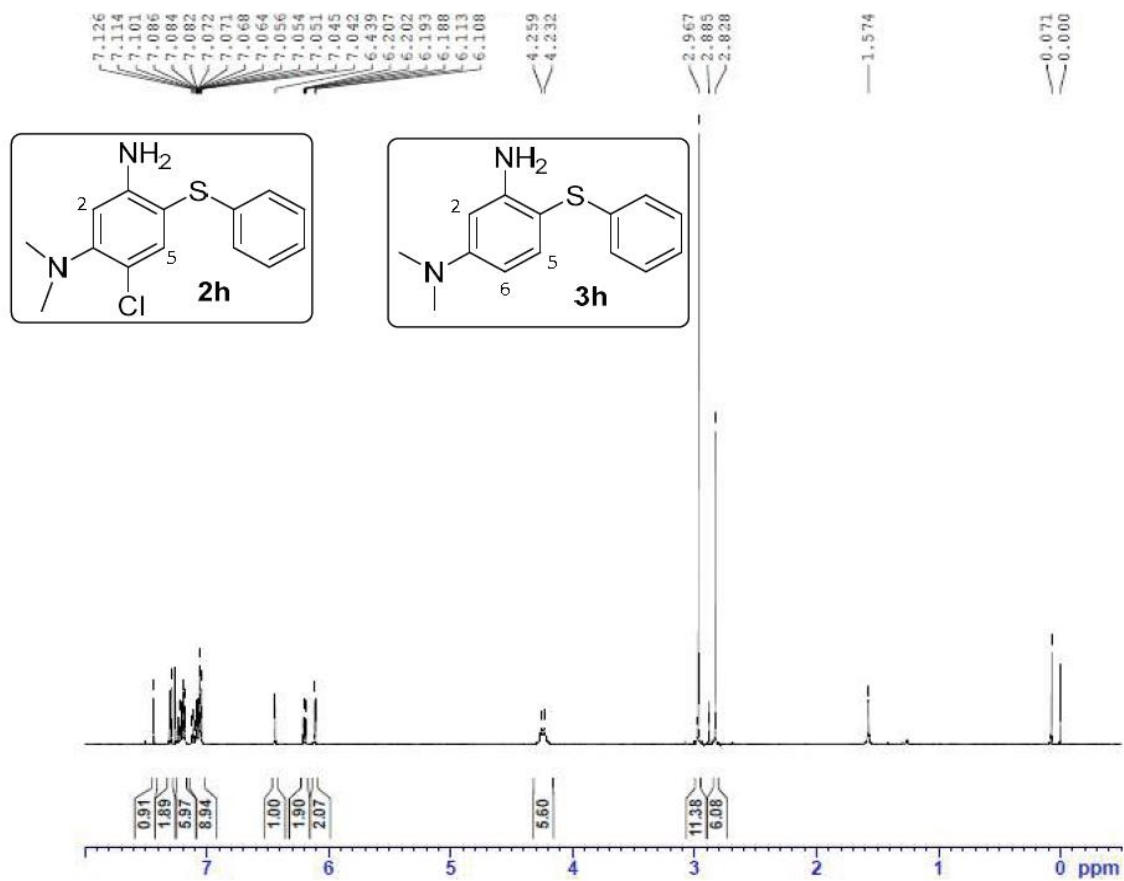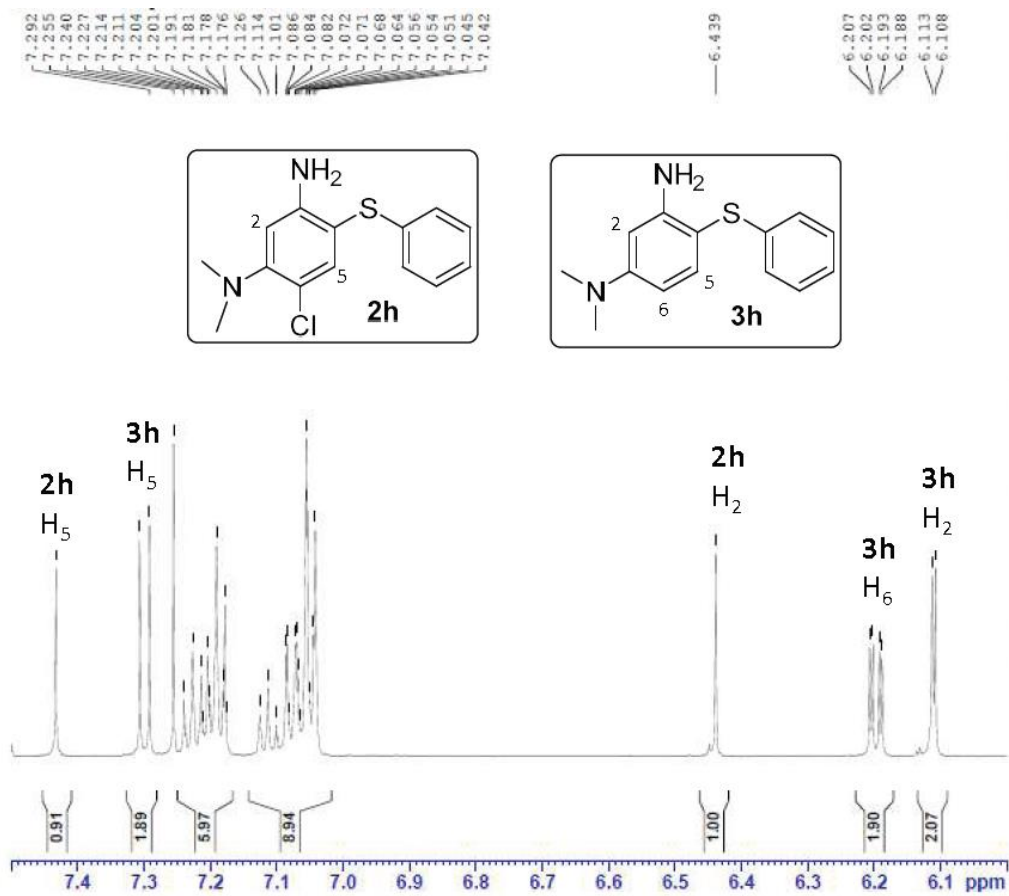

A mixture of compounds **2h** and **3h** (ratio=1:2), <sup>1</sup>H-NMR, 600MHz, CDCl<sub>3</sub>

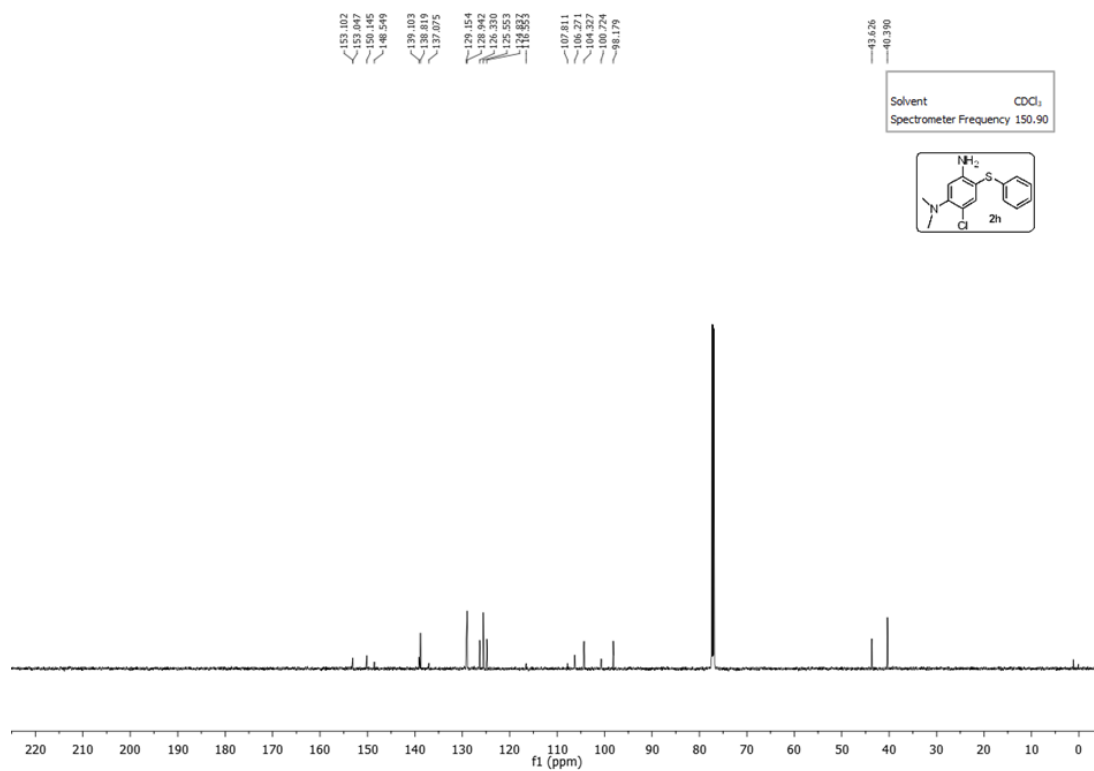

A mixture of compounds **2h** and **3h** (ratio=1:2),  $^{13}\text{C}$ -NMR, 150MHz,  $\text{CDCl}_3$

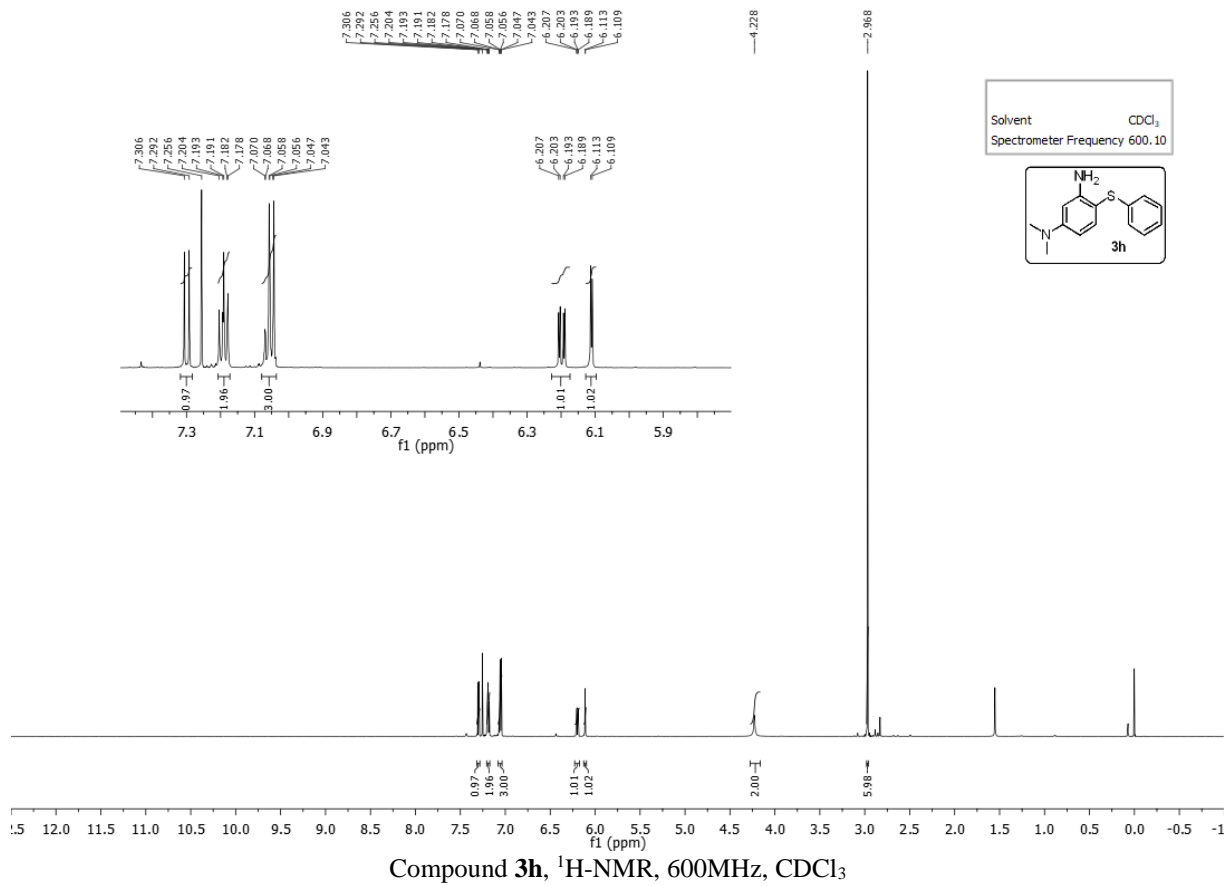

Compound **3h**, <sup>1</sup>H-NMR, 600MHz, CDCl<sub>3</sub>

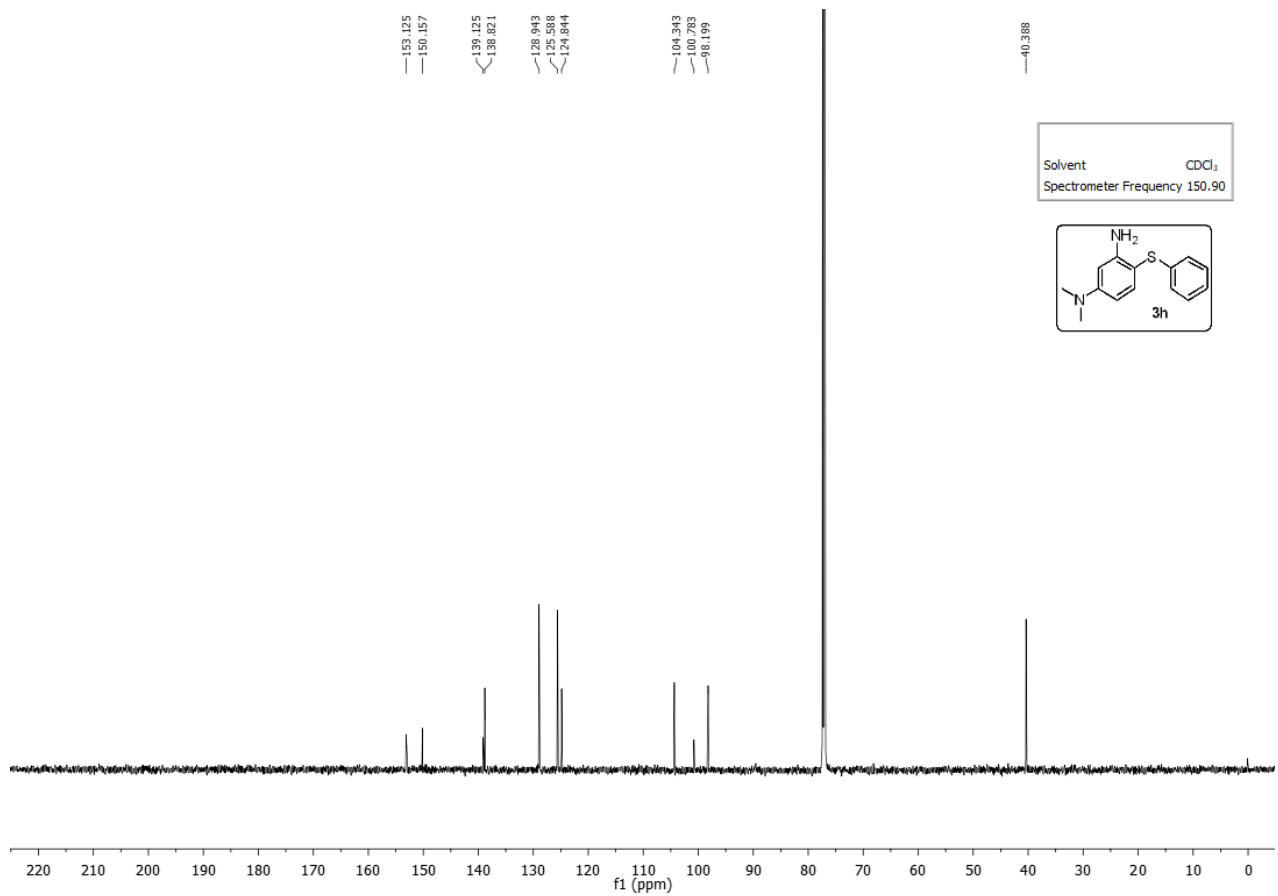

Compound **3h**, <sup>13</sup>C-NMR, 150MHz, CDCl<sub>3</sub>

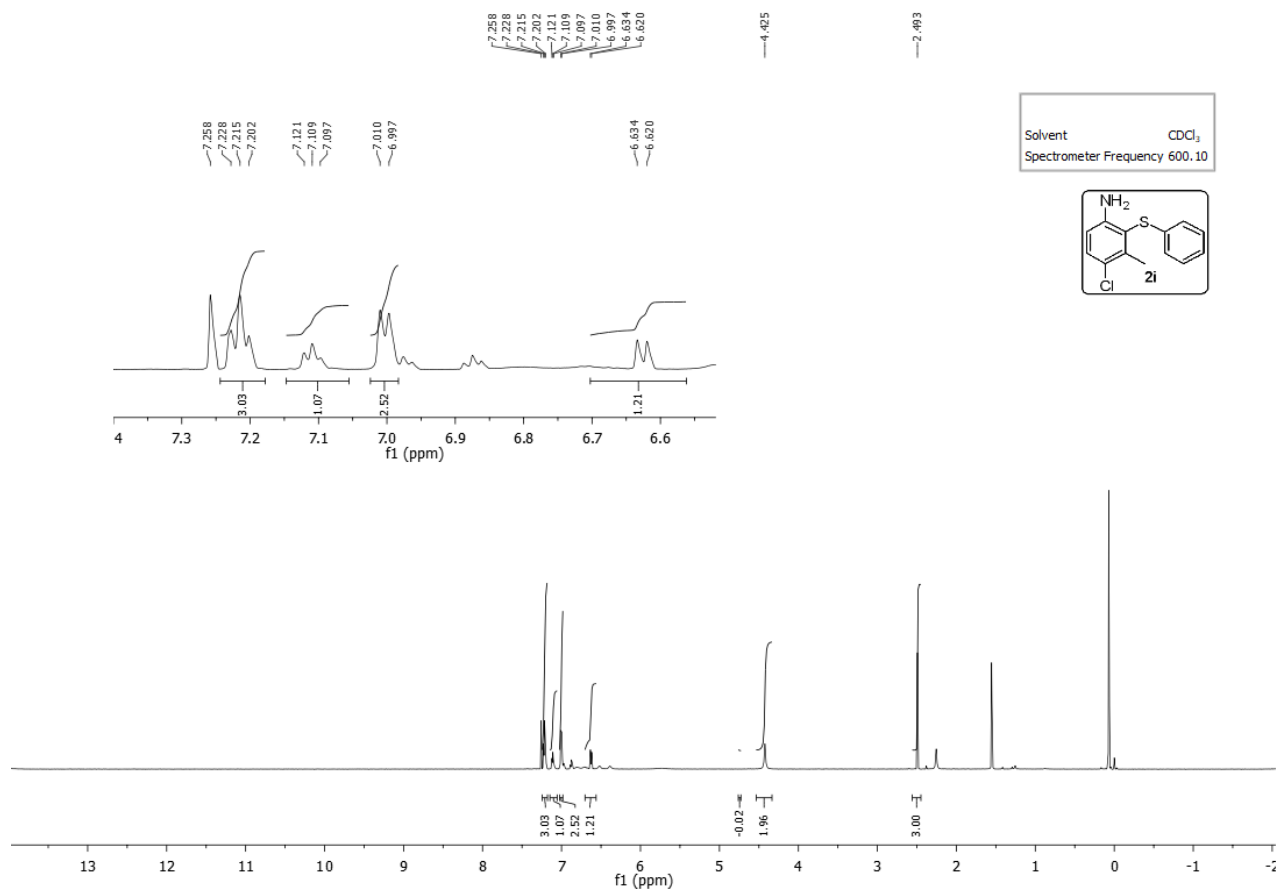

Compound **2i**,  $^1\text{H-NMR}$ , 600MHz,  $\text{CDCl}_3$

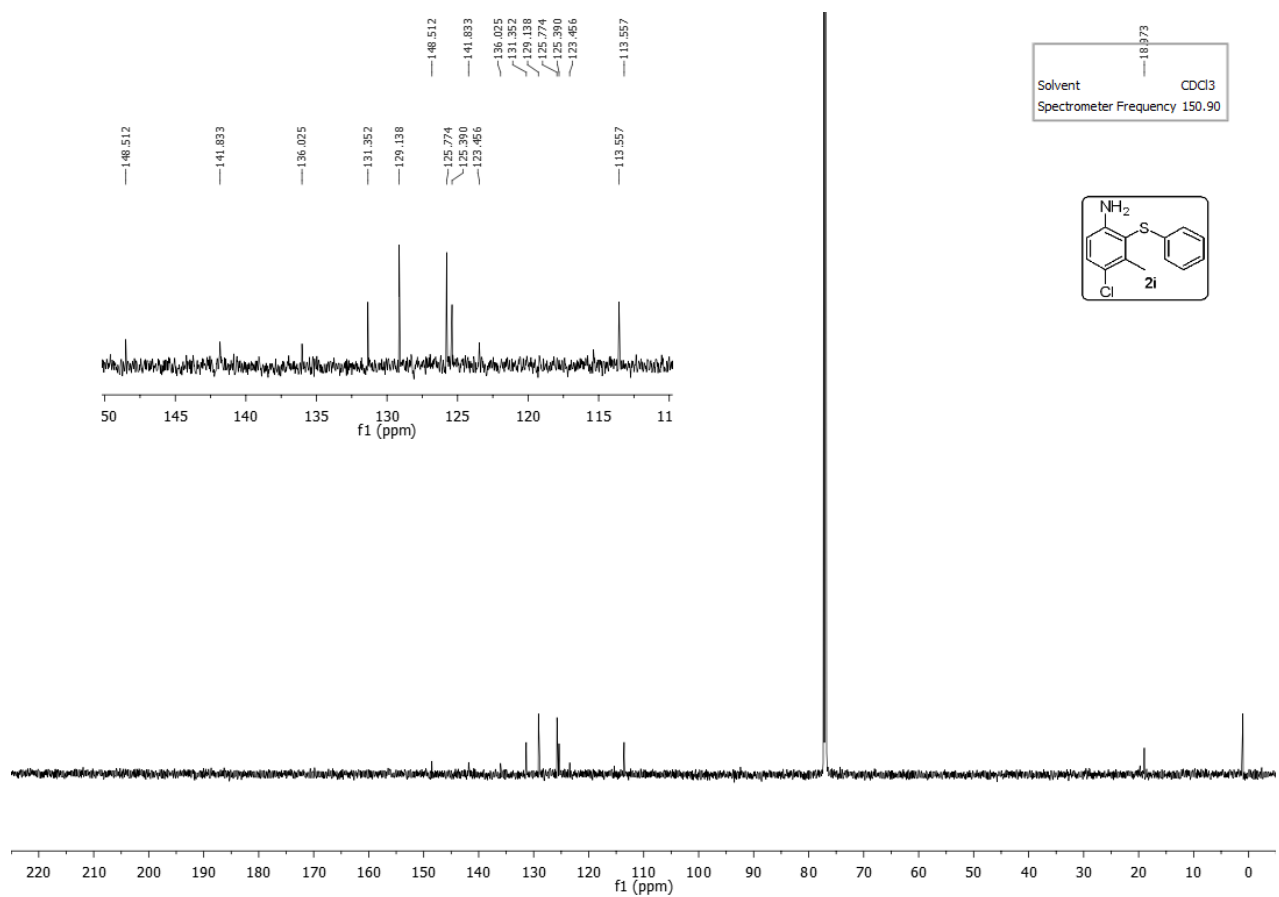

Compound **2i**,  $^{13}\text{C-NMR}$ , 150MHz,  $\text{CDCl}_3$

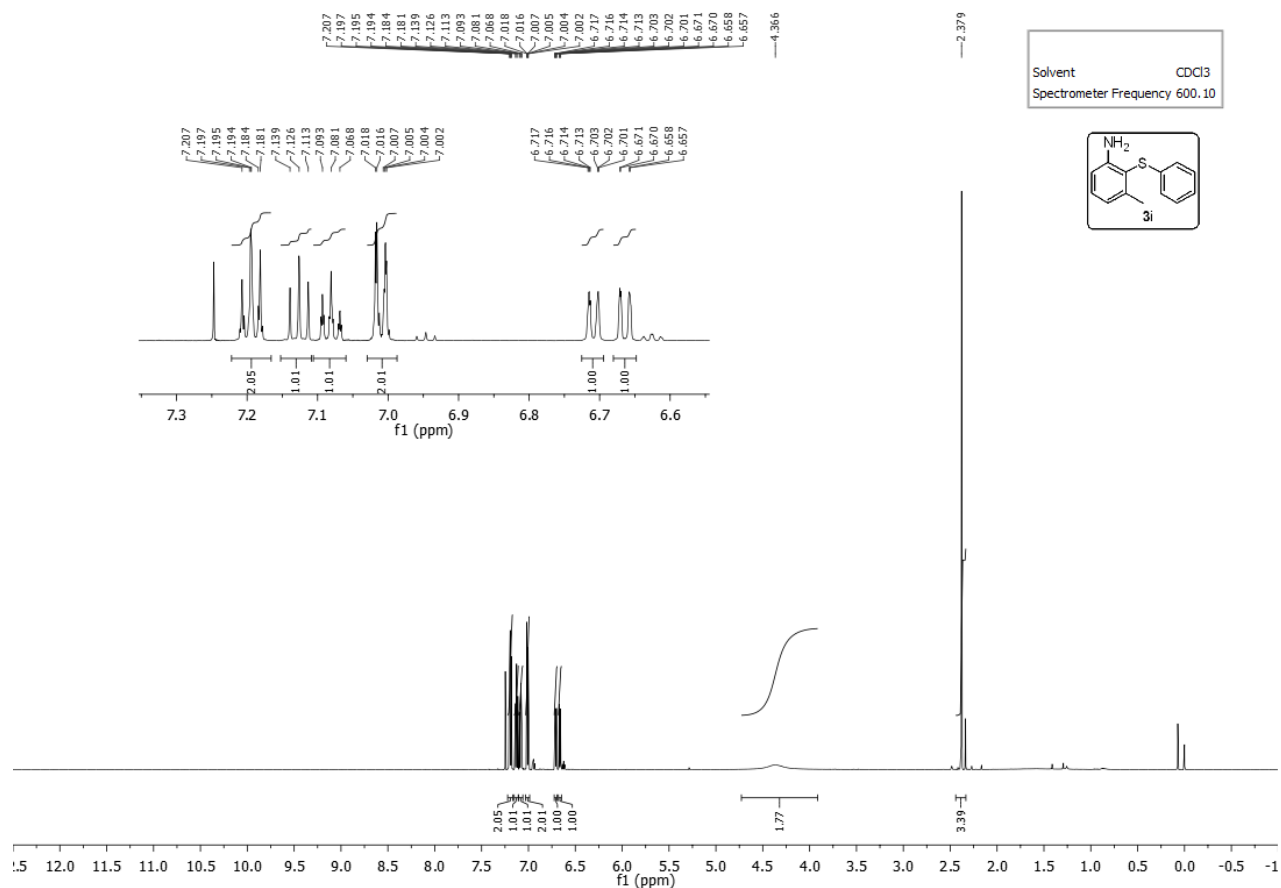

Compound **3i**, <sup>1</sup>H-NMR, 600MHz, CDCl<sub>3</sub>

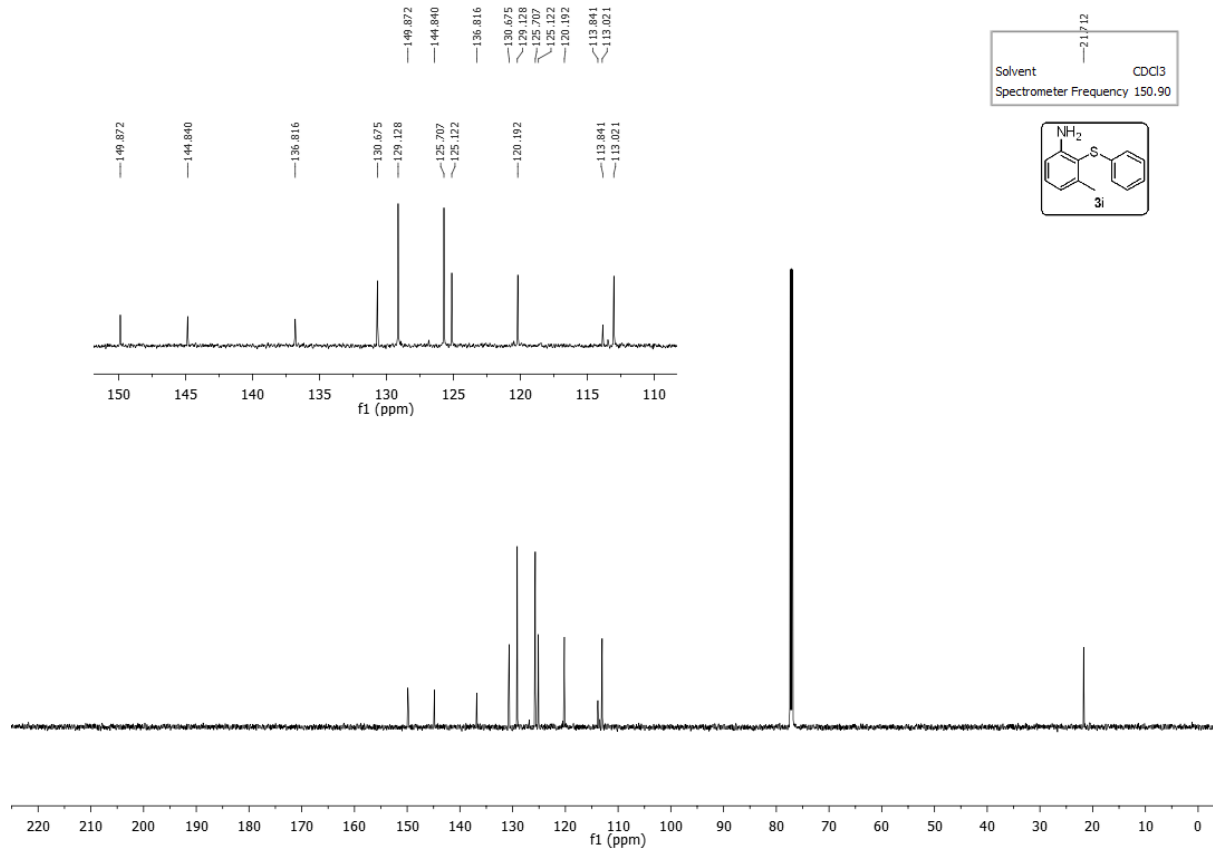

Compound **3i**, <sup>13</sup>C-NMR, 150MHz, CDCl<sub>3</sub>

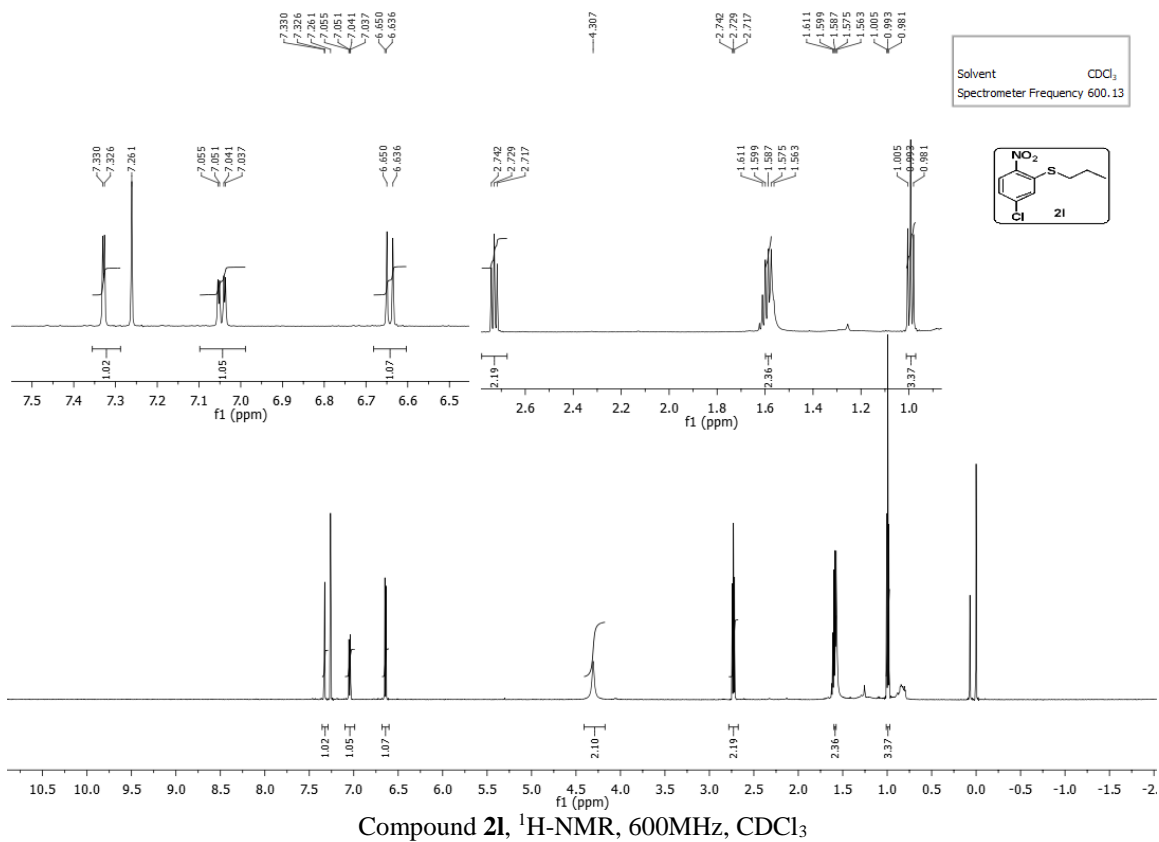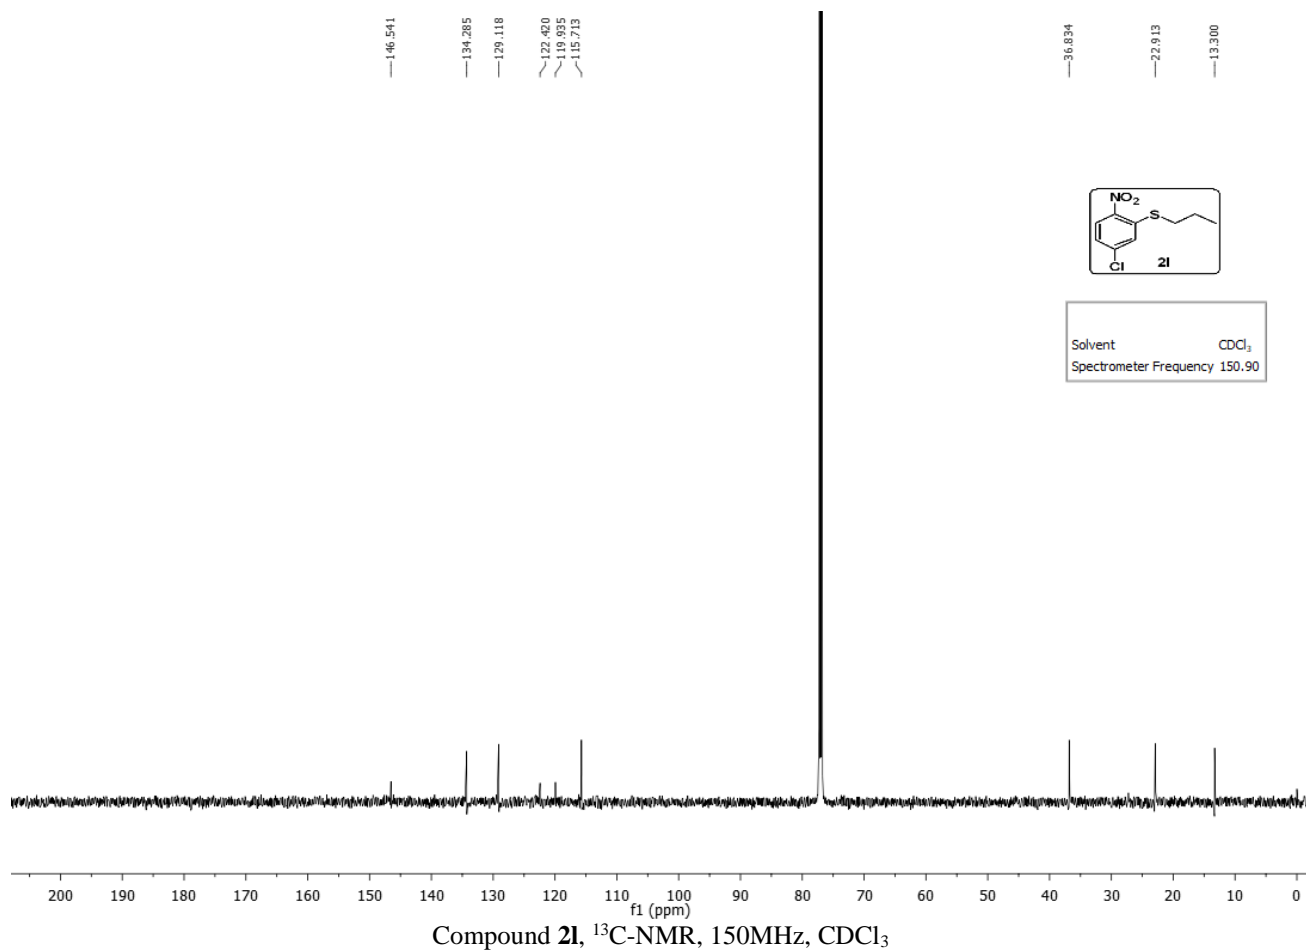



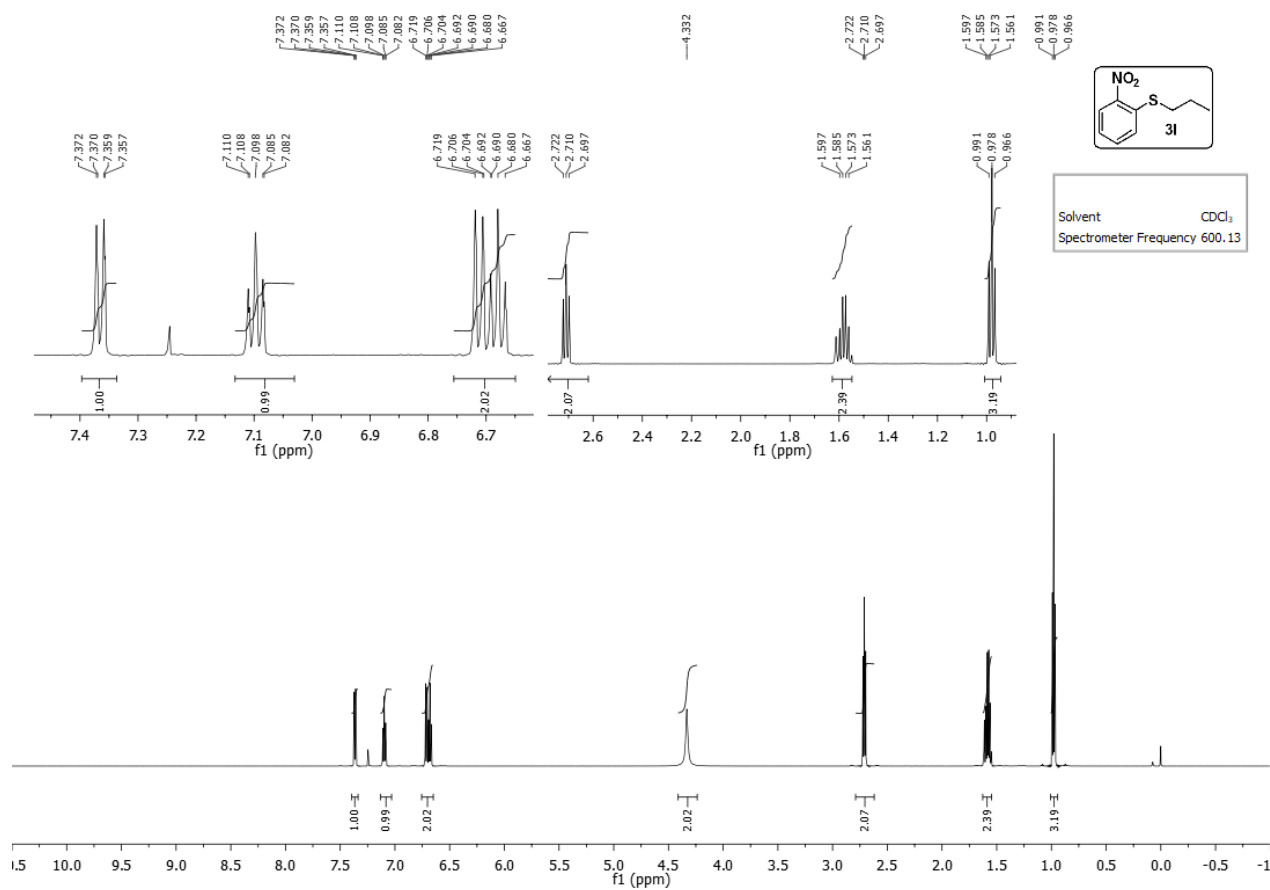

Compound 31,  $^1\text{H-NMR}$ , 600MHz,  $\text{CDCl}_3$

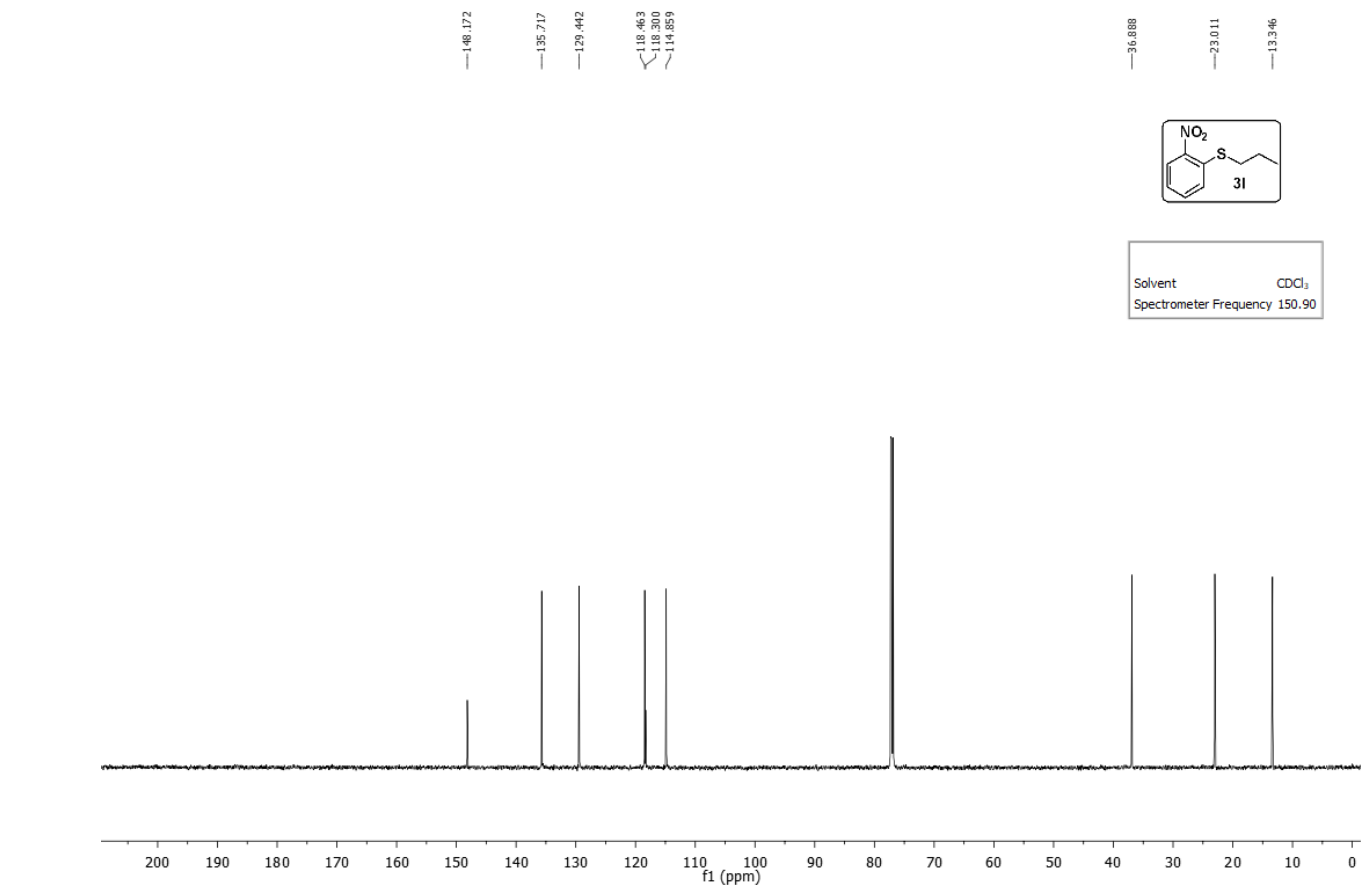

Compound 31,  $^{13}\text{C-NMR}$ , 150MHz,  $\text{CDCl}_3$

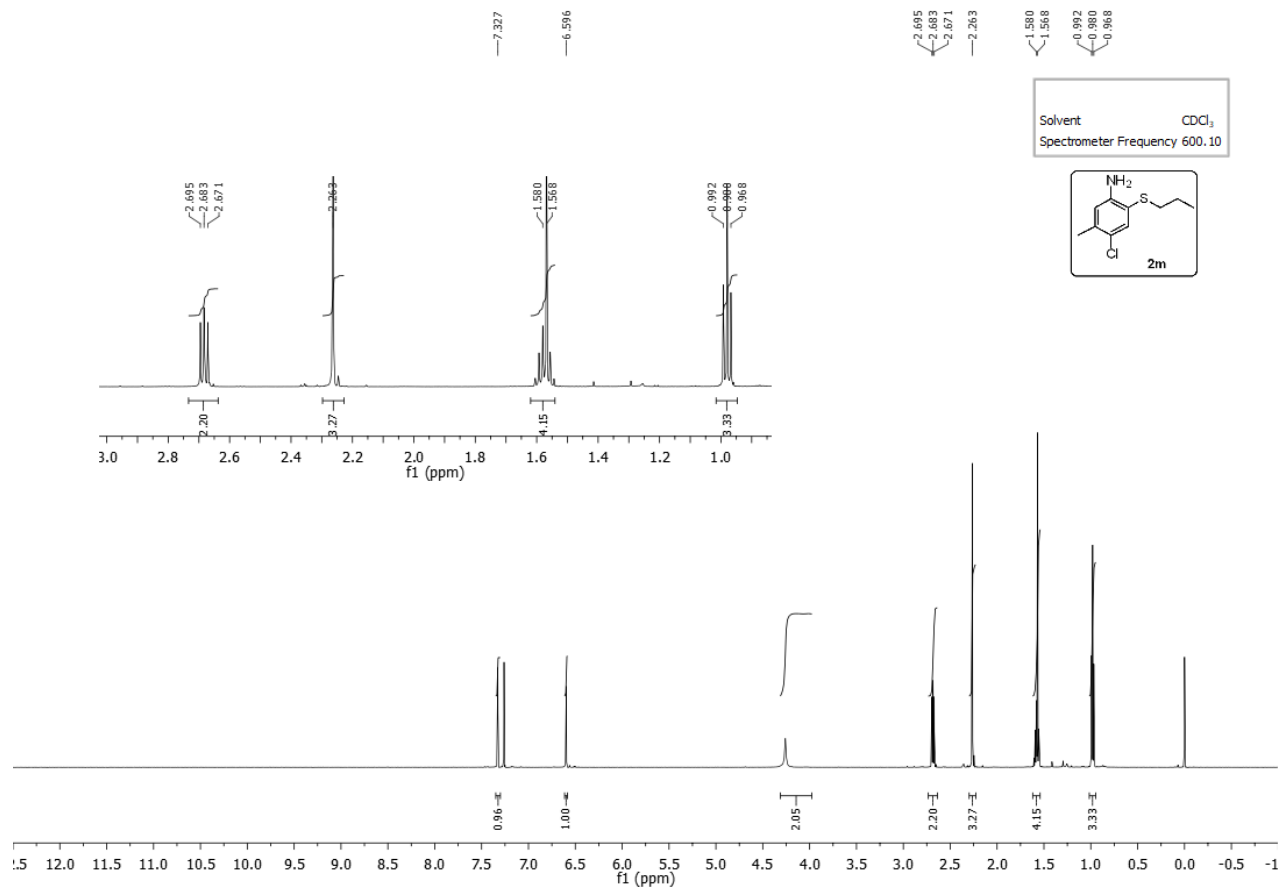

Compound **2m**,  $^1\text{H-NMR}$ , 600MHz,  $\text{CDCl}_3$

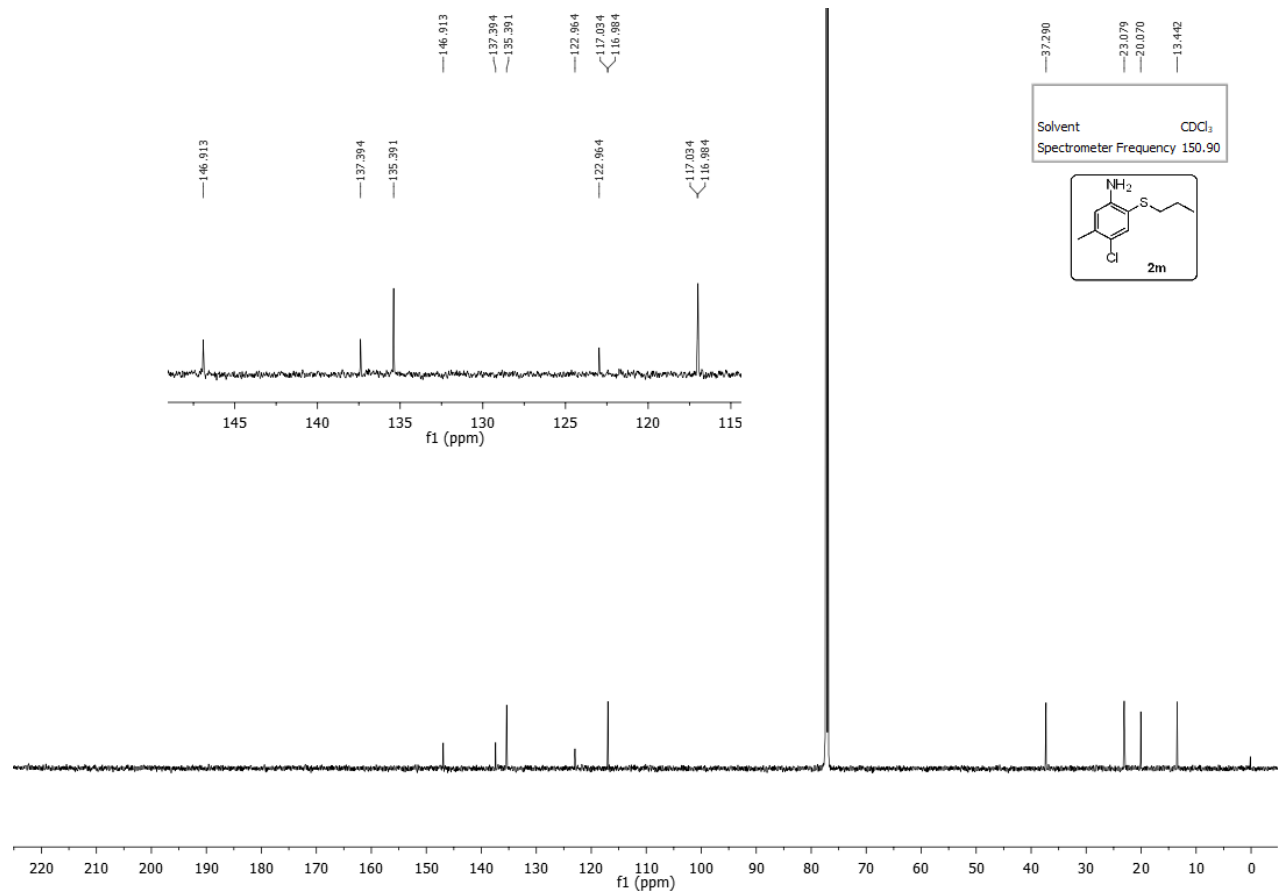

Compound **2m**,  $^{13}\text{C-NMR}$ , 150MHz,  $\text{CDCl}_3$

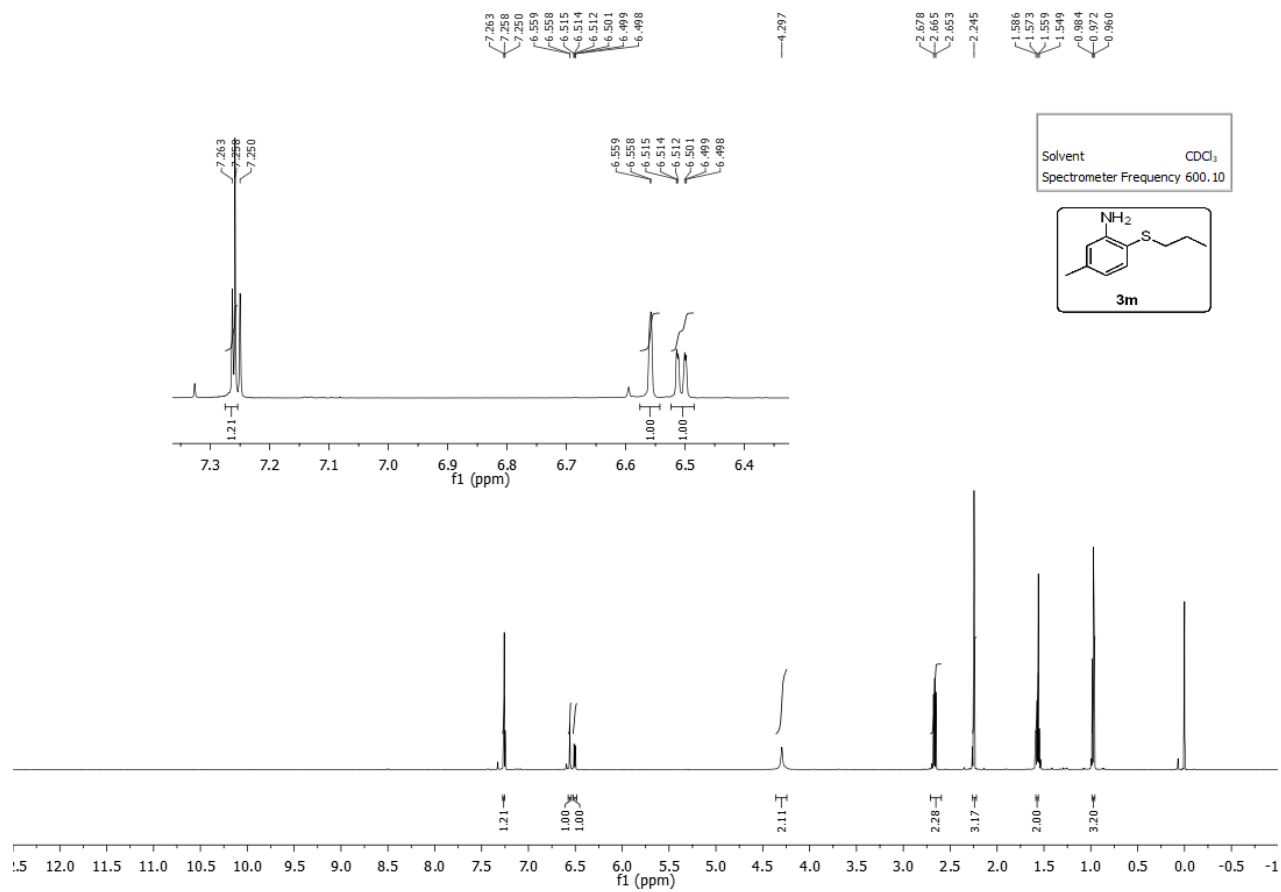

Compound **3m**,  $^1\text{H-NMR}$ , 600MHz,  $\text{CDCl}_3$

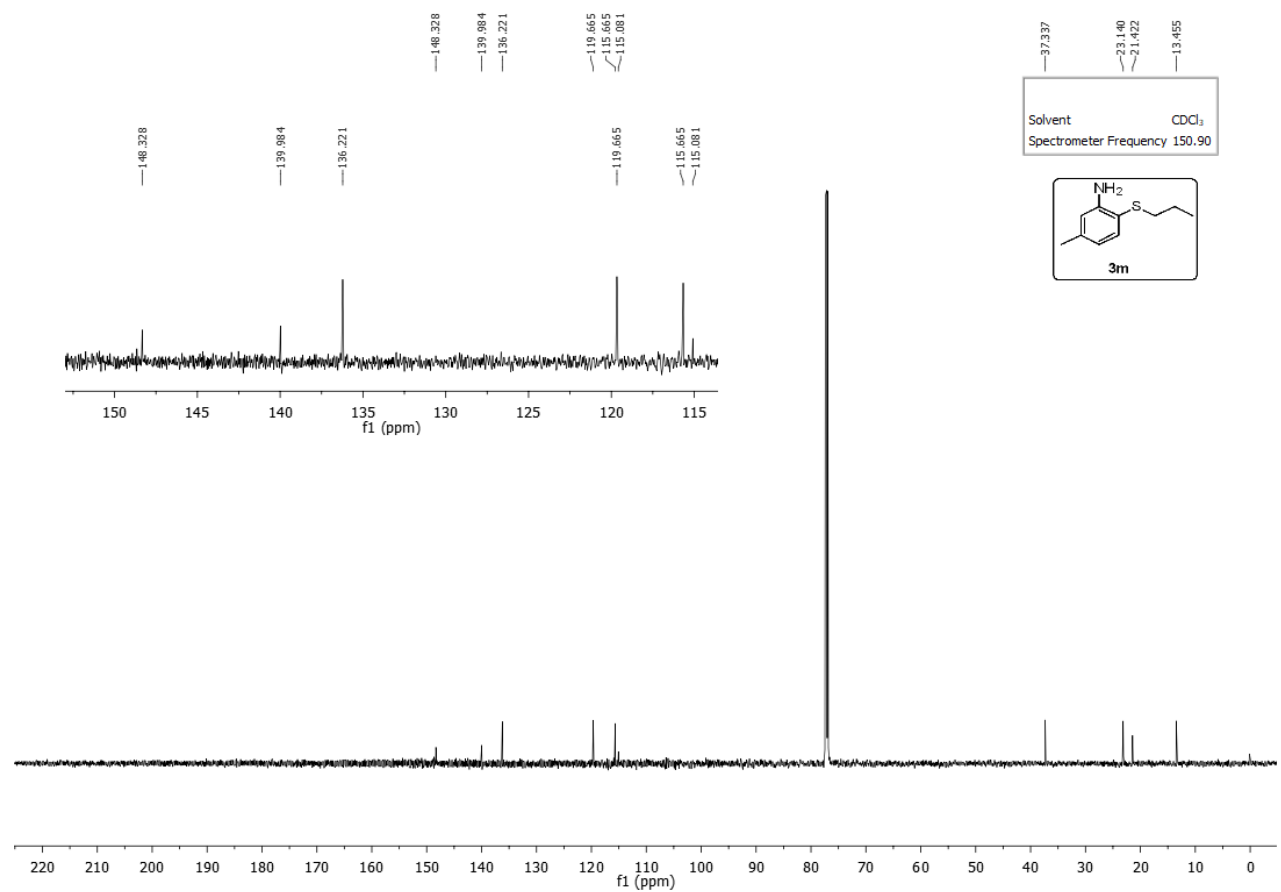

Compound **3m**,  $^{13}\text{C-NMR}$ , 150MHz,  $\text{CDCl}_3$

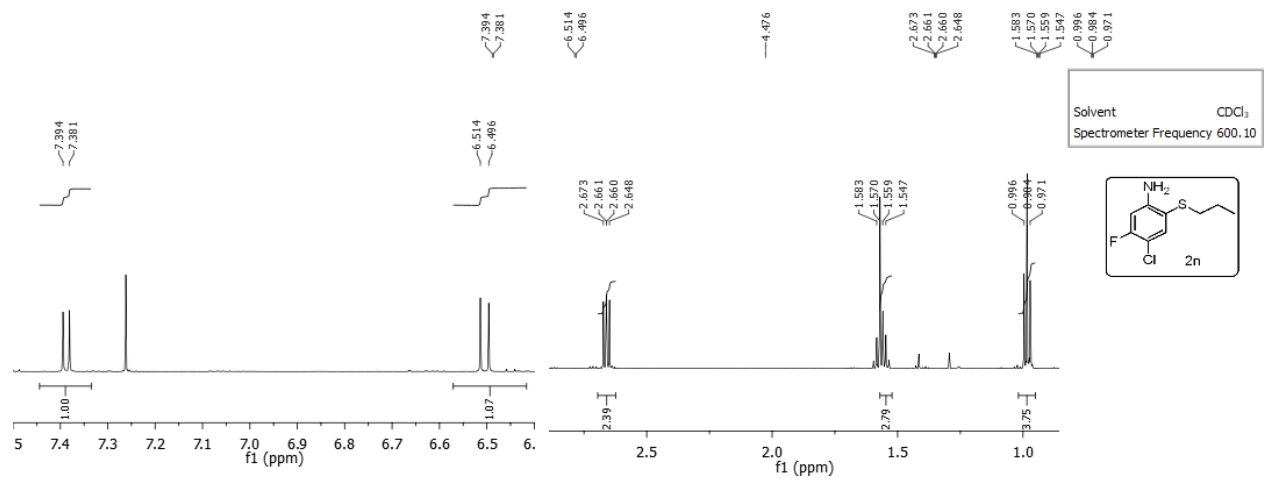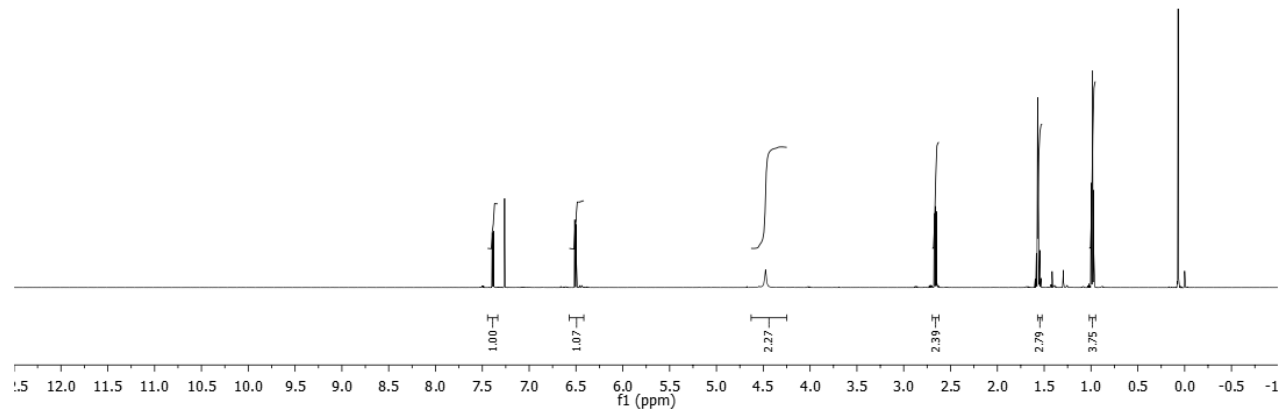

Compound **2n**,  $^1\text{H-NMR}$ , 600MHz,  $\text{CDCl}_3$

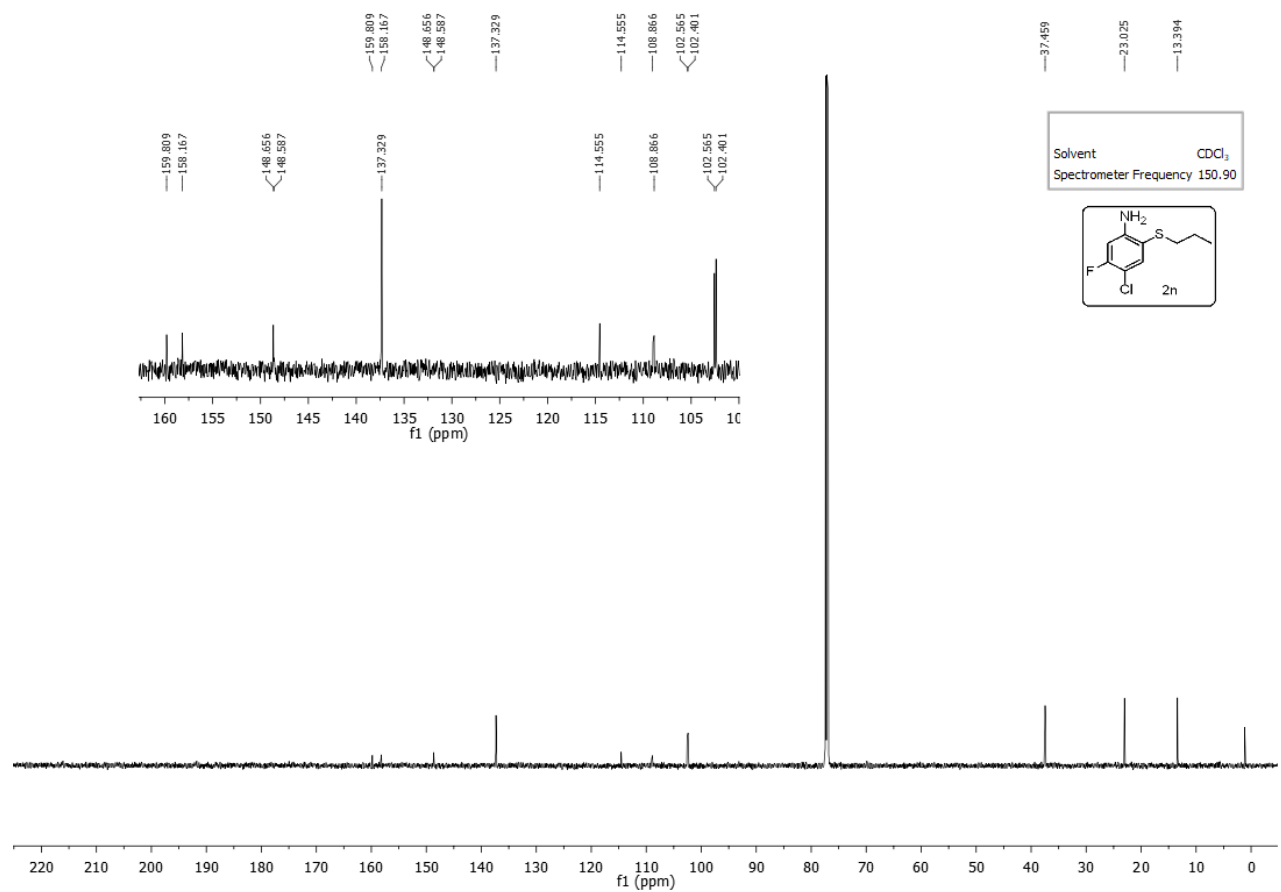

Compound **2n**,  $^{13}\text{C-NMR}$ , 150MHz,  $\text{CDCl}_3$

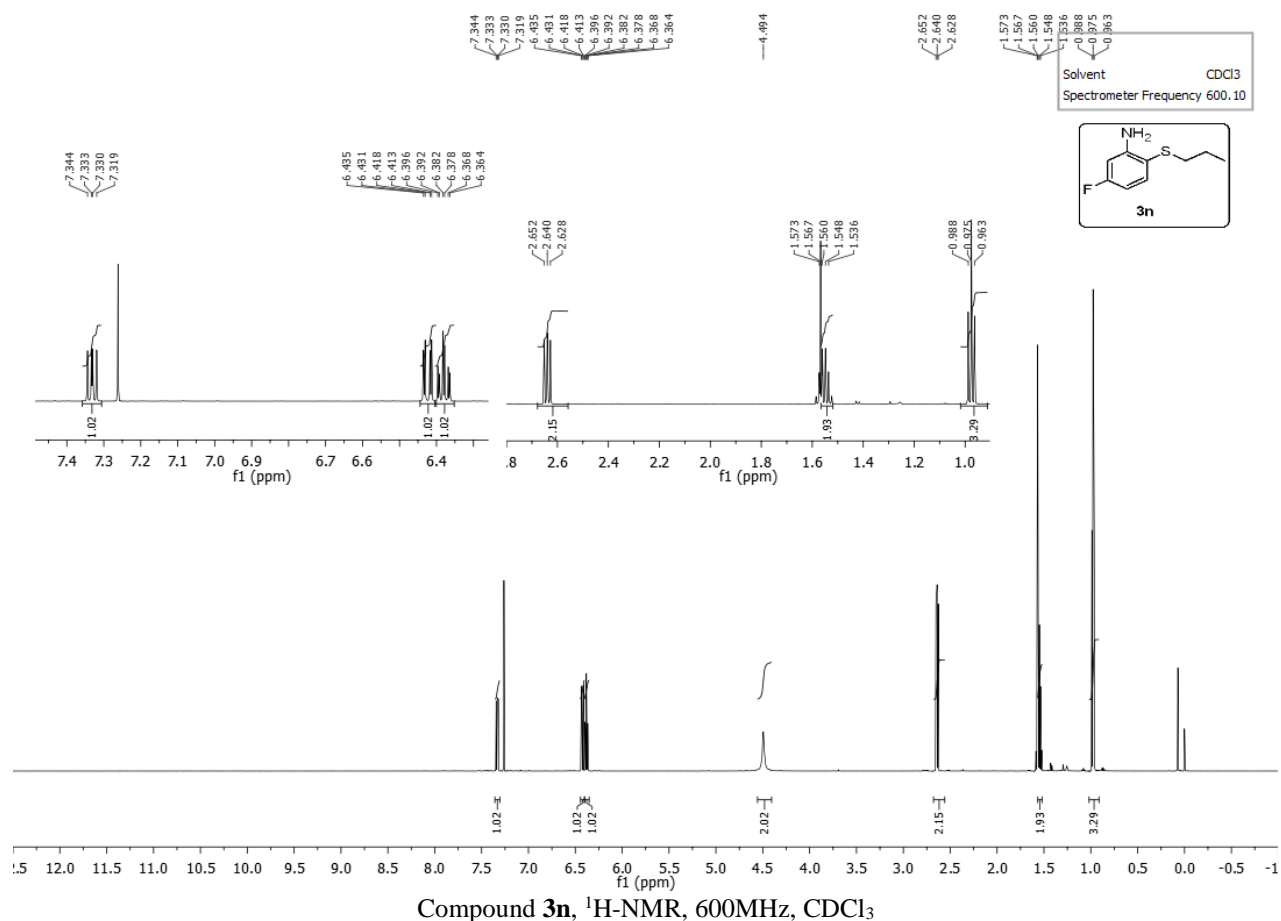

Compound **3n**,  $^1\text{H-NMR}$ , 600MHz,  $\text{CDCl}_3$

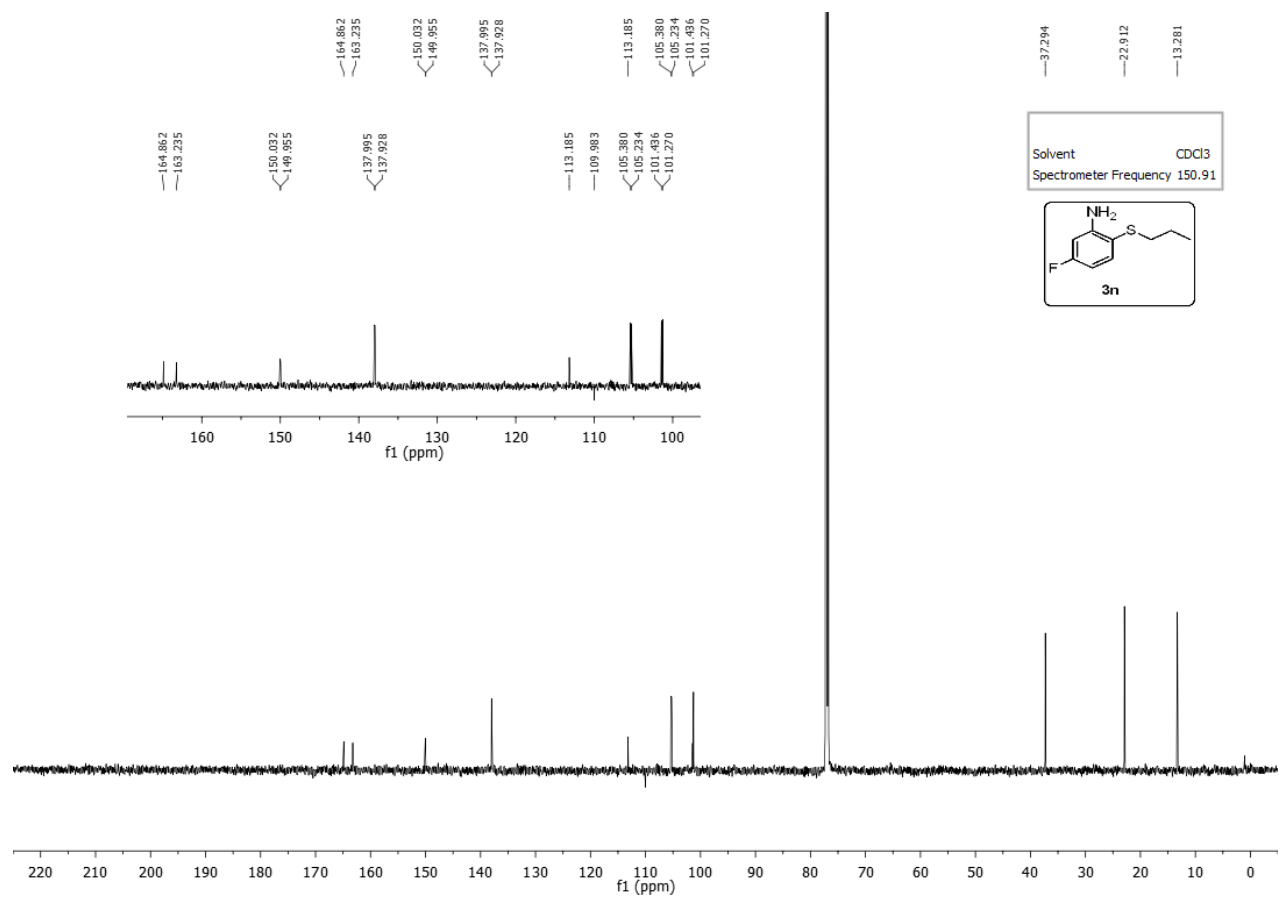

Compound **3n**,  $^{13}\text{C-NMR}$ , 150MHz,  $\text{CDCl}_3$

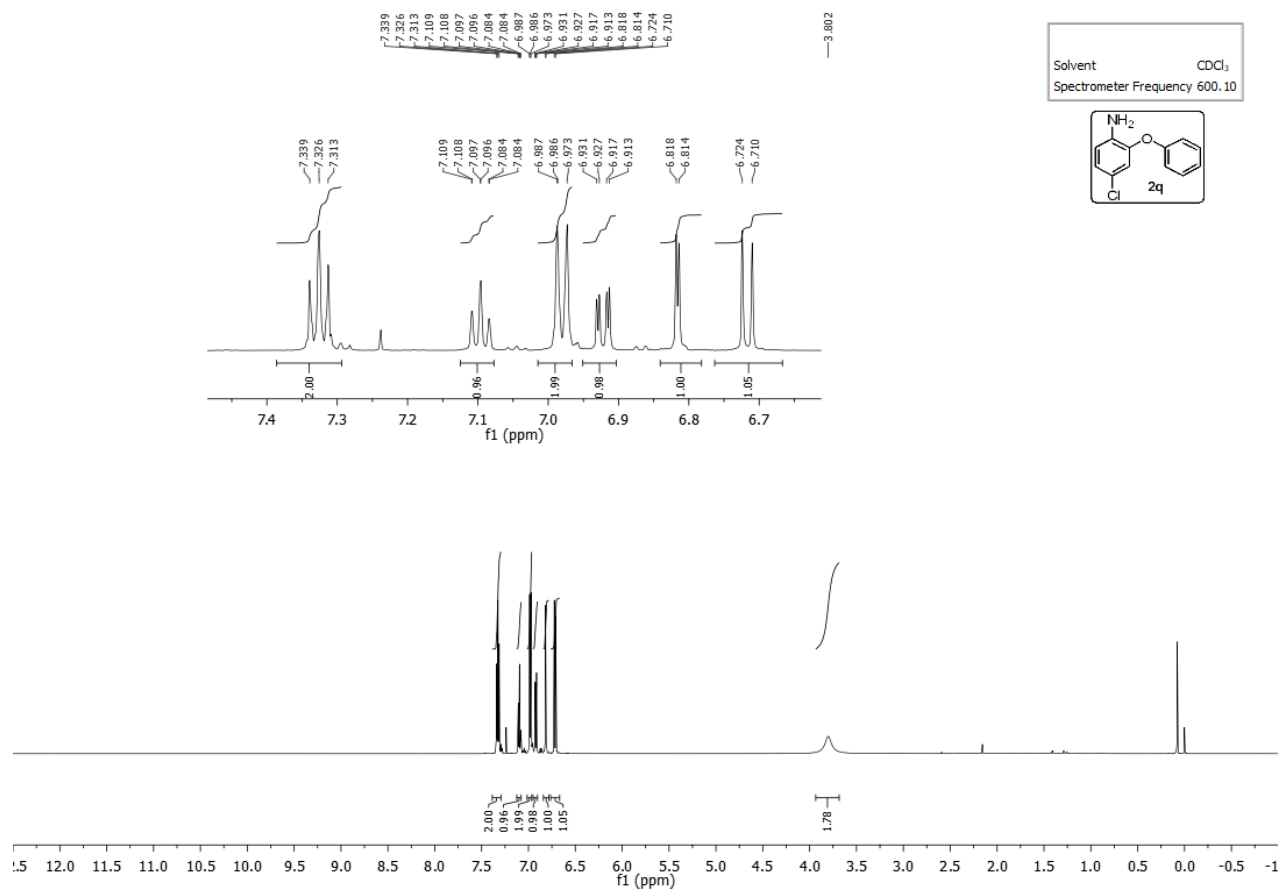

Compound **2q**,  $^1\text{H-NMR}$ , 600MHz,  $\text{CDCl}_3$

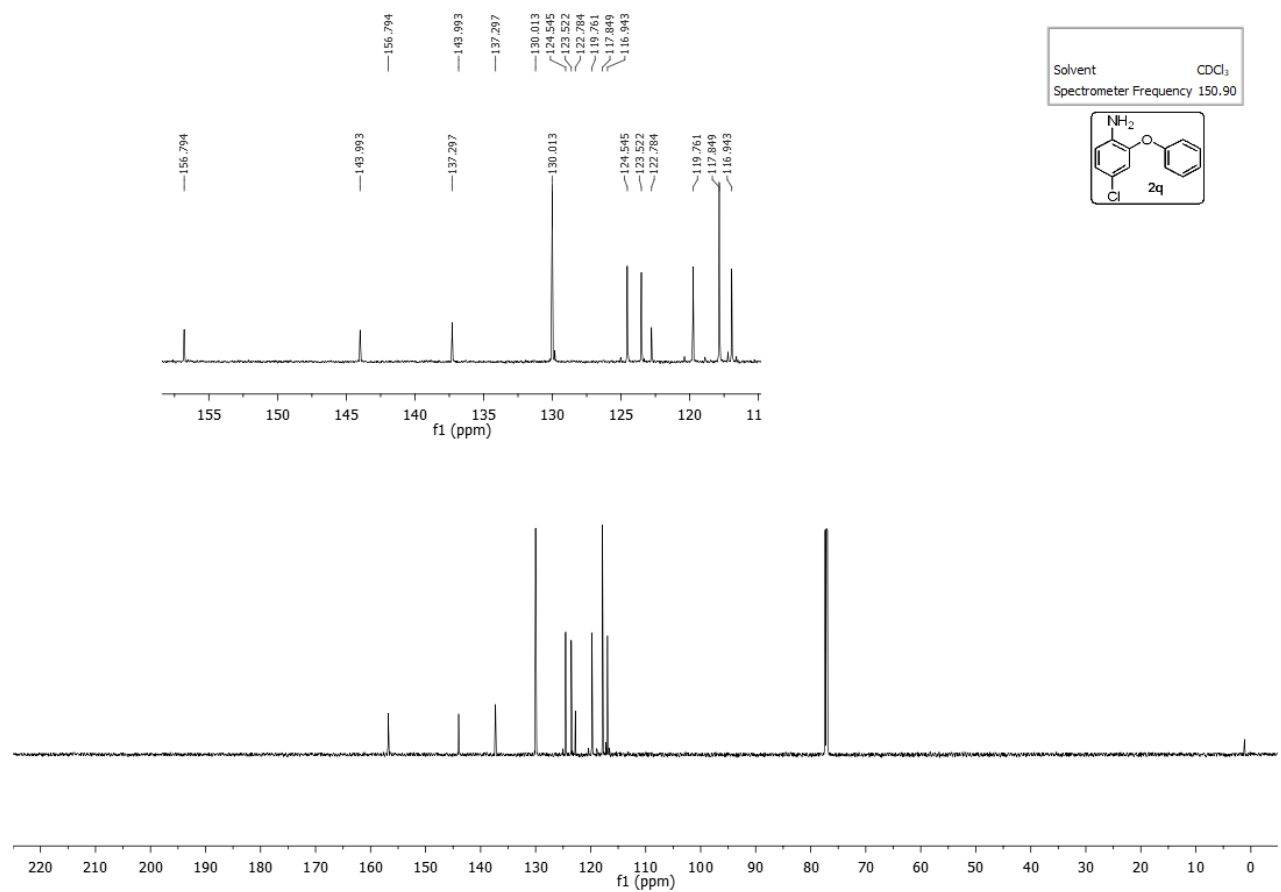

Compound **2q**,  $^{13}\text{C-NMR}$ , 150MHz,  $\text{CDCl}_3$

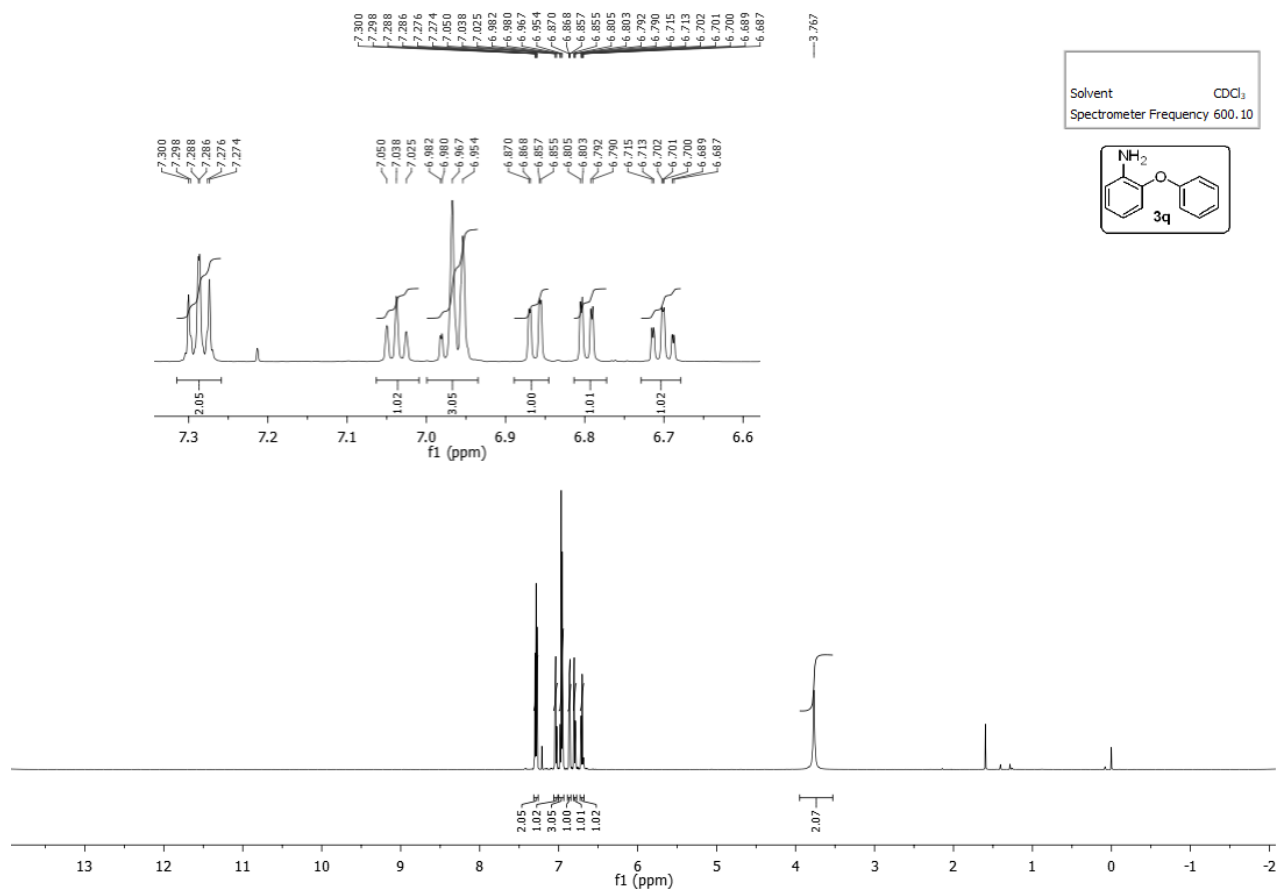

Compound **3q**,  $^1\text{H-NMR}$ , 600MHz,  $\text{CDCl}_3$

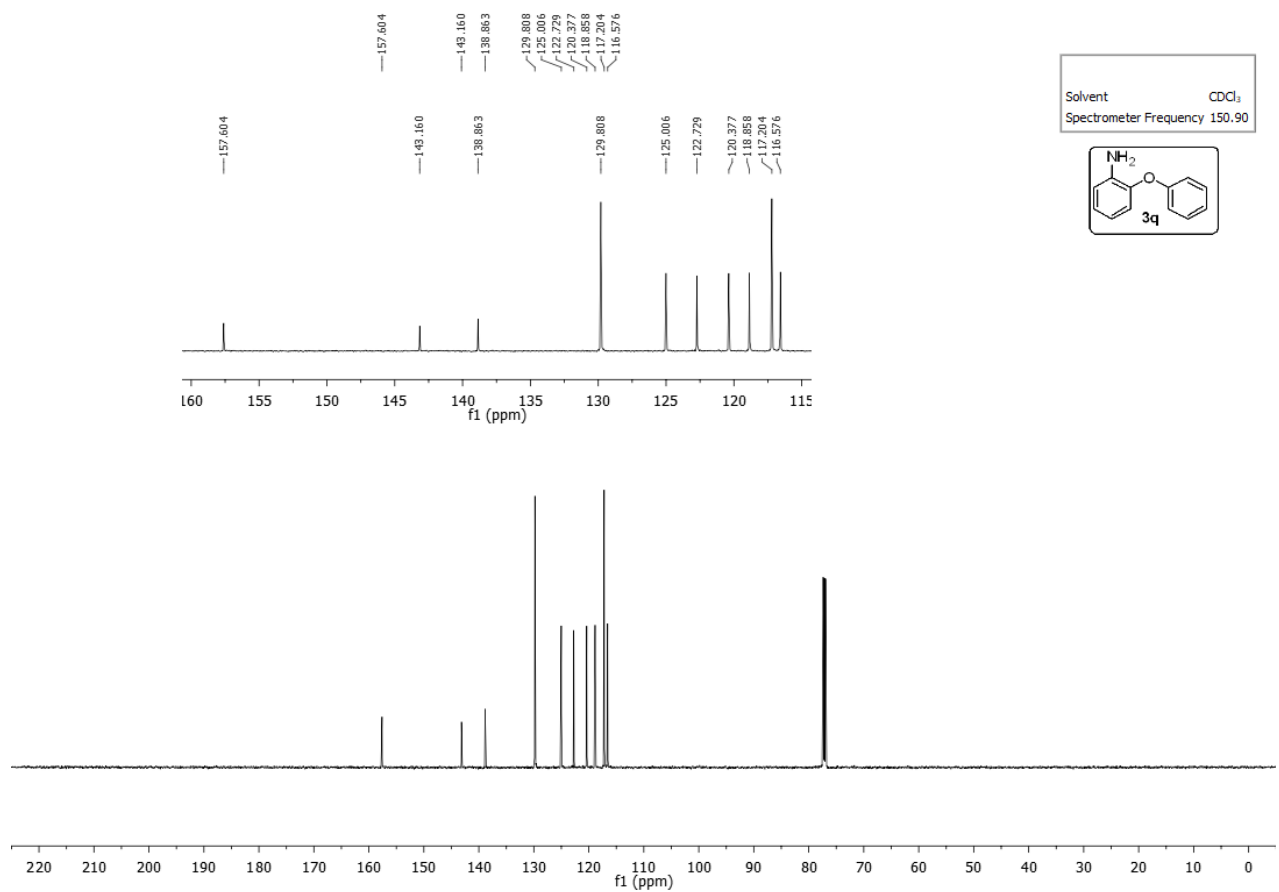

Compound **3q**,  $^{13}\text{C-NMR}$ , 150MHz,  $\text{CDCl}_3$

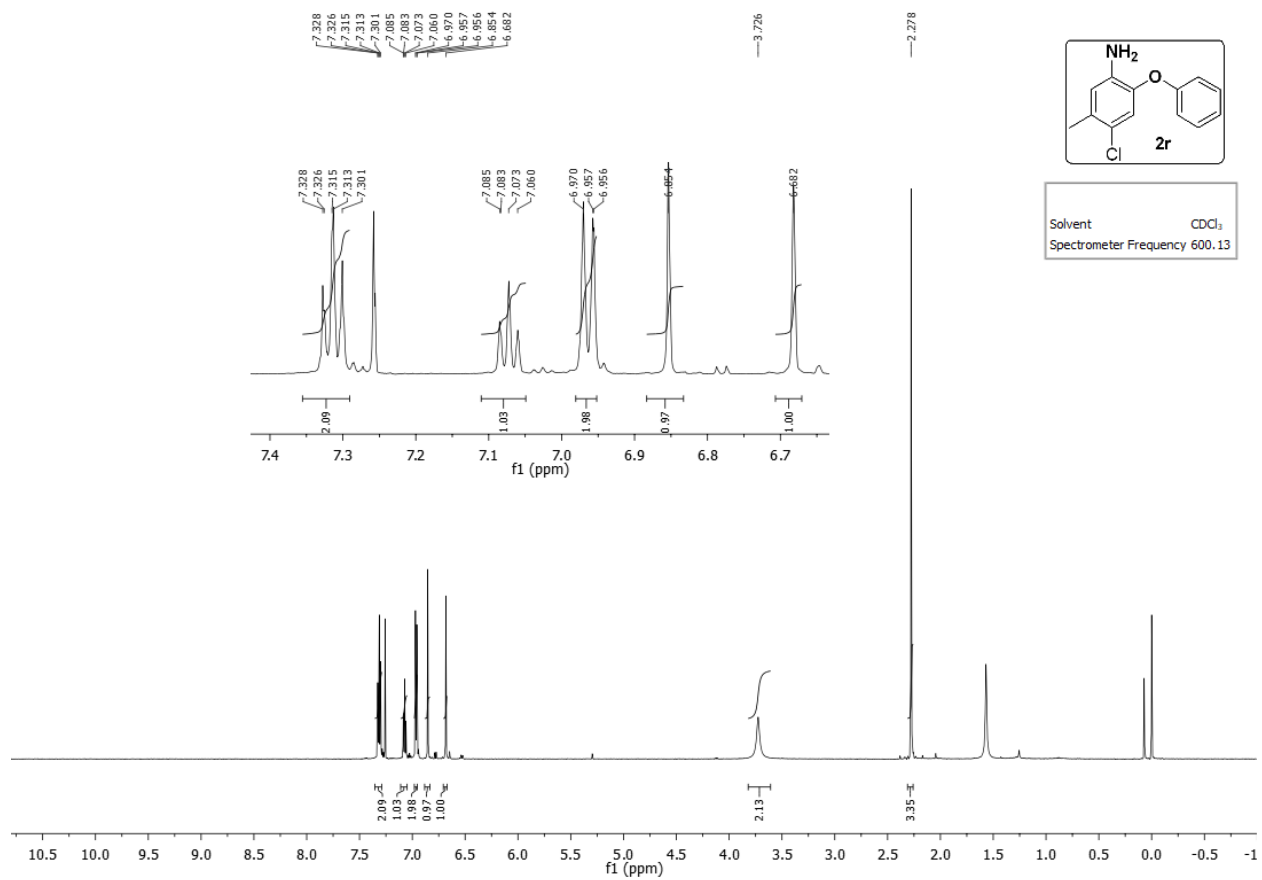

Compound **2r**, <sup>1</sup>H-NMR, 600MHz, CDCl<sub>3</sub>

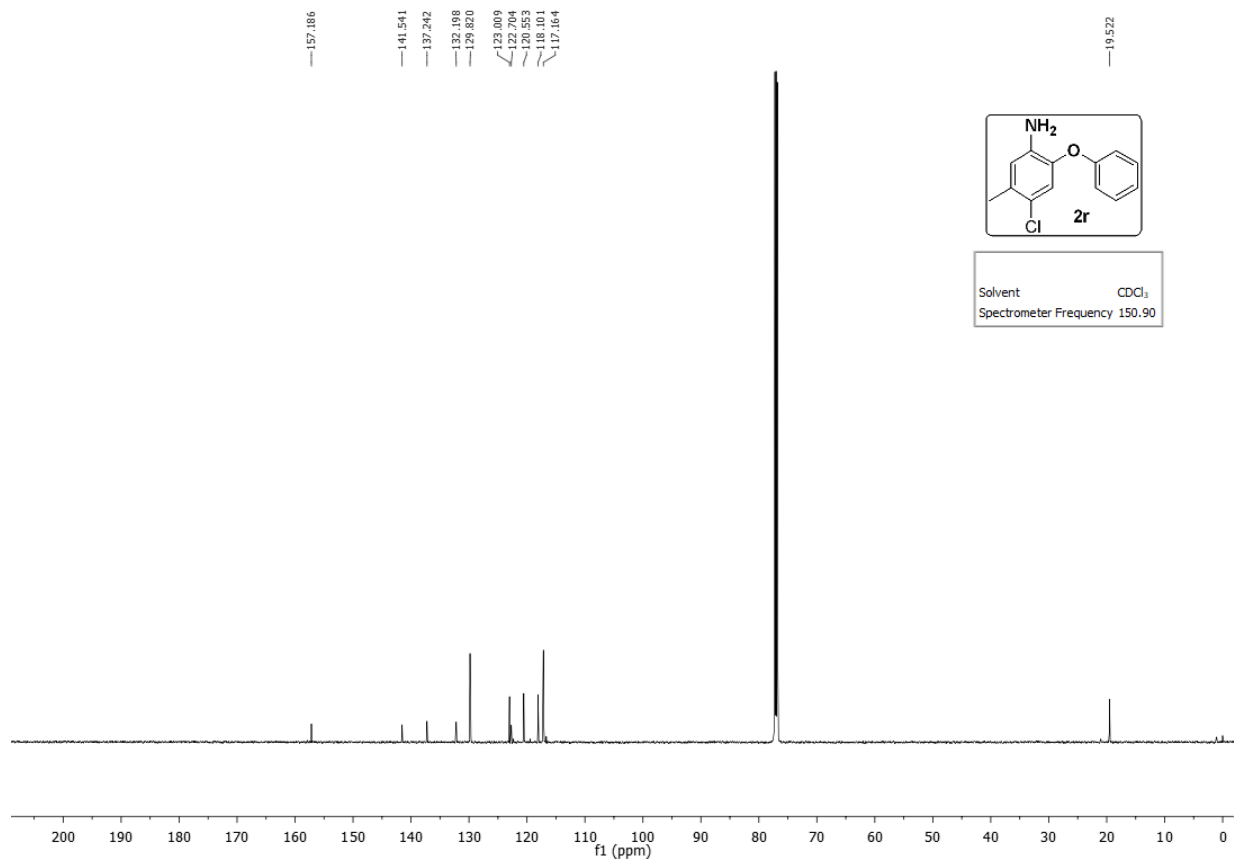

Compound **2r**, <sup>13</sup>C-NMR, 150MHz, CDCl<sub>3</sub>



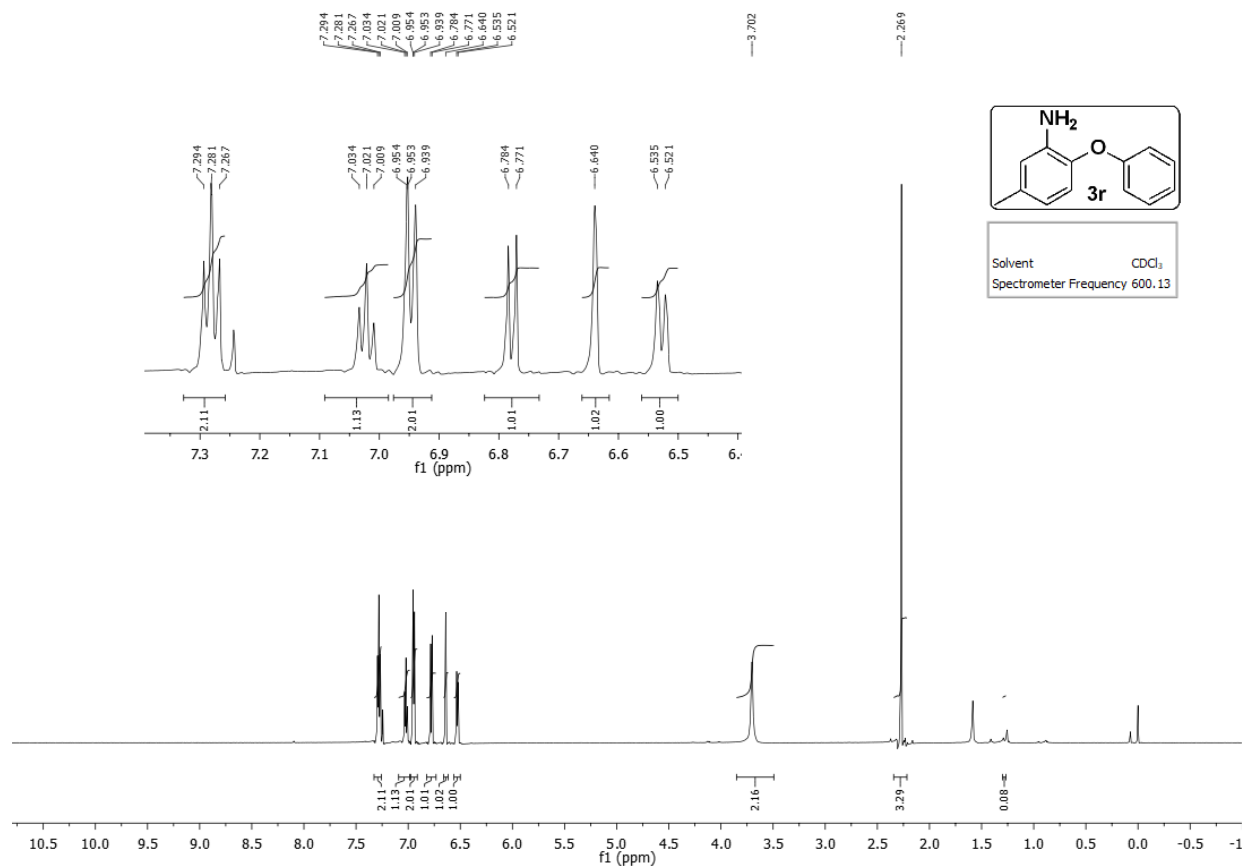

Compound **3r**,  $^1\text{H-NMR}$ , 600MHz,  $\text{CDCl}_3$

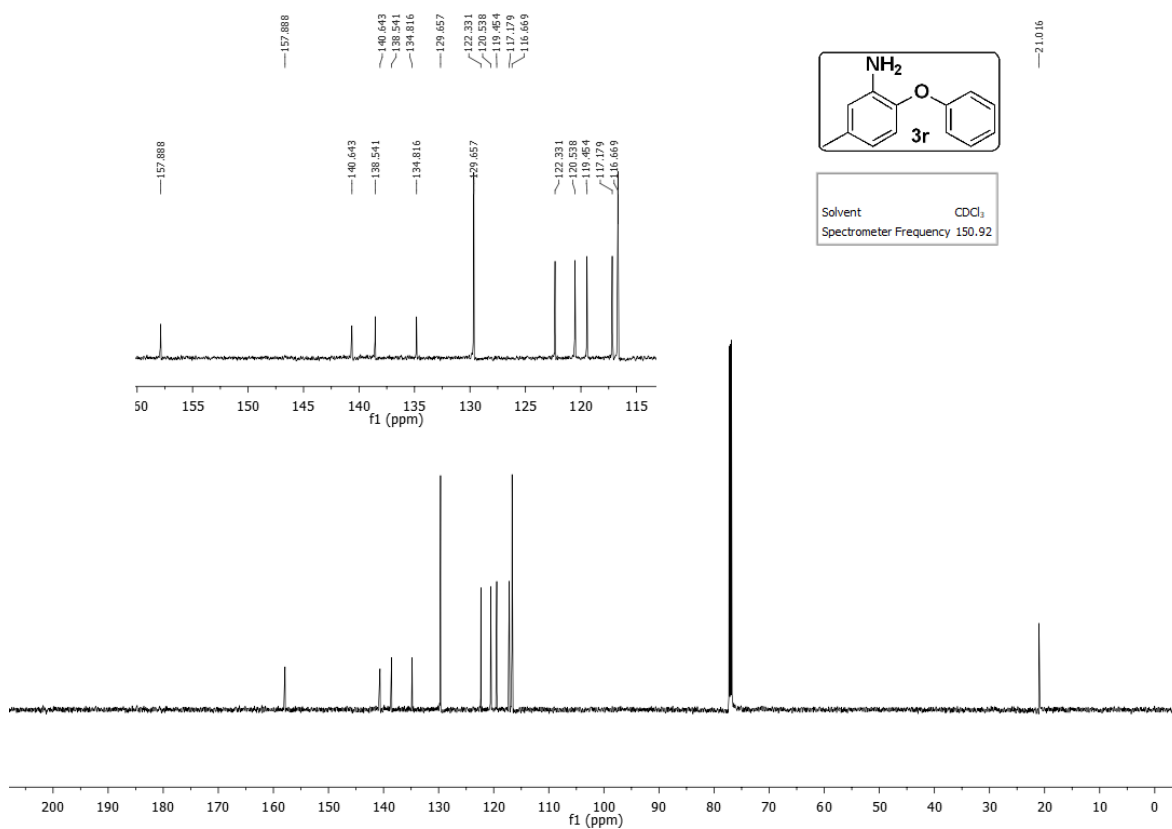

Compound **3r**,  $^{13}\text{C-NMR}$ , 150MHz,  $\text{CDCl}_3$

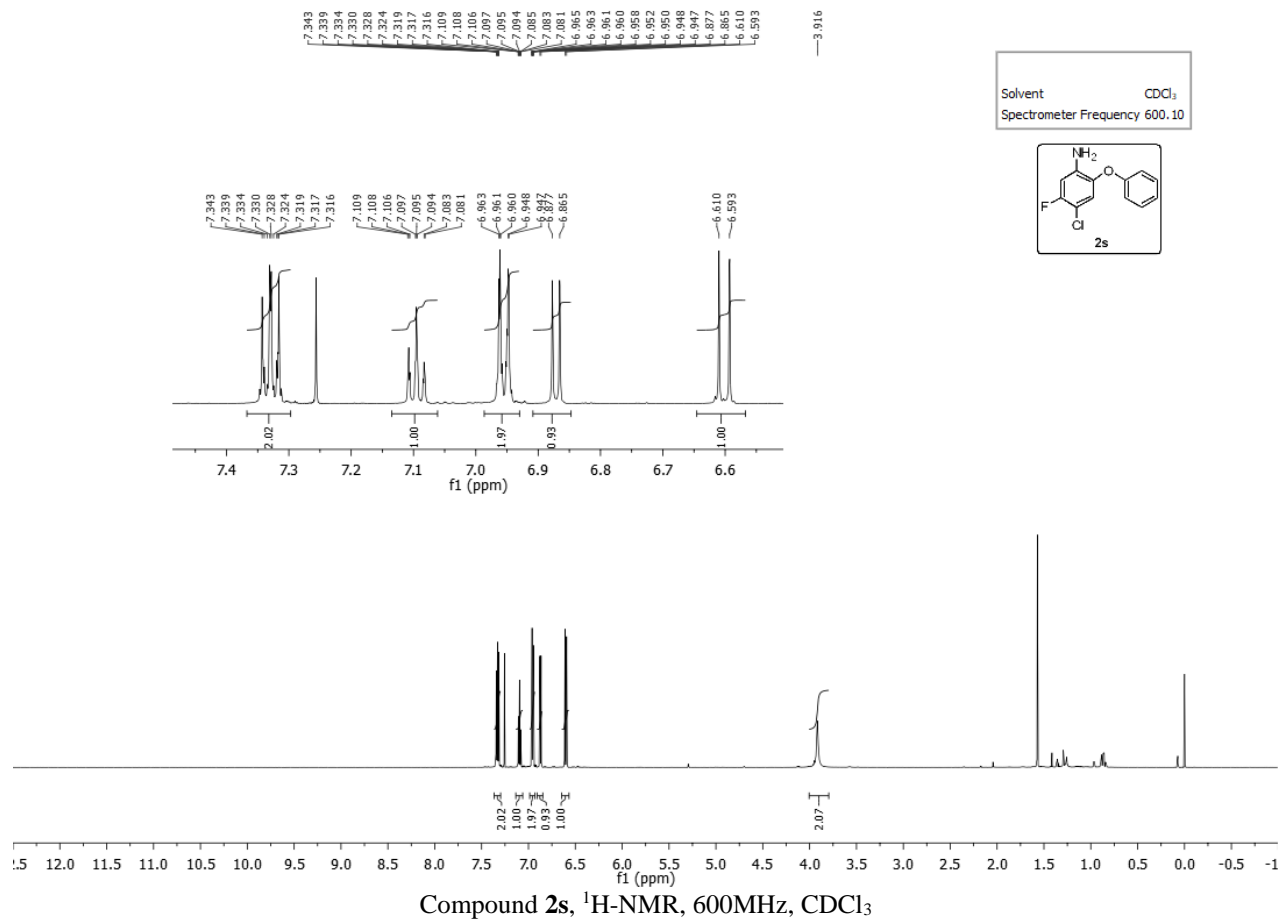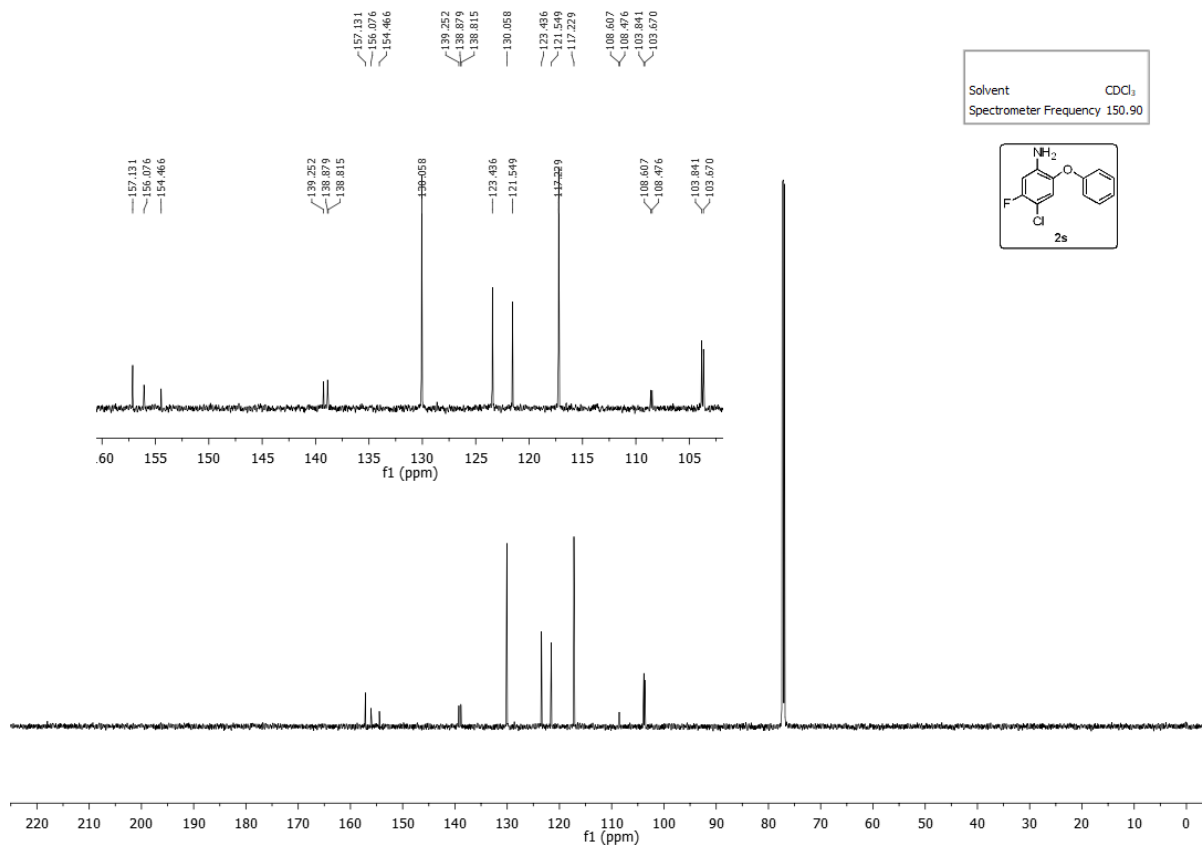

Compound **2s**,  $^{13}\text{C-NMR}$ , 150MHz,  $\text{CDCl}_3$

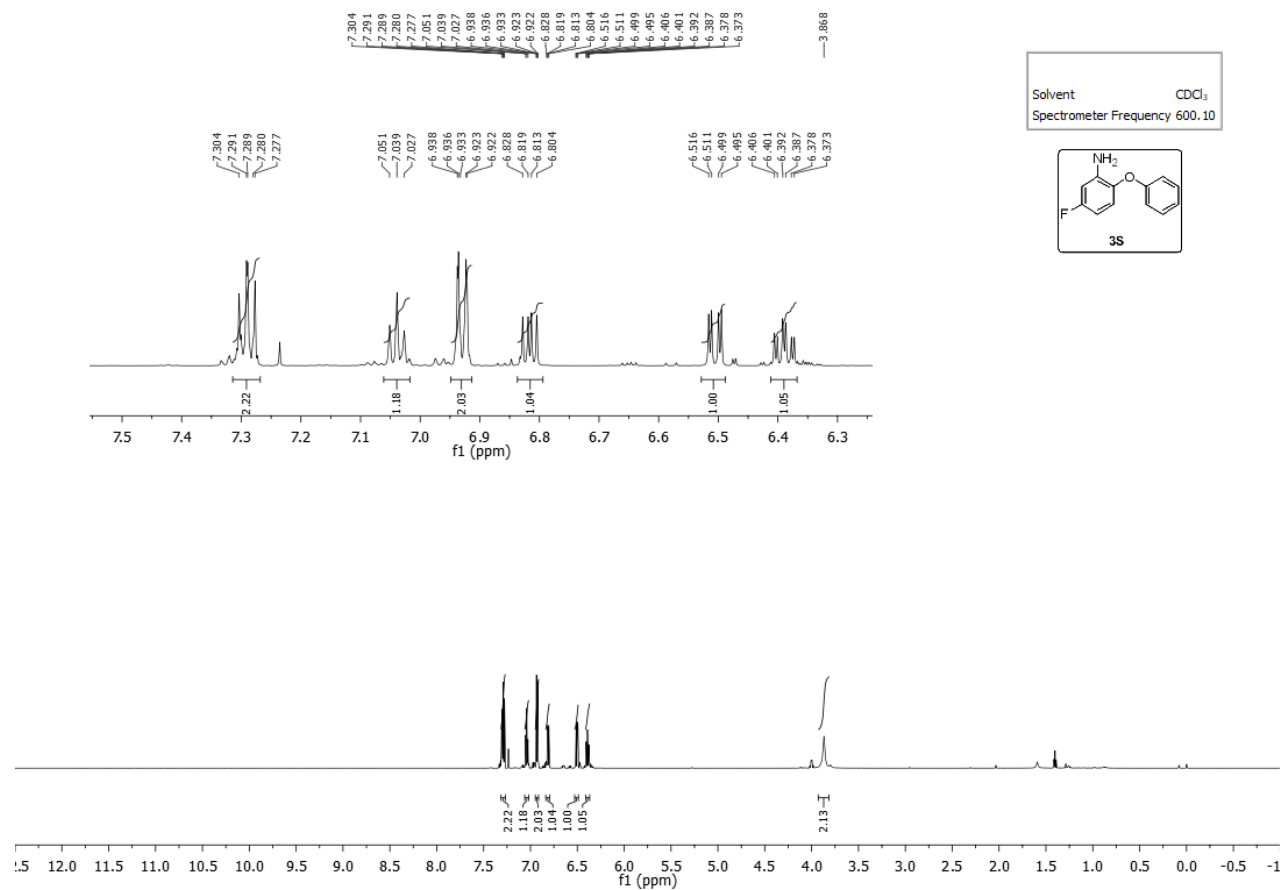

Compound 3s,  $^1\text{H-NMR}$ , 600MHz,  $\text{CDCl}_3$

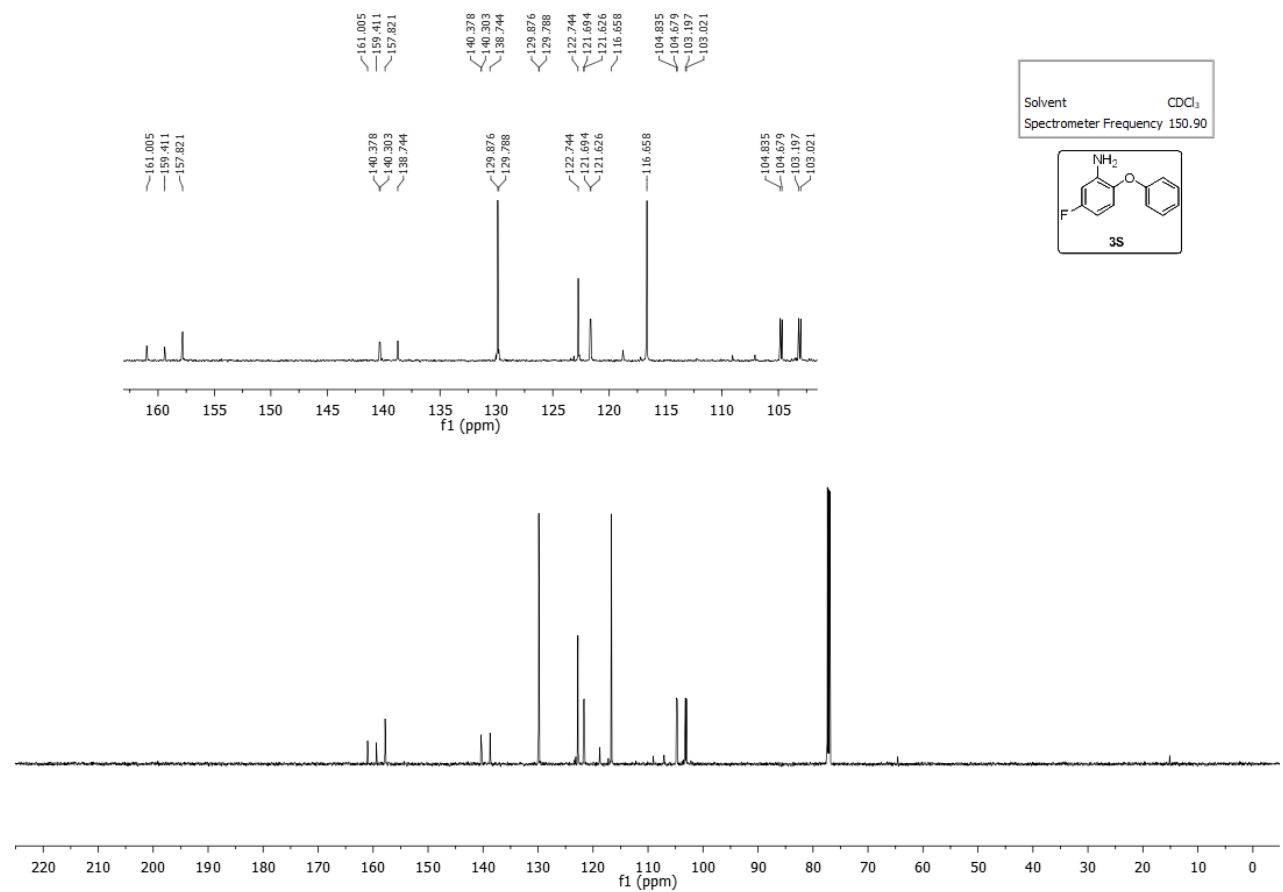

Compound 3s,  $^{13}\text{C-NMR}$ , 150MHz,  $\text{CDCl}_3$

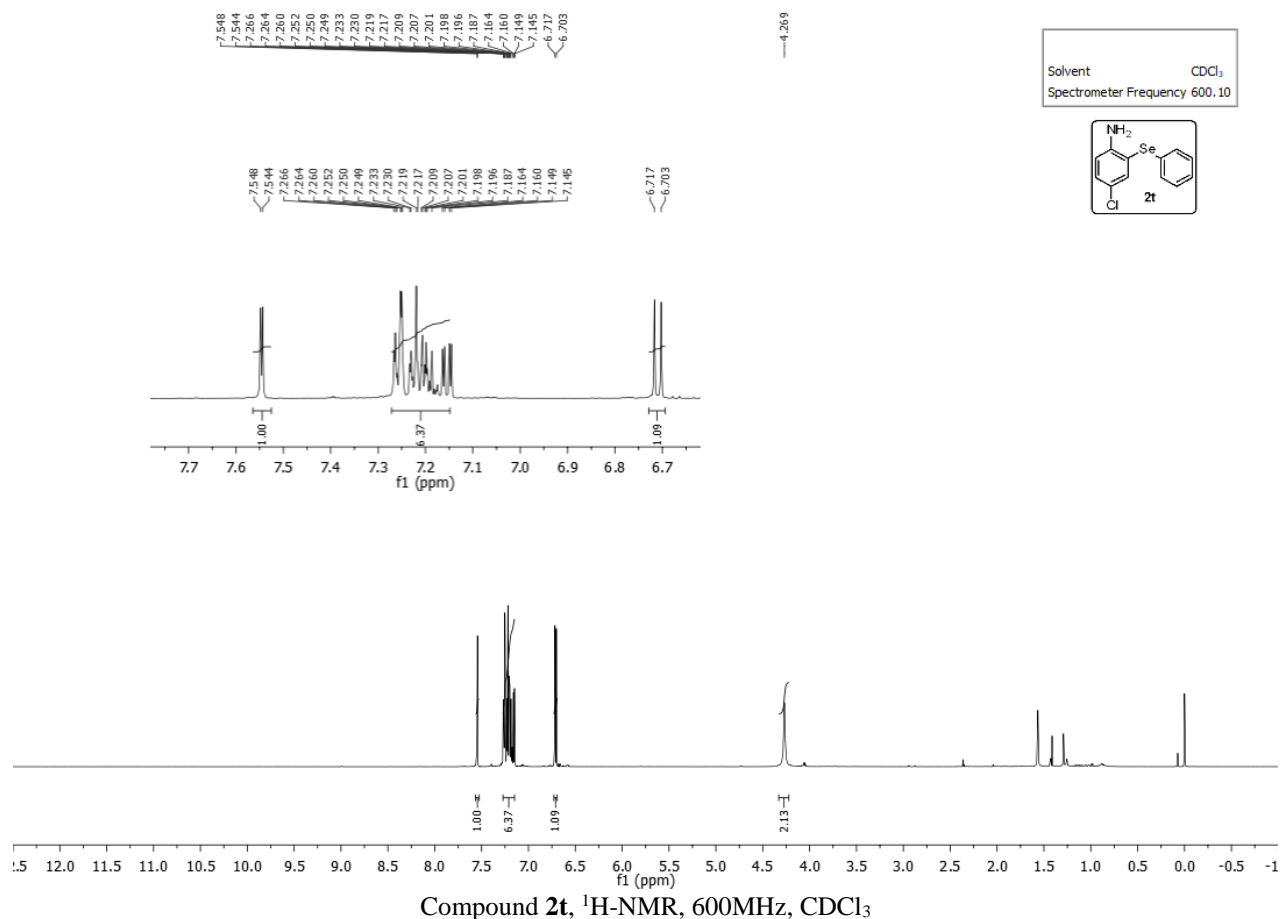

Compound **2t**,  $^1\text{H-NMR}$ , 600MHz,  $\text{CDCl}_3$

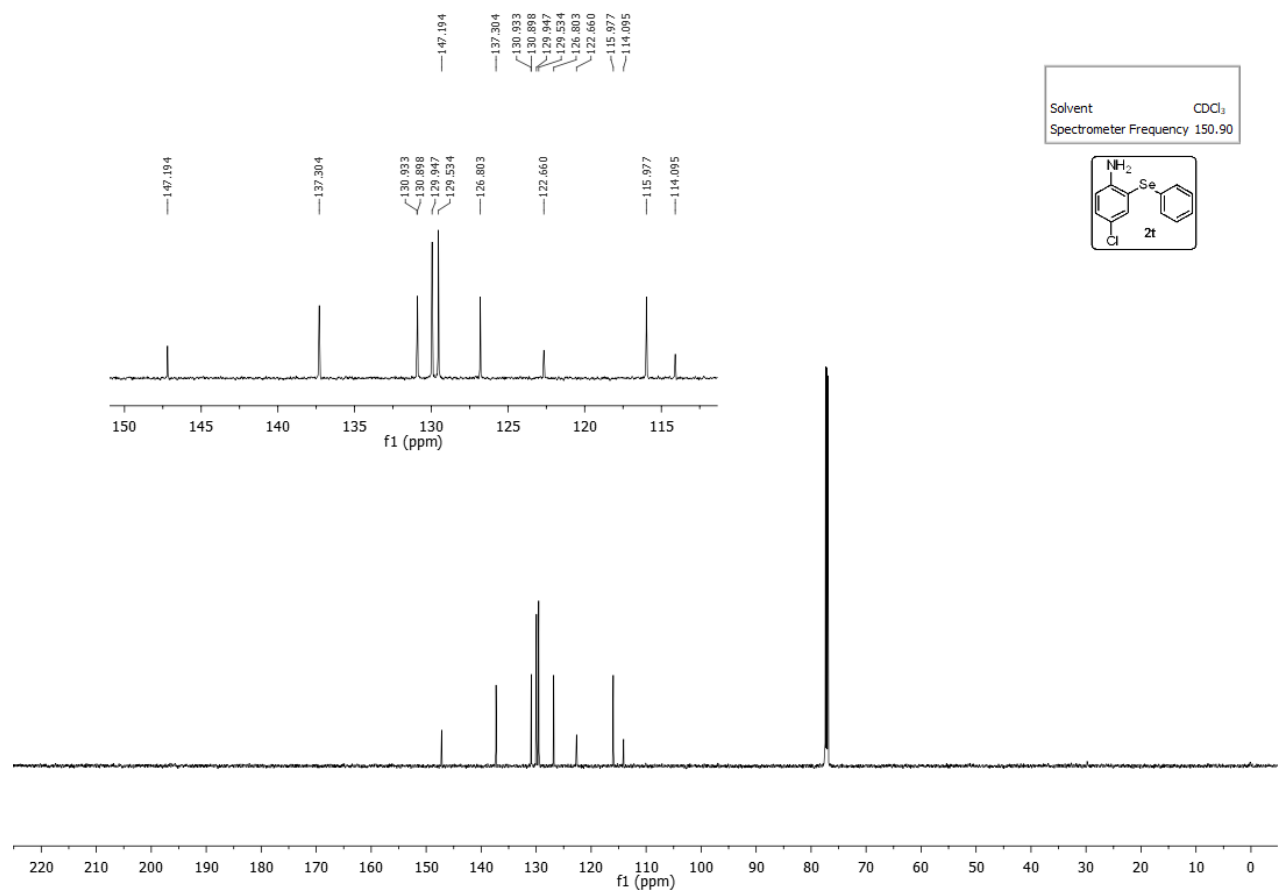

Compound **2t**,  $^{13}\text{C-NMR}$ , 150MHz,  $\text{CDCl}_3$



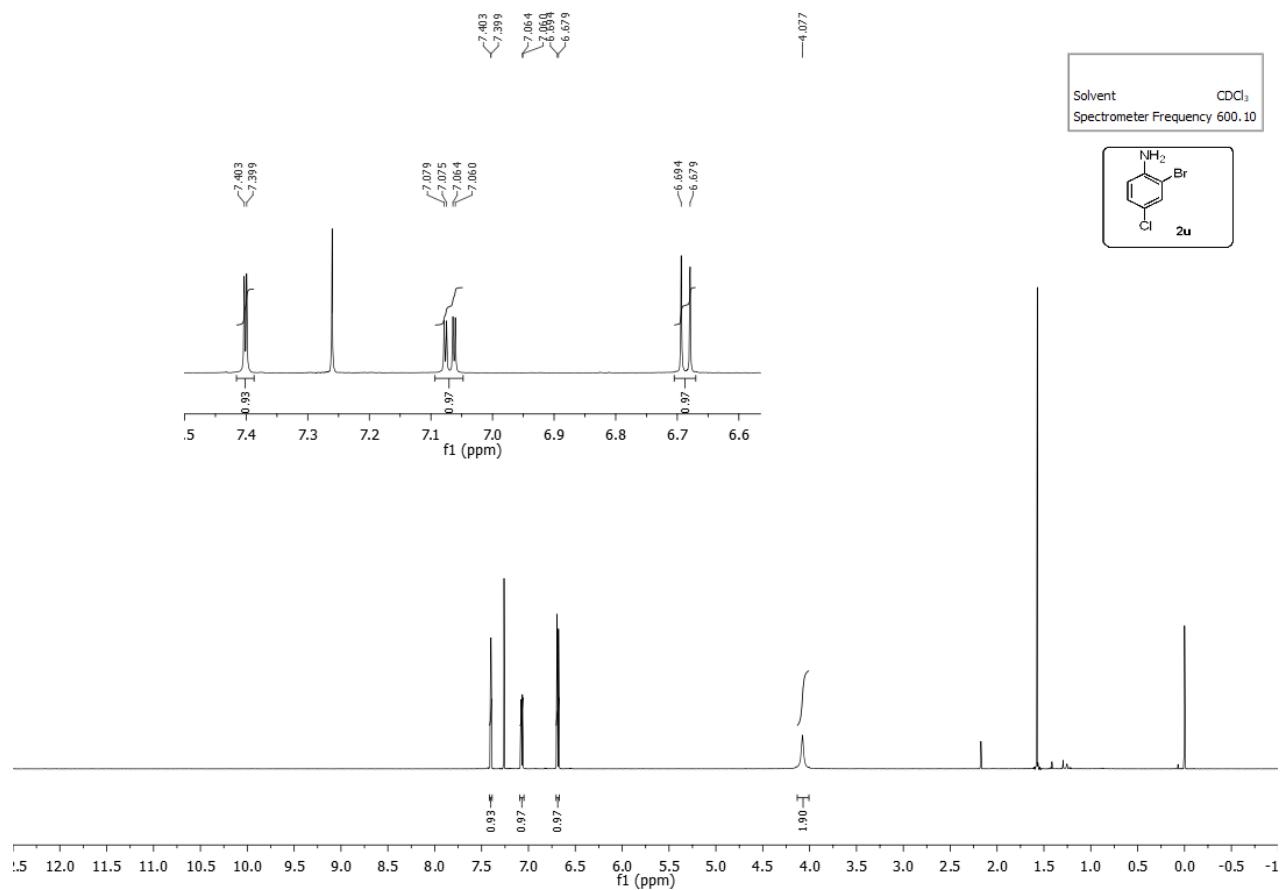

Compound **2u**,  $^1\text{H-NMR}$ , 600MHz,  $\text{CDCl}_3$

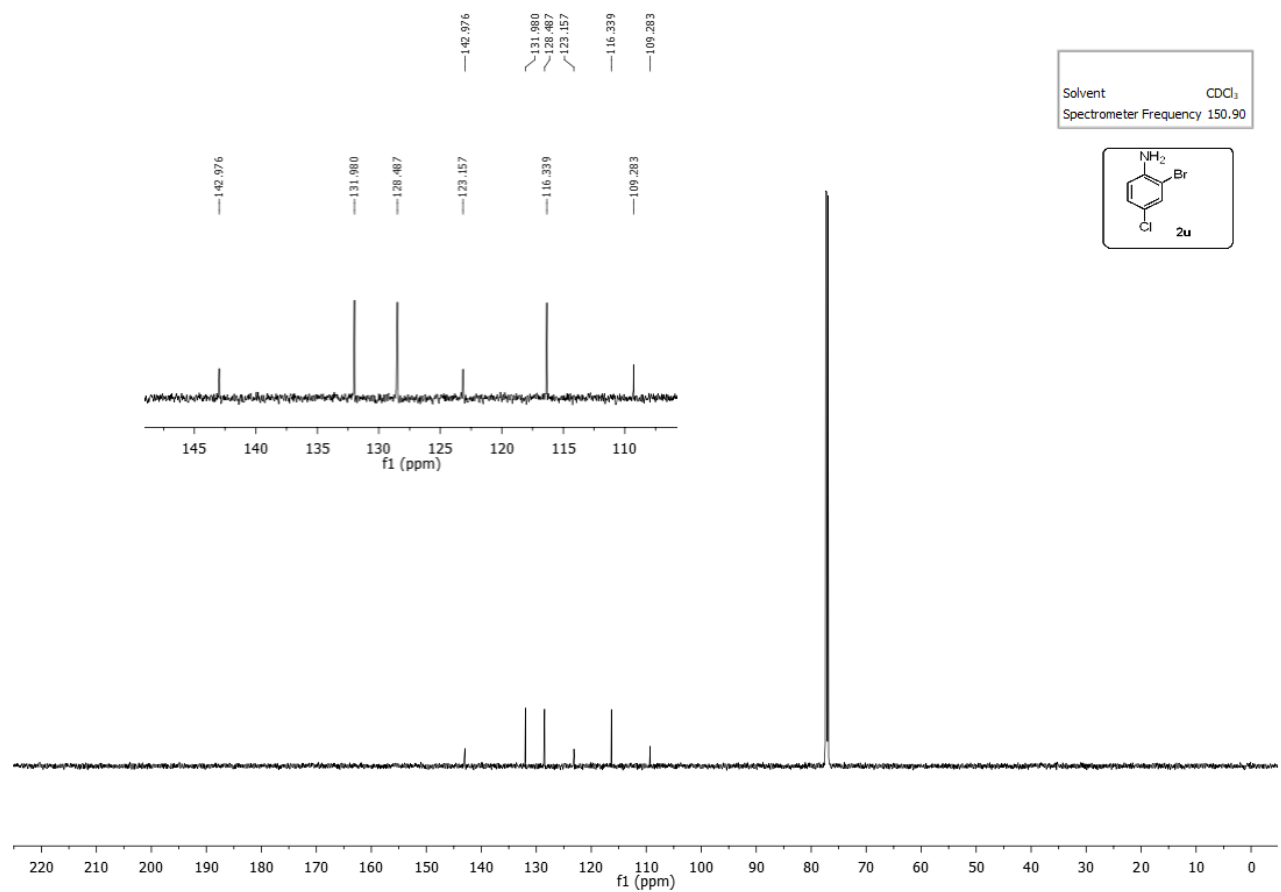

Compound **2u**,  $^{13}\text{C-NMR}$ , 150MHz,  $\text{CDCl}_3$

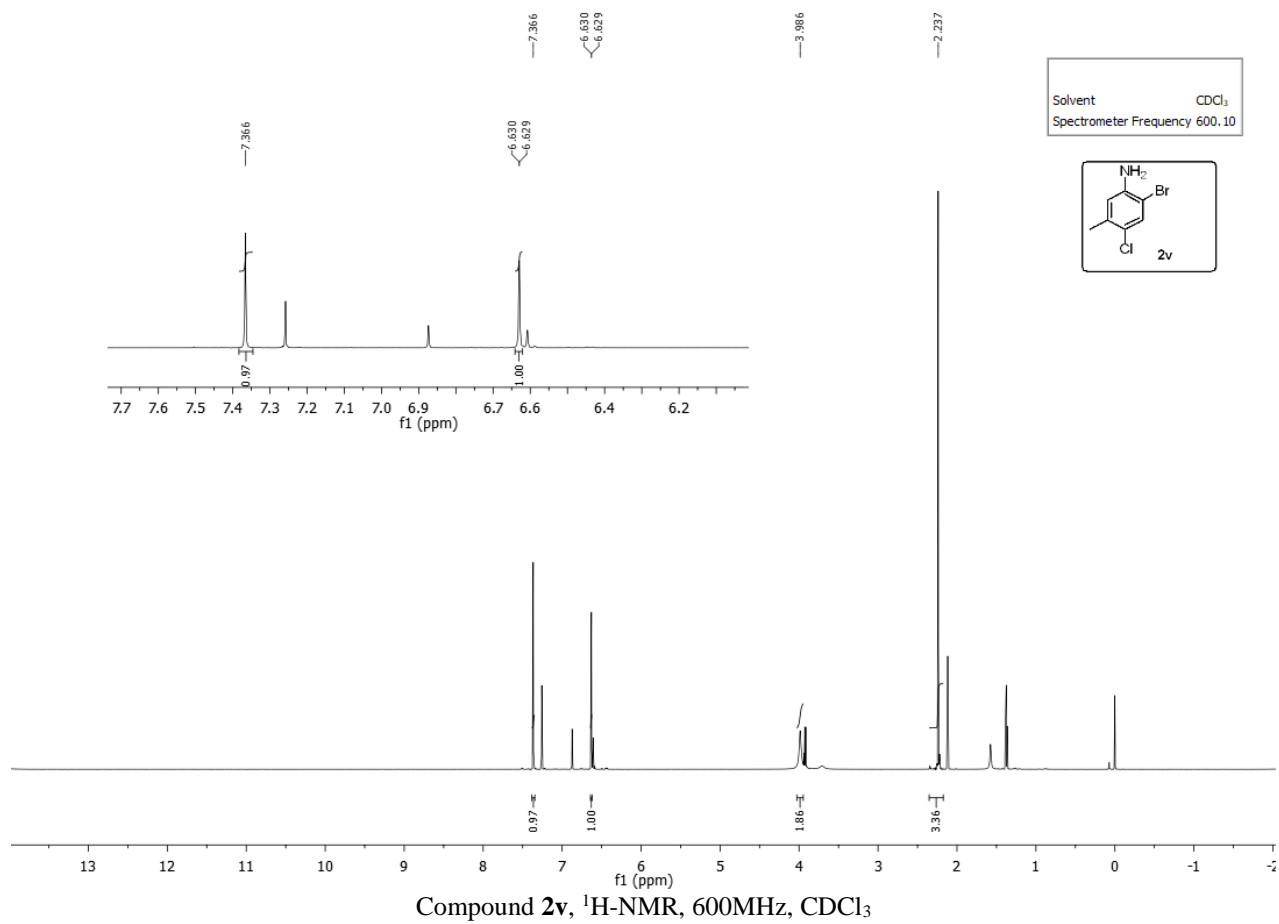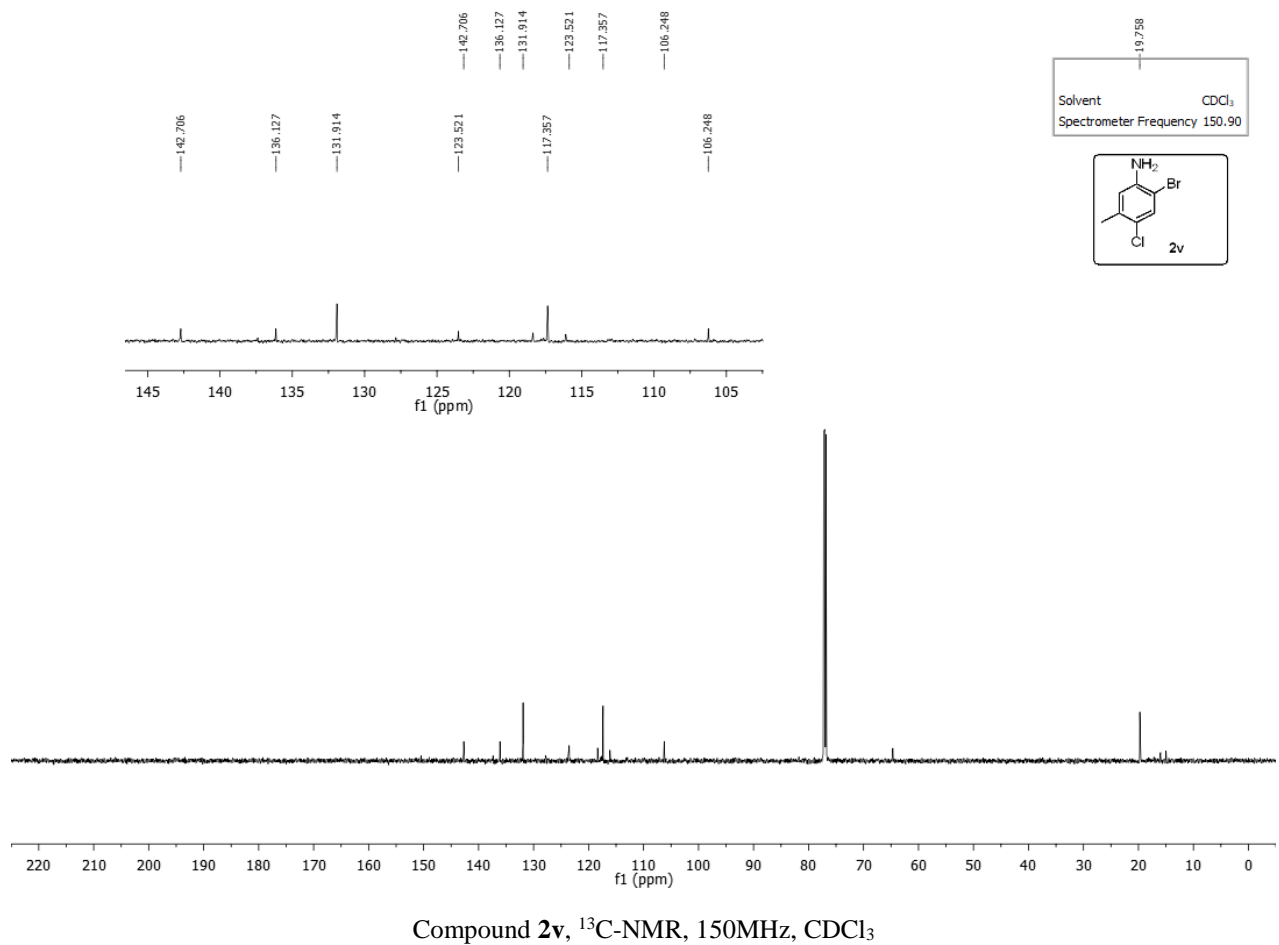

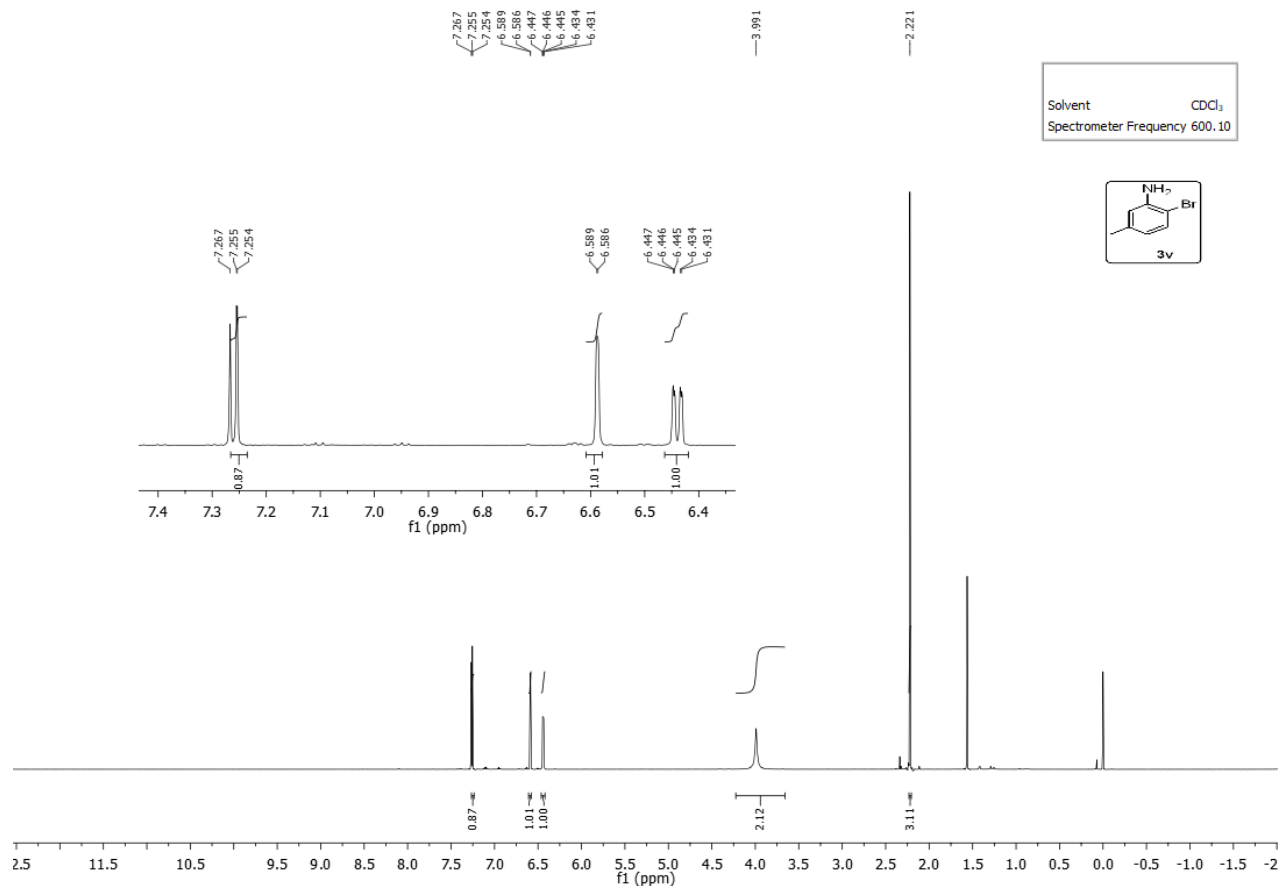

Compound **3v**,  $^1\text{H-NMR}$ , 600MHz,  $\text{CDCl}_3$

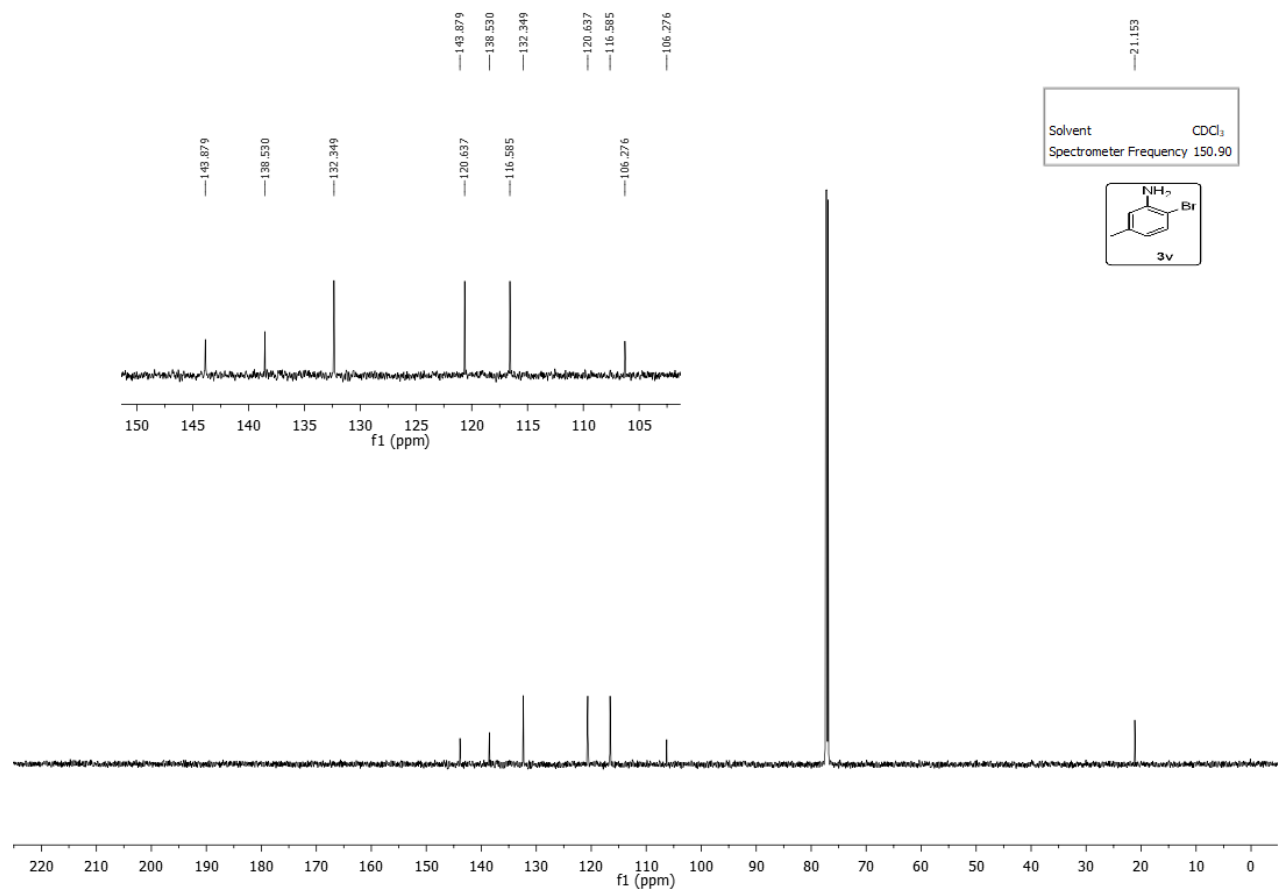

Compound **3v**,  $^{13}\text{C-NMR}$ , 150MHz,  $\text{CDCl}_3$



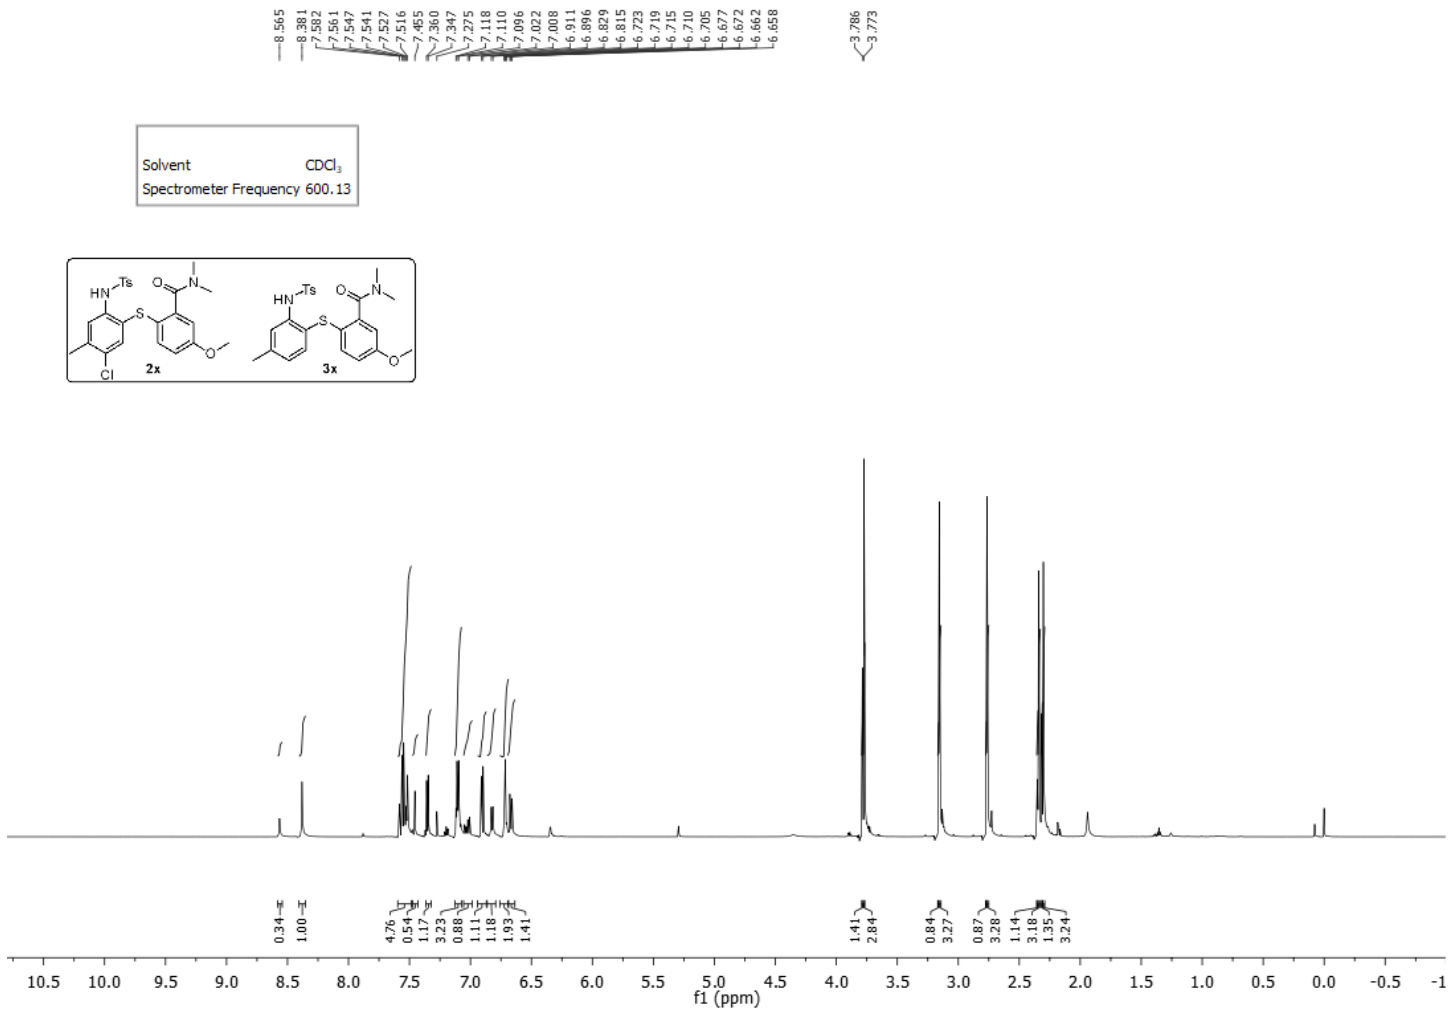

Compound **2x** and **3x**, <sup>1</sup>H-NMR, 600MHz, CDCl<sub>3</sub>

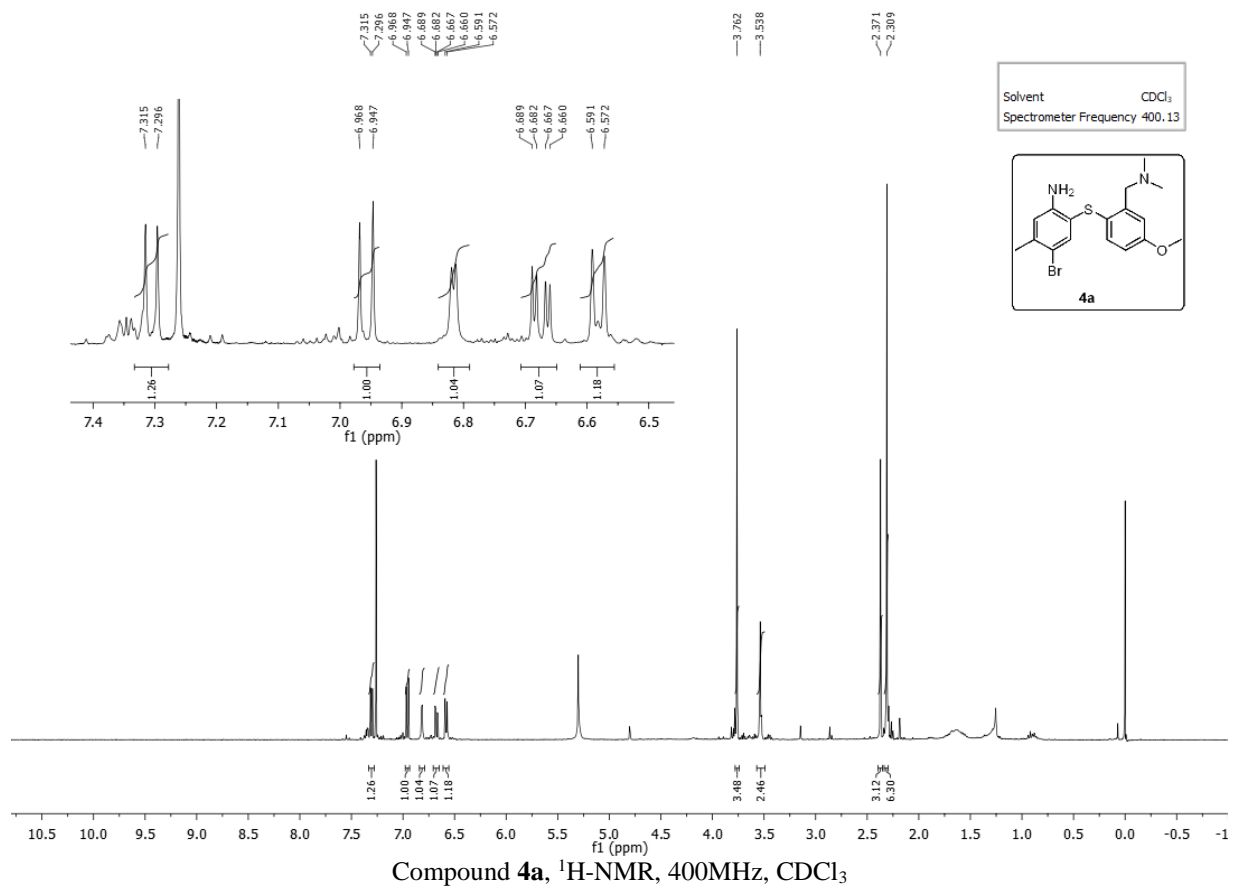

Compound **4a**,  $^1\text{H-NMR}$ , 400MHz,  $\text{CDCl}_3$

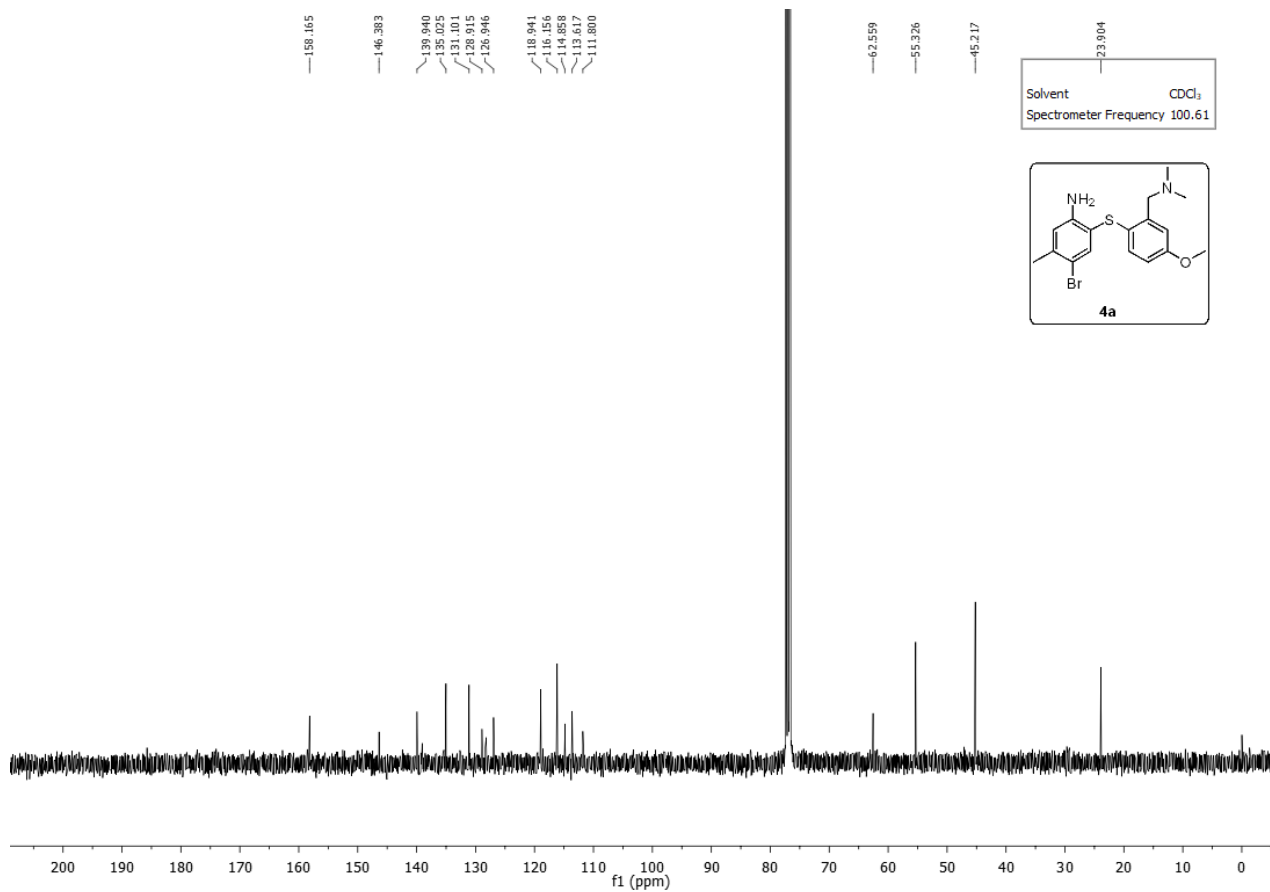

Compound **4a**,  $^{13}\text{C-NMR}$ , 100MHz,  $\text{CDCl}_3$

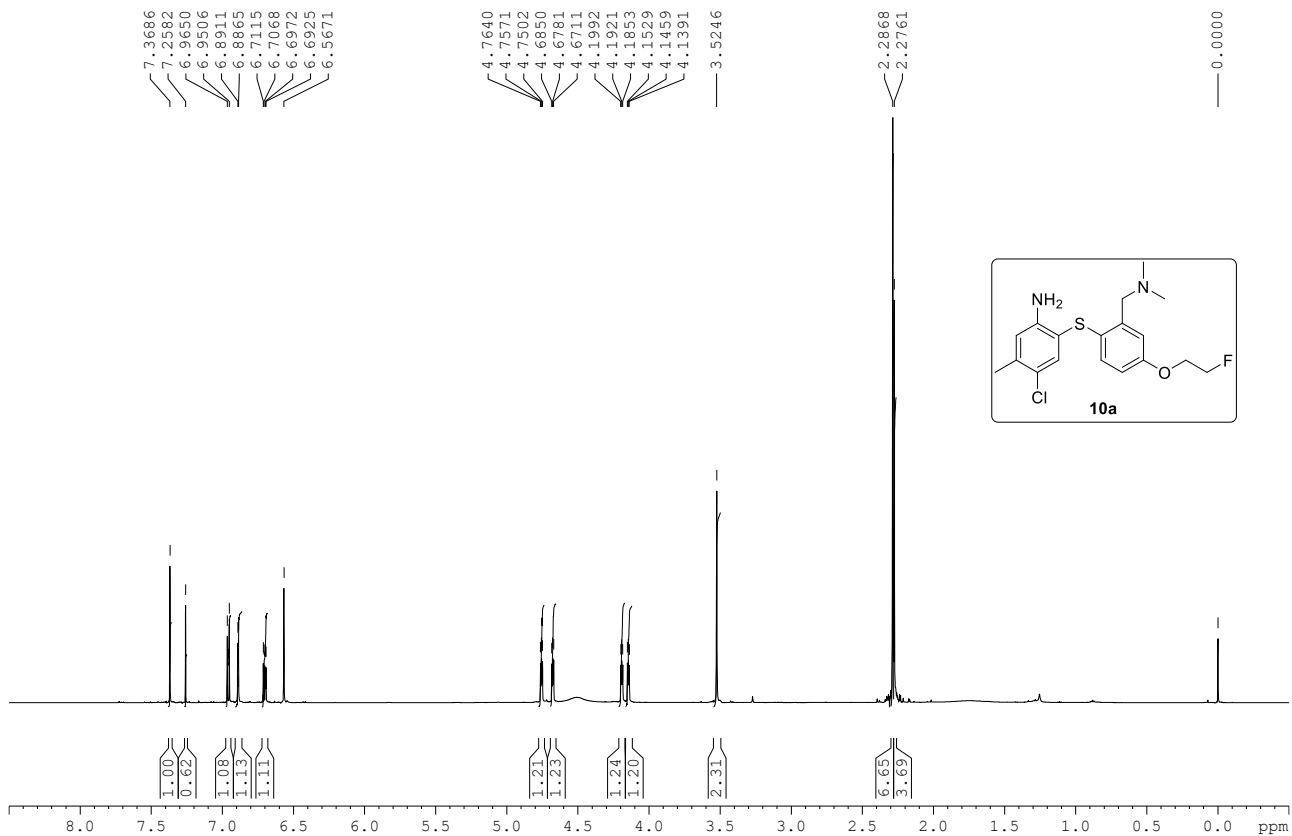

Compound **10a**,  $^1\text{H-NMR}$ , 600MHz,  $\text{CDCl}_3$

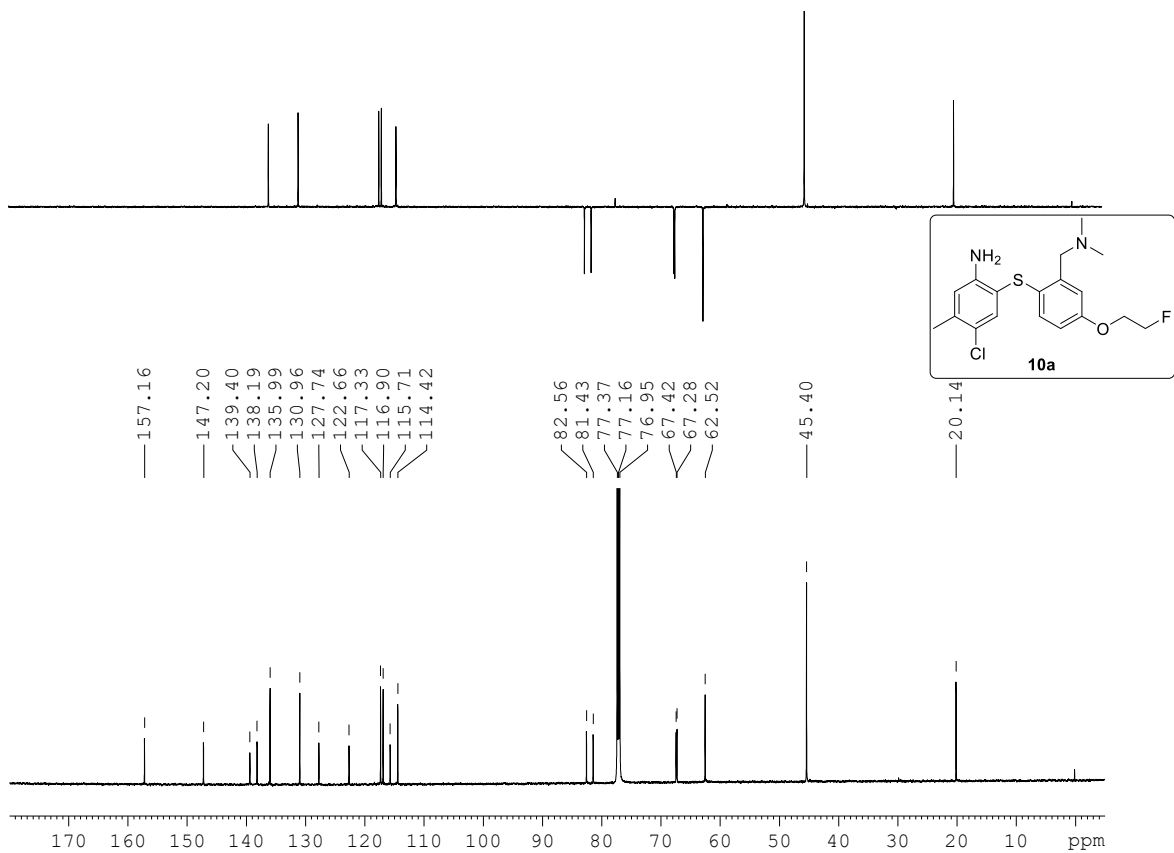

Compound **10a**,  $^{13}\text{C-NMR}$ , Dept135, 150MHz,  $\text{CDCl}_3$

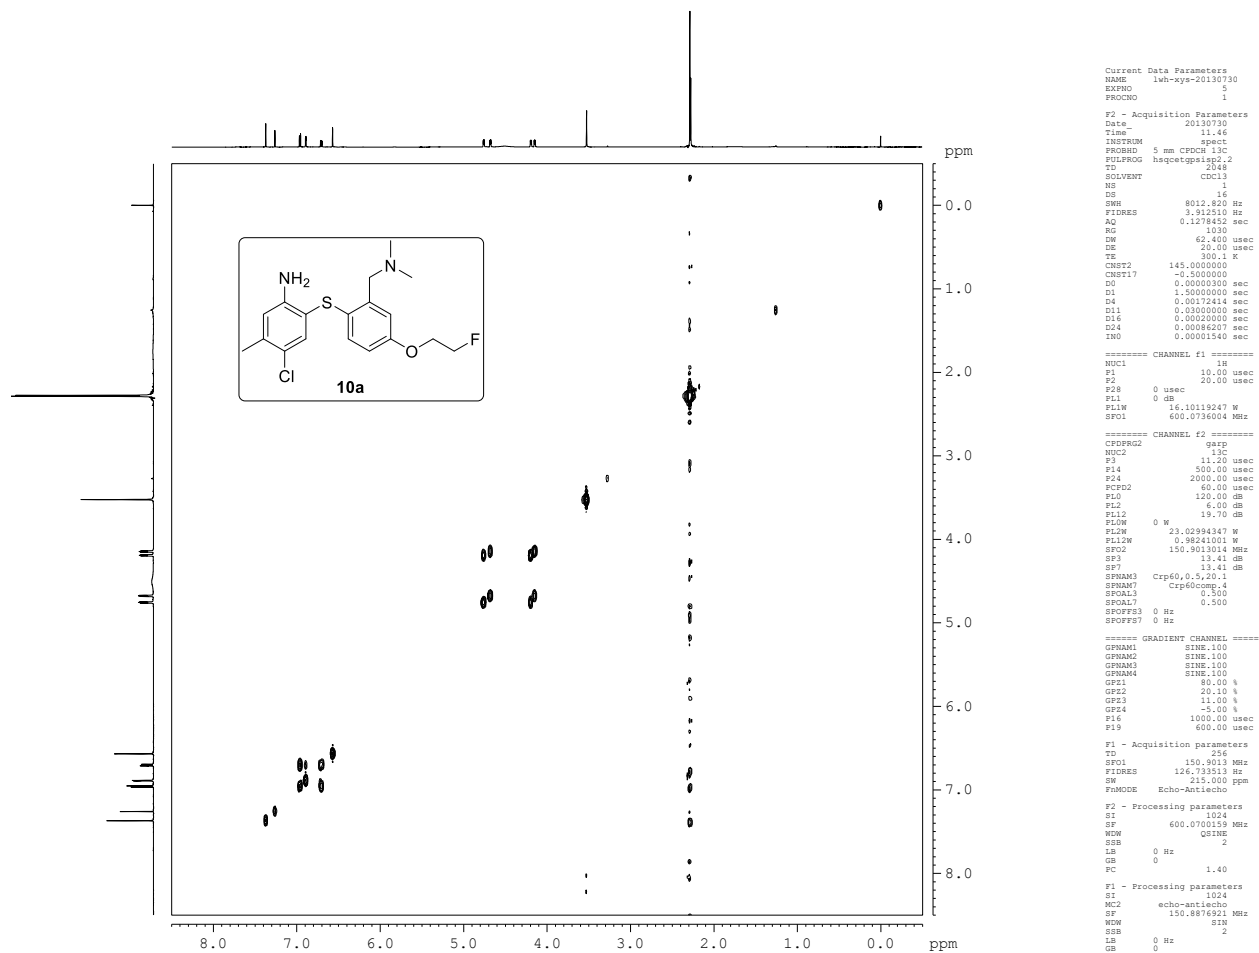

Compound 10a, <sup>1</sup>H-<sup>1</sup>H COSY, CDCl<sub>3</sub>.

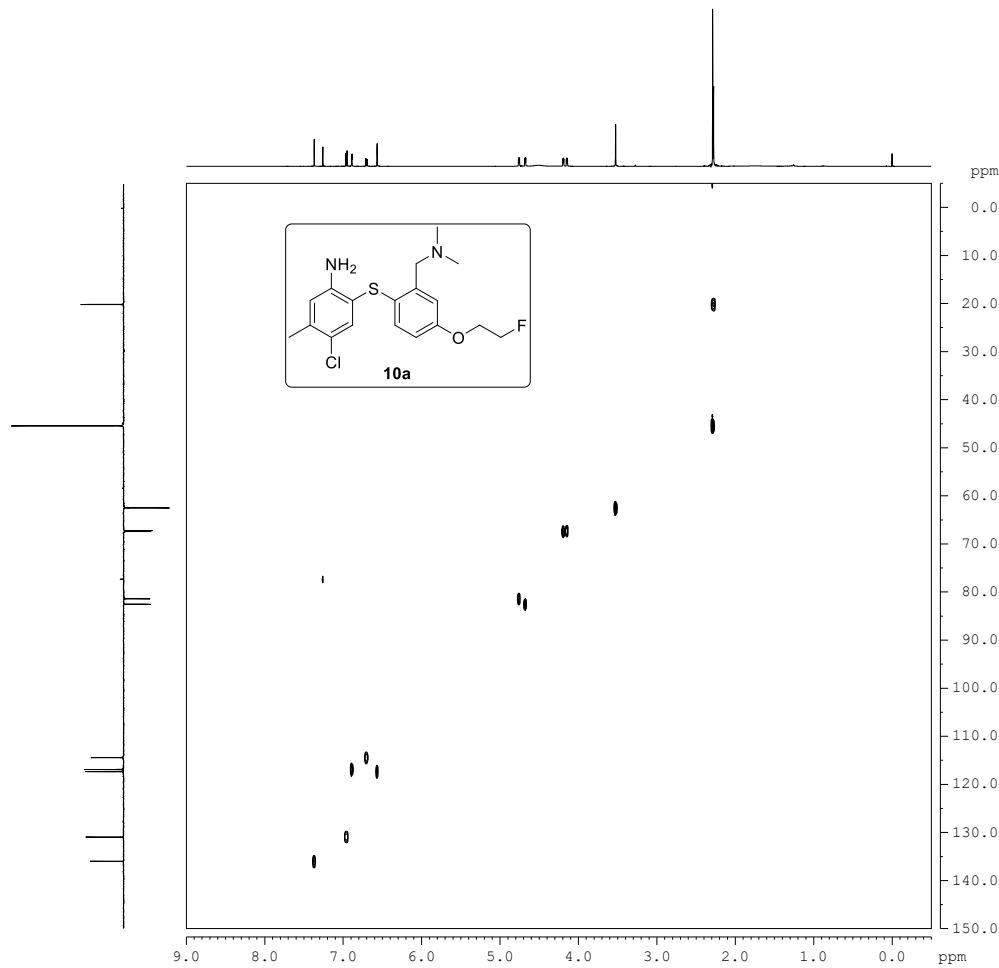

```

Current Data Parameters
NAME      lw-hxy-201307
EXPNO    2
PROCNO   1

F2 - Acquisition Parameters
Date_    20130730
Time     11.46
INSTRUM  spect
PROBHD   5 mm CPDCH 13C
PULPROG  hsqcetgpsig2
TD        65536
SOLVENT  CDCl3
NS        1
DS        4
SWH       8012.820 Hz
FIDRES   3.912510 Hz
AQ        0.1378452 sec
RG        1030
DM        62.400 usec
DE        20.00 usec
TE        30.1 K
CHST2    145.0000000 K
CHST17   -0.5000000
D0        0.0000000 sec
D1        1.5000000 sec
D4        0.00172414 sec
D11       0.03000000 sec
D16       0.00200000 sec
D24       0.0008207 sec
D50       0.00001540 sec

===== CHANNEL f1 =====
NUC1      1H
P1        10.00 usec
P2        20.00 usec
PL1       0 usec
PL2       0 dB
PL1W      16.1019247 W
SFO1      600.0736004 MHz

===== CHANNEL f2 =====
CPDPRG2  gpcp
NUC2      13C
P3        11.20 usec
P4        500.00 usec
P5        2000.00 usec
PCPD2    60.00 usec
PL0       120.00 dB
PL1       60.00 dB
PL12     19.70 dB
PL1W     0 W
PL2W     23.02994347 W
PL12W    0.98241001 W
SFO2     150.9013014 MHz
SF3       13.41 dB
SF4       13.41 dB
SFO3     Crp60,0.5,20.1
SFO4     Crp60,0.5,20.1
SFOAL3   0.500
SFOAL7   0.500
SFOFF3   0 Hz
SFOFF7   0 Hz

----- GRADIENT CHANNEL -----
GPM1     SINE.100
GPM2     SINE.100
GPM3     SINE.100
GPM4     SINE.100
GP1      80.00 %
GP2      20.10 %
GP3      11.00 %
GP4      -5.00 %
P16      1000.00 usec
P19      600.00 usec

F1 - Acquisition parameters
TD        256
SFO1     150.9013 MHz
FIDRES   126.735513 Hz
SW        215.000 ppm
FAMODE   Echo-Antiecho

F2 - Processing parameters
SI        1024
SF        600.0700158 MHz
WDW       QSI
SSB       2
LB        0 Hz
GB        0
PC        1.40

F1 - Processing parameters
SI        1024
SF        150.8876921 MHz
WDW       EM
SSB       2
LB        0 Hz
GB        0

```

Compound 10a,  $^1\text{H}$ - $^{13}\text{C}$  HSQC,  $\text{CDCl}_3$ .

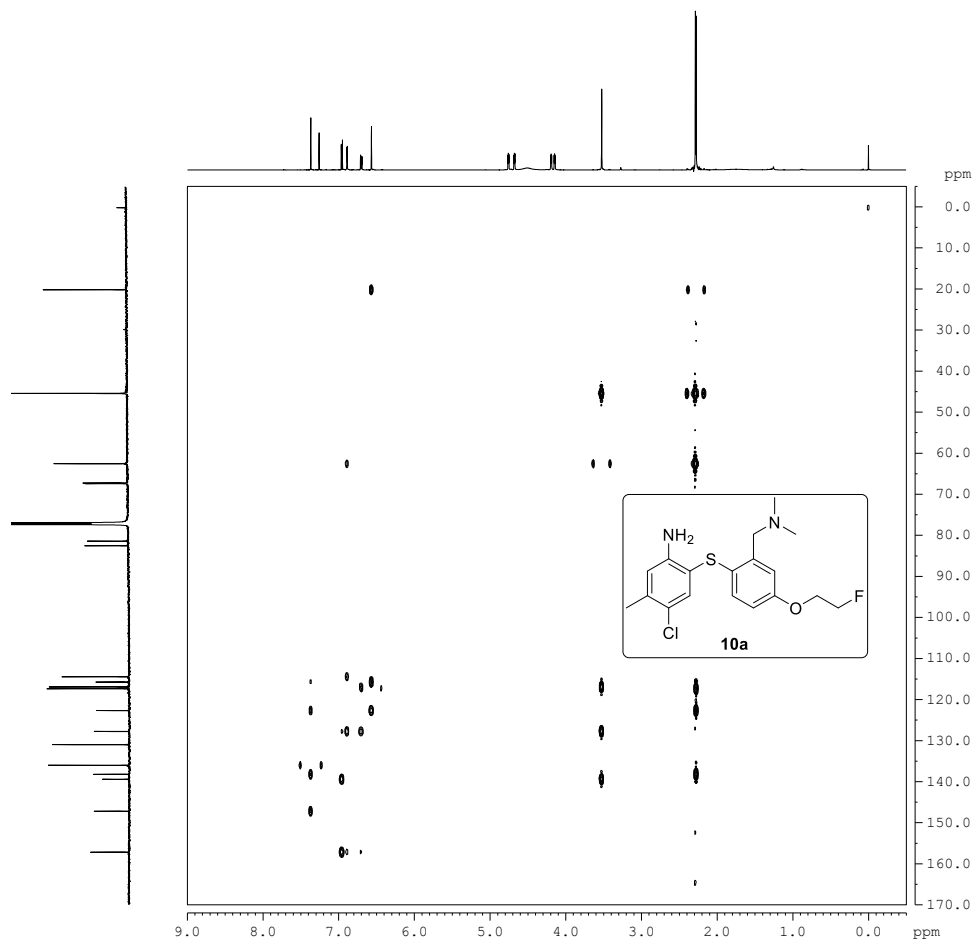

```

Current Data Parameters
NAME      lwh-xys-20130730
EXPNO    6
PROCNO   1

F2 - Acquisition Parameters
Date_    20130730
Time     11.53
INSTRUM  spect
PROBHD   5 mm CPDCH 13c
PULPROG  hmcgppindqr
TD       2048
SOLVENT  cdcl3
NS       2
DS       16
SWH      8012.820 Hz
FIDRES   3.912510 Hz
AQ       0.1278452 sec
RG       2050
DW       62.400 usec
DE       20.00 usec
TE       300.0 K
CNST2    145.0000000
CNST13   8.0000000
DO       0.0000300 sec
D1       1.5000000 sec
D2       0.00344828 sec
D6       0.06250000 sec
D16      0.00020000 sec
IN0      0.00001325 sec

----- CHANNEL f1 -----
NUC1     1H
P1       10.00 usec
P2       20.00 usec
PL1      0 dB
PL1W     16.10119247 W
SFO1     600.0736004 MHz

----- CHANNEL f2 -----
NUC2     13C
P3       11.20 usec
PL2      6.00 dB
PL2W     23.02994347 W
SFO2     150.9058280 MHz

----- GRADIENT CHANNEL -----
GPNAM1   SINE.100
GPNAM2   SINE.100
GPNAM3   SINE.100
GP21     50.00 %
GP22     30.00 %
GP23     40.10 %
P16      1000.00 usec

F1 - Acquisition parameters
TD       256
SFO1     150.9058 MHz
FIDRES   147.368973 Hz
SW       250.000 ppm
FMODE    QF

F2 - Processing parameters
SI       1024
SF       600.0700160 MHz
WDW      SINE
SSB      0
LB       0 Hz
GB       0
PC       1.40

F1 - Processing parameters
SI       1024
MC2      QF
SF       150.8876621 MHz
WDW      TPPI
SSB      0
LB       0 Hz
GB       0

```

Compound 10a,  $^1\text{H}$ - $^{13}\text{C}$  HMBC,  $\text{CDCl}_3$ .

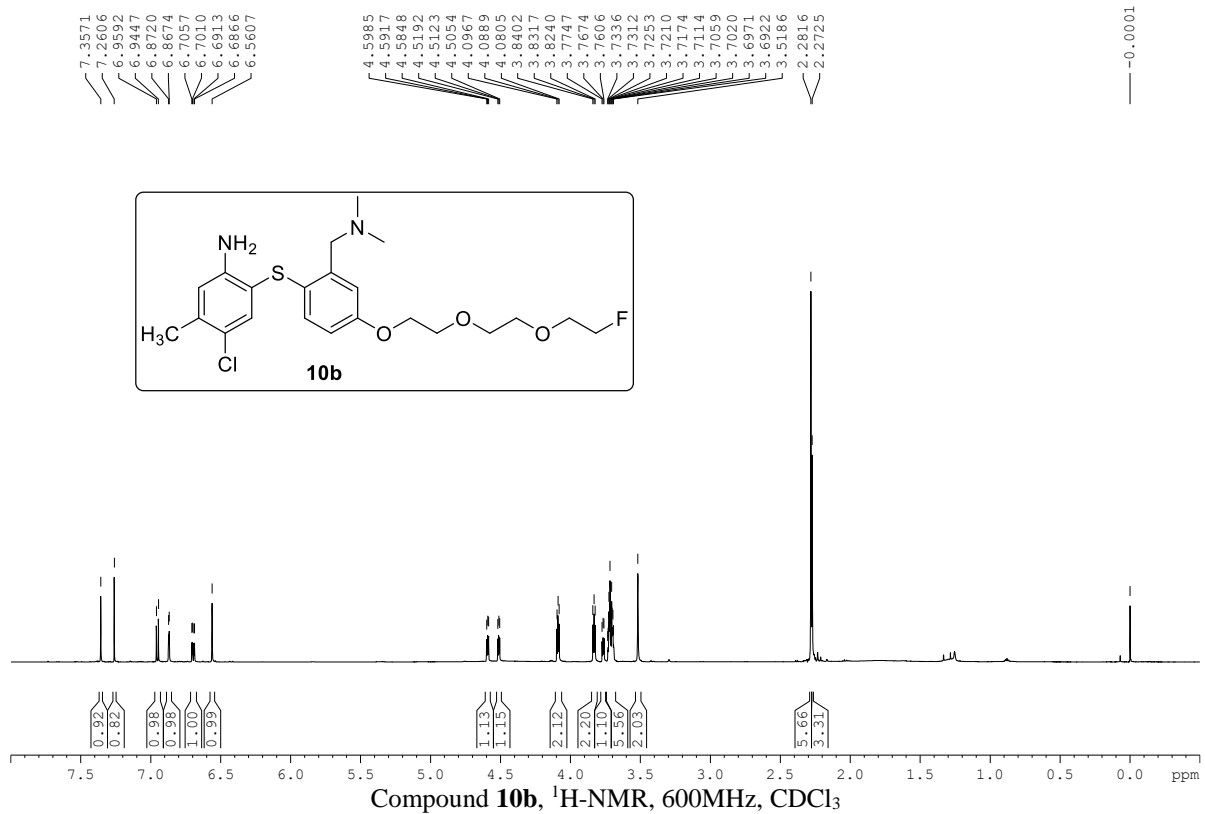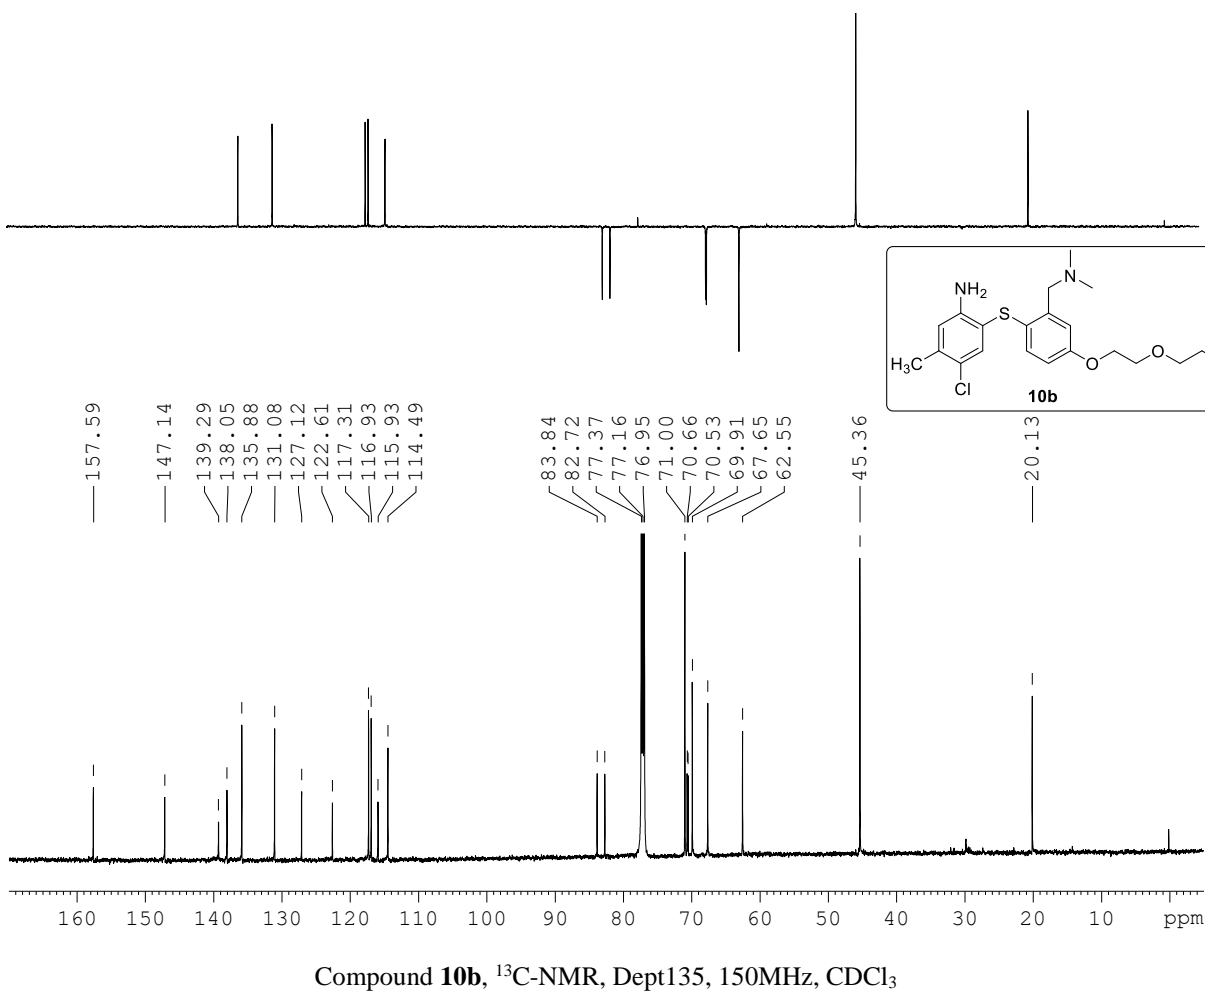

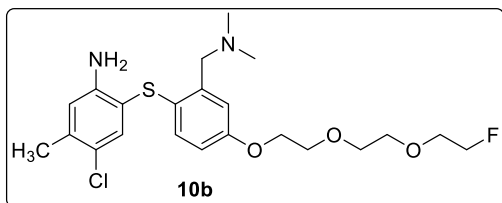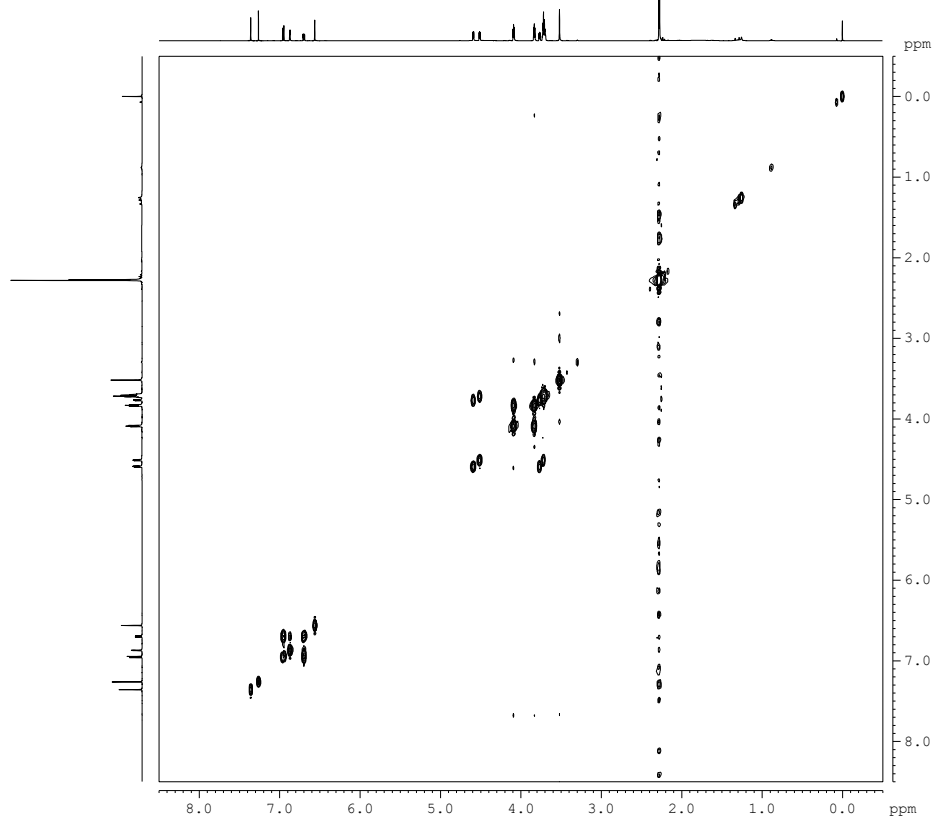

```

Current Data Parameters
NAME lwh-xys-20130730
EXPNO 11
PROCNO 1

F2 - Acquisition Parameters
Date_ 20130730
Time 12.54
INSTRUM spect
PROBHD 5 mm CPDCH 13C
PULPROG cosyppg45
TD 2048
SOLVENT CDCl3
NS 1
DS 16
SWH 8012.820 Hz
FIDRES 3.912510 Hz
AQ 0.1278452 sec
RG 64
DW 62.400 usec
DE 20.00 usec
TE 299.9 K
D0 0.00000300 sec
D1 2.00000000 sec
D13 0.00000400 sec
D16 0.00020000 sec
IN0 0.00012485 sec

===== CHANNEL f1 =====
NUC1 1H
PQ 5.00 usec
P1 10.00 usec
PL1 -0.10 dB
PL1W 16.47623634 W
SF01 600.0736004 MHz

===== GRADIENT CHANNEL =====
GPNAM1 SINE.100
GP21 10.00 %
P16 1000.00 usec

F1 - Acquisition parameters
TD 256
SF01 600.0736 MHz
FIDRES 31.293562 Hz
SW 13.350 ppm
FMODE QF

F2 - Processing parameters
SI 1024
SF 600.0700158 MHz
WDW SINE
SSB 0
LB 0 Hz
GB 0
PC 1.40

F1 - Processing parameters
SI 1024
MC2 QF
SF 600.0700159 MHz
WDW
SSB 0
LB 0 Hz
GB 0

```

Compound **10b**,  $^1\text{H}$ - $^1\text{H}$  COSY,  $\text{CDCl}_3$ .



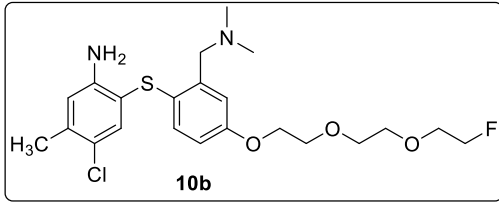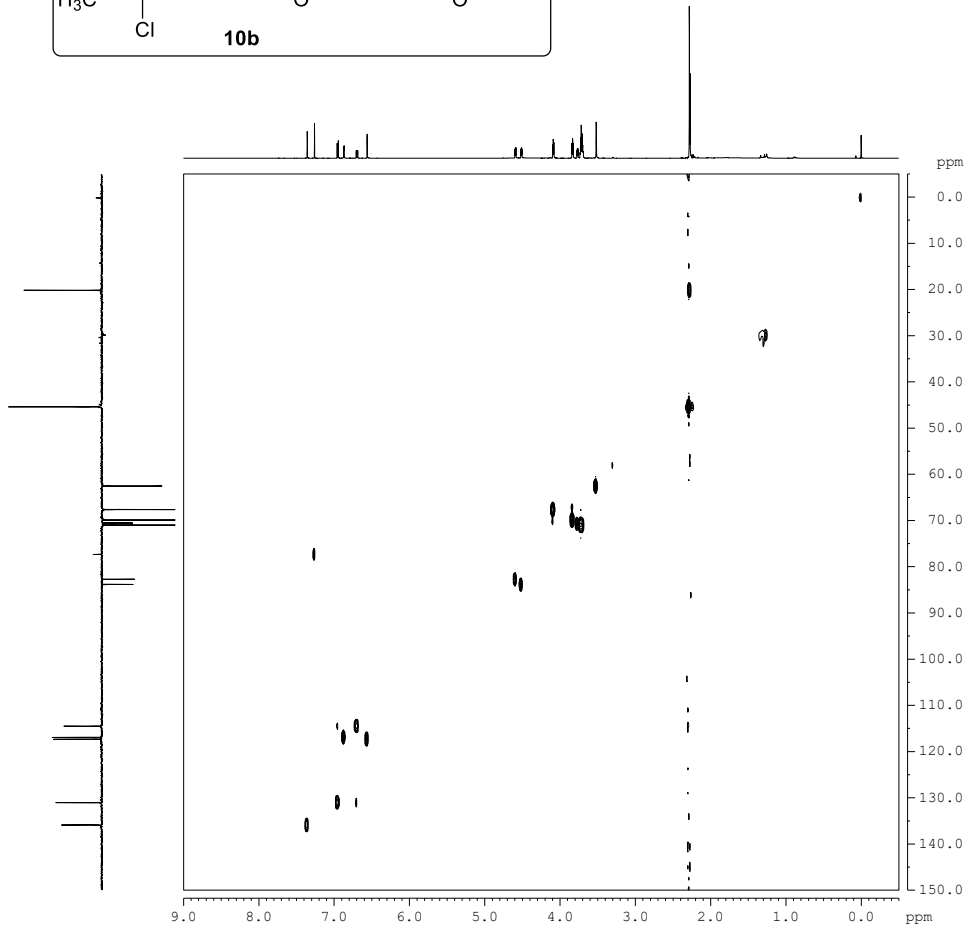

```

Current Data Parameters
NAME 14b-xya-20130730
EXPNO 12
PROCNO 1

F2 - Acquisition Parameters
Date_ 20130730
Time 13.104
INSTRUM spect
PROBHD 5 mm CPDQZ 13C
PULPROG hsqcetppsi2.2
TD 2148
SOLVENT CDCl3
NS 1
DS 16
SWH 8812.420 Hz
FIDRES 3.912510 Hz
AQ 0.1278452 sec
RG 1280
DW 62.400 usec
DE 20.00 usec
TE 299.8 K
CHST2 145.000000
CHST17 -0.500000
D0 0.0000000 sec
D1 1.5000000 sec
D4 0.0017214 sec
D11 0.0300000 sec
D14 0.0000000 sec
D24 0.00086207 sec
TMO 0.00001540 sec

===== CHANNEL f1 =====
NUC1 13C
P1 10.00 usec
P2 20.00 usec
P28 0 usec
P34 -0.10 dB
PL1W 16.47623634 W
SFO1 600.076004 MHz

===== CHANNEL f2 =====
CPDPRG2 94rp
NUC2 1H
P1 12.00 usec
P2 200.00 usec
P34 2000.00 usec
PCPD2 55.00 usec
P30 15.00 dB
PL2 6.00 dB
PL12 19.50 dB
FLOW 0 W
PL1W 21.0294947 W
PL12W 1.0052937 W
SFO2 150.9019314 MHz
SP3 13.41 dB
SP7 13.41 dB
SPHM3 Cnp60,0.5,20.1
SPHM7 Cnp60000,4
SFOAL3 0.500
SFOAL7 0.500
SPOFF3 0 Hz
SPOFF7 0 Hz

===== GRADIENT CHANNEL =====
GRNAM1 SINE.100
GRNAM2 SINE.100
GRNAM3 SINE.100
GRNAM4 SINE.100
GP1 80.00 %
GP2 20.10 %
GP3 11.00 %
GP4 -5.00 %
F14 1000.00 usec
F19 600.00 usec

F1 - Acquisition parameters
TD 256
SFO1 150.9019 MHz
FIDRES 126.733513 Hz
SR 215.000 ppm
FAMODE Echo-Antiecho

F2 - Processing parameters
SI 1024
SF 600.0700122 MHz
WDW Q9INE
GB 0 Hz
PC 1.40

F1 - Processing parameters
SI 1024
MC2 echo-antiecho
SF 150.9076897 MHz
WDW SIN
SSB 0 Hz
LB 0 Hz
GB 0

```

Compound **10b**,  $^1\text{H}$ - $^{13}\text{C}$  HSQC,  $\text{CDCl}_3$ .

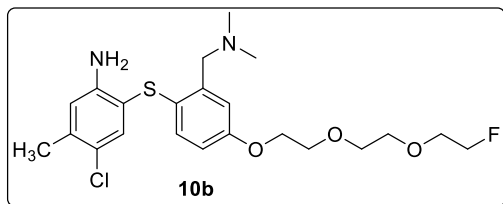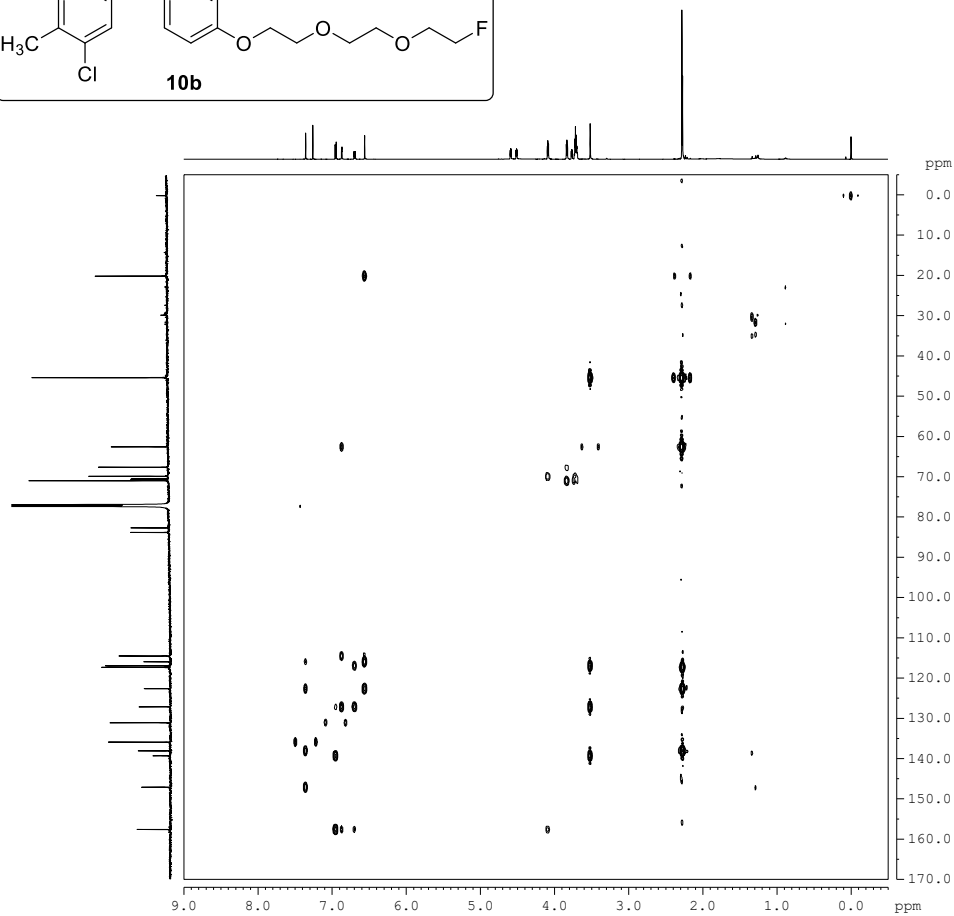

```

Current Data Parameters
NAME lwh-xys-20130730
EXPNO 13
PROCNO 1

F2 - Acquisition Parameters
Date_ 20130730
Time 13.12
INSTRUM spect
PROBHD 5 mm CPDCH 13C
PULPROG hmbcgp1pndqf
TD 2048
SOLVENT CDCl3
DS 2
NS 16
SWH 8012.820 Hz
FIDRES 3.912510 Hz
AQ 0.1278452 sec
RG 2050
DW 62.400 usec
DE 20.00 usec
TE 300.1 K
CNS1 145.000000
CNS13 8.000000
DO 0.0000300 sec
D1 1.5000000 sec
D2 0.00344828 sec
D6 0.0625000 sec
D16 0.0002000 sec
IN0 0.00001325 sec

----- CHANNEL f1 -----
NUC1 1H
P1 10.00 usec
P2 20.00 usec
PL1 -0.10 dB
PL1W 16.47623634 W
SFO1 600.0736004 MHz

----- CHANNEL f2 -----
NUC2 13C
P3 12.00 usec
PL2 6.00 dB
PL2W 23.02994347 W
SFO2 150.9058280 MHz

----- GRADIENT CHANNEL -----
GPNAM1 SINE.100
GPNAM2 SINE.100
GPNAM3 SINE.100
GP21 50.00 %
GP22 50.00 %
GP23 40.10 %
P16 1000.00 usec

F1 - Acquisition parameters
TD 256
SFO1 150.9058 MHz
FIDRES 147.368973 Hz
SW 250.000 ppm
F0MODE QF

F2 - Processing parameters
SI 1024
SF 600.0700155 MHz
WDW SINE
SSB 0
LB 0 Hz
GB 0
PC 1.40

F1 - Processing parameters
SI 1024
MC2 QF
SF 150.8876867 MHz
WDW States-TPPI
SSB 0
LB 0 Hz
GB 0

```

Compound **10b**,  $^1\text{H}$ - $^{13}\text{C}$  HMBC,  $\text{CDCl}_3$ .

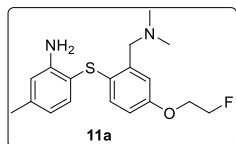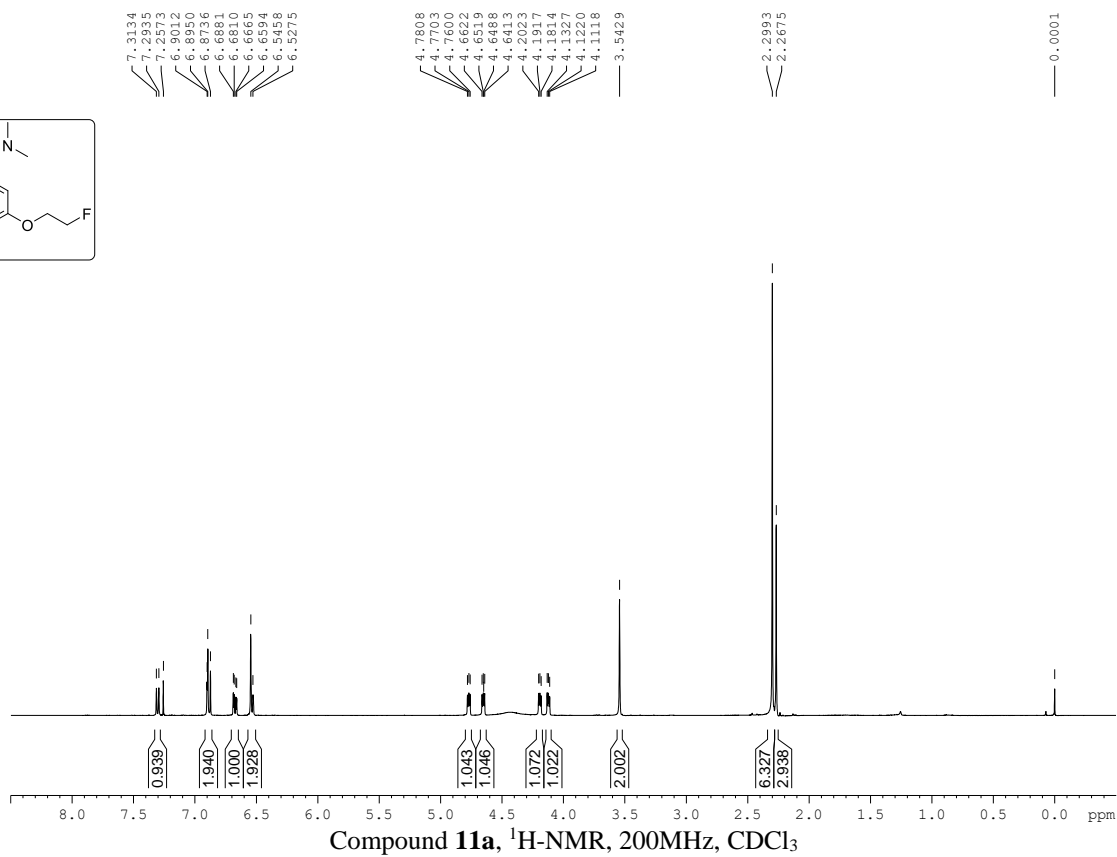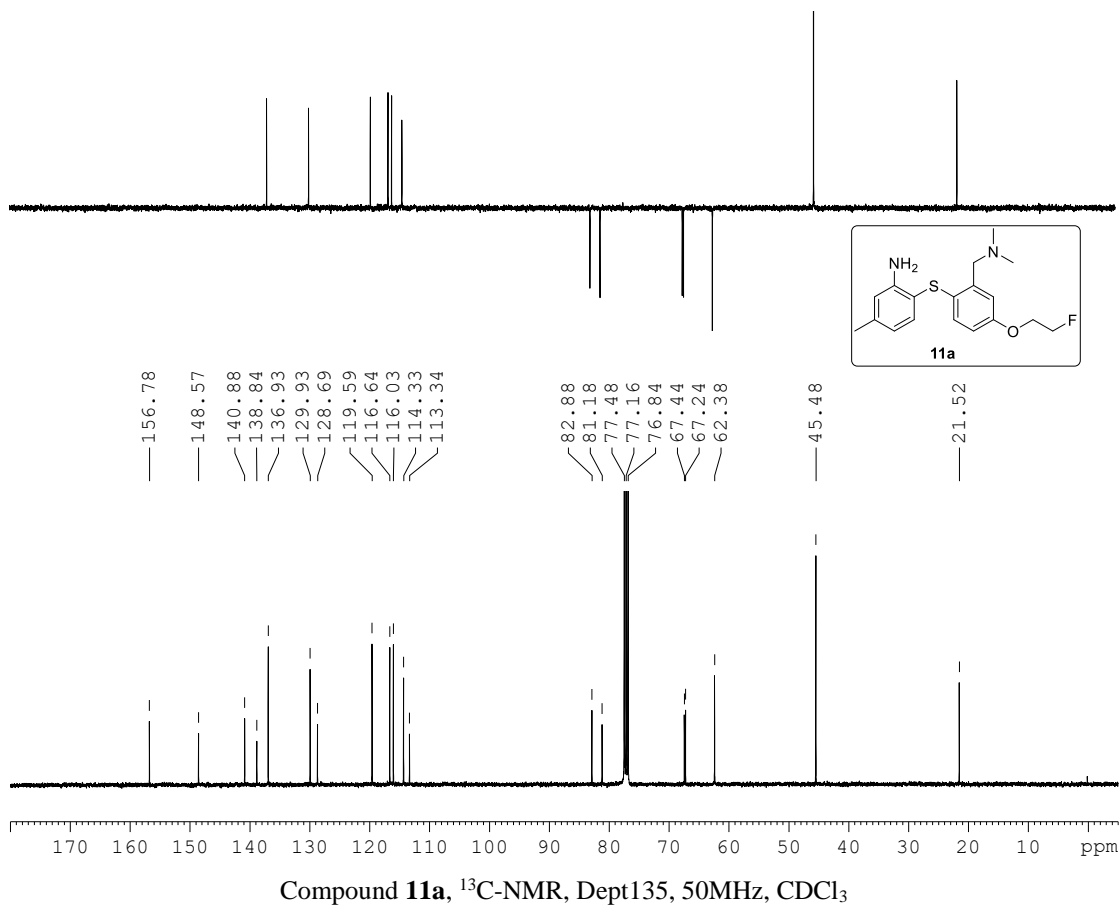

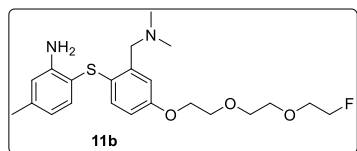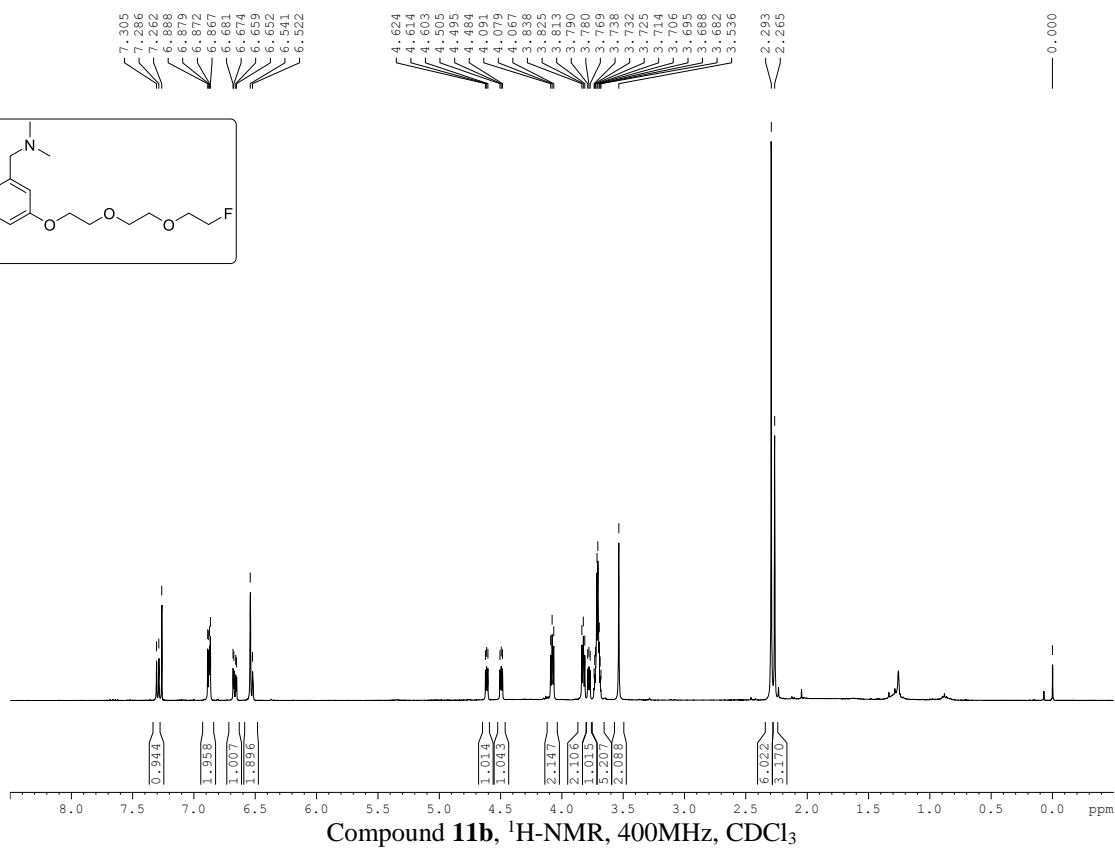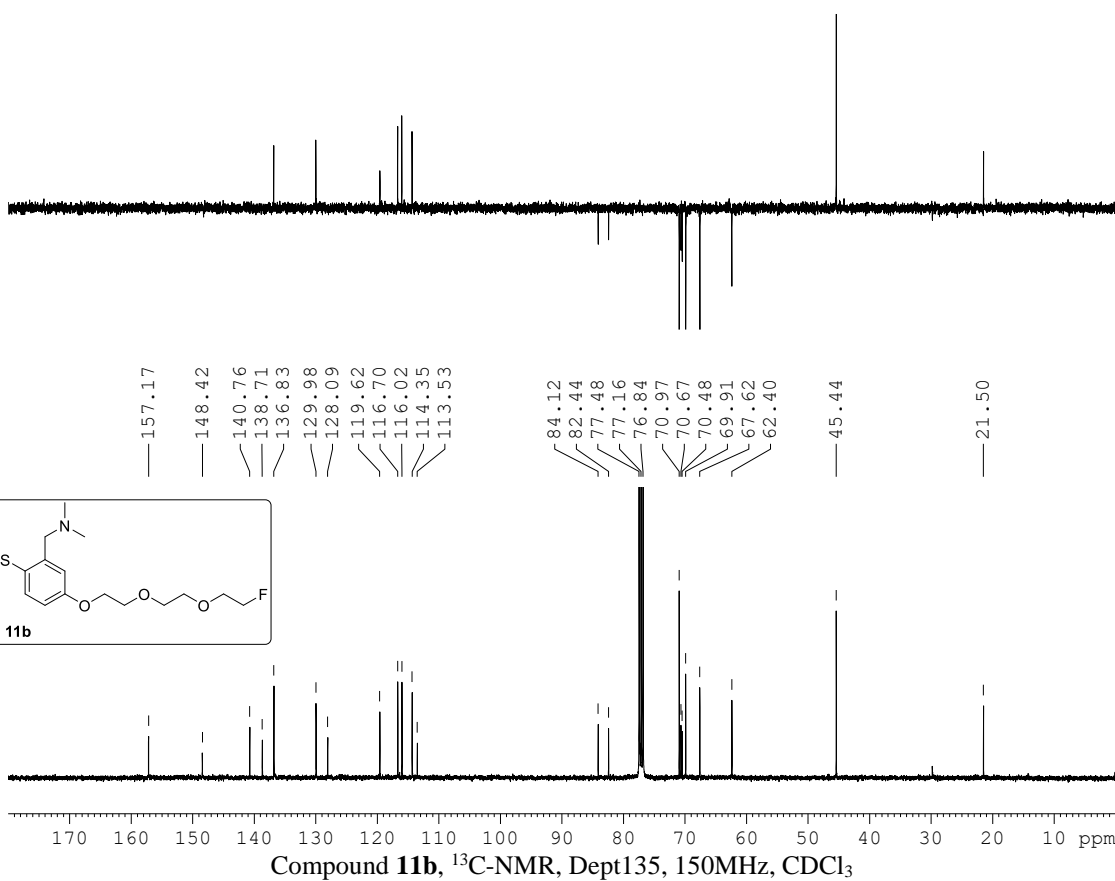

## Instrumentation

GC studies were conducted using a Shimadzu<sup>®</sup> 2014 gas chromatograph. The GC was operated in split less mode with a carrier gas (N<sub>2</sub> gas) flow rate of 1.0 ml/min. The GC injector was maintained at 250°C. The FID detector was maintained at 300°C. The column temperature program consisted of an initial temperature of 100°C for 3 min, ramped up to 300°C at a rate of 20°C/min, and hold at 300°C for 10 min. The total GC run time was 23 min. The crude samples were extracted into ethyl acetate with 10% sodium hydroxide aqueous solution and the samples in ethyl acetate were introduced via the injector. The chromatographic separations of the chlorination test samples were carried out on a 30 m × 0.25 mm i.d. column coated with 0.25 μm 5% phenyl-95% dimethylpolysiloxane (DB-5) using the above-mentioned time program.

LC-MS studies were performed on an Agilent 1100 system consisting of an Agilent G1313A autosampler, an Agilent G1311A quaternary pump, and an Agilent DAD G1315B and an Esquire 2000 mass spectrometer. The mass spectrometer was operated on electron spray ionization (ESI) mode. Sampled 100 μL of reaction mixture, evaporated to dryness and partitioned with 10% NaOH and EA. The EA layer was separated, filtered with MgSO<sub>4</sub> and dried. The crude sample was then dissolved with HPLC grade ACN. The sample solution (10 μL) was eluted using 80% ACN in 10 mM ammonium formate (pH = 7.0 with ammonium hydroxide) as the mobile phase with the flow rate of 1.0 mL/min on the Gemini C18 column (250 × 4.6 mm, 5ml, Phenomenex). The LC-MS system was controlled by HyStar software and the area% value of chemical constituents P[M+1]<sup>+</sup>, *p*-Cl-BP[M+Cl]<sup>+</sup>, and *p*-EtO-BP [M+OEt]<sup>+</sup> were calculated based on the UV absorption areas according to MS signals at the wavelength of 254 nm in all reaction.

**Table 6 Retention time and low-resolution mass results of products in reductive halogenation<sup>a</sup>**

| Products         | NHOHP                                                                             | <i>p</i> -MeOP                                                                    | P                                                                                 | <i>p</i> -EtOP                                                                     | <i>p</i> - <i>i</i> -PrOP                                                           |
|------------------|-----------------------------------------------------------------------------------|-----------------------------------------------------------------------------------|-----------------------------------------------------------------------------------|------------------------------------------------------------------------------------|-------------------------------------------------------------------------------------|
| Structure        | 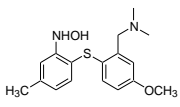 |  |  |  |  |
| Rt (min)         | 3.2                                                                               | 3.9                                                                               | 4.4                                                                               | 4.6                                                                                | 5.0                                                                                 |
| Mass, <i>m/z</i> | 319/274                                                                           | 333/288                                                                           | 303/258                                                                           | 347/302                                                                            | 361                                                                                 |

  

| Products         | SM                                                                                | <i>p</i> -CIP                                                                     | <i>p</i> -BrP                                                                     | <i>o</i> -CIP                                                                      | <i>o</i> -BrP                                                                       |
|------------------|-----------------------------------------------------------------------------------|-----------------------------------------------------------------------------------|-----------------------------------------------------------------------------------|------------------------------------------------------------------------------------|-------------------------------------------------------------------------------------|
| Structure        |  |  |  |  |  |
| Rt (min)         | 5.4                                                                               | 5.8                                                                               | 6.2                                                                               | 7.0                                                                                | 7.7                                                                                 |
| Mass, <i>m/z</i> | 333                                                                               | 337/292                                                                           | 381/336                                                                           | 337/292                                                                            | 381/336                                                                             |

<sup>a</sup>NHOHP, *o*-CIP were neglected due to <5 (area %) under 254 nm in LC, *p*-*i*-PrOP related experiment was not shown in the paper.

# LC and GC Report of compound 1c under reductive-halogenation condition.

## Ic Scheme

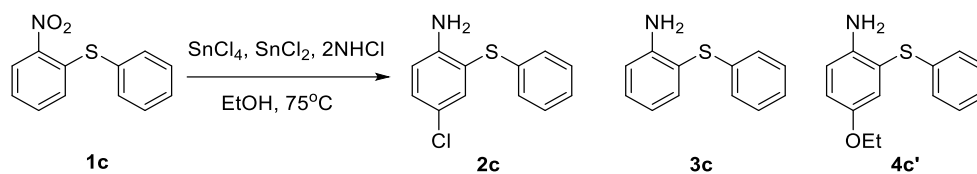

| Name         | 2c       | 3c       | 4c'      |
|--------------|----------|----------|----------|
| Extract mass | 235.0222 | 201.0612 | 245.0874 |
| LC-RT        | 5.83 min | 4.87 min | 5.02 min |
| GC-RT        | 11.7 min | 10.5 min | 12.0 min |

## Chromatogram

Report for "H-S-Ph\_32\_01\_5673"  
 Printed: 15:25:47 08/19/14 Computer: 1AP05 User: default

### Report for "H-S-Ph\_32\_01\_5673"

#### Chromatogram File:

D:\CHEM32\1\DATA\H-S-Ph\_32\_01\_5673.d\H-S-Ph\_32\_01\_5673.unt

Created on: 8/19/2014 at: 03:14:51 pm  
 on Windows system: 1AP05 by user: TOP-User  
 with HyStar Version 3.2.44.0  
 Operator: default, Laboratory:

Total Chromatogram Runtime: 15.02 min

Signal 1: DAD (254)

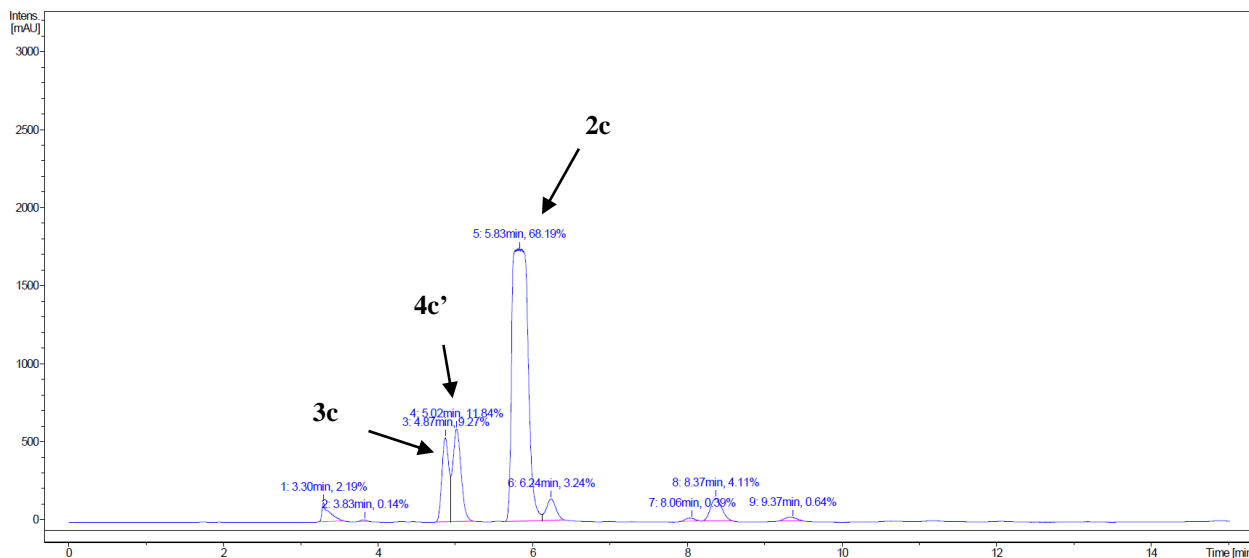

Analysis Date & Time : 2014/8/12 上午 11:57:58  
 User Name : Lab 1336  
 Vial# : 1  
 Sample Name : H-S-Ph  
 Sample ID : H-S-Ph  
 Injection Volume : 1 uL  
 Data Name : D:\1336\HYH\HYH-20140812\H-S-Ph.gcd  
 Method Name : D:\1336\HYH\HYH-20140401 test-1.gcm  
 \$EndIf\$

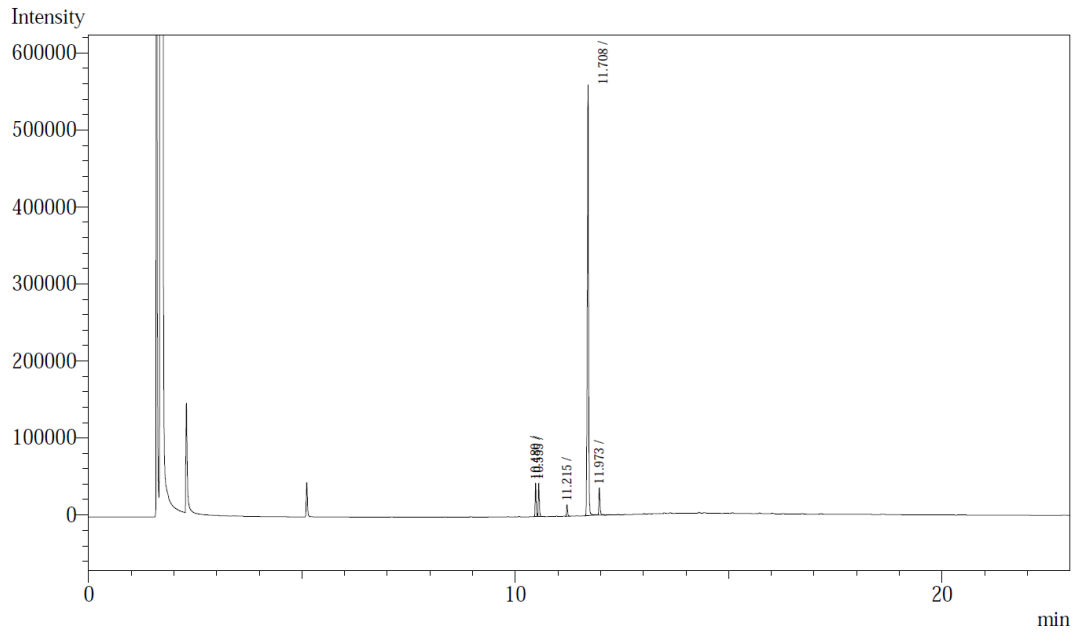

| Peak#        | Ret.Time | Area           | Height        | Area%           |
|--------------|----------|----------------|---------------|-----------------|
| 1            | 10.480   | 71009          | 43612         | 5.3260          |
| 2            | 10.555   | 72273          | 42932         | 5.4207          |
| 3            | 11.215   | 24804          | 15080         | 1.8604          |
| 4            | 11.708   | 1101351        | 557296        | 82.6055         |
| 5            | 11.973   | 63829          | 35194         | 4.7874          |
| <b>Total</b> |          | <b>1333266</b> | <b>694114</b> | <b>100.0000</b> |

← **3c** (points to Peak 2)  
 ← **2c** (points to Peak 4)  
 ← **4c'** (points to Peak 5)





# LC Report of compound 1e under reduction-halogenation condition.

## 1e Scheme

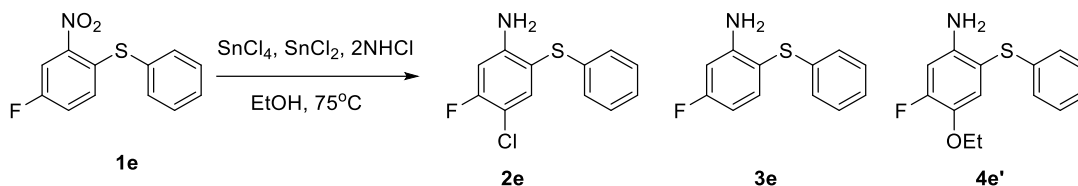

| Name         | 2e       | 3e       | 4e'      |
|--------------|----------|----------|----------|
| Extract mass | 253.0128 | 219.0518 | 263.0780 |
| LC-RT        | 6.61 min | 5.37 min | 5.55 min |
| GC-RT        | ND       | ND       | ND       |

## Chromatogram

Report for "F reduction\_12\_01\_5365"  
 Printed: 13:48:09 12/01/14 Computer:1AP05 User:default

### Report for "F reduction\_12\_01\_5365"

#### Chromatogram File:

D:\CHEM32\1\DATA\lab1336\hyh\HYH-20140523 LC-MS\F reduction\_12\_01\_5365.d\F reduction\_12\_01\_5365.unt

Created on: 5/23/2014 at: 06:55:17 pm  
 on Windows system: 1AP05 by user: TOF-User  
 with HyStar Version 3.2.44.0  
 Operator: default, Laboratory:

Total Chromatogram Runtime: 10.02 min

Signal 1: DAD (254)

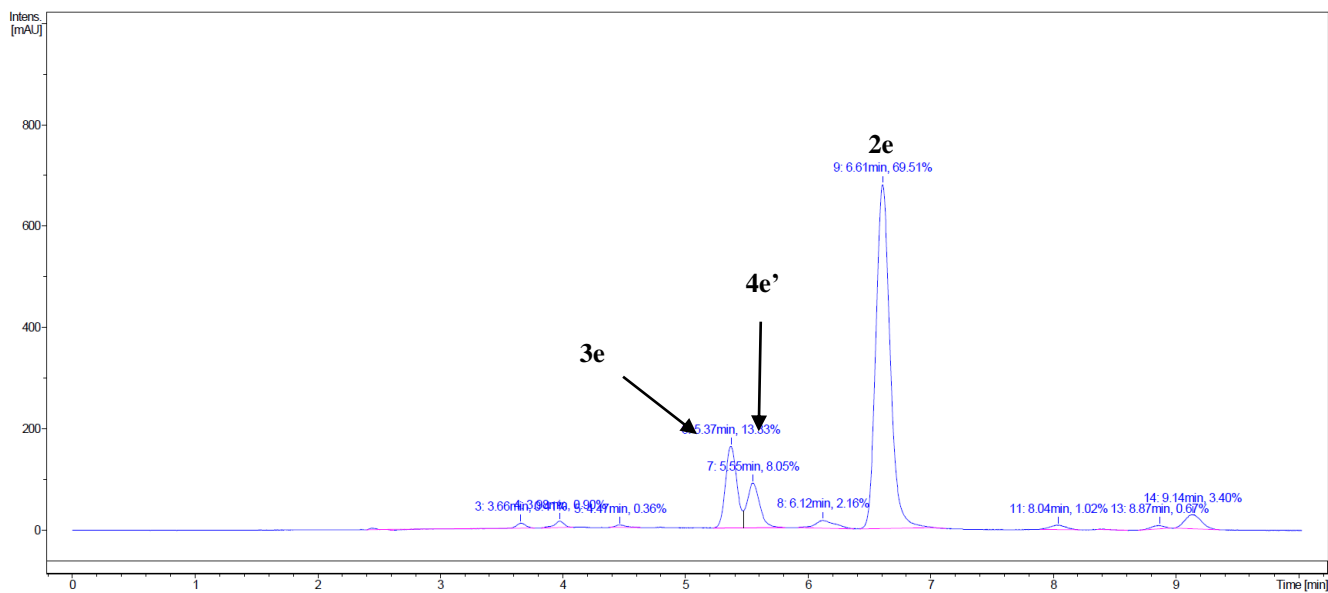

# LC and GC Report of compound 1f under reduction-halogenation condition.

## If Scheme

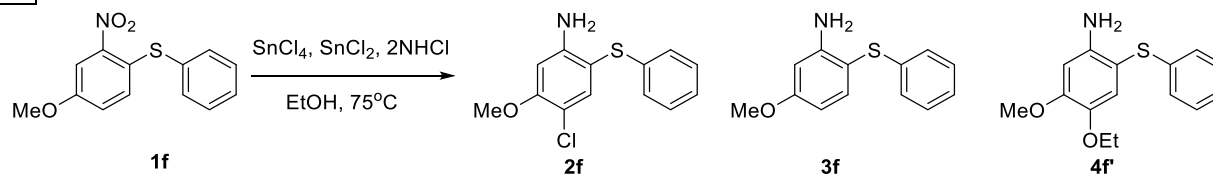

| Name         | <b>2f</b> | <b>3f</b> | <b>4f'</b> |
|--------------|-----------|-----------|------------|
| Extract mass | 265.0328  | 231.0718  | 275.0980   |
| LC-RT        | 5.32 min  | 3.54 min  | 4.61 min   |
| GC-RT        | 14.45 min | 13.12 min | 14.22 min  |

## Chromatogram

Report for "OMe\_22\_01\_5529"  
 Printed: 14:41:23 07/17/14 Computer:1AP05 User:default

### Report for "OMe\_22\_01\_5529"

#### Chromatogram File:

D:\CHEM32\1\DATA\lab1336\hyh\HYH 20140717 LC-MS\OMe\_22\_01\_5529.d\OMe\_22\_01\_5529.unt

Created on: 7/17/2014 at: 02:16:51 pm  
 on Windows system: 1AP05 by user: TOP-User  
 with HyStar Version 3.2.44.0  
 Operator: default, Laboratory:

Total Chromatogram Runtime: 10.02 min

Signal 1: DAD (254)

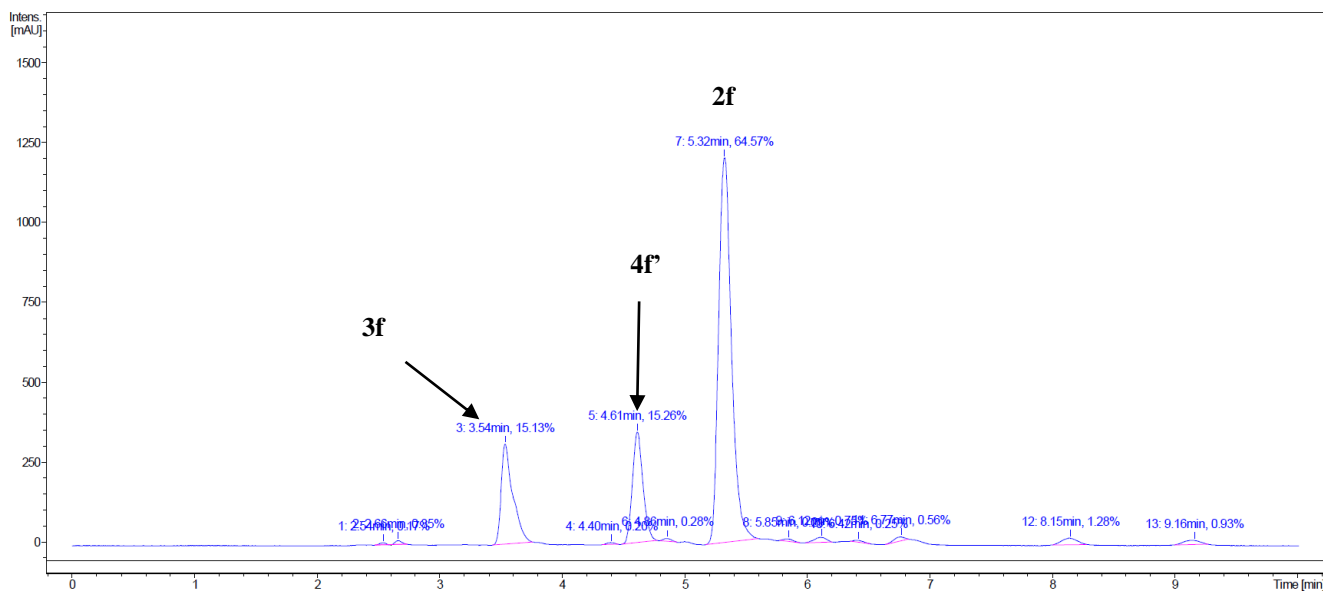

Analysis Date & Time : 2014/7/24 下午 02:01:35  
 User Name : Lab 1336  
 Vial# : 1  
 Sample Name : OMe red  
 Sample ID : OMe red  
 Injection Volume : 1 uL  
 Data Name : D:\1336\HYH\20140724\OMe red.gcd  
 Method Name : D:\1336\HYH\HYH-20140401.gcm  
 \$EndIf\$

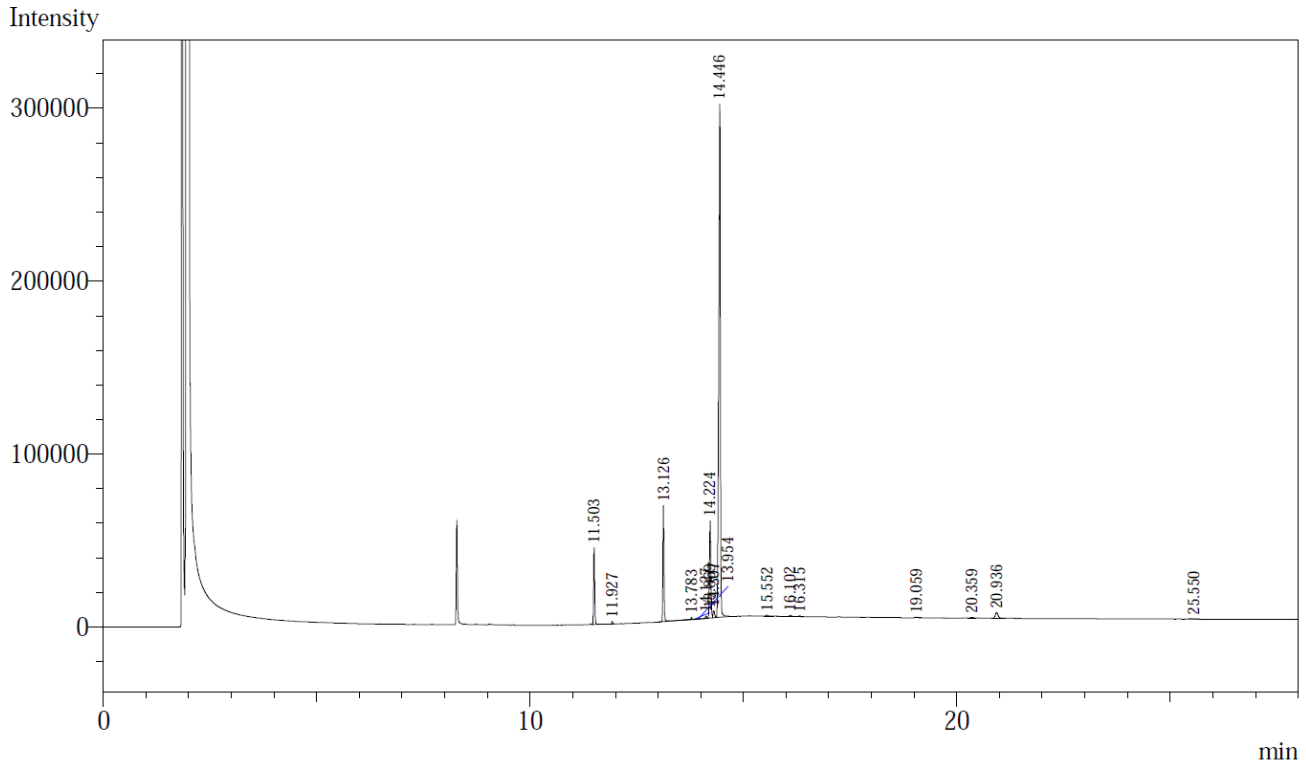

| Peak#        | Ret.Time | Area           | Height        | Area%           |            |
|--------------|----------|----------------|---------------|-----------------|------------|
| 1            | 11.503   | 76765          | 43901         | 6.6628          |            |
| 2            | 11.927   | 2675           | 1534          | 0.2322          |            |
| 3            | 13.126   | 117539         | 66705         | 10.2018         | <b>3f</b>  |
| 4            | 13.783   | 2798           | 1146          | 0.2429          |            |
| 5            | 13.869   | 1168           | 352           | 0.1014          |            |
| 6            | 13.954   | 1174           | 523           | 0.1019          |            |
| 7            | 14.127   | 2663           | 1284          | 0.2311          |            |
| 8            | 14.224   | 126900         | 55886         | 11.0142         | <b>4f'</b> |
| 9            | 14.307   | 10480          | 4104          | 0.9096          |            |
| 10           | 14.446   | 784557         | 295259        | 68.0954         | <b>2f</b>  |
| 11           | 15.552   | 1952           | 669           | 0.1694          |            |
| 12           | 16.102   | 1971           | 651           | 0.1711          |            |
| 13           | 16.315   | 1394           | 518           | 0.1210          |            |
| 14           | 19.059   | 1404           | 346           | 0.1219          |            |
| 15           | 20.359   | 2266           | 430           | 0.1967          |            |
| 16           | 20.936   | 15403          | 3389          | 1.3369          |            |
| 17           | 25.550   | 1034           | 124           | 0.0898          |            |
| <b>Total</b> |          | <b>1152143</b> | <b>476821</b> | <b>100.0000</b> |            |



Analysis Date & Time : 2014/7/24 下午 03:17:03  
 User Name : Lab 1336  
 Vial# : 1  
 Sample Name : CF3 red  
 Sample ID : CF3 red  
 Injection Volume : 1 uL  
 Data Name : D:\1336\HYH\20140724\CF3 red.gcd  
 Method Name : D:\1336\HYH\HYH-20140401.gcm  
 \$EndIf\$

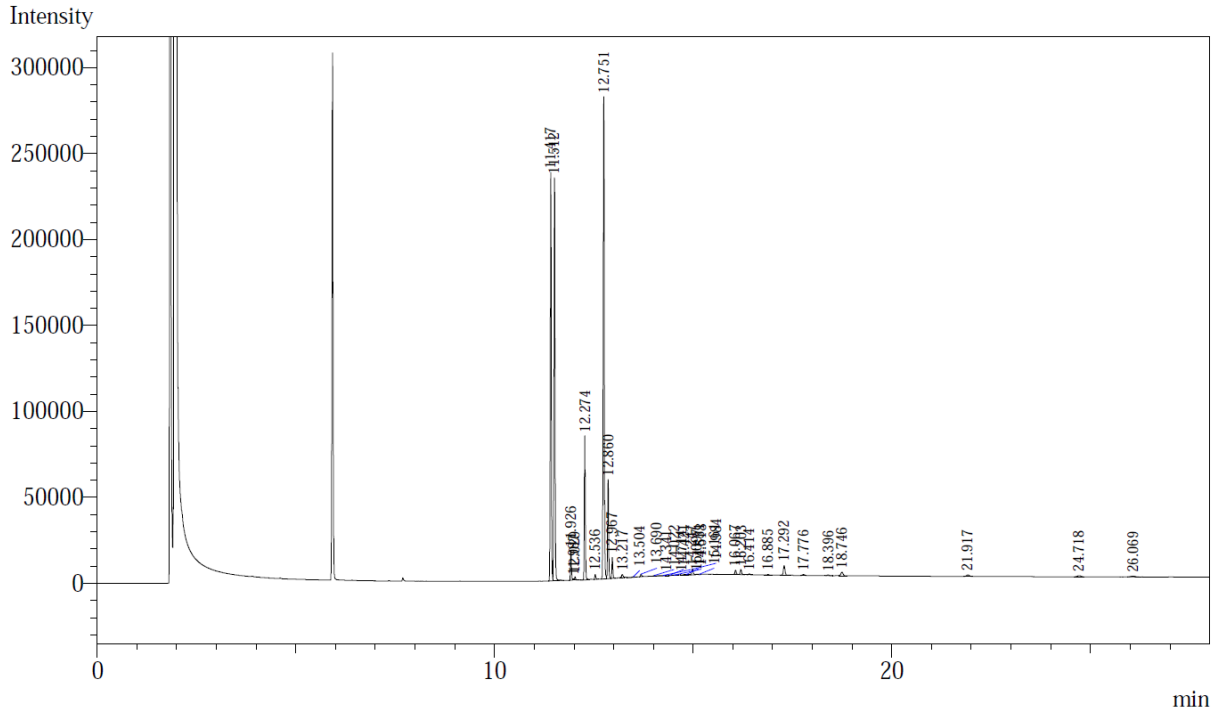

| Peak# | Ret.Time | Area   | Height | Area%   |            |
|-------|----------|--------|--------|---------|------------|
| 1     | 11.417   | 412300 | 234967 | 23.4100 |            |
| 2     | 11.512   | 426186 | 230945 | 24.1985 | <b>3g</b>  |
| 3     | 11.926   | 28440  | 17004  | 1.6148  |            |
| 4     | 11.987   | 1437   | 811    | 0.0816  |            |
| 5     | 12.029   | 3580   | 1972   | 0.2032  |            |
| 6     | 12.274   | 144288 | 81902  | 8.1926  | <b>4g'</b> |
| 7     | 12.536   | 5363   | 2798   | 0.3045  |            |
| 8     | 12.751   | 529052 | 276154 | 30.0391 | <b>2g</b>  |
| 9     | 12.860   | 98826  | 57066  | 5.6113  |            |
| 10    | 12.967   | 21577  | 12137  | 1.2251  |            |
| 11    | 13.217   | 5938   | 2005   | 0.3371  |            |
| 12    | 13.504   | 1496   | 487    | 0.0850  |            |
| 13    | 13.690   | 2976   | 1474   | 0.1690  |            |
| 14    | 14.022   | 1361   | 361    | 0.0773  |            |
| 15    | 14.247   | 2812   | 238    | 0.1596  |            |
| 16    | 14.341   | 1286   | 290    | 0.0730  |            |
| 17    | 14.421   | 1059   | 293    | 0.0601  |            |
| 18    | 14.518   | 2998   | 290    | 0.1702  |            |
| 19    | 14.714   | 2212   | 331    | 0.1256  |            |
| 20    | 14.831   | 1295   | 300    | 0.0735  |            |
| 21    | 14.984   | 9629   | 3289   | 0.5468  |            |
| 22    | 15.097   | 1052   | 268    | 0.0598  |            |
| 23    | 15.161   | 1003   | 292    | 0.0569  |            |
| 24    | 16.067   | 6036   | 2458   | 0.3427  |            |
| 25    | 16.203   | 7738   | 3054   | 0.4393  |            |
| 26    | 16.414   | 1503   | 578    | 0.0853  |            |
| 27    | 16.885   | 1035   | 335    | 0.0587  |            |
| 28    | 17.292   | 15998  | 5513   | 0.9083  |            |
| 29    | 17.776   | 1658   | 562    | 0.0942  |            |
| 30    | 18.396   | 1414   | 412    | 0.0803  |            |
| 31    | 18.746   | 7445   | 2117   | 0.4227  |            |

# LC Report of compound 1h under reduction-halogenation condition.

## 1h Scheme

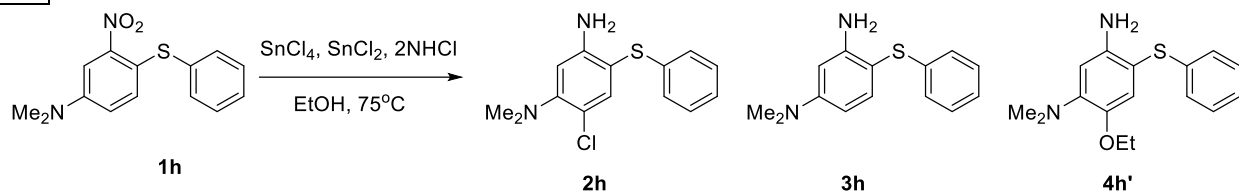

| Name         | 2h       | 3h       | 4h'      |
|--------------|----------|----------|----------|
| Extract mass | 278.0644 | 244.1034 | 288.1296 |
| LC-RT        | 5.64 min | 6.66 min | 5.95 min |
| GC-RT        | ND       | ND       | ND       |

## Chromatogram

Report for "Me2N reduction\_11\_01\_5364"  
 Printed: 13:45:56 12/01/14 Computer: 1AP05 User: default

### Report for "Me2N reduction\_11\_01\_5364"

#### Chromatogram File:

D:\CHEM32\1\DATA\lab1336\hyh\HYH-20140523 LC-MS\Me2N reduction\_11\_01\_5364.d\Me2N reduction\_11\_01\_5364.unt

Created on: 5/23/2014 at: 06:42:40 pm  
 on Windows system: 1AP05 by user: TOP-User  
 with HyStar Version 3.2.44.0  
 Operator: default, Laboratory:

Total Chromatogram Runtime: 10.02 min

Signal 1: DAD (254)

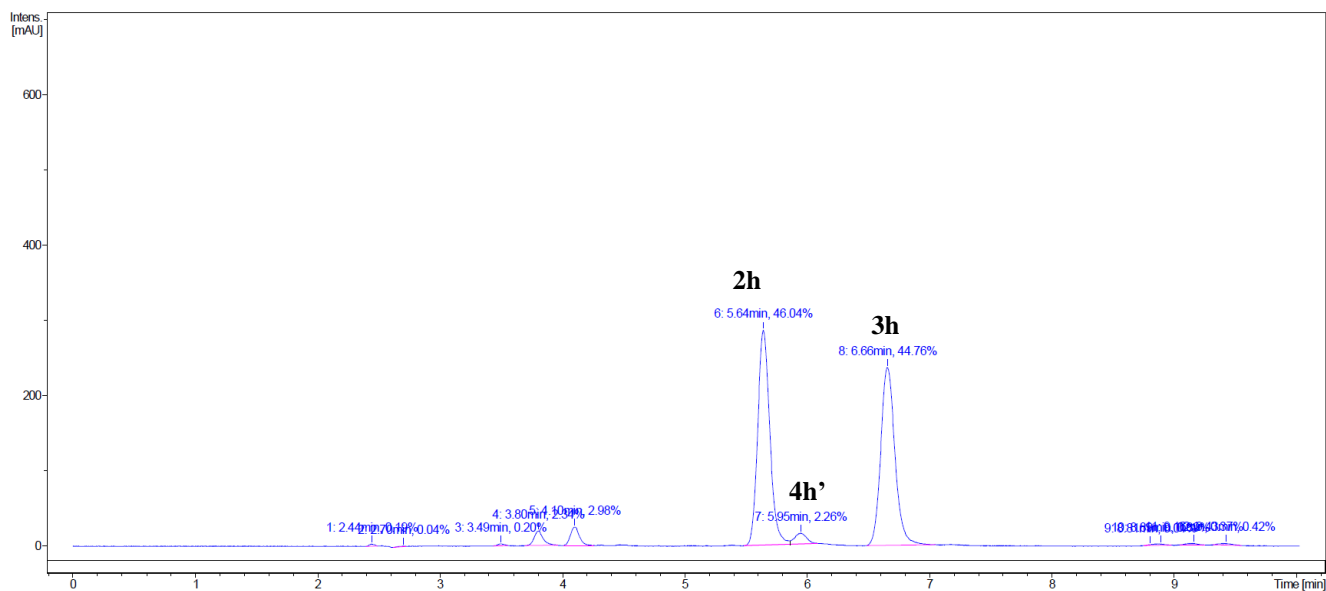

# GC Report of compound **1i** under reduction-halogenation condition.

## 1i Scheme

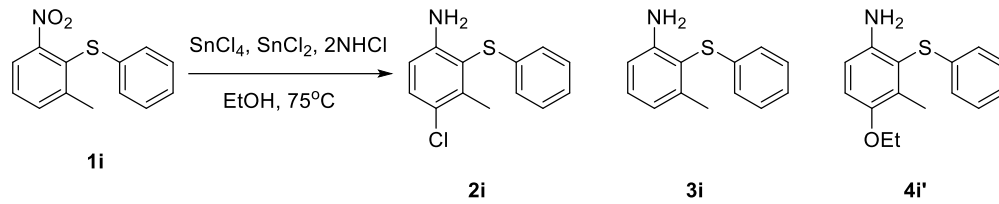

| Name         | <b>2i</b> | <b>3i</b> | <b>4i'</b> |
|--------------|-----------|-----------|------------|
| Extract mass | 249.0379  | 215.0769  | 259.1031   |
| LC-RT        | ND        | ND        | ND         |
| GC-RT        | 13.69 min | 12.02 min | 13.45 min  |

Analysis Date & Time : 2014/9/9 下午 06:29:42  
 User Name : Lab 1336  
 Vial# : 1  
 Sample Name : 3-Me 2-S 1NO2 coupling reaction  
 Sample ID : 3-Me 2-S 1NO2 coupling reaction  
 Injection Volume : 1 uL  
 Data Name : D:\1336\HYH\20140909\3-Me 2-S 1NO2 coupling reaction.gcd  
 Method Name : D:\1336\HYH\HYH-20140818 for chlorination.gcm  
 \$EndIf\$

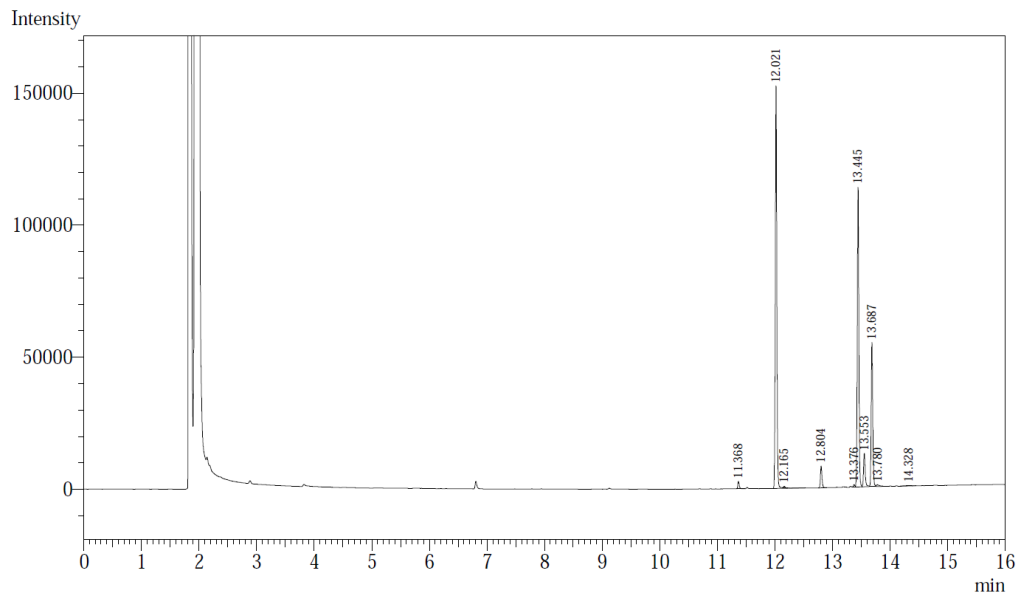

| Peak#        | Ret.Time | Area          | Height        | Area%           |            |
|--------------|----------|---------------|---------------|-----------------|------------|
| 1            | 11.368   | 4886          | 2759          | 0.7629          |            |
| 2            | 12.021   | 274339        | 150521        | 42.8350         | <b>3i</b>  |
| 3            | 12.165   | 1019          | 597           | 0.1592          |            |
| 4            | 12.804   | 15299         | 8180          | 2.3888          |            |
| 5            | 13.376   | 1675          | 978           | 0.2615          |            |
| 6            | 13.445   | 212539        | 111537        | 33.1856         | <b>4i'</b> |
| 7            | 13.553   | 25525         | 12419         | 3.9854          |            |
| 8            | 13.687   | 100831        | 54053         | 15.7436         | <b>2i</b>  |
| 9            | 13.780   | 2340          | 636           | 0.3653          |            |
| 10           | 14.328   | 2002          | 232           | 0.3126          |            |
| <b>Total</b> |          | <b>640455</b> | <b>341912</b> | <b>100.0000</b> |            |





# GC Report of compound 1k under reduction-halogenation condition.

## 1k Scheme

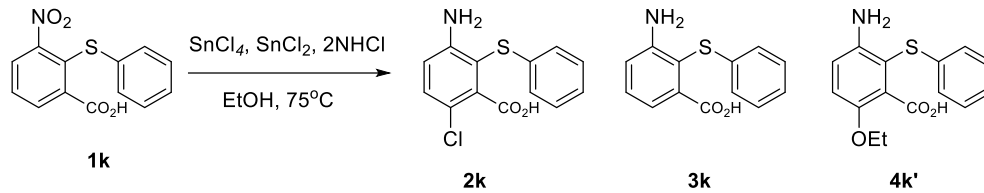

| Name         | 2k       | 3k        | 4k'      |
|--------------|----------|-----------|----------|
| Extract mass | 279.0121 | 245.0510  | 289.0773 |
| LC-RT        | ND       | ND        | ND       |
| GC-RT        | ND       | 13.90 min | ND       |

Analysis Date & Time : 2014/10/17 下午 06:04:02  
 User Name : Lab 1336  
 Vial# : 1  
 Sample Name : 2SPh 3CO2H reduction  
 Sample ID : 2SPh 3CO2H reduction  
 Injection Volume : 1 uL  
 Data Name : D:\1336\HYH\20141017\2SPh 3CO2H reduction -1.gcd  
 Method Name : D:\1336\HYH\HYH-20140928 for chlorination.gcm  
 \$EndIf\$

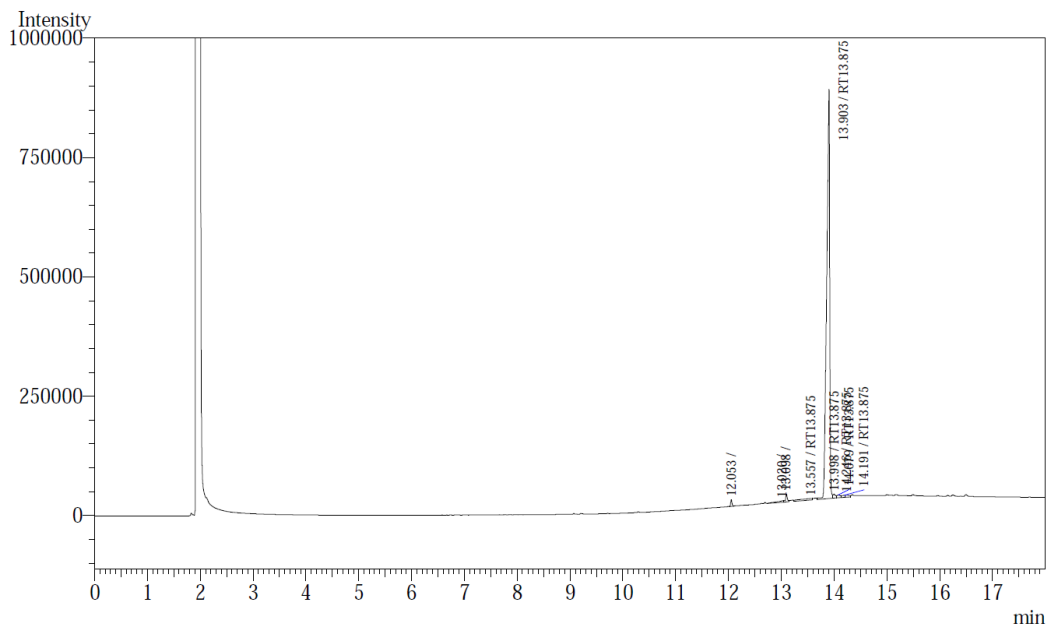

| Peak#        | Ret.Time | Area    | Height | Area%    |
|--------------|----------|---------|--------|----------|
| 1            | 12.053   | 24255   | 14020  | 0.6805   |
| 2            | 13.020   | 29489   | 3037   | 0.8274   |
| 3            | 13.098   | 40979   | 16500  | 1.1497   |
| 4            | 13.557   | 63727   | 3500   | 1.7880   |
| 5            | 13.903   | 3314108 | 853032 | 92.9848  |
| 6            | 13.998   | 27128   | 8406   | 0.7612   |
| 7            | 14.079   | 23567   | 5860   | 0.6612   |
| 8            | 14.191   | 20631   | 4243   | 0.5788   |
| 9            | 14.246   | 20255   | 4001   | 0.5683   |
| <b>Total</b> |          | 3564139 | 912599 | 100.0000 |

**3k**

# LC and GC Report of compound 11 under reduction-halogenation condition.

## 11 Scheme

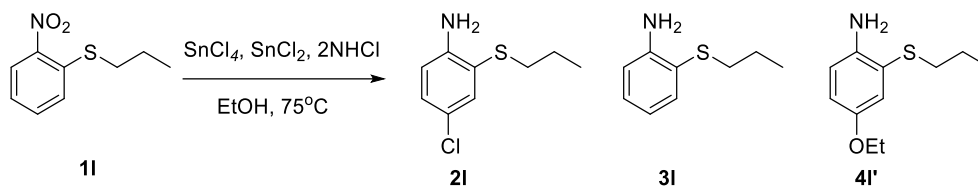

| Name         | 21        | 31       | 41'       |
|--------------|-----------|----------|-----------|
| Extract mass | 201.0379  | 167.0769 | 211.1031  |
| LC-RT        | 6.55 min  | 4.90 min | 4.67 min  |
| GC-RT        | 10.46 min | 8.87 min | 10.90 min |

## Chromatogram

Report for "prop-H 4.5eq re\_21\_01\_5395"  
 Printed: 20:36:14 05/30/14 Computer:1AP05 User:default

### Report for "prop-H 4.5eq re\_21\_01\_5395"

#### Chromatogram File:

D:\CHEM32\1\DATA\prop-H 4.5eq re\_21\_01\_5395.d\prop-H 4.5eq re\_21\_01\_5395.unt

Created on: 5/30/2014 at: 08:26:14 pm  
 on Windows system: 1AP05 by user: TOP-User  
 with HyStar Version 3.2.44.0  
 Operator: default, Laboratory:

Total Chromatogram Runtime: 10.02 min

Signal 1: DAD (254)

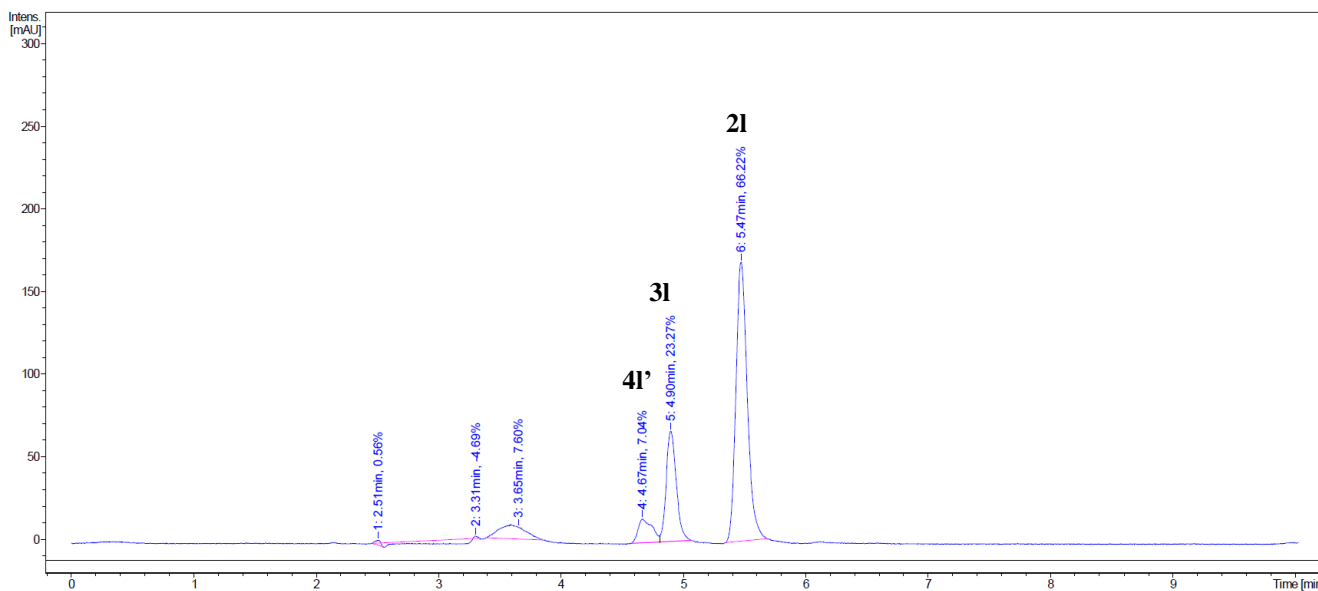

Analysis Date & Time : 2014/6/5 下午 05:05:21  
 User Name : Lab 1336  
 Vial# : 1  
 Sample Name : prop H red  
 Sample ID : prop H red  
 Injection Volume : 1 uL  
 Data Name : D:\1336\HYH\HHY 20140605\prop H red.gcd  
 Method Name : D:\1336\HYH\HYH-20140401.gcm  
 \$EndIf\$

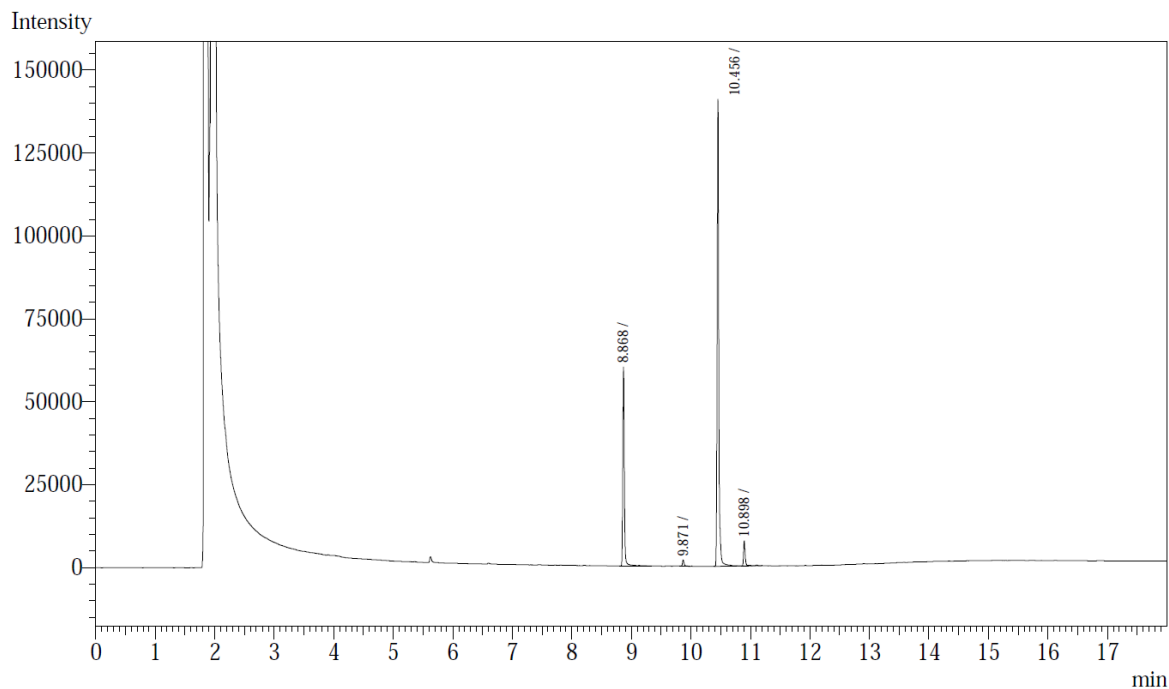

| Peak#        | Ret. Time | Area   | Height | Area%    |            |
|--------------|-----------|--------|--------|----------|------------|
| 1            | 8.868     | 109598 | 58846  | 28.0339  | <b>3I</b>  |
| 2            | 9.871     | 3810   | 1877   | 0.9744   |            |
| 3            | 10.456    | 264122 | 139166 | 67.5593  | <b>2I</b>  |
| 4            | 10.898    | 13419  | 7343   | 3.4324   | <b>4I'</b> |
| <b>Total</b> |           | 390949 | 207232 | 100.0000 |            |

# LC and GC Report of compound 1m under reduction-halogenation condition.

## 1m Scheme

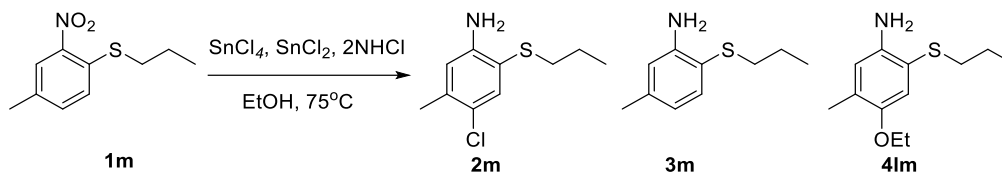

| Name         | 2m        | 3m       | 4m'       |
|--------------|-----------|----------|-----------|
| Extract mass | 215.0535  | 181.0925 | 225.1187  |
| LC-RT        | 6.01 min  | 4.04 min | 2.47 min  |
| GC-RT        | 11.12 min | 9.64 min | 11.27 min |

## Chromatogram

Report for "prop-Me 4.5eq\_22\_01\_5393"  
 Printed: 20:33:24 05/30/14 Computer: IAP05 User: default

### Report for "prop-Me 4.5eq\_22\_01\_5393"

#### Chromatogram File:

D:\CHEM32\1\DATA\prop-Me 4.5eq\_22\_01\_5393.d\prop-Me 4.5eq\_22\_01\_5393.unt

Created on: 5/30/2014 at: 08:01:16 pm  
 on Windows system: IAP05 by user: TOP-User  
 with HyStar Version 3.2.44.0  
 Operator: default, Laboratory:

Total Chromatogram Runtime: 10.02 min

Signal 1: DAD (254)

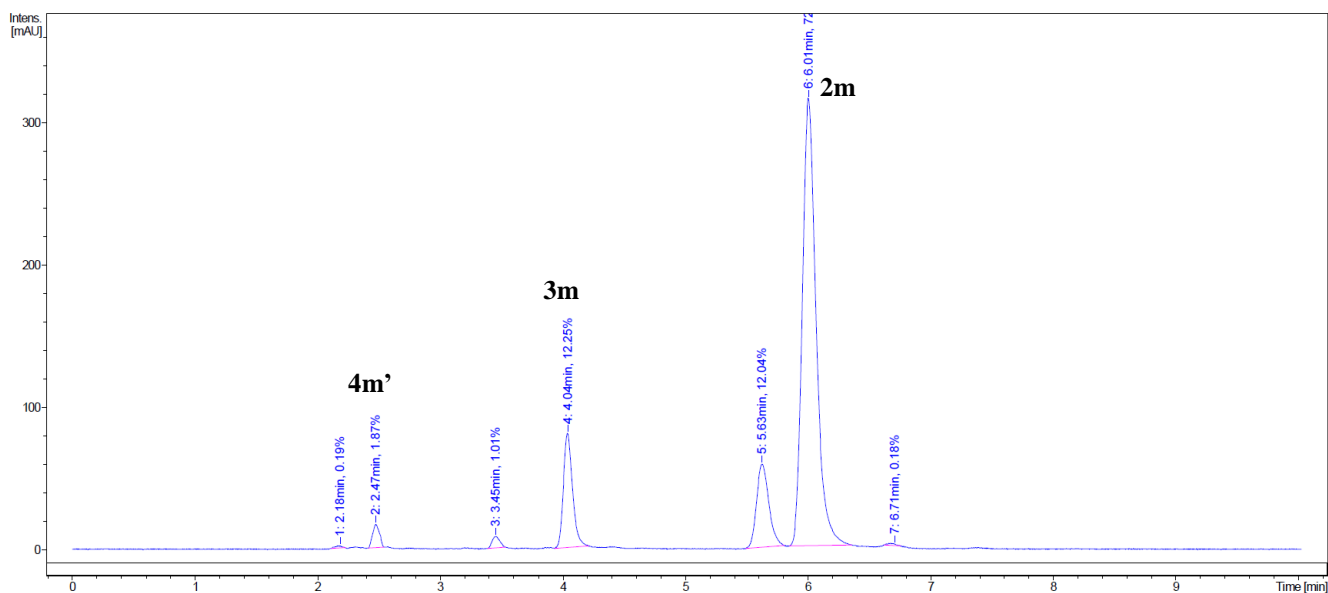

Analysis Date & Time : 2014/6/5 下午 04:00:01  
 User Name : Lab 1336  
 Vial# : 1  
 Sample Name : prop Me red  
 Sample ID : prop Me red  
 Injection Volume : 1 uL  
 Data Name : D:\1336\HYH\HHY 20140605\prop Me red.gcd  
 Method Name : D:\1336\HYH\HYH-20140401.gcm  
 \$EndIf\$

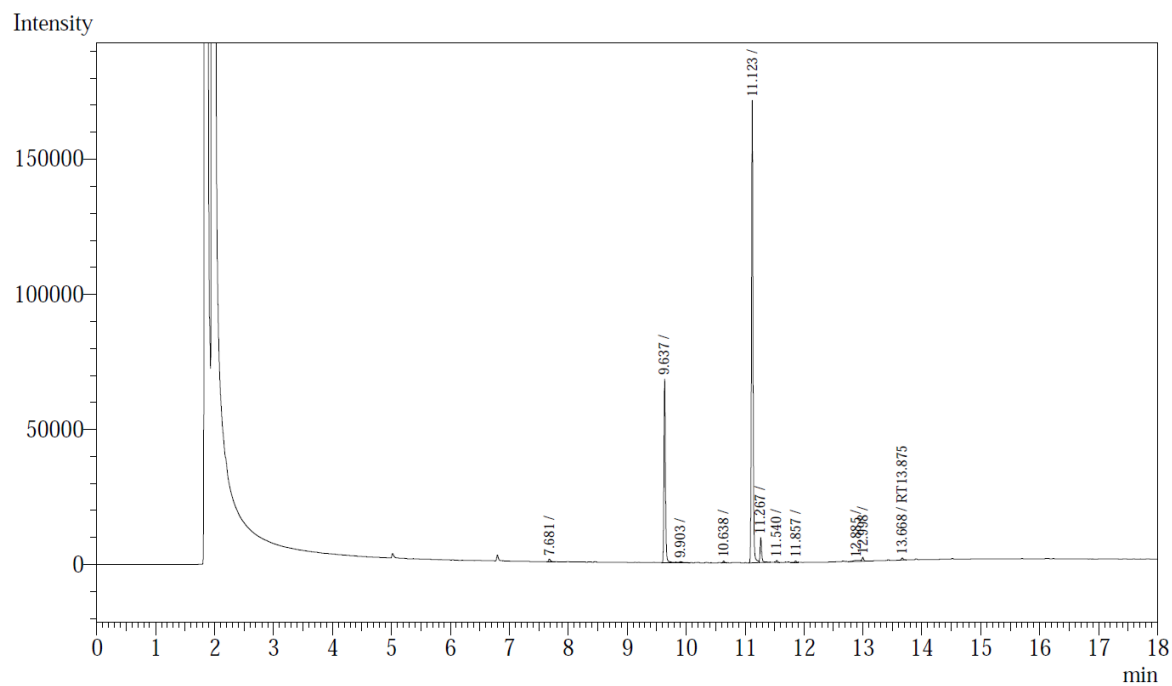

| Peak#        | Ret.Time | Area   | Height | Area%    |
|--------------|----------|--------|--------|----------|
| 1            | 7.681    | 2126   | 986    | 0.4629   |
| 2            | 9.637    | 119484 | 66992  | 26.0131  |
| 3            | 9.903    | 1928   | 379    | 0.4198   |
| 4            | 10.638   | 1338   | 720    | 0.2914   |
| 5            | 11.123   | 307158 | 168955 | 66.8720  |
| 6            | 11.267   | 17836  | 9086   | 3.8832   |
| 7            | 11.540   | 1210   | 715    | 0.2634   |
| 8            | 11.857   | 1241   | 594    | 0.2702   |
| 9            | 12.885   | 2717   | 336    | 0.5916   |
| 10           | 12.998   | 2804   | 1418   | 0.6106   |
| 11           | 13.668   | 1478   | 742    | 0.3217   |
| <b>Total</b> |          | 459320 | 250923 | 100.0000 |

# LC and GC Report of compound 1n under reduction-halogenation condition.

In Scheme

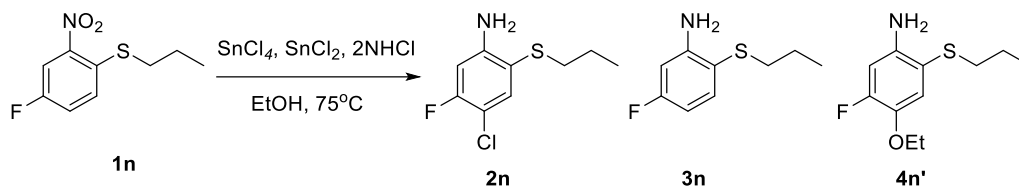

| Name         | 2n        | 3n       | 4n'       |
|--------------|-----------|----------|-----------|
| Extract mass | 219.0285  | 185.0674 | 229.0937  |
| LC-RT        | 5.85 min  | 4.84 min | 4.31 min  |
| GC-RT        | 10.46 min | 8.87 min | 10.90 min |

## Chromatogram

Report for "prop-F 4.5eq\_23\_01\_5394"  
 Printed: 20:35:12 05/30/14 Computer:1AP05 User:default

### Report for "prop-F 4.5eq\_23\_01\_5394"

Chromatogram File:

D:\CHEM32\1\DATA\prop-F 4.5eq\_23\_01\_5394.d\prop-F 4.5eq\_23\_01\_5394.unt

Created on: 5/30/2014 at: 08:13:44 pm  
 on Windows system: 1AP05 by user: TOP-User  
 with HyStar Version 3.2.44.0  
 Operator: default, Laboratory:

Total Chromatogram Runtime: 10.02 min

Signal 1: DAD (254)

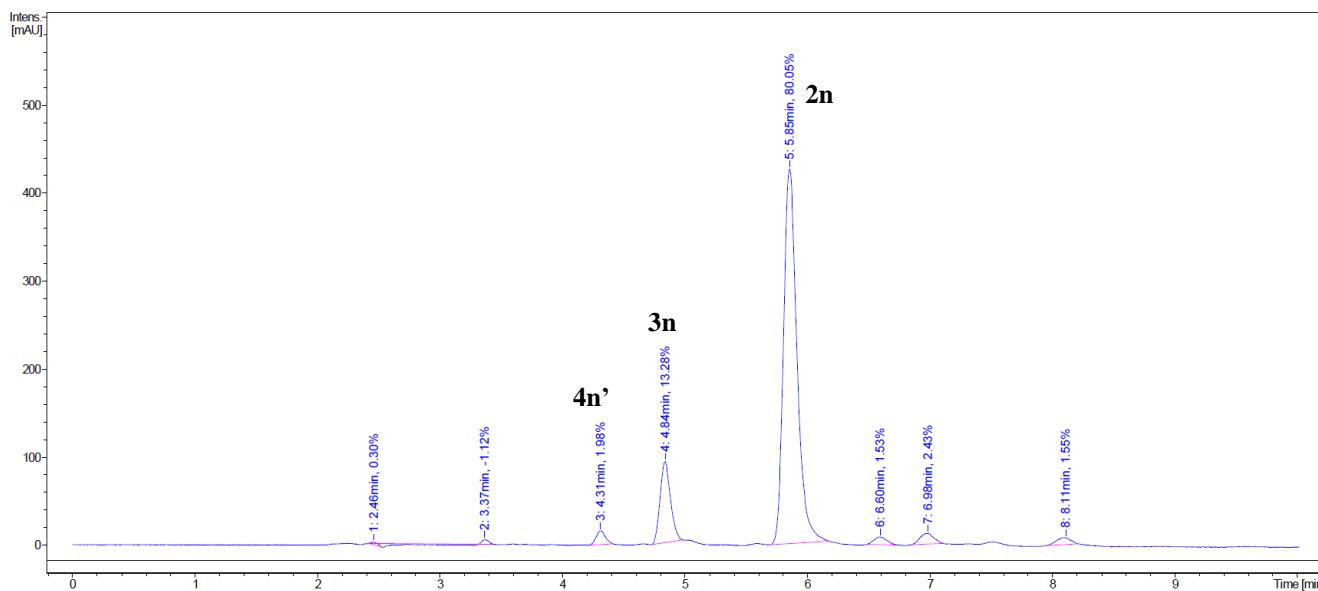

Analysis Date & Time : 2014/6/5 下午 03:13:11  
 User Name : Lab 1336  
 Vial# : 1  
 Sample Name : prop F red  
 Sample ID : prop F red  
 Injection Volume : 1 uL  
 Data Name : D:\1336\HYH\HHY 20140605\prop F red.gcd  
 Method Name : D:\1336\HYH\HYH-20140401.gcm  
 \$EndIf\$

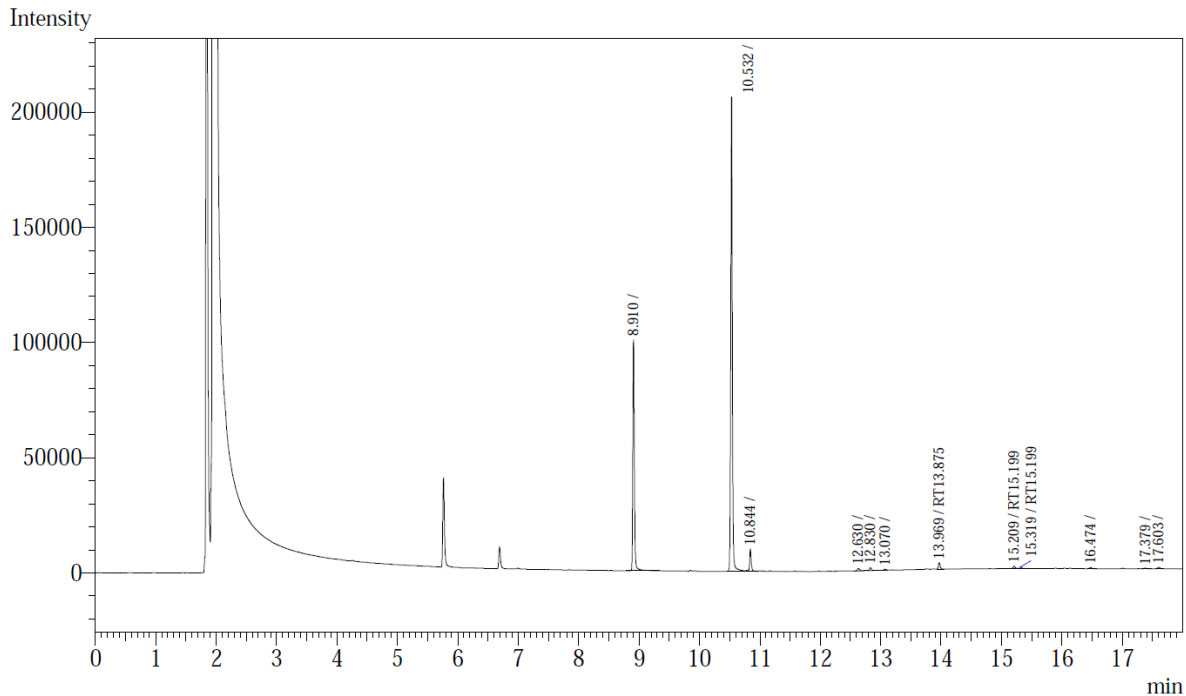

| Peak#        | Ret.Time | Area          | Height        | Area%           |            |
|--------------|----------|---------------|---------------|-----------------|------------|
| 1            | 8.910    | 180084        | 98039         | 29.8751         | <b>3n</b>  |
| 2            | 10.532   | 381937        | 202793        | 63.3616         | <b>2n</b>  |
| 3            | 10.844   | 19462         | 9698          | 3.2287          | <b>4n'</b> |
| 4            | 12.630   | 2629          | 1065          | 0.4362          |            |
| 5            | 12.830   | 2714          | 1285          | 0.4503          |            |
| 6            | 13.070   | 1217          | 569           | 0.2019          |            |
| 7            | 13.969   | 5743          | 2853          | 0.9527          |            |
| 8            | 15.209   | 2507          | 1025          | 0.4160          |            |
| 9            | 15.319   | 1686          | 767           | 0.2797          |            |
| 10           | 16.474   | 1326          | 494           | 0.2200          |            |
| 11           | 17.379   | 1126          | 348           | 0.1868          |            |
| 12           | 17.603   | 2358          | 767           | 0.3912          |            |
| <b>Total</b> |          | <b>602789</b> | <b>319703</b> | <b>100.0000</b> |            |



**GC Report of compound 1o under reduction-halogenation condition.**

1o Scheme

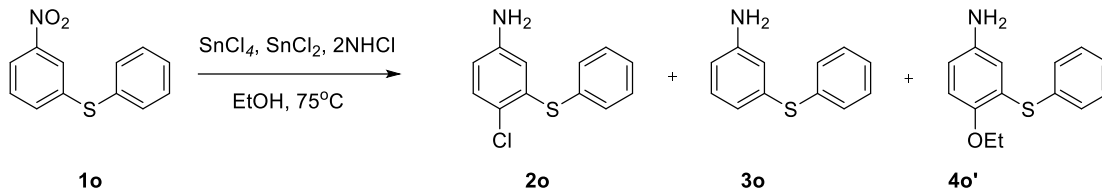

| Name         | 2o       | 3o        | 4o'      |
|--------------|----------|-----------|----------|
| Extract mass | 235.0222 | 201.0612  | 245.0874 |
| LC-RT        | ND       | ND        | ND       |
| GC-RT        | ND       | 12.26 min | ND       |

Analysis Date & Time : 2014/9/29 下午 12:05:36  
 User Name : Lab 1336  
 Vial# : 1  
 Sample Name : HYH-20140928-3-S cl-2  
 Sample ID : HYH-3-S cl-2  
 Injection Volume : 1 uL  
 Data Name : D:\1336\HYH\HYH-20140928\HYH-3-S cl-2.gcd  
 Method Name : D:\1336\HYH\HYH-20140928 for chlorination.gcm  
 \$EndIf\$

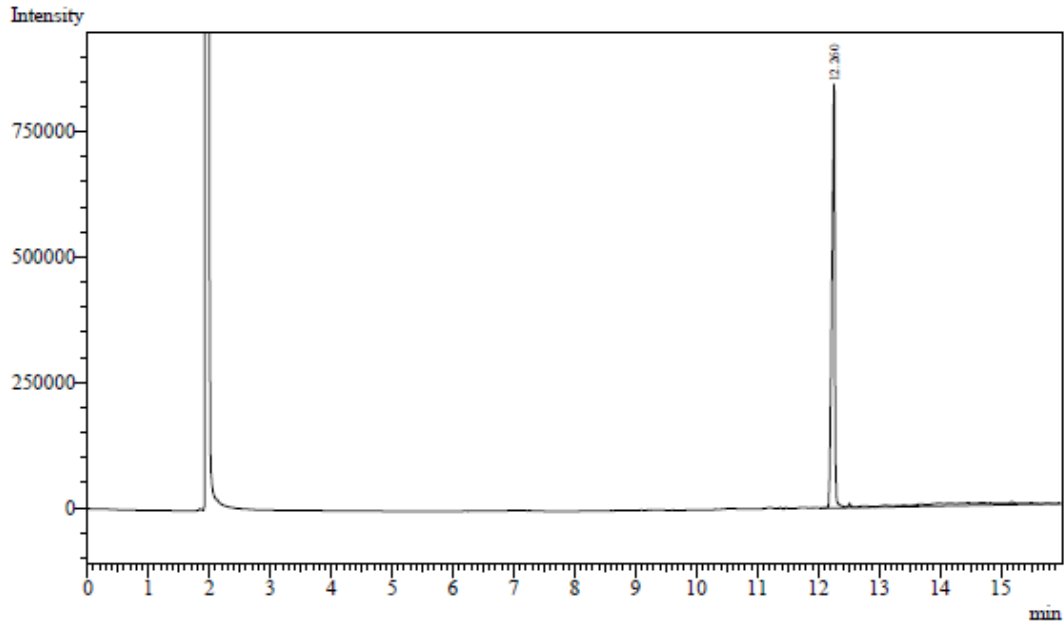

| Peak#        | Ret. Time | Area    | Height | Area%    |
|--------------|-----------|---------|--------|----------|
| 1            | 12.260    | 2917174 | 831333 | 100.0000 |
| <b>Total</b> |           | 2917174 | 831333 | 100.0000 |

3o

# LC and GC Report of compound 1p under reduction-halogenation condition.

## 1p Scheme

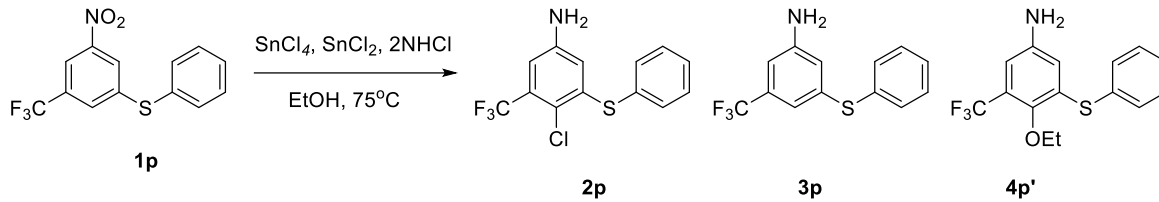

| Name         | 2p       | 3p        | 4p'      |
|--------------|----------|-----------|----------|
| Extract mass | 303.0096 | 269.0486  | 313.0748 |
| LC-RT        | ND       | ND        | ND       |
| GC-RT        | ND       | 11.98 min | ND       |

Analysis Date & Time : 2014/9/9 下午 06:52:28  
 User Name : Lab 1336  
 Vial# : 1  
 Sample Name : 5-CF3 3-S 1NO2 coupling reaction  
 Sample ID : 5-CF3 3-S 1NO2 coupling reactio  
 Injection Volume : 1 uL  
 Data Name : D:\1336\HYH\20140909\5-CF3 3-S 1NO2 coupling reaction.gcd  
 Method Name : D:\1336\HYH\HYH-20140818 for chlorination.gcm  
 \$EndIf\$

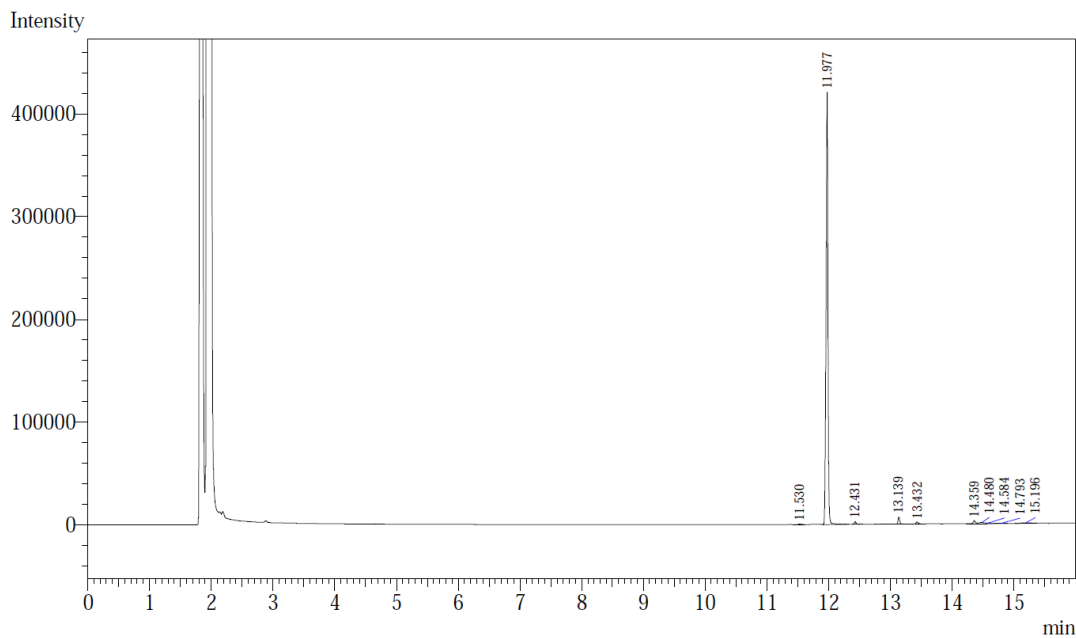

| Peak#        | Ret.Time | Area          | Height        | Area%           |
|--------------|----------|---------------|---------------|-----------------|
| 1            | 11.530   | 1405          | 518           | 0.1504          |
| 2            | 11.977   | 885497        | 418200        | 94.7819         |
| 3            | 12.431   | 4571          | 2584          | 0.4892          |
| 4            | 13.139   | 13412         | 6758          | 1.4355          |
| 5            | 13.432   | 5046          | 2094          | 0.5401          |
| 6            | 14.359   | 7775          | 2977          | 0.8322          |
| 7            | 14.480   | 7598          | 1000          | 0.8133          |
| 8            | 14.584   | 2093          | 590           | 0.2240          |
| 9            | 14.793   | 1060          | 157           | 0.1134          |
| 10           | 15.196   | 5791          | 554           | 0.6199          |
| <b>Total</b> |          | <b>934248</b> | <b>435432</b> | <b>100.0000</b> |

# LC and GC Report of compound 1q under reduction-halogenation condition.

## 1q Scheme

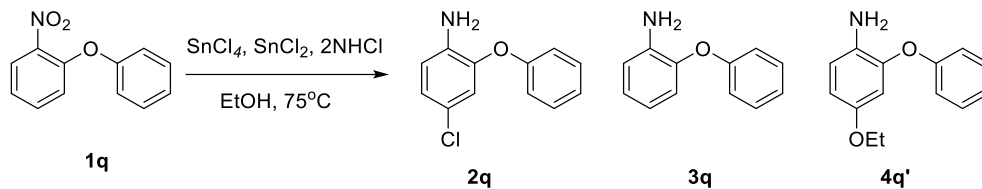

| Name         | 2q        | 3q       | 4q'       |
|--------------|-----------|----------|-----------|
| Extract mass | 219.0451  | 185.0841 | 229.1103  |
| LC-RT        | 4.84 min  | 4.16 min | 3.83 min  |
| GC-RT        | 10.64 min | 9.40 min | 11.00 min |

## Chromatogram

Report for "H-O-Ph\_31\_01\_5672"  
 Printed: 15:24:01 08/19/14 Computer:1AP05 User:default

### Report for "H-O-Ph\_31\_01\_5672"

#### Chromatogram File:

D:\CHEM32\1\DATA\H-O-Ph\_31\_01\_5672.d\H-O-Ph\_31\_01\_5672.unt

Created on: 8/19/2014 at: 02:57:15 pm  
 on Windows system: 1AP05 by user: TOF-User  
 with HyStar Version 3.2.44.0  
 Operator: default, Laboratory:

Total Chromatogram Runtime: 15.02 min

Signal 1: DAD (254)

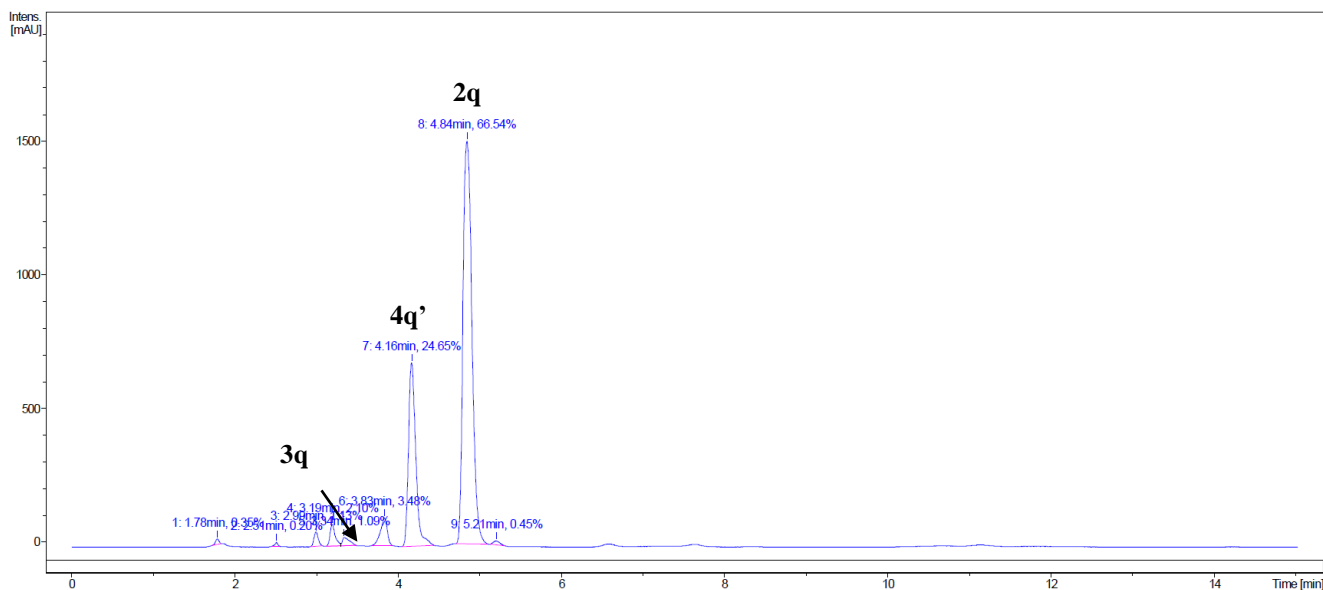

Analysis Date & Time : 2014/8/12 下午 12:26:17  
 User Name : Lab 1336  
 Vial# : 1  
 Sample Name : H-O-Ph  
 Sample ID : H-O-Ph  
 Injection Volume : 1 uL  
 Data Name : D:\1336\HYH\HYH-20140812\H-O-Ph.gcd  
 Method Name : D:\1336\HYH\HYH-20140401 test-1.gcm  
 \$EndIf\$

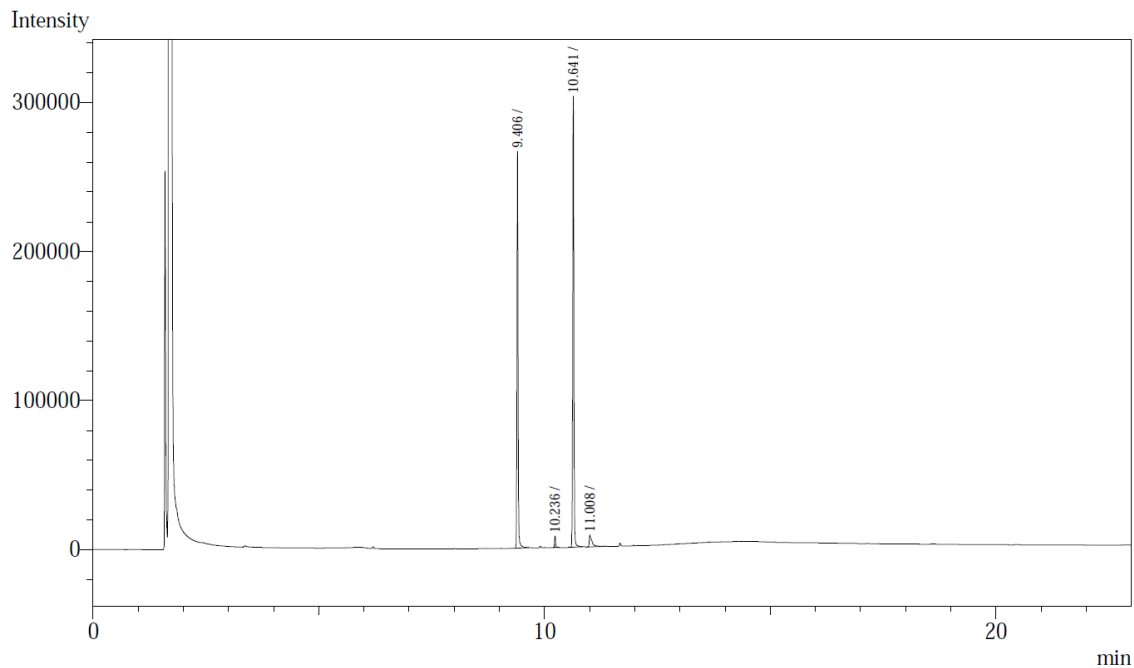

| Peak#        | Ret.Time | Area    | Height | Area%    |            |
|--------------|----------|---------|--------|----------|------------|
| 1            | 9.406    | 465112  | 262223 | 45.0113  | <b>3q</b>  |
| 2            | 10.236   | 12820   | 7841   | 1.2407   |            |
| 3            | 10.641   | 523174  | 298395 | 50.6302  | <b>2q,</b> |
| 4            | 11.008   | 32217   | 8015   | 3.1178   | <b>4q'</b> |
| <b>Total</b> |          | 1033323 | 576474 | 100.0000 |            |

## LC and GC Report of compound 1r under reduction-halogenation condition.

### 1r Scheme

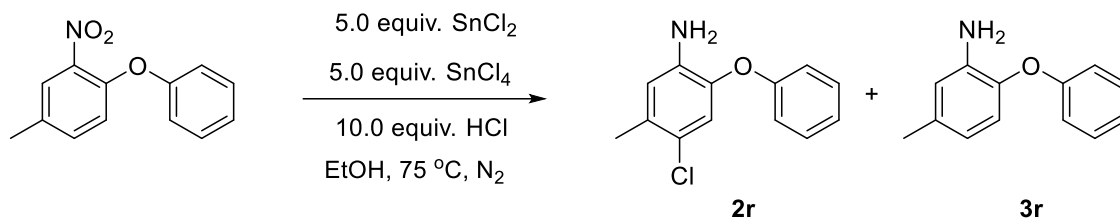

| Name                  | 2r       | 3r       |
|-----------------------|----------|----------|
| LC-RT                 | 1.04 min | 0.74 min |
| MH <sup>+</sup> (m/z) | 234, 236 | 200      |

Mobile phase: 60% ACN in 0.5% TFA

Column: Phenyl-Hexyl

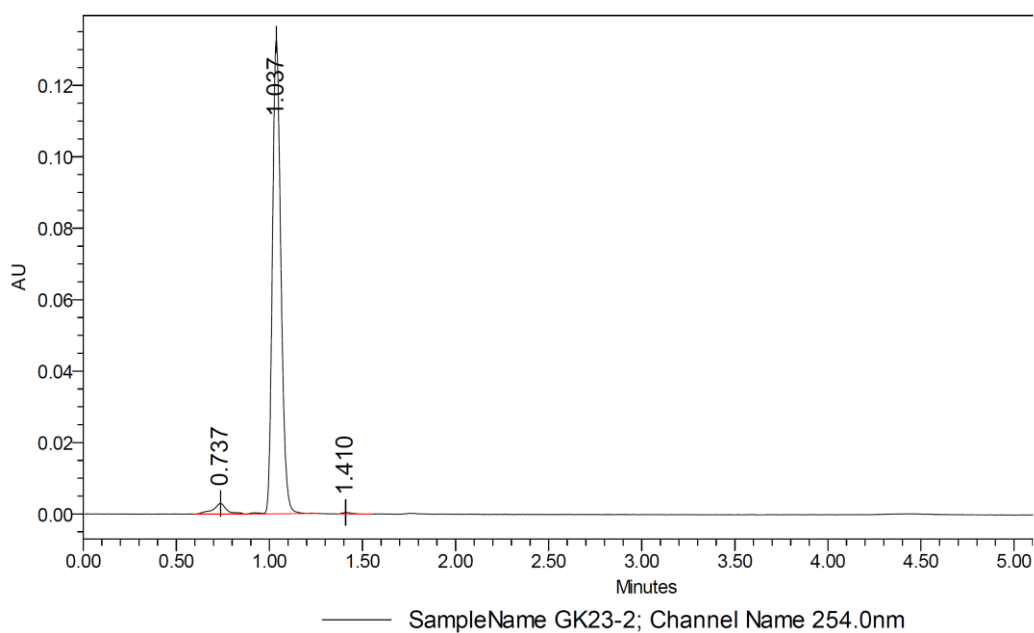

Purified 2r: [M+H]<sup>+</sup> = 234, 236

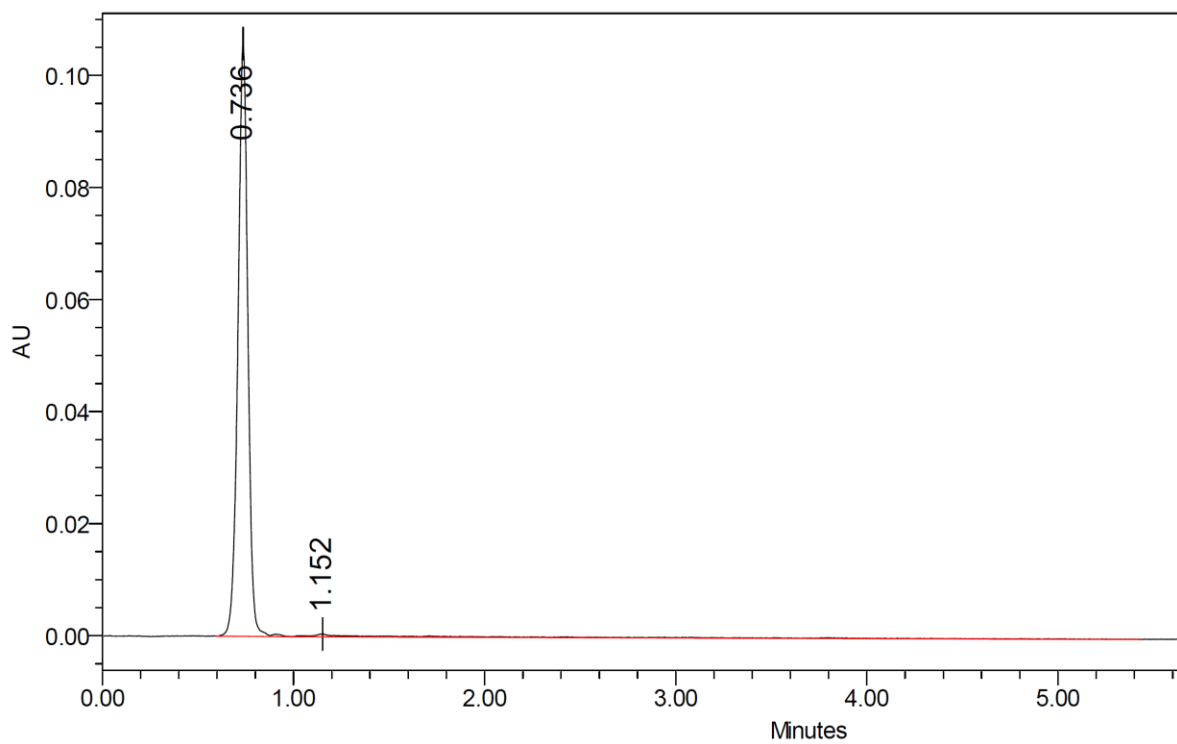

— SampleName GK23-1; Channel Name 254.0nm@4

Purified 3r:  $[M+H]^+ = 200$

## LC and GC Report of compound 1s under reduction-halogenation condition.

### 1s Scheme

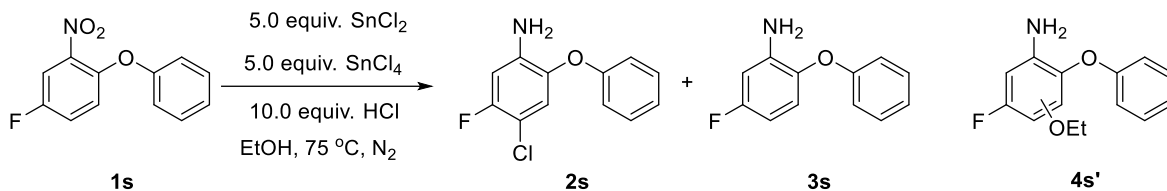

| Name                  | 2s       | 3s       | 4s'            |
|-----------------------|----------|----------|----------------|
| MH <sup>+</sup> (m/z) | 238, 240 | 204      | 248            |
| LC-RT                 | 5.09 min | 2.33 min | 1.19, 3.47 min |
| Peal area %           | 32       | 45       | 2.8, 2.9       |

Mobile phase: 40% ACN in 0.5% TFA

Column: Phenyl-Hexyl, 2.1 × 100 mm

Flow rate: 0.4 mL/min

UV: 254 nm

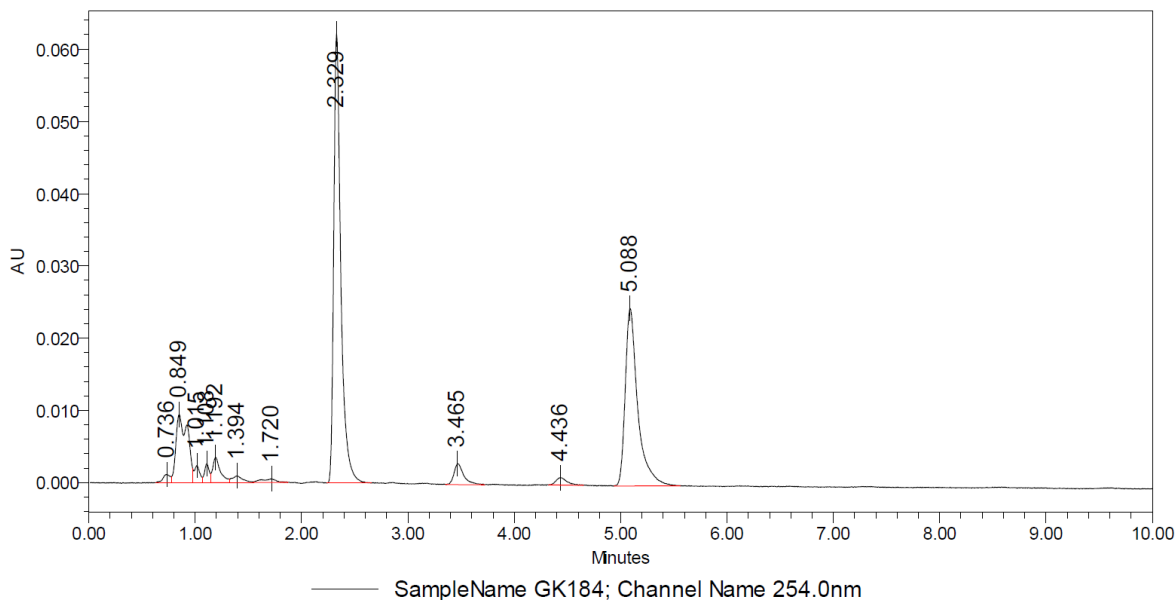

Crude reaction mixture contained compounds 2s and 3s.

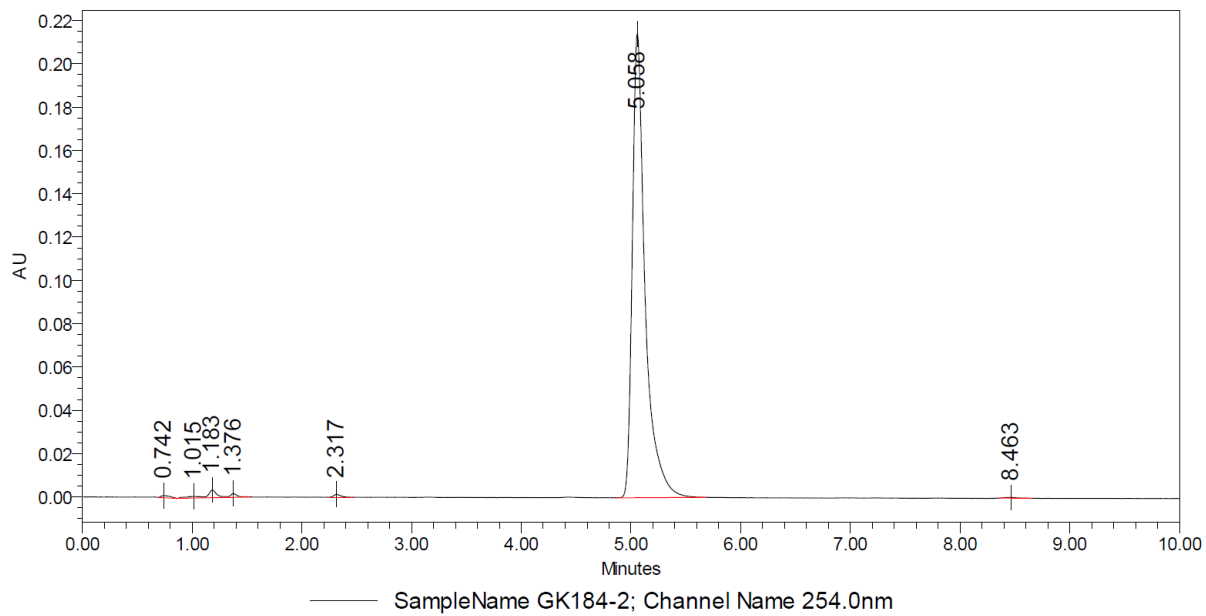

Purified 2s: [M+H]<sup>+</sup> = 238, 240

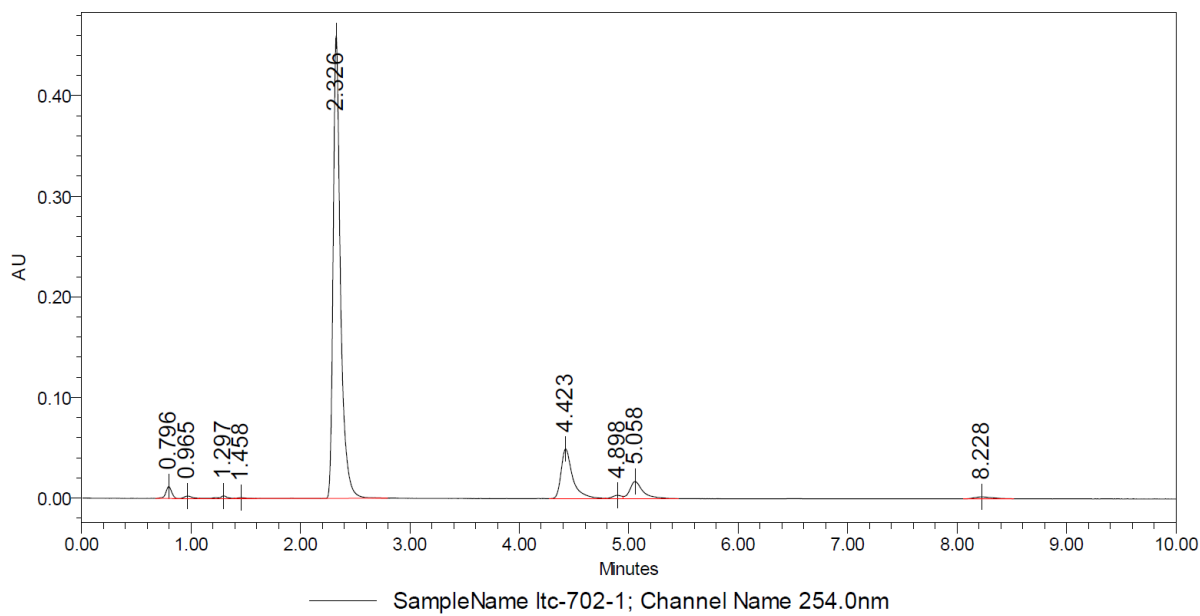

Purified 3s: [M+H]<sup>+</sup> = 204



# LC and GC Report of compound 1s under reduction-halogenation condition.

## It Scheme

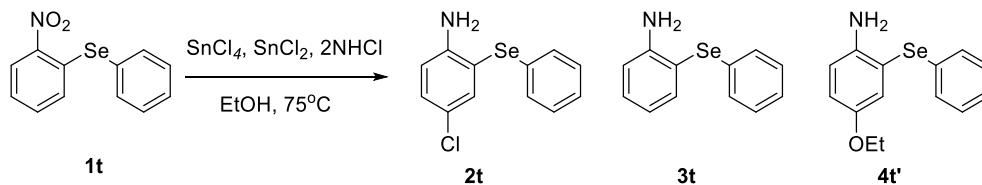

| Name         | <b>2t</b> | <b>3t</b> | <b>4t'</b> |
|--------------|-----------|-----------|------------|
| Extract mass | 282.9667  | 249.0057  | 293.0319   |
| LC-RT        | 5.87 min  | 4.58 min  | 2.99 min   |
| GC-RT        | 13.24 min | 11.99 min | 12.44 min  |

## Chromatogram

Report for "Se\_21\_01\_5528"

Printed: 14:36:33 07/17/14 Computer:1AP05 User:default

### Report for "Se\_21\_01\_5528"

#### Chromatogram File:

D:\CHEM32\1\DATA\lab1336\hyh\hyh 20140717 lc-ms\Se\_21\_01\_5528.d\Se\_21\_01\_5528.unt

Created on: 7/17/2014 at: 02:05:19 pm

on Windows system: 1AP05 by user: TOF-User

with HyStar Version 3.2.44.0

Operator: default, Laboratory:

Total Chromatogram Runtime: 10.02 min

Signal 1: DAD (254)

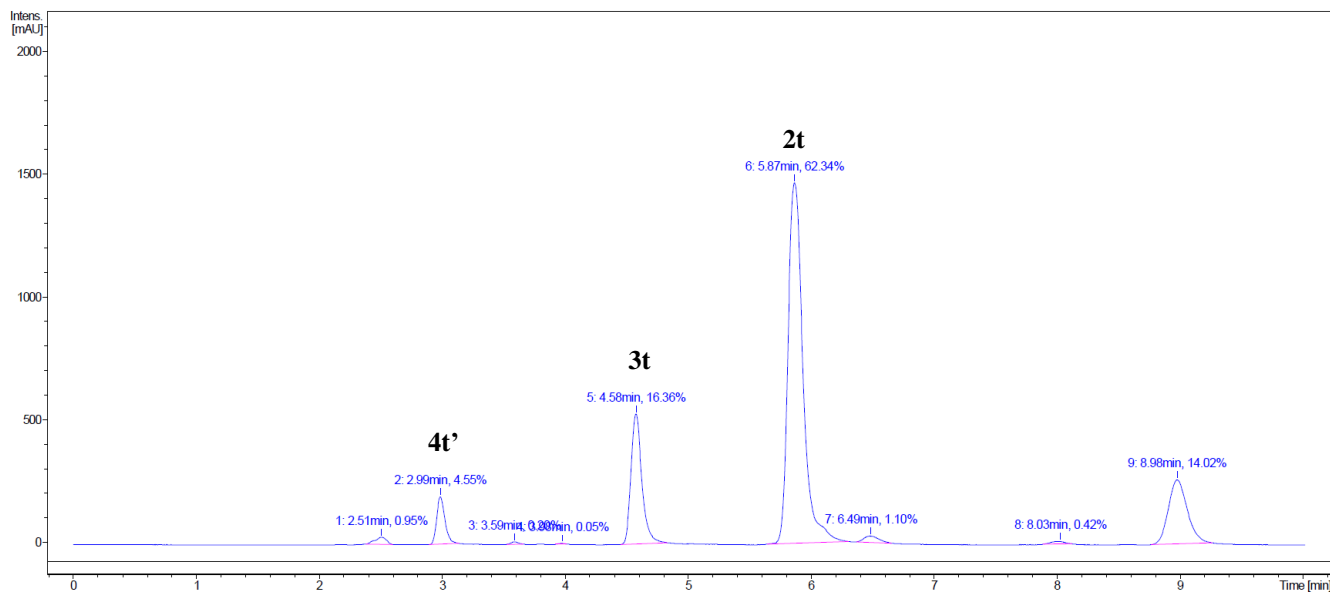

Analysis Date & Time : 2014/7/24 下午 02:42:44  
 User Name : Lab 1336  
 Vial# : 1  
 Sample Name : Se red  
 Sample ID : Se red  
 Injection Volume : 1 uL  
 Data Name : D:\1336\HYH\20140724\Se red.gcd  
 Method Name : D:\1336\HYH\HYH-20140401.gcm  
 \$EndIf\$

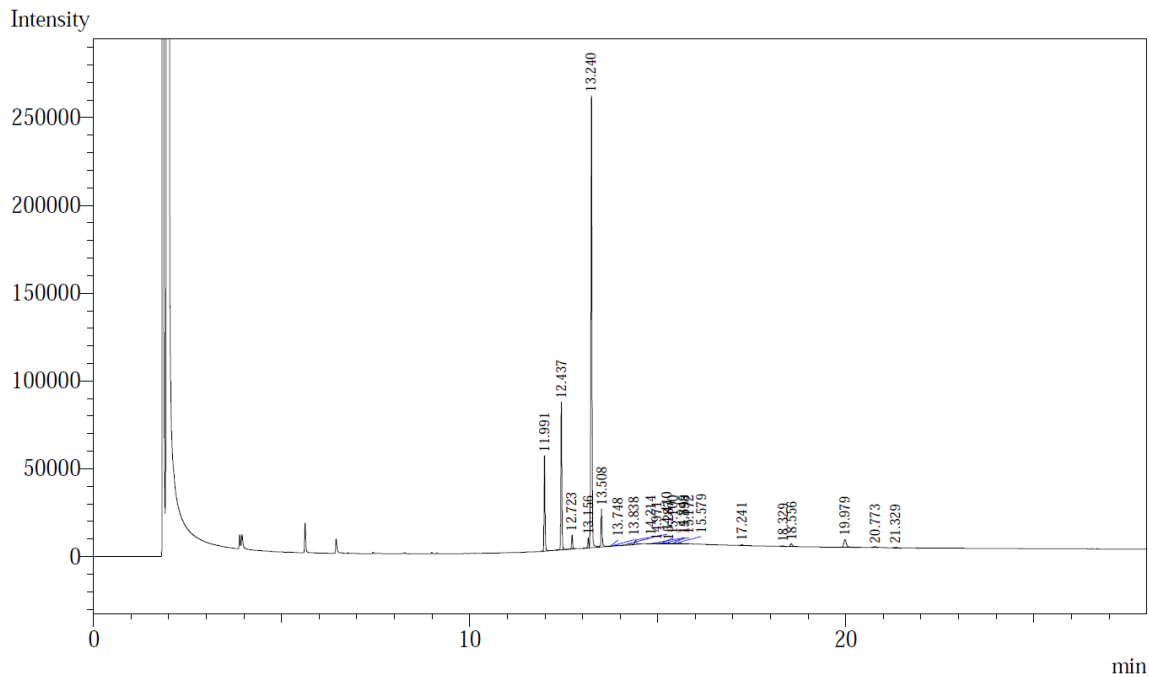

| Peak#        | Ret.Time | Area          | Height        | Area%           |            |
|--------------|----------|---------------|---------------|-----------------|------------|
| 1            | 11.991   | 95823         | 53819         | 10.6307         | <b>3t</b>  |
| 2            | 12.437   | 152701        | 81974         | 16.9407         | <b>4t'</b> |
| 3            | 12.723   | 15217         | 7900          | 1.6882          |            |
| 4            | 13.156   | 12084         | 5783          | 1.3406          |            |
| 5            | 13.240   | 514317        | 251199        | 57.0585         | <b>2t</b>  |
| 6            | 13.508   | 45884         | 21573         | 5.0904          |            |
| 7            | 13.748   | 1796          | 225           | 0.1993          |            |
| 8            | 13.838   | 1877          | 488           | 0.2082          |            |
| 9            | 14.214   | 4915          | 681           | 0.5453          |            |
| 10           | 14.410   | 9541          | 2556          | 1.0585          |            |
| 11           | 14.845   | 1065          | 143           | 0.1182          |            |
| 12           | 14.971   | 1457          | 226           | 0.1616          |            |
| 13           | 15.100   | 1307          | 316           | 0.1450          |            |
| 14           | 15.172   | 1847          | 360           | 0.2050          |            |
| 15           | 15.287   | 1868          | 325           | 0.2073          |            |
| 16           | 15.398   | 2243          | 299           | 0.2489          |            |
| 17           | 15.579   | 4508          | 1006          | 0.5002          |            |
| 18           | 17.241   | 1346          | 458           | 0.1493          |            |
| 19           | 18.329   | 1231          | 396           | 0.1365          |            |
| 20           | 18.556   | 5757          | 1605          | 0.6386          |            |
| 21           | 19.979   | 20985         | 4424          | 2.3281          |            |
| 22           | 20.773   | 2392          | 581           | 0.2654          |            |
| 23           | 21.329   | 1224          | 244           | 0.1358          |            |
| <b>Total</b> |          | <b>901385</b> | <b>436581</b> | <b>100.0000</b> |            |

# LC and GC Report of compound 1u under reduction-halogenation condition.

## 1u Scheme

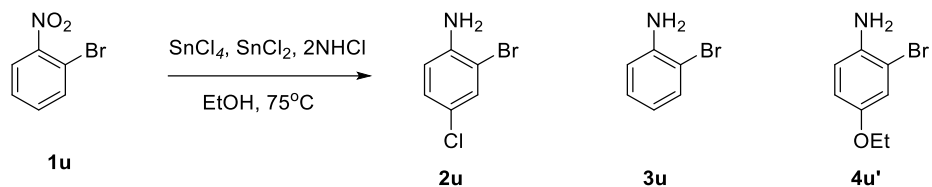

| Name         | 2u       | 3u       | 4u'      |
|--------------|----------|----------|----------|
| Extract mass | 204.9294 | 170.9684 | 214.9946 |
| LC-RT        | ND       | ND       | 4.04     |
| GC-RT        | ND       | ND       | 6.61     |

## Chromatogram

Report for "5H-2Br\_12\_01\_5812"  
 Printed: 13:27:18 12/01/14 Computer:1AP05 User:default

### Report for "5H-2Br\_12\_01\_5812"

#### Chromatogram File:

D:\CHEM32\1\DATA\5H-2Br\_12\_01\_5812.d\5H-2Br\_12\_01\_5812.unt

Created on: 10/14/2014 at: 02:26:47 pm  
 on Windows system: 1AP05 by user: TOF-User  
 with HyStar Version 3.2.44.0  
 Operator: default, Laboratory:

Total Chromatogram Runtime: 10.02 min

Signal 1: DAD (254)

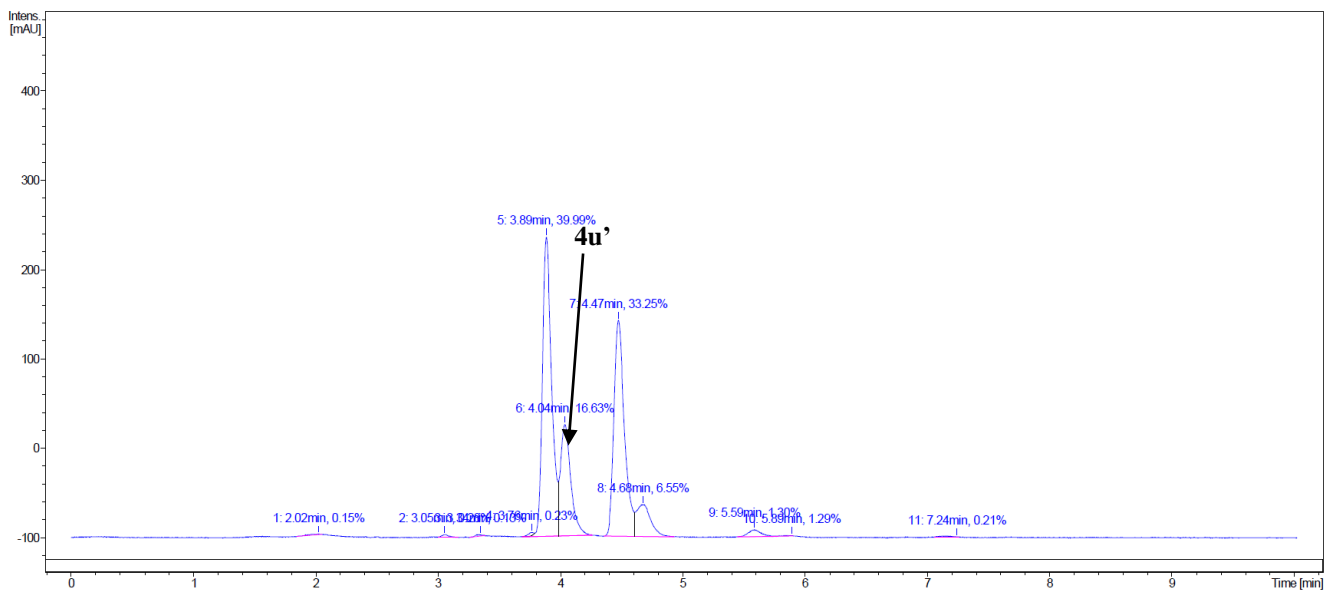

Analysis Date & Time : 2014/10/8 下午 04:28:00  
 User Name : Lab 1336  
 Vial# : 1  
 Sample Name : HYH-5-H,2-Br  
 Sample ID : HYH-5-H,2-Br  
 Injection Volume : 1 uL  
 Data Name : D:\1336\HYH\20141008\HYH-5-H,2-Br.gcd  
 Method Name : D:\1336\HYH\HYH-20140928 for chlorination.gcm  
 \$EndIf\$

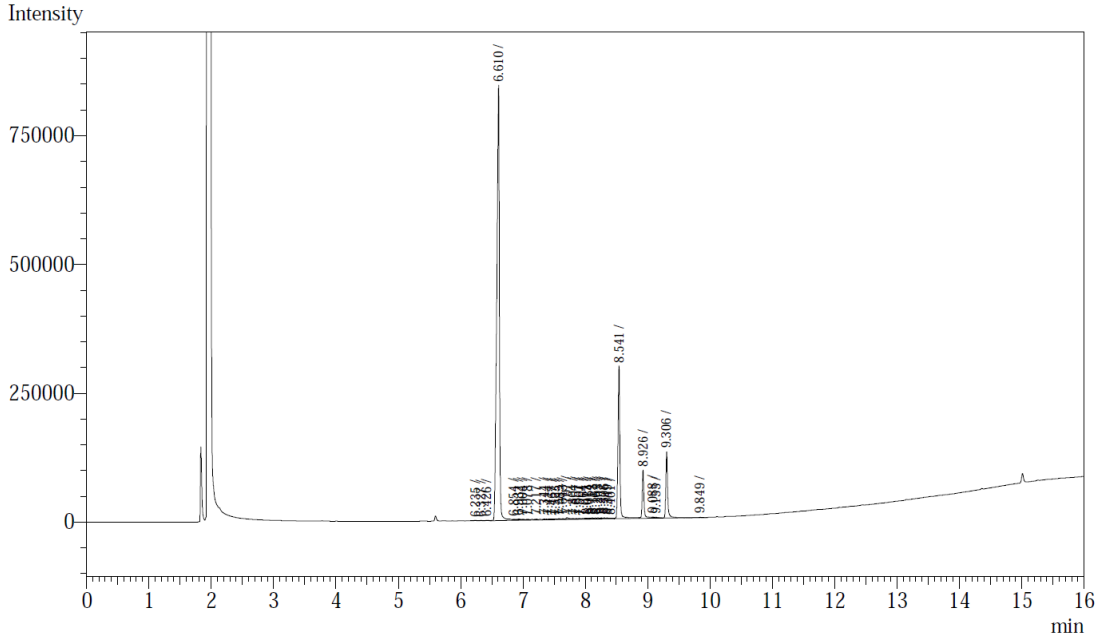

| Peak# | Ret. Time | Area    | Height | Area%   |            |
|-------|-----------|---------|--------|---------|------------|
| 1     | 6.235     | 2434    | 669    | 0.0659  |            |
| 2     | 6.327     | 1233    | 457    | 0.0334  |            |
| 3     | 6.426     | 2102    | 664    | 0.0569  |            |
| 4     | 6.610     | 2535986 | 835480 | 68.6652 | <b>4u'</b> |
| 5     | 6.854     | 1050    | 488    | 0.0284  |            |
| 6     | 6.932     | 2762    | 846    | 0.0748  |            |
| 7     | 7.004     | 1106    | 562    | 0.0299  |            |
| 8     | 7.078     | 1500    | 682    | 0.0406  |            |
| 9     | 7.217     | 2100    | 844    | 0.0569  |            |
| 10    | 7.344     | 1879    | 819    | 0.0509  |            |
| 11    | 7.414     | 1464    | 597    | 0.0396  |            |
| 12    | 7.467     | 2202    | 951    | 0.0596  |            |
| 13    | 7.523     | 1281    | 700    | 0.0347  |            |
| 14    | 7.583     | 2424    | 892    | 0.0656  |            |
| 15    | 7.643     | 1962    | 984    | 0.0531  |            |
| 16    | 7.707     | 8838    | 3030   | 0.2393  |            |
| 17    | 7.804     | 1987    | 902    | 0.0538  |            |
| 18    | 7.857     | 1851    | 986    | 0.0501  |            |
| 19    | 7.907     | 2182    | 955    | 0.0591  |            |
| 20    | 7.964     | 2381    | 1100   | 0.0645  |            |
| 21    | 8.017     | 2776    | 1181   | 0.0752  |            |
| 22    | 8.064     | 3304    | 1309   | 0.0895  |            |
| 23    | 8.113     | 3585    | 1427   | 0.0971  |            |
| 24    | 8.161     | 2767    | 1312   | 0.0749  |            |
| 25    | 8.203     | 3159    | 1326   | 0.0855  |            |
| 26    | 8.257     | 2473    | 1165   | 0.0670  |            |
| 27    | 8.306     | 2541    | 1103   | 0.0688  |            |
| 28    | 8.349     | 1892    | 952    | 0.0512  |            |
| 29    | 8.401     | 1557    | 763    | 0.0422  |            |
| 30    | 8.541     | 633379  | 289278 | 17.1496 |            |
| 31    | 8.926     | 196226  | 92900  | 5.3131  |            |

| Peak#        | Ret.Time | Area    | Height  | Area%    |
|--------------|----------|---------|---------|----------|
| 32           | 9.088    | 1221    | 704     | 0.0331   |
| 33           | 9.133    | 1447    | 533     | 0.0392   |
| 34           | 9.306    | 257126  | 125229  | 6.9620   |
| 35           | 9.849    | 1089    | 341     | 0.0295   |
| <b>Total</b> |          | 3693266 | 1372131 | 100.0000 |

# LC and GC Report of compound 1v under reduction-halogenation condition.

## 1v Scheme

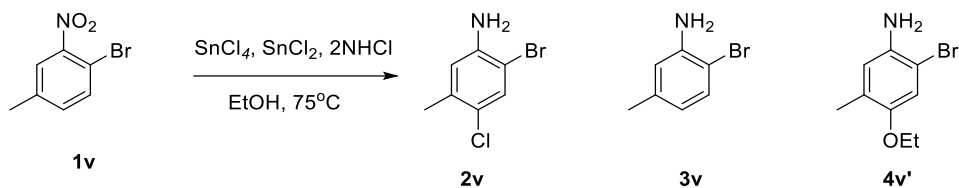

| Name         | 2v       | 3v       | 4v'      |
|--------------|----------|----------|----------|
| Extract mass | 218.9450 | 184.9840 | 229.0102 |
| LC-RT        | ND       | 4.24 min | 4.62 min |
| GC-RT        | ND       | 7.68 min | 9.42 min |

## Chromatogram

Report for "5Me-2Br\_13\_01\_5813"  
 Printed: 14:47:37 10/14/14 Computer:1AP05 User:default

### Report for "5Me-2Br\_13\_01\_5813"

#### Chromatogram File:

D:\CHEM32\1\DATA\5Me-2Br\_13\_01\_5813.d\5Me-2Br\_13\_01\_5813.unt

Created on: 10/14/2014 at: 02:39:19 pm  
 on Windows system: 1AP05 by user: TOF-User  
 with HyStar Version 3.2.44.0  
 Operator: default, Laboratory:

Total Chromatogram Runtime: 10.02 min

Signal 1: DAD (254)

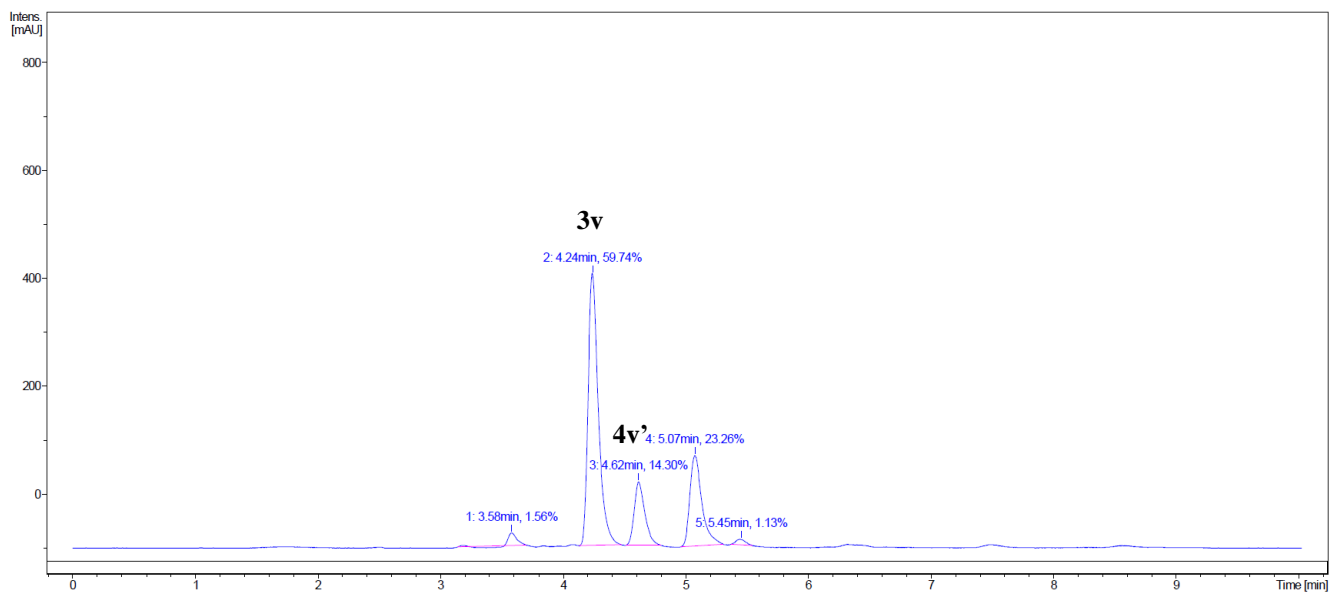

Analysis Date & Time : 2014/10/8 下午 04:01:39  
 User Name : Lab 1336  
 Vial# : 1  
 Sample Name : HYH-5-Me,2-Br  
 Sample ID : HYH-5-Me,2-Br  
 Injection Volume : 1 uL  
 Data Name : D:\1336\HYH\20141008\HYH-5-Me,2-Br2.gcd  
 Method Name : D:\1336\HYH\HYH-20140928 for chlorination.gcm  
 \$EndIf\$

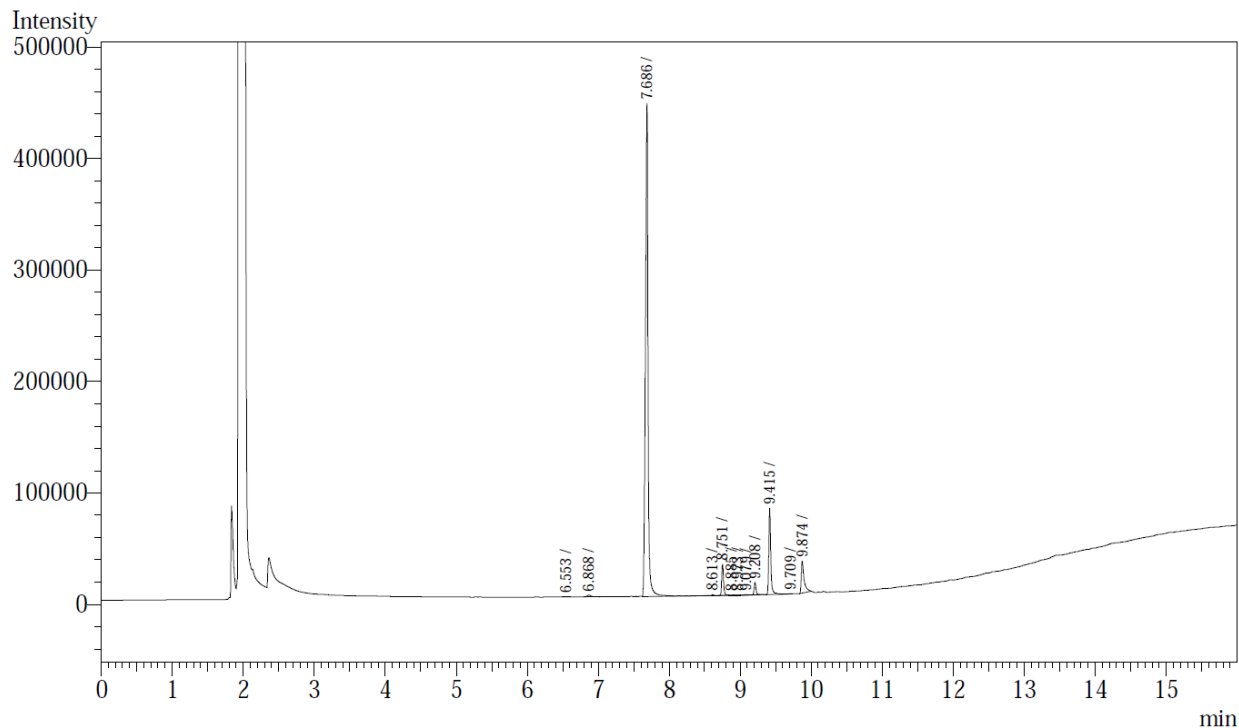

| Peak#        | Ret.Time | Area           | Height        | Area%           |            |
|--------------|----------|----------------|---------------|-----------------|------------|
| 1            | 6.553    | 1079           | 188           | 0.0760          |            |
| 2            | 6.868    | 6684           | 1876          | 0.4709          |            |
| 3            | 7.686    | 1104114        | 435914        | 77.7893         | <b>3v</b>  |
| 4            | 8.613    | 1769           | 902           | 0.1246          |            |
| 5            | 8.751    | 50762          | 27525         | 3.5764          |            |
| 6            | 8.885    | 1072           | 307           | 0.0755          |            |
| 7            | 8.973    | 1351           | 297           | 0.0952          |            |
| 8            | 9.079    | 1339           | 245           | 0.0943          |            |
| 9            | 9.208    | 20140          | 10805         | 1.4189          |            |
| 10           | 9.415    | 151810         | 76579         | 10.6956         | <b>4v'</b> |
| 11           | 9.709    | 1117           | 230           | 0.0787          |            |
| 12           | 9.874    | 78129          | 28419         | 5.5045          |            |
| <b>Total</b> |          | <b>1419366</b> | <b>583287</b> | <b>100.0000</b> |            |

# LC and GC Report of compound 1w under reduction-halogenation condition.

## 1w Scheme

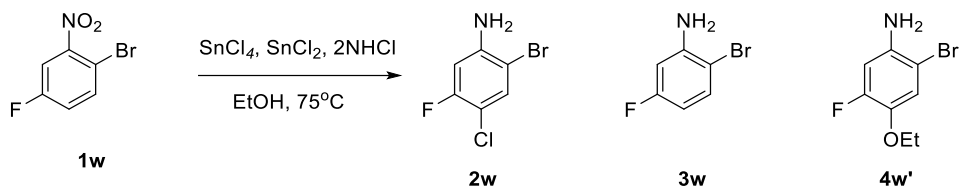

| Name         | 2w       | 3w       | 4w'      |
|--------------|----------|----------|----------|
| Extract mass | 222.9200 | 188.9589 | 232.9852 |
| LC-RT        | ND       | ND       | 3.88 min |
| GC-RT        | ND       | ND       | 6.64 min |

## Chromatogram

Report for "5F-2Br\_11\_01\_5807"  
 Printed: 13:27:33 10/16/14 Computer:1AP05 User:default

### Report for "5F-2Br\_11\_01\_5807"

#### Chromatogram File:

D:\CHEM32\1\DATA\5F-2Br\_11\_01\_5807.d\5F-2Br\_11\_01\_5807.unt

Created on: 10/14/2014 at: 01:23:26 pm  
 on Windows system: 1AP05 by user: TOF-User  
 with HyStar Version 3.2.44.0  
 Operator: default, Laboratory:

Total Chromatogram Runtime: 10.02 min

Signal 1: DAD (254)

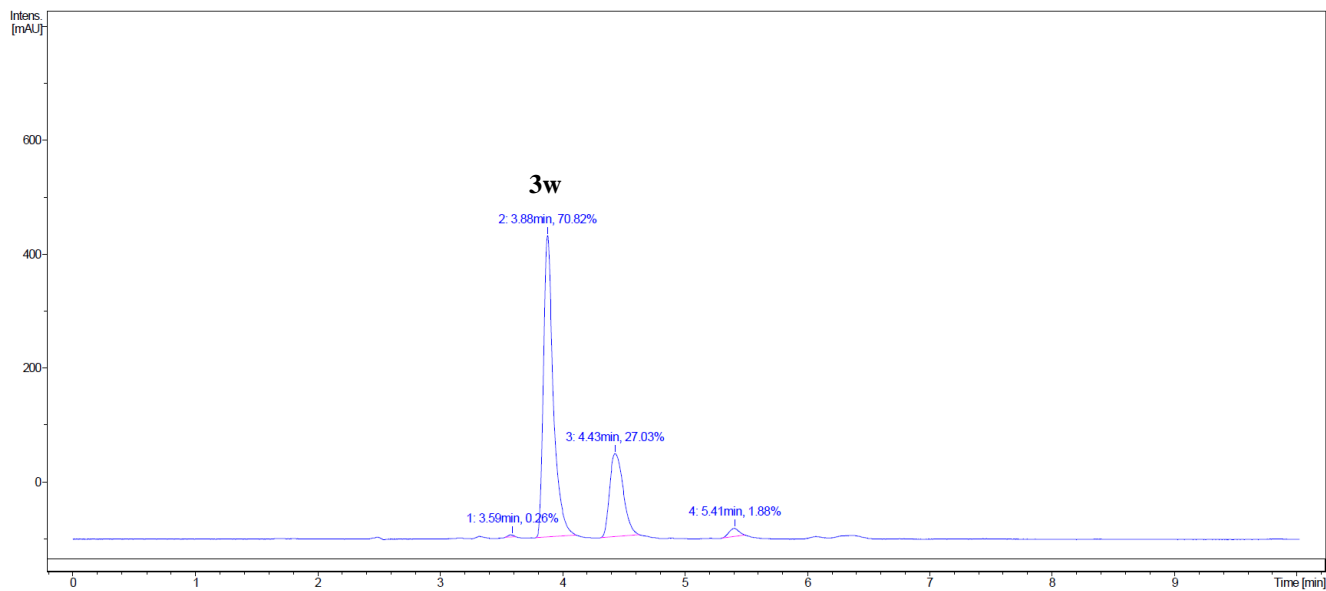



Analysis Date & Time : 2014/10/9 下午 04:33:08  
 User Name : Lab 1336  
 Vial# : 1  
 Sample Name : HYH-20141009 5-F-2-Br red  
 Sample ID : HYH-20141009 5-F-2-Br red  
 Injection Volume : 1 uL  
 Data Name : D:\1336\HYH\20141008\HYH-20141009 5-F-2-Br red.gcd  
 Method Name : D:\1336\HYH\HYH-20140928 for chlorination.gcm  
 \$EndIf\$

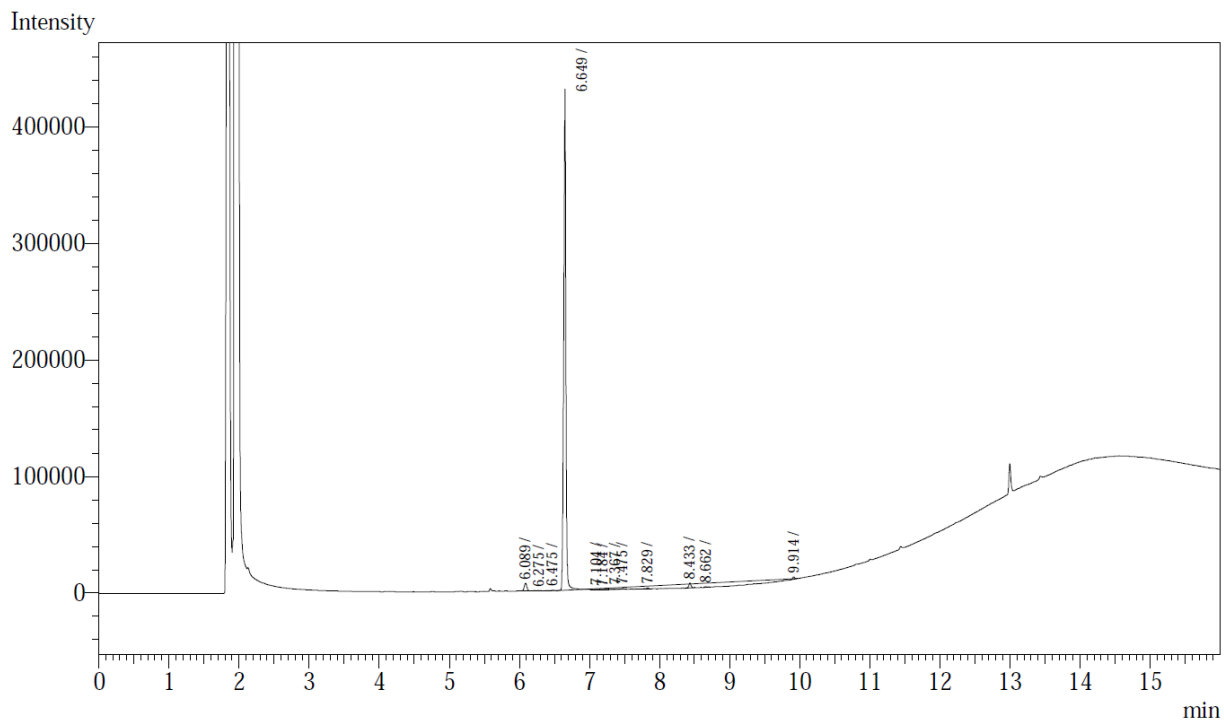

| Peak#        | Ret.Time | Area          | Height        | Area%           |
|--------------|----------|---------------|---------------|-----------------|
| 1            | 6.089    | 17653         | 6263          | 3.2813          |
| 2            | 6.275    | 1411          | 192           | 0.2624          |
| 3            | 6.475    | 1848          | 378           | 0.3435          |
| 4            | 6.649    | 493577        | 341489        | 91.7467         |
| 5            | 7.104    | 1491          | 316           | 0.2771          |
| 6            | 7.184    | 1218          | 221           | 0.2265          |
| 7            | 7.367    | 1493          | 355           | 0.2775          |
| 8            | 7.475    | 1653          | 524           | 0.3073          |
| 9            | 7.829    | 2584          | 714           | 0.4803          |
| 10           | 8.433    | 9137          | 3418          | 1.6984          |
| 11           | 8.662    | 1467          | 524           | 0.2727          |
| 12           | 9.914    | 4446          | 1879          | 0.8264          |
| <b>Total</b> |          | <b>537978</b> | <b>356273</b> | <b>100.0000</b> |
